# Supplementary material for: Li diffusion in plagioclase crystals and glasses – implications for timescales of geological processes
Source: Copernicus journal article supplement (doi:10.5194/ejm-36-985-2024), 2024-12-02
Supplement: Supplementary file 1 [file ejm-36-985-2024-supplement.zip]

## S1 EPMA

Table S1.1: Analytical conditions for EPMA measurements of natural plagioclase crystals and synthetic glasses.

| Element        | Standard material                                | Conditions   | Beam size [ $\mu\text{m}$ ] | Crystal | Peak time [s] | Background time [s] |
|----------------|--------------------------------------------------|--------------|-----------------------------|---------|---------------|---------------------|
| <i>crystal</i> |                                                  |              |                             |         |               |                     |
| Si             | PB-Albite                                        | 15 nA, 15 kV | 5                           | TAP     | 20            | 10                  |
| Al             | CaAl <sub>2</sub> Si <sub>2</sub> O <sub>8</sub> | 15 nA, 15 kV | 5                           | TAP     | 20            | 10                  |
| Na             | PB-Albite                                        | 15 nA, 15 kV | 5                           | TAPL    | 10            | 5                   |
| Mg             | (Mg,Fe) <sub>2</sub> SiO <sub>4</sub>            | 15 nA, 15 kV | 5                           | TAPL    | 40            | 20                  |
| Ti             | TiO <sub>2</sub>                                 | 15 nA, 15 kV | 5                           | PETL    | 20            | 10                  |
| Cr             | Chromite, NMNH117075                             | 15 nA, 15 kV | 5                           | PETL    | 20            | 10                  |
| Fe             | Fe <sub>2</sub> O <sub>3</sub>                   | 15 nA, 15 kV | 5                           | LIFH    | 20            | 10                  |
| Mn             | MnO                                              | 15 nA, 15 kV | 5                           | LIFH    | 20            | 10                  |
| K              | KAlSi <sub>3</sub> O <sub>8</sub>                | 15 nA, 15 kV | 5                           | PETH    | 10            | 5                   |
| Ca             | CaAl <sub>2</sub> Si <sub>2</sub> O <sub>8</sub> | 15 nA, 15 kV | 5                           | PETH    | 20            | 10                  |
| <i>glass</i>   |                                                  |              |                             |         |               |                     |
| Si             | SiFeMgCa_K411*                                   | 10 nA, 15 kV | 12                          | TAP     | 20            | 10                  |
| Al             | Al_MORB1-3*                                      | 10 nA, 15 kV | 12                          | TAP     | 20            | 10                  |
| Na             | NaCr_MORB6*                                      | 10 nA, 15 kV | 12                          | TAPL    | 10            | 5                   |
| Mg             | SiFeMgCa_K411                                    | 10 nA, 15 kV | 12                          | TAPL    | 20            | 10                  |
| Ti             | TiO <sub>2</sub>                                 | 10 nA, 15 kV | 12                          | PETL    | 20            | 10                  |
| Cr             | Chromite, NMNH117075                             | 10 nA, 15 kV | 12                          | PETL    | 20            | 10                  |
| Fe             | SiFeMgCa_K411                                    | 10 nA, 15 kV | 12                          | LIFH    | 20            | 10                  |
| Mn             | MnO                                              | 10 nA, 15 kV | 12                          | LIFH    | 20            | 10                  |
| K              | K_mm3*                                           | 10 nA, 15 kV | 12                          | PETH    | 20            | 10                  |
| Ca             | SiFeMgCa_K411                                    | 10 nA, 15 kV | 12                          | PETH    | 20            | 10                  |

\* In-house standard glasses
