# Supplementary material for: Li diffusion in plagioclase crystals and glasses – implications for timescales of geological processes
Source: Copernicus journal article supplement (doi:10.5194/ejm-36-985-2024), 2024-12-02
Supplement: Supplementary file 1 [file ejm-36-985-2024-supplement.zip]

## Sheet: Li20
Sample	T [°C]	t [s]	p [bar]
Li20	606	599621	2000
Linescan															Lines parallel to interface					Isotope profile
Distance [µm]	Li7_ppm	Na23_ppm	Mg25_ppm	Al27_ppm	Si29_ppm	K39_ppm	Ca43_ppm	Ti49_ppm	Mn55_ppm	Fe57_ppm	Cu63_ppm	Sr88_ppm	Ba137_ppm		Distance [µm]	ΔDistance [µm]	Li7_ppm	2SE		Distance [µm]	ΔDistance [µm]	δ7LiIRMM-16	2s
0	82.6113	17304.6	-19.4054	168770	239313	173.047	103648	28.7845	4.00763	244.484	20.6924	36.9385	8.97658		Crystal					Crystal
2.384	99.2525	18250.1	79.5989	158193	242235	166.955	112014	-0.734365	20.3671	707.185	12.6743	38.0028	9.94568		18.319	12	37.2521	0.866839		29	13	-4.27938	1.94791
4.768	99.355	17434.2	-36.05	177401	219444	233.075	121995	-0.849521	6.65249	497.232	17.3372	46.571	-4.81628		59.138	12	29.4312	0.708683		79.9165	13	-16.5012	1.87459
7.14801	103.143	16409	-19.7461	172826	233670	231.689	107290	16.408	21.5376	561.109	16.7206	42.4419	4.18938		99.289	12	23.655	0.634833		120.584	13	-31.33	2.01478
9.53201	91.2111	17365.4	25.9566	181003	217319	208.118	120334	15.2866	7.55351	545.275	22.2387	44.9234	1.70935		140.109	12	17.1345	0.552702		165.25	13	-53.1298	2.21608
11.916	109.211	17876.7	78.5118	172122	230505	232.113	111547	4.7131	5.63674	591.265	19.0999	36.3755	-0.145473		179.59	12	11.4968	0.49707		211.25	13	-67.3625	2.41484
14.3	106.589	15346.3	38.4806	177936	214708	155.222	130308	7.55824	3.95796	694.057	12.5775	39.1244	2.85692		219.741	12	7.9026	0.434957		257.916	13	-64.1221	2.58714
16.68	92.3577	15018.4	82.4252	152318	239041	151.976	127918	10.14	14.4692	759.033	13.2315	35.211	0.485885		261.23	12	5.682	0.408578		308.584	13	-49.1573	3.36021
19.064	103.745	15688.5	27.2266	172496	233179	168.438	109369	3.66951	17.7744	378.711	18.124	42.2529	-3.38108		301.046	12	4.87875	0.409288		357.25	13	-39.6201	3.05161
21.448	114.106	17772.2	78.0493	190817	213430	166.942	112311	4.68487	25.2202	834.111	17.0811	41.0937	5.54416		340.862	12	4.14969	0.388068		408.584	13	-33.6479	3.02002
23.828	104.242	16886.3	71.5029	166206	232506	138.957	117538	31.3179	15.8916	530.267	23.4454	35.6357	0.475246		381.012	12	4.14696	0.391286		457.25	13	-33.2443	2.97451
26.212	106.634	16781.5	93.1802	176594	228855	142.191	108727	3.62989	15.7814	1034.74	17.9264	42.4166	3.05194		420.494	12	3.95082	0.349657		552.417	13	-38.3085	3.60477
28.596	91.994	17928	35.258	173024	226141	185.719	116958	-0.788735	4.8012	717.953	19.2264	40.0711	-1.69006		459.306	12	4.10806	0.347543		746.417	13	-35.1317	2.72118
30.98	124.627	18075.5	12.8628	180182	220573	190.691	115606	27.2084	6.46242	718.403	10.3193	37.5482	3.07975		497.783	12	4.20849	0.391871		1147.24	13	-33.1178	2.71362
33.36	109.847	18741.7	11.963	167433	236192	104.832	108514	4.44847	19.2121	585.38	13.8088	46.0501	16.0658		536.763	12	4.27165	0.362567		Glass
35.744	113.998	17933.4	67.4621	170730	226977	130.527	118605	4.60088	-3.93661	875.911	15.5267	38.1279	2.96159		574.576	12	4.2216	0.359777		-65.763	13	9.13407	2.0318
38.128	105.013	15344.4	11.288	177901	222205	110.731	119123	14.0262	6.30914	513.11	17.5639	38.0824	1.56863		Glass					-124.746	13	10.9416	1.99781
40.508	100.419	18058.1	56.3682	180958	218502	120.696	118193	10.8872	-0.0743404	312.907	8.89271	29.4608	4.04478		-19.322	12	76.3521	1.60255		-183.729	13	9.50064	2.20227
42.892	98.569	14298.2	11.3709	180255	223642	178.052	114729	-0.72486	2.8184	516.536	16.5405	35.0011	-0.699686		-58.72	12	85.1256	1.42622		-241.271	13	9.12469	2.15029
45.276	96.2895	15957	78.2567	160288	239973	141.604	115090	14.8165	10.3778	459.703	29.3515	35.3609	5.24383		-100.125	12	87.2882	1.73754		-331.271	13	8.24264	1.95949
47.66	110.353	15348.6	38.5267	155685	252576	128.557	102462	20.0403	14.4477	666.387	16.1793	44.9696	6.44951		-141.531	12	91.0608	1.79448		-419.407	13	6.69322	1.91731
50.04	93.8792	17642	17.0136	171688	228054	141.354	116302	-0.790481	3.42972	577.755	19.2912	31.9105	4.20942		-181.598	12	92.8016	1.7076		-506.525	13	6.17163	1.79465
52.424	106.357	16268.7	37.9134	158979	240841	137.442	115096	11.5311	22.8602	655.641	17.1007	29.8588	3.9894		-222.083	12	96.7009	1.71468		-595	13	6.74238	1.79892
54.808	98.4119	18064.1	97.3044	170661	220368	154.338	129054	7.31463	-2.35588	432.129	13.9113	32.7598	4.21302		-260.895	12	98.254	1.74382		-773.305	13	5.83775	1.68513
57.188	100.666	14461.4	-5.94914	183151	218285	187.53	118501	-9.406	3.77558	903.523	14.268	37.4874	15.3613		-296.675	12	100.47	1.49488
59.572	101.768	17283.4	86.0542	160960	234033	196.56	121742	9.50505	3.92933	684.121	17.1371	39.1499	-3.08618		-336.814	12	100.751	1.66176
61.956	135.437	18612.2	62.0328	167899	225422	175.621	124420	28.9807	7.87009	470.37	14.6906	41.9659	-1.66876		-375.897	12	103.398	2.03881
64.34	87.8311	15579.9	34.73	158954	241179	165.324	115586	11.9289	3.02767	342.706	15.8553	32.2763	6.56453		-414.883	12	103.243	1.68814
66.72	106.771	17219.3	112.856	178599	218590	129.852	121528	3.36955	5.29285	769.3	16.0364	45.9229	7.28272		-456.071	12	103.014	1.86708
69.104	103.389	17837.3	20.9642	179303	214237	176.395	126878	11.7832	7.74821	587.041	11.4339	43.6414	1.66885		-500.235	12	103.276	1.82796
71.488	110.598	16050.2	79.7728	176159	218870	169.36	125619	19.2956	5.46923	654.718	13.8415	34.0977	9.66851		-539.245	12	100.829	1.67766
73.868	104.692	15270.1	-33.0021	174700	223245	198.858	121615	7.72456	17.5389	821.065	20.8258	37.5791	1.39023		-579.35	12	104.088	1.64826
76.252	112.367	17002.2	64.9205	178520	221128	151.672	118134	4.74735	15.8268	609.57	19.8664	38.2823	4.33548
78.636	104.999	16157.7	-42.6379	179031	218894	165.014	121740	-5.09828	6.94159	704.531	14.2731	40.937	-0.140991
81.02	93.4514	15899.1	49.6671	179865	224060	160.975	112522	-8.69656	13.2096	1085.31	19.5217	34.2904	3.88347
83.4	108.515	17871.2	43.7787	174222	213402	207.144	134900	-0.773557	9.57263	622.253	18.9139	37.0427	4.12777
85.784	105.861	16853.3	16.1453	169188	229767	132.772	117801	11.5177	6.58613	546.697	28.2948	32.1183	16.9278
88.168	110.462	17751.3	-10.6837	163344	225722	166.194	130777	3.58692	19.1852	818.609	20.2334	36.7379	-4.87981
90.548	125.963	18945.5	100.211	171036	224567	237.079	120996	-5.12623	3.46692	608.277	19.0466	42.1812	4.22516
92.932	111.224	17069.7	97.7968	164182	231498	196.82	121410	-5.24387	10.0295	724.712	21.7249	38.7861	3.04594
95.316	110.808	17429.1	66.5716	174959	219079	242.56	125764	9.84778	6.5078	413.898	29.4097	38.1637	1.69584
97.696	100.157	17058.3	117.345	182604	214049	221.553	123183	3.64523	19.8628	713.982	25.7101	40.8826	0.496136
100.08	84.1665	15478.9	-32.0226	173974	221776	161.939	124921	-9.01192	9.67873	620.302	14.8639	34.763	1.64795
102.464	111.646	17259.6	30.6238	173951	220553	140.33	125132	25.9773	12.8178	417.009	23.4491	38.6513	12.7992
104.848	118.079	16445.6	95.2617	168277	224972	135.181	126750	4.61034	13.6321	434.845	22.4044	42.0225	9.18144
107.228	121.499	17172.8	21.5982	167907	224179	187.401	127657	-0.784591	18.4678	603.514	18.5887	35.2034	4.1928
109.612	93.0816	17043.2	105.769	175893	226184	208.086	114154	10.1338	7.41432	281.486	15.7394	37.4247	3.0037
111.996	91.2344	16508.9	29.1744	178279	225441	155.5	112491	-5.8412	8.24052	558.677	14.0905	36.2424	-1.89358
114.376	91.4491	16738.8	-10.2465	187008	212883	121.573	119643	4.50995	-1.74973	676.323	19.4757	37.3427	-4.69691
116.76	102.934	15142.4	51.2794	161499	224475	151.407	137741	12.6569	18.9288	704.371	18.1148	36.7634	-11.4591
119.144	96.3119	15313.3	58.7872	178737	214800	186.891	128624	7.88874	-3.90948	1196.34	18.1283	35.3157	6.10423
121.528	92.1326	17105.3	66.1646	165417	227206	161.011	126468	16.112	26.6957	564.196	18.2391	41.264	12.6169
123.908	116.548	17453.8	-65.6811	170971	222477	155.667	125880	4.96112	22.2241	697.862	20.4156	35.8482	16.5648
126.292	101.737	16897.8	22.6893	177611	227726	151.86	109432	-0.82188	10.2246	647.735	17.5392	37.7626	-9.88419
128.676	106.602	17731.2	-21.6888	195673	206477	184.115	115982	-18.7354	3.45055	1486.4	15.7741	44.5762	10.1302
131.056	108.493	15012	38.6464	166678	234779	208.947	115441	28.363	7.74359	281.445	20.9822	38.1405	1.66069
133.44	101.063	20790.3	-49.2159	171662	225080	195.298	117638	-9.81701	25.1792	824.194	15.5435	39.3492	-2.08865
135.824	102.708	16316.1	115.271	161917	237818	222.019	115204	25.4722	15.9726	1004.49	18.2878	40.1406	4.58318
138.208	115.441	16337.3	31.6075	176241	225884	180.322	114441	-8.15514	10.7216	793.559	23.521	45.1971	-4.58717
140.588	92.2528	17015.4	21.8263	165152	219586	243.842	138389	31.7097	2.79327	736.631	24.9831	38.5087	7.96575
142.972	122.634	18771.5	118.484	187628	211921	182.791	118024	-6.44334	17.1512	705.434	17.4945	40.8302	6.9765
145.356	124.644	17870.4	163.686	168279	226373	161.121	123014	8.04726	6.09231	562.457	15.9321	39.7528	4.31525
147.736	109.274	18761	87.8201	171860	223011	176.136	122558	8.0057	14.6427	559.533	13.3061	40.1661	4.29294
150.12	98.9795	16493.1	42.2578	171970	229736	154.504	114327	15.5689	14.8862	625.877	17.0321	38.5317	7.2029
152.504	109.965	16580.5	-1.24823	177130	222585	115.874	118333	-0.794574	12.0453	598.232	16.9816	36.3592	-2.02748
154.888	111.55	16043.2	57.7889	170231	230131	195.818	116176	16.2735	13.8322	907.451	16.5716	35.4813	5.38202
157.268	120.236	15877	56.4178	188480	209294	175.714	123653	3.69474	26.3919	797.442	20.8192	40.9802	7.00247
159.652	96.1525	17839.3	30.4449	162453	238932	199.367	111719	4.53512	11.3677	735.656	16.5087	34.1501	7.49985
162.036	106.59	16256.5	35.7655	172629	222495	231.239	124607	-5.1321	24.3217	709.416	15.0024	40.0163	5.48356
164.416	101.085	14900.1	-24.1479	161182	242107	206.447	111782	36.9171	8.04176	334.056	26.7077	41.7228	7.92099
166.8	109.457	17214.5	-14.8388	178110	224953	137.815	112550	15.2386	10.7465	824.54	17.8373	34.1499	0.476111
169.184	111.879	16890	85.787	168466	224850	233.747	126020	21.8809	19.1712	591.955	21.5906	43.1244	5.73459
171.564	110.387	16564.9	-24.5702	174050	209162	209.431	142905	7.97171	13.8818	658.27	18.3115	33.4142	5.5363
173.948	112.612	17636.1	50.9644	168179	229998	177.131	117814	-0.809708	22.4344	727.974	12.1779	34.174	14.2855
176.332	118.531	17419.7	21.9485	168253	223020	146.376	128170	-17.0969	20.8334	1255.98	28.2119	38.4406	2.98811
178.716	101.755	16448.1	109.646	169657	226935	234.51	121600	3.54921	24.6541	651.18	25.6295	43.6228	-0.764604
181.096	122.314	18641.7	132.858	166690	228612	156.325	121068	-7.75373	18.0577	546.728	18.7329	31.58	0.467881
183.48	104.768	18468.4	77.515	175391	231984	112.404	104420	4.64563	20.1315	566.697	20.0444	31.3058	4.23948
185.864	102.644	16651.9	50.4378	186326	205234	157.799	132486	-18.4356	8.24182	399.957	18.4149	42.485	3.02965
188.244	119.631	17583	52.6566	178529	212687	145.304	130176	4.91746	14.5847	934.075	29.1927	38.5277	0.51341
190.628	98.3029	18363.3	8.32301	169634	229489	154.117	115950	17.1197	24.7666	776.723	16.1353	36.6904	9.533
193.012	104.506	19232.1	-1.22071	168951	226271	203.378	120894	10.4884	14.7051	813.602	20.8534	39.9887	4.41079
195.396	112.176	17792	74.1716	187111	217833	233.727	110762	12.4669	15.8174	561.82	17.196	39.1002	9.40511
197.776	84.7593	16426.5	39.0688	174124	229268	111.416	112427	14.9667	16.3613	449.586	22.3628	36.8775	-3.1534
200.16	111.541	15387.6	-10.4382	177331	226281	174.763	113255	29.6714	10.2639	840.056	18.1741	32.5529	8.00037
202.544	132.662	20777.9	136.136	169475	228178	203.07	116119	16.44	12.7381	220.04	17.2444	42.4505	3.16599
204.924	102.618	17221.2	44.718	165625	241553	132.005	104142	-0.781143	8.4139	660.822	20.4762	32.4215	-4.47796
207.308	105.686	16525.1	22.5225	186022	213896	184.526	119546	-9.71295	-4.67877	668.434	17.3105	35.8131	-3.34778
209.692	105.101	18404.3	103.775	173530	225802	273.634	116253	34.3711	-1.11869	565.381	15.5446	40.633	11.3378
212.076	151.198	18335.5	127.21	176133	213293	182.955	131556	-6.90761	11.0017	995.347	6.21677	50.3518	7.48406
214.456	115.737	16850.2	32.8095	178841	216445	187.715	124952	8.2995	12.9968	685.001	15.7631	30.7153	0.509433
216.84	115.115	17866.7	13.261	181117	217782	116.991	118823	21.7933	21.6947	783.435	14.3161	35.5276	-0.796771
219.224	78.1662	21724	-23.7358	168002	231019	153.878	112641	45.9523	22.1017	735.708	24.4861	40.9295	10.2542
221.604	109.08	18772.3	129.48	175150	225561	203.296	113966	22.7512	15.7511	708.686	17.6723	40.6281	15.1353
223.988	114.915	17573.7	42.256	173592	223909	197.485	120153	10.5059	6.28776	410.743	20.8843	39.6249	3.11396
226.372	108.538	15687.3	103.33	178003	220797	174.595	120435	9.88792	20.4636	724.517	15.3449	36.0947	4.15808
228.756	114.086	17841.1	76.2957	157585	235752	221.783	123188	12.8164	8.89623	577.341	26.213	42.9596	-7.34383
231.136	120.921	17001	-43.218	173299	221238	143.897	124945	-0.795271	13.2317	833.165	12.6328	40.0559	8.0747
233.52	127.613	19519.2	3.78515	168853	229626	212.863	115875	22.5571	26.647	455.251	16.1686	42.474	5.91189
235.904	122.626	17155.7	32.2753	163976	228890	124.883	125884	26.0866	13.5091	510.013	11.6003	31.8549	6.95228
238.284	107.065	17400.9	3.64077	177611	211092	255.88	133921	3.67999	1.50259	1060.14	16.8181	34.4541	3.08848
240.668	100.565	17460.8	59.1471	181968	220188	118.991	114537	-6.22845	0.395378	638.884	18.177	35.8227	-3.27199
243.052	98.1924	16041.2	27.2552	164971	230752	152.171	122880	16.9601	15.5512	417.177	10.2084	34.4688	8.16528
245.436	113.136	15637.7	77.4148	165925	229726	174.3	123198	-0.784623	8.84921	708.097	21.868	36.9109	2.98087
247.816	98.3675	17519.7	109.881	167122	238167	153.895	107136	3.55675	-1.71586	422.279	16.8796	38.7898	2.9848
250.2	116.509	20766.1	121.892	181143	212540	202.804	123777	-15.3202	13.352	865.963	11.7665	37.3823	5.04349
252.584	90.647	16779.3	-24.2422	151723	239555	165.881	126392	-0.78643	3.2281	738.734	15.6473	41.4942	-0.765589
254.964	127.661	17670.5	-5.88624	173046	224076	117.964	120323	30.5134	-5.03427	745.394	17.2323	40.8108	12.0911
257.348	105.823	16889.9	45.6704	183068	210055	98.6071	129070	21.161	7.54191	644.422	12.6295	35.9327	9.33744
259.732	105.872	16127.7	146.681	181519	223911	244.475	110274	-5.28619	22.2328	864	16.1092	37.6844	13.3857
262.112	123.886	15304.3	53.1626	188304	203819	154.629	133037	-5.47399	-3.32787	619.145	26.725	37.2857	-0.816079
264.496	116.372	17451.4	103.681	181924	220600	162.325	113933	5.01257	12.244	533.235	14.16	40.998	-1.8371
266.88	88.129	16101.3	53.9205	164402	237445	103.949	113386	12.1288	12.2852	418.252	10.5094	36.4146	9.14845
269.264	98.8488	14934.8	93.7431	180500	218263	215.162	121542	3.64767	17.7771	873.866	9.5897	36.6409	-8.15152
271.644	129.724	18760.1	95.1092	182267	211957	136.132	125203	-0.859492	15.135	776.713	15.7452	47.8526	4.64012
274.028	100.707	18379.9	85.5333	168735	228072	165.916	119148	-0.865046	17.5714	860.942	20.6909	40.5368	14.3197
276.412	94.15	16497.1	17.3171	161346	235491	83.966	119981	20.7741	18.2666	604.071	21.7355	38.3032	0.48206
278.792	108.251	18130	70.0927	175570	221607	143.092	120249	-10.4191	8.2219	701.172	17.8827	39.5479	3.28487
281.176	100.528	14068.5	71.959	168633	235657	150.939	112192	-0.773354	12.2409	529.517	16.0308	39.4671	7.87605
283.56	100.775	16026.7	-47.4927	176394	224823	164.307	116376	-6.23862	16.36	683.165	20.7305	37.9351	10.5294
285.944	106.16	17424	101.747	167366	232208	131.236	116015	-9.56805	9.6923	441.006	22.126	34.4682	0.49086
288.324	117.203	17174.3	3.70723	177265	223288	185.913	116365	-5.30262	4.45149	688.788	9.67474	36.5471	-4.66893
290.708	104.222	17315.6	36.4926	165678	224276	150.235	130440	12.4249	10.0949	573.844	16.492	35.44	9.37127
293.092	106.199	16686.6	18.4169	167576	227526	147.619	123850	-6.54804	-8.46985	278.664	15.1484	39.3898	0.512183
295.472	107.028	18852.9	33.972	186931	216940	164.444	111264	34.4395	4.66912	768.067	23.2166	34.0916	-0.150632
297.856	101.143	15891.8	8.55412	177369	218850	152.425	124463	12.7395	4.85178	468.942	17.5613	37.8184	-1.77011
300.24	93.5777	18275.6	12.9074	184082	212881	173.481	122147	25.3511	20.9518	509.695	21.966	33.4002	0.48749
302.624	100.554	15758.2	81.758	170846	227452	177.892	119998	10.015	9.89659	619.206	14.9103	39.3762	1.41516
305.004	90.2729	18775	72.2274	179898	227641	153.901	104737	-6.56273	23.5645	506.523	14.5205	39.4813	3.15478
307.388	120.523	18174.7	13.7356	177972	213745	171.412	129210	-6.6294	22.2977	450.461	30.067	37.2775	5.85502
309.772	93.1366	17466.5	-18.452	171479	225846	127.916	120159	3.36969	-0.586882	603.057	17.1643	38.645	0.460138
312.152	99.1096	17488.8	48.4958	162413	232868	137.682	121527	-0.760974	19.2875	605.557	14.5823	36.9269	10.1952
314.536	99.8331	17037.9	26.9266	184446	208712	175.82	129210	6.4976	14.2875	540.22	8.15064	33.105	-3.28489
316.92	119.42	16094.8	13.4933	187891	224627	204.706	101323	-6.50016	9.3214	291.561	22.4261	36.3393	1.81701
319.304	105	16536.2	53.6607	180798	213294	124.941	127532	22.5146	22.4798	592.703	17.4808	34.7213	-2.16587
321.684	108.748	17913.8	18.2537	162362	234925	352.316	117869	-12.1366	1.56829	664.295	9.75156	32.598	1.48458
324.068	86.4252	15619.7	151.483	173653	226986	128.25	116841	30.5172	-2.08357	804.167	18.0392	41.2294	9.51638
326.452	105.584	19467.1	9.17055	179520	220328	193.211	115801	8.76	2.45153	467.659	22.879	45.4773	6.08051
328.832	104.986	14734.4	-84.48	179363	229265	187.271	106926	-0.784112	8.5863	595.729	16.927	39.1073	4.56167
331.216	107.816	18875.6	89.4401	169124	227005	228.975	119963	8.59126	-9.85837	598.932	18.3466	45.4844	10.0392
333.6	111.859	18857.8	63.4476	160400	226765	147.13	132136	10.8059	17.1293	667.864	23.4857	38.1122	8.56508
335.98	122.467	16758.4	39.074	167783	236303	188.122	109241	22.6994	23.4396	1017.4	25.7869	40.743	1.88299
338.364	105.345	16955.1	-56.6136	174766	219881	219.375	125226	5.07597	16.2938	633.12	12.2697	35.2589	22.3761
340.748	102.162	16573.3	131.726	171873	226119	116.31	120101	17.1203	16.083	323.365	24.1803	45.7568	0.537276
343.132	116.038	18811.4	89.4527	171854	215935	147.749	133464	5.35172	1.3417	419.735	30.2734	39.047	22.1512
345.512	117.785	18960.6	168.453	178830	224572	191.96	110712	-0.923828	10.138	278.46	16.9946	42.2694	6.48881
347.896	127.272	18001.1	97.9466	164164	228427	176.225	125378	29.7072	2.90576	523.852	19.7288	38.8993	1.95698
350.28	95.0837	16465.5	46.5755	177475	231529	103.373	104444	12.5866	9.53796	389.307	17.9899	42.7943	8.20735
352.66	118.244	17708.9	97.4736	177835	209206	157.562	136717	3.99312	24.2439	424.652	26.657	42.1175	-5.05915
355.044	110.057	15978.7	36.9477	173075	224339	96.2622	121635	10.3213	4.45365	623.042	12.7904	39.9431	17.4628
357.428	108.807	18609.6	54.3434	169579	224476	145.028	123599	13.3285	7.03282	568.292	25.8784	37.3417	1.88994
359.812	105.421	16782.1	30.628	165851	237775	158.432	110281	24.6199	14.5424	341.008	14.6063	34.2156	2.90911
362.192	117.218	16093.8	32.7527	190952	208186	100.564	122189	-9.85858	2.69485	528.895	19.5375	38.0693	4.41236
364.576	95.7677	17575.9	35.1138	169321	231055	76.5568	115035	9.80554	17.9627	522.054	13.9815	41.9059	-6.82389
366.96	95.4689	16326.9	91.1484	192651	216769	127.618	106418	9.54652	9.13647	576.19	20.7433	41.1846	-3.09112
369.34	105.91	17358.2	-20.1608	185055	223086	130.177	105950	4.82903	5.98994	780.815	23.3977	44.9492	-2.09106
371.724	99.5001	16913.2	79.1998	168892	223335	126.795	127564	-0.794797	13.0662	955.998	14.6427	43.8891	1.77012
374.108	87.0268	16107.5	102.246	154162	242600	111.271	118909	-0.755862	-2.61303	825.87	23.6563	38.3906	5.31845
376.492	113.68	17511.5	76.2204	167611	232213	142.24	115643	-5.34133	19.6246	379.898	16.944	33.6571	8.32783
378.872	110.766	17057.5	-39.8052	182720	217586	149.024	117764	10.5817	23.4682	804.277	15.0866	40.9454	3.13638
381.256	95.551	16065.4	91.9697	165853	232132	150.342	119098	40.7545	-1.56067	814.104	20.3246	41.93	-0.728926
383.64	103.849	15959.8	-0.904494	178456	219112	111.744	122447	-0.784747	9.36687	597.887	30.2606	41.7244	1.74914
386.02	110.296	17017.9	36.1395	172223	227205	132.917	117602	20.9526	14.6077	350.248	15.6354	39.0273	12.372
388.404	116.662	16021.5	36.7959	176647	218647	129.68	125692	-6.32352	9.11859	371.106	19.7478	39.9293	-2.0502
390.788	84.57	15780.7	85.4375	190068	212535	149.436	117059	-9.81621	16.9683	437.31	14.901	37.2763	0.50535
393.172	121.349	16180.5	-24.4307	157397	234470	159.049	127024	12.4664	23.8303	721.055	16.5368	41.5488	-2.04819
395.552	105.778	17401	95.0663	179346	222761	126.895	114136	-9.81896	5.63433	630.888	20.7627	41.9329	6.9893
397.936	114.264	16490.3	59.3346	176208	234090	134.673	102107	-0.779561	5.4386	465.187	17.5236	37.0011	-3.26614
400.32	126.362	17165.6	3.86989	167653	233207	107.504	114513	-5.27102	9.94706	360.136	19.3076	40.7617	9.50673
402.7	100.587	18437.8	82.7686	181788	217614	129.278	117855	17.661	9.91403	463.993	21.9701	36.0887	-0.811592
405.084	91.0528	16250.2	95.9664	187645	224324	77.1407	101825	20.8651	-4.77624	491.637	20.5704	36.8336	-2.0056
407.468	100.682	16630.3	41.3778	162968	233765	86.7168	120145	-0.789736	24.1305	762.578	17.7621	34.1998	-4.57891
409.852	87.5933	16752.1	21.8219	180604	224196	124.463	111114	-5.01747	3.94668	497.363	17.7643	34.6161	4.15167
412.232	111.211	18997	28.6764	166994	232050	143.764	115191	4.95764	9.18312	525.847	32.7059	47.8607	5.84962
414.616	103.34	17759.9	58.5525	187631	216445	138.338	111931	8.47099	1.67232	1004.73	26.8154	39.8089	6.54759
417	96.2354	16836.5	99.1104	173018	221172	143.616	125696	17.9408	11.2238	548.8	18.0763	39.7388	0.527204
419.38	104.149	17190.6	55.198	174016	230504	99.3759	109646	-6.26653	14.4029	758.724	10.7052	40.4002	14.3752
421.764	107.011	16984.1	89.96	176890	216177	92.24	127711	-0.803639	12.5563	880.339	22.9525	37.1453	5.67135
424.148	107.333	16181.5	23.4662	171414	212756	140.122	141332	10.6098	-9.48691	700.369	18.4248	35.9031	-4.74932
426.528	101.689	14793.1	27.2675	173360	227469	200.516	117754	15.7075	9.44951	383.36	27.2601	34.1345	3.02598
428.912	97.9816	17750.4	-67.1014	205695	198878	172.664	115019	5.11998	19.2001	495.542	11.67	31.2726	-3.59068
431.296	88.1086	16103.9	32.5336	171650	234955	160.726	107154	21.5812	3.07463	656.22	14.1611	40.4024	6.94473
433.68	102.094	18795.8	28.2802	163149	231771	144.646	120911	14.3797	22.3865	638.12	19.0306	46.4852	-3.42399
436.06	115.046	16085.5	53.9911	183454	211910	131.035	126330	10.87	12.3492	763.838	17.5208	42.268	1.87397
438.444	108.273	16460.3	63.9699	172856	229563	151.359	113641	5.01632	-1.72185	377.145	26.9938	40.5126	-0.821733
440.828	102.506	18121.6	28.9808	176362	223988	164.585	115846	-0.835422	12.3204	391.595	28.2758	36.2492	8.59151
443.208	94.3442	17100.2	23.8686	180453	221300	158.238	115161	-0.830375	7.34769	696.013	31.4631	38.647	4.53132
445.592	117.146	18088.9	94.2353	185797	213768	129.837	118661	8.55825	7.05428	440.463	15.544	38.6684	-4.88192
447.976	94.1883	16070.7	3.91525	178956	228113	95.4236	107701	30.2751	-6.3114	826.476	24.9398	32.778	5.60843
450.36	106.365	17479.7	-11.1689	174410	225770	137.236	116142	-0.862793	-5.68718	739.399	25.7292	45.1498	-3.62535
452.74	113.034	19189.4	19.5465	169130	224977	175.401	122659	11.1309	24.7308	813.695	15.861	39.2332	-1.87623
455.124	92.1182	15669.9	107.849	186780	223060	116.529	105259	-9.66297	22.5154	694.033	16.5926	35.2491	5.60457
457.508	114.197	15388.1	22.3522	167797	240229	112.324	105245	3.56826	-12.8755	435.846	15.6254	33.3058	0.488357
459.888	112.47	17627	-16.0946	172853	226106	124.377	117539	-0.852307	-8.32607	809.551	14.4027	42.1667	6.02906
462.272	127.715	20062.3	-31.9078	174620	217965	155.977	125281	-13.0144	21.1171	728.136	22.3877	39.7523	3.34296
464.656	106.516	18122.9	14.4678	174058	227080	123.002	113979	17.1227	9.9374	702.636	13.7801	36.9798	11.5781
467.04	108.283	17532.7	59.0303	161308	239540	113.983	112682	3.84694	32.1499	686.359	18.1963	29.3182	7.26595
469.42	104.597	16383.9	85.8196	165266	232648	118.521	119082	27.8602	19.6388	527.497	17.2121	37.8104	-0.839255
471.804	100.705	18695	-20.181	156286	236795	131.026	122773	21.9434	5.74133	546.74	13.0808	32.9703	-3.41784
474.188	94.6367	17279.3	51.2508	167570	229499	87.7012	120511	-11.8931	6.68548	20.1115	34.5755	31.7509	11.0424
476.568	117.084	16811.2	43.7324	178153	216524	67.7237	126090	16.5926	16.8069	419.931	27.952	42.8001	7.20804
478.952	107.171	17049.9	-5.99154	171520	225947	162.304	120515	5.18991	1.78697	325.859	24.417	39.6264	14.4843
481.336	118.083	17589	186.91	175124	225661	104.809	114996	-0.87354	10.5586	749.847	21.1456	44.8784	-5.43831
483.72	102.32	14878.8	104.581	177018	215795	94.3449	130131	26.1703	25.3954	851.782	14.2187	39.3075	1.79951
486.1	105.172	17073.4	-53.4354	170205	231111	137.161	114262	-9.79316	10.0614	554.82	18.1165	39.7316	10.857
488.484	104.695	18858	19.1204	176153	222496	89.0012	117644	5.00893	9.7034	530.515	26.938	39.7743	1.87108
490.868	85.3196	15829	103.537	183150	223430	101.974	109734	-0.758811	15.0583	398.678	18.9934	37.2103	4.45944
493.248	90.6967	16366.4	170.398	171849	219011	215.863	130672	4.7835	18.6961	786.704	23.1462	39.2372	10.7791
495.632	87.4821	15060.2	17.9509	167714	232194	102.993	117705	-0.781338	16.5808	729.136	29.6958	38.1209	-0.768287
498.016	112.778	17110.3	-14.9298	169281	226835	165.723	121676	15.8685	1.29159	812.387	16.6192	37.3898	9.45071
500.396	111.362	15903.3	4.10023	187194	216061	140.645	115300	17.4501	9.1158	623.766	19.7185	36.0722	-8.3565
502.78	110.805	17983.6	44.4449	189011	209636	146.348	120494	10.9541	17.0861	753.625	13.0473	32.4084	4.6046
505.164	100.56	17948.5	34.1092	177920	218291	201.296	122164	28.404	20.7431	793.579	39.1299	39.1495	3.2193
507.548	107.628	18178.1	14.1695	186267	218161	149.916	111089	22.5306	18.0631	638.269	22.8791	33.849	13.9742
509.928	105.494	19017.5	37.8334	173281	221233	185.961	123229	8.24696	23.0163	468.844	26.7432	42.1256	4.41798
512.312	101.414	19317.3	90.5961	165325	235729	140.915	111551	-6.11933	14.1312	443.812	31.508	41.6852	0.48242
514.696	122.418	19216.7	-29.7002	166187	220857	123.422	133045	17.3198	-6.40153	768.718	16.2965	43.447	9.64007
517.076	110.195	18781.6	-31.0954	168290	234893	145.884	109148	22.8883	21.8266	758.123	17.0695	40.8362	4.63288
519.46	116.849	16164.7	-0.687021	177965	215589	151.329	128191	4.59081	10.6501	655.693	17.875	39.6527	9.11004
521.844	117.998	15716.8	74.4983	163576	231233	173.9	124105	15.761	10.9739	558.976	20.9669	36.9263	-0.773027
524.228	126.543	16072.1	27.7222	186999	217180	121.412	113553	8.10092	20.0874	724.76	17.2729	39.4995	4.33957
526.608	99.5945	14376	91.3741	170849	231507	124.312	115366	-11.0159	21.2605	412.385	26.6813	33.6547	-3.08848
528.992	95.3388	16825.7	102.803	171843	231866	111.744	110435	6.57465	12.0663	1142.95	22.2623	37.3724	-3.31564
531.376	99.0187	16329.3	-9.42081	162840	234929	137.216	118777	-0.732946	-5.47579	848.581	24.9392	39.1191	5.20787
533.756	105.609	15578.3	42.4156	179805	220200	132.61	119820	-6.42001	5.3463	20.0523	17.4676	36.1526	-4.99329
536.14	106.663	15702.3	-18.0962	175336	229365	88.3982	111594	-0.728928	10.2035	234.872	22.4393	45.6395	13.4392
538.524	107.983	17893	4.02756	166161	228286	146.914	122968	-0.784177	9.54665	777.18	17.7713	38.9765	-0.137774
540.908	111.431	17662.4	27.4816	171136	230334	172.131	113588	-0.78307	12.7574	441.518	19.0215	43.0565	-2.0392
543.288	105.097	15912.7	28.921	184440	221680	143.408	110386	10.7635	17.5674	617.655	26.7129	41.8296	-0.811705
545.672	114.765	18411.4	109.956	173221	221321	138.13	123516	16.8691	32.4749	660.494	21.7564	39.9614	-0.147406
548.056	119.363	19940.6	-53.3258	175205	221732	131.691	119193	4.81823	13.3824	405.841	18.105	39.7093	4.38607
550.436	97.8039	17277.5	31.4108	170047	223424	129.122	125955	7.82887	9.6567	515.693	24.7586	44.6103	12.2305
552.82	98.9219	18065.7	89.793	179544	206845	150.426	137830	-0.793993	12.951	315.078	27.052	40.3362	5.6492
555.204	115.772	16069.4	72.4369	179185	219576	105.63	119887	3.76339	12.5183	1305.22	34.1452	42.3713	-0.801248
557.588	88.9035	17219.3	70.4703	165143	231162	86.3499	121062	11.7696	5.99105	252.637	22.2247	37.8293	1.67027
559.968	110.991	18321.9	-0.669395	174161	224995	99.175	117014	-9.94437	23.996	563.246	24.3386	39.7155	-0.799515
562.352	103.345	16865.7	-0.634454	175194	222376	91.9675	121144	-6.30477	7.42289	471.785	17.1567	37.9944	3.04015
564.736	108.44	17924.7	37.3867	178671	219766	158.549	119272	21.5167	13.6622	461.844	23.779	39.011	3.07132
567.116	98.2445	17372.2	102.967	179564	218572	127.846	120166	-9.6258	12.8193	749.678	14.6175	36.993	9.40443
569.5	105.54	17667.2	4.3669	179404	225797	135.617	109006	-0.842761	10.6883	883.702	23.9363	40.1847	12.8361
571.884	123.241	18009.6	9.02477	168930	230502	136.381	115544	3.72705	6.51765	947.948	19.5654	39.1922	1.81506
574.264	115.565	15475	13.3919	167233	230168	147.123	121038	21.1223	10.2159	655.904	21.4439	32.5471	-2.02717
576.648	109.956	20834.5	-5.55892	180409	210624	134.879	127962	-5.42748	14.8718	720.792	23.2353	42.8978	-0.806799
579.032	100.746	20447.8	8.73611	169980	227398	120.335	116813	8.00138	6.31935	657.372	24.6649	45.1735	16.9204
581.416	111.501	18567.3	86.68	173151	224159	243.355	118735	-9.9147	13.5842	1072.98	20.3203	38.9596	0.513657
583.796	115.951	17062.4	33.1958	172533	220593	122.656	126795	17.3332	20.1583	843.729	26.4598	38.5822	5.73155
586.18	108.976	15526.1	39.8159	182518	212421	129.474	127723	-5.59046	-0.87229	412.989	25.3071	42.4089	7.36913
588.564	110.118	16112.7	37.9908	163606	233646	112.045	119807	-9.86401	12.0483	902.899	22.182	41.947	4.42286
590.944	100.198	18146.9	170.979	181863	214814	153.27	122070	3.78612	5.88433	613.068	28.5151	39.5869	-6.10285
593.328	121.119	17720.8	69.4077	175461	231998	118.342	105035	-0.776184	14.4966	525.591	22.0763	37.8842	18.7725
595.712	115.621	18257.9	-23.0444	180429	227028	125.705	105596	24.5869	8.83255	422.999	24.9449	37.1166	7.76814
598.096	107.034	18025.6	-15.2145	176171	227947	105.222	110245	3.76333	23.6878	367.535	27.019	35.7014	11.3758
600.476	91.2233	18875.3	13.3372	171719	223177	103.131	122420	31.87	6.27843	694.781	22.5662	36.4195	-3.26652
602.86	96.1778	18970.1	34.6604	182016	206696	86.6291	133670	28.7333	27.968	598.975	17.0111	47.1337	-0.827695
605.244	115.995	19224.8	34.0741	178506	220159	134.866	117644	-10.1253	16.9139	511.969	20.0815	41.0993	4.54063
607.624	117.94	17548.4	90.7284	171784	228240	129.322	115992	13.4466	8.42481	398.465	28.1396	40.0841	4.6505
610.008	118.557	18059.7	-10.3553	179515	210242	126.016	132231	-0.81208	14.8213	929.209	19.8059	35.8056	8.439
612.392	124.15	18095.9	14.3487	177064	218966	119.492	122802	3.84556	11.6836	190.217	24.9018	36.2549	13.9759
614.776	98.3558	15557.5	84.2941	164154	231382	129.34	123015	-0.783152	19.3327	881.705	27.4191	34.7473	4.32021
617.156	125.746	18723.5	66.3729	180981	216503	103.427	119982	-5.28247	23.9863	894.334	21.9743	35.8749	9.549
619.54	119.653	16146.1	122.741	182952	207684	136.287	133351	-0.890818	14.2305	737.084	19.5559	43.5471	3.4666
621.924	97.4542	17169.5	-24.579	172310	228379	119.301	115450	10.4835	16.7891	586.168	11.6596	36.7058	7.00363
624.304	103.732	16087.5	59.0097	159442	242371	126.182	112459	-11.5085	21.5848	487.403	27.2611	35.5736	7.90962
626.688	112.669	16829	-19.9583	173714	224306	123.701	120333	-6.49254	-0.0705123	335.432	20.7969	37.4369	8.37146
629.072	88.2301	18381.9	42.9906	189101	220366	160.264	104080	-0.803193	1.77541	244.788	30.115	44.6078	3.12754
631.456	114.248	17469	-20.0109	172934	222628	173.612	122757	-5.37083	12.5366	909.353	24.9823	31.5599	1.50069
633.836	107.408	16402.4	-0.564569	187244	208586	137.569	126013	3.89836	8.00856	818.39	23.8688	42.7344	7.34953
636.22	97.4101	19077.9	83.9687	181608	211415	88.715	127061	36.5102	3.72471	374.809	23.5215	37.3028	-0.815909
638.604	109.996	17151.9	-20.4269	176912	222294	137.747	118545	8.50295	-4.61077	574.816	21.4844	38.3691	-0.815293
640.984	103.951	17848.6	70.9857	168938	229207	134.841	117819	-9.7426	12.3017	758.701	14.7972	38.2931	-2.07062
643.368	113.92	19091.5	19.2776	175905	224361	117.993	114989	4.99247	16.564	388.894	22.0991	43.0648	0.525611
645.752	105.164	17236.9	-5.28248	175341	234598	121.372	101826	-0.790658	16.3032	507.314	22.5577	34.9349	6.30242
648.136	110.009	13843	38.6253	175770	226680	156.901	116577	-6.55326	20.8386	444.742	35.7659	32.195	14.7311
650.516	98.7532	16808.7	114.477	166432	228630	160.06	122993	10.4486	11.2692	777.091	16.1669	25.1967	-2.08033
652.9	116.412	17162.3	90.5536	183648	209199	146.371	129353	9.17505	13.0199	503.799	28.9971	34.5588	2.01692
655.284	103.472	15958	58.9798	174851	226760	99.9699	115450	10.8144	17.7173	711.995	21.4406	28.4771	7.22406
657.664	99.2824	15711.8	18.2984	165279	241650	168.529	105633	32.3122	13.2119	908.151	22.8745	40.6427	3.03845
660.048	104.854	20191.7	13.7667	176776	213966	147.094	128456	-17.5213	-4.76101	638.396	30.0682	35.6673	3.07304
662.432	103.18	16910	49.1268	173655	232358	100.401	107745	8.49796	20.0168	558.864	20.7932	33.3172	-0.814345
664.812	110.225	18549	57.0402	165212	230756	116.018	120121	-0.794069	7.99561	420.794	16.8278	36.1804	16.0511
667.196	104.704	16509.4	49.0818	173266	229797	115.057	112510	9.82418	18.5075	590.886	24.976	34.1903	15.0804
669.58	106.032	14183.4	-0.468887	163548	234906	89.005	120177	7.83657	9.3851	572.17	21.0369	35.5556	9.14348
671.964	113.107	15946.8	37.342	168567	228749	110.702	121185	12.5301	8.24997	414.878	23.4871	34.0133	1.77902
674.344	102.015	16574.1	58.1766	170864	232992	153.333	110802	3.77943	12.6335	565.412	25.1166	40.7623	9.76341
676.728	118.718	18422.2	122.983	168126	223985	115.17	125928	17.2575	10.5515	1089.61	15.9634	45.6142	10.275
679.112	111.394	16856.4	40.5356	187160	214961	149.965	115860	-0.848788	16.3877	847.729	14.5236	42.3168	0.544584
681.492	122.368	18792.3	-20.8843	167313	225395	143.469	125140	23.0758	8.90183	557.828	18.5789	44.5134	4.67157
683.876	90.1202	15889.7	88.4794	177464	214878	151.165	129913	-0.817535	5.24119	924.031	30.7535	42.2919	-0.810245
686.26	105.823	18476.1	-0.44755	183824	213488	84.4054	121201	10.2668	20.7861	792.505	21.6279	37.1767	3.04298
688.644	103.338	14161.5	46.9349	168455	235713	134.892	112147	3.32794	-3.30907	697.931	23.57	37.5906	5.10768
691.024	100.534	17115.7	13.3043	179097	220450	129.331	118517	15.3482	14.6256	458.187	15.4374	36.1366	1.72195
693.408	104.287	16708.1	156.685	155785	239769	136.386	120592	4.6579	9.84028	548.687	20.6076	39.9541	7.66895
695.792	104.308	17559.3	66.8876	179183	225181	120.419	110175	24.5282	16.7422	978.077	21.2255	38.2021	10.1737
698.172	88.4099	18912.5	25.661	168407	229067	107.282	117838	-0.717737	11.2373	731.058	18.7739	29.9026	7.49957
700.556	132.185	16840.2	68.9212	185553	214029	108.485	119556	10.0828	7.37977	706.511	28.765	35.2875	5.48581
702.94	101.709	16486	99.1168	177313	215944	100.789	128167	9.86802	8.94824	649.372	24.4701	37.3217	4.14687
705.324	122.587	16536.1	71.5655	180590	219198	136.517	118779	-9.8035	12.0587	569.903	25.3104	40.0205	4.39987
707.704	114.557	16923.1	-5.03976	175615	224421	128.778	117096	33.9557	4.21421	692.324	17.4813	39.1624	9.23466
710.088	118.958	18469.4	13.3411	180514	222191	116.468	112140	4.61864	17.1022	984.398	22.2932	41.828	-3.22607
712.472	111.297	18022.5	79.8096	171439	226039	133.817	119134	-0.779242	4.30301	706.533	23.6002	37.0589	-0.773227
714.852	110.722	16933.8	8.88699	166120	227579	119.494	125126	34.1039	10.2561	637.721	12.5177	37.9024	8.02048
717.236	116.132	17695.9	8.84308	180836	221200	142.876	114070	7.91672	1.04726	864.376	24.382	42.418	-2.00672
719.62	107.3	16735	-32.4723	179197	223412	163.432	114273	-11.5082	9.42415	458.74	16.0798	36.5906	-3.22627
722.004	109.565	16710.9	4.31787	185819	214773	137.491	118444	21.3398	12.21	501.02	17.8175	42.1971	6.22995
724.384	98.0478	16130.4	88.5261	177180	221851	114.87	119758	4.48134	10.1641	569.015	14.392	38.8186	-3.12953
726.768	121.179	18150.8	-19.7578	162625	235714	99.6741	116258	31.0083	19.9302	634.752	22.9001	38.4461	8.03417
729.152	109.912	16405.5	87.5333	183445	217859	136.601	117342	-5.10547	7.05224	305.333	26.9043	31.8558	10.4896
731.532	99.3343	17390.1	46.8389	164939	240730	84.3354	106275	-0.778721	7.19811	575.045	17.8477	41.0229	4.32784
733.916	107.56	17694.9	47.6254	166486	232950	141.825	115867	10.4755	23.7995	391.295	17.5018	39.4015	3.10483
736.3	104.179	16431	13.1344	177755	221746	129.507	118925	-4.96297	8.91782	561.742	27.3751	38.6846	0.478258
738.68	101.713	16494.2	93.923	175124	242368	86.2953	90860	-11.2753	8.21964	546.814	18.8014	35.655	4.4191
741.064	108.097	17060.5	63.3504	178364	227123	138.28	109261	-14.9848	22.9024	497.73	19.0517	39.9352	5.40007
743.448	90.0945	17655.5	23.3362	177948	223287	96.5726	115128	8.11816	5.78904	592.112	17.2794	38.484	6.90757
745.832	98.7119	17553.7	13.9876	170887	221134	151.508	128080	4.82825	10.2295	508.903	16.8009	35.9161	12.1494
748.212	103.944	18547.1	14.2255	170181	217492	127.052	133608	-9.92682	8.16413	576.965	27.6127	34.5429	7.08318
750.596	106.272	16491.5	46.2253	155676	248233	129.079	108127	-0.697078	0.976164	594.03	20.0131	33.5993	-2.97864
752.98	108.715	15342	170.809	171710	236136	131.261	106082	4.66465	14.8244	391.187	18.7399	43.4458	1.7415
755.36	104.384	17025.4	70.6435	171880	225046	105.638	121285	-5.22034	20.2177	444.2	24.3064	45.2766	1.78155
757.744	113.871	16590.2	13.93	174440	214746	124.455	133720	-11.9497	10.5367	815.609	16.0523	36.9527	5.6481
760.128	119.079	16001	139.989	169515	233646	139.315	112147	-5.16029	20.3469	497.091	12.6056	32.8229	12.5008
762.512	115.152	15320.3	119.125	176513	222079	109.112	120826	17.1525	-0.710326	774.505	8.3401	40.888	17.288
764.892	123.357	17054.9	39.617	188687	207862	104.92	124391	17.9322	25.9231	902.647	27.6956	38.5713	3.23042
767.276	99.8971	19166.2	108.867	179731	208338	94.7724	133582	17.0414	7.98475	1049.18	18.5893	35.4016	-0.777108
769.66	124.81	16833.9	84.8685	175975	224838	81.9665	116142	15.0433	5.15067	545.967	21.2078	36.3943	-4.36742
772.04	99.8514	17479.4	49.6703	174034	226430	132.018	115761	-14.962	11.1096	553.196	27.6532	36.2797	-3.19824
774.424	108.791	16360.7	99.0233	173288	222715	136.332	123456	-0.778293	-0.335145	532.008	20.45	39.8572	10.7269
776.808	108.595	16707.4	-32.1825	160584	233711	154.768	123757	-0.749102	13.5692	342.637	30.1892	36.7653	12.7865
779.192	98.2612	19122.1	18.9037	185603	212241	121.094	120210	-9.8103	15.0512	629.755	22.7279	35.4102	13.4915
781.572	102.906	17316	36.0361	171409	225916	114.249	120101	29.0936	4.18596	693.841	22.0988	37.8657	-0.129856
783.956	119.129	16518.3	13.7828	181655	215863	114.153	122517	25.6666	5.40091	557.021	28.8932	43.0643	10.6453
786.34	113.415	14936.1	51.4508	173881	223385	99.0507	122968	27.6142	9.56349	618.439	23.8988	38.5952	-0.12319
788.72	91.2992	15668.9	108.198	182623	221054	70.8461	114052	-5.80303	23.5205	608.898	19.3429	40.368	-0.7099
791.104	99.5576	16816.1	29.5955	164873	237774	102.957	111493	3.30291	13.6966	506.124	17.8617	38.5683	7.36852
793.488	122.295	16691.3	47.7581	159460	239578	116.866	115968	30.0192	8.69278	612.81	22.4305	35.8264	8.72138
795.872	108.192	16499.6	67.549	177581	218908	112.261	123383	4.56118	6.24301	550.375	17.0884	42.8604	1.70272
798.252	93.7696	18103.7	22.4649	177138	221771	79.7572	117974	9.92335	5.24034	751.045	17.8059	37.5117	4.16954
800.636	100.162	16876.2	50.0577	183510	211050	125.475	127146	-5.04528	0.0407847	457.587	24.2759	48.2028	-3.21997
803.02	120.384	16224	37.6917	172251	228657	95.0439	116123	-15.6211	2.21424	415.661	17.2881	38.5059	6.91271
805.4	124.595	20098.4	97.6061	173332	219171	89.0437	125439	10.6787	11.6153	292.204	14.5136	37.9974	5.80874
807.784	112.657	16550.1	80.3363	181071	215265	140.434	124270	-0.77836	16.6765	400.698	18.5629	43.9034	10.7501
810.168	85.0004	16702.9	16.6696	175520	227865	103.806	112413	4.26476	14.8676	501.373	21.7099	38.9538	3.87534
812.548	126.177	19662.1	47.0081	185512	210184	124.359	122718	4.06845	15.6789	786.092	17.006	54.4281	-0.85924
814.932	102.304	16431	-57.6495	173759	228892	143.349	113529	9.63626	7.45509	482.692	14.8928	38.5598	11.2053
817.316	130.064	18210.2	-40.2017	171063	229711	132.582	113910	8.55091	20.2298	731.388	15.4811	42.7122	4.57701
819.7	119.423	18422.1	44.7209	151508	249871	118.97	109516	-9.17585	3.82319	435.636	23.0907	41.2333	10.1934
822.08	110.212	17506	23.4592	165938	238251	143.813	108520	15.9036	-2.47346	591.586	23.5395	44.3063	17.148
824.464	109.592	15570.9	-28.0003	182789	219381	133.327	116678	7.92874	11.3497	462.815	22.5162	40.2123	7.99444
826.848	111.885	18209.2	9.44033	170489	216592	164.929	134702	-0.794796	20.7582	725.165	18.9763	40.4052	4.77154
829.228	93.1112	16338.5	85.9255	159424	251073	125.689	98919.7	-6.06246	14.9242	495.547	21.4415	35.2033	9.05603
831.612	105.439	15612.7	-14.1388	178607	222013	164.922	117937	25.3453	3.94937	765.462	21.9245	35.7908	7.69431
833.996	115.924	20068.4	-14.9277	182729	211897	148.404	123606	16.428	24.7066	686.876	20.4956	37.7962	8.12568
836.38	95.2826	14487.8	-26.5328	168212	230991	129.271	119689	9.57148	8.08688	465.712	16.5754	30.7722	9.94454
838.76	103.424	19779.6	24.4477	179817	206994	172.891	135032	57.0743	20.0106	906.458	10.6153	38.3078	1.52566
841.144	105.464	17399.5	-9.93684	180135	218117	121.895	119941	-0.795314	5.99274	1012.25	25.5914	39.8257	1.82886
843.528	104.208	15525.2	137.255	180540	216901	142.847	123267	7.84921	19.6323	571.726	17.9379	31.9444	-0.74888
845.908	113.327	19200.8	109.751	175897	215105	118.293	128780	5.28558	8.86377	572.279	26.8959	37.4329	0.558515
848.292	93.6954	16213.1	4.41973	164225	236552	136.254	114675	-0.756501	10.6388	691.012	20.5917	36.4758	-6.36984
850.676	92.8302	14538.1	45.576	173978	229348	136.382	113966	-0.749406	-3.41772	826.603	17.9179	35.9373	7.90552
853.06	81.6014	16256.8	32.477	181161	226647	135.644	106883	-17.193	20.0098	712.785	18.2749	40.1444	-5.8063
855.44	97.8258	16303.5	91.4448	184035	213314	91.0678	123258	3.73698	15.8936	706.532	24.1158	34.4757	8.33082
857.824	87.8495	15296.4	32.9035	161518	227538	122.829	133009	10.3171	8.3683	633.768	26.2017	36.4922	4.33462
860.208	111.274	16375.7	37.4111	179469	219855	134.729	119547	-0.768965	7.96306	528.005	22.2208	32.7632	-0.767842
862.588	115.072	16607.4	126.366	177383	220592	92.3399	120889	20.4665	8.00389	563.869	15.8521	36.2787	-5.62083
864.972	105.479	19871.7	-4.89367	169372	228533	86.3931	116677	-0.770129	20.5448	470.528	25.4552	40.0695	0.502353
867.356	122.911	17402	101.527	187687	214243	148.075	115556	4.88932	4.88821	934.659	16.3312	42.9278	-2.09936
869.74	102.147	17324.8	-24.8376	168529	225179	123.638	125108	3.82256	16.2652	783.656	17.9715	38.5125	5.85564
872.12	123.02	18331.4	4.5979	179210	222751	110.761	113571	-5.25392	7.72428	580.013	21.2505	37.2234	14.3517
874.504	92.9913	18641.4	50.0909	171876	226657	97.5766	117411	-0.82179	15.8099	346.503	19.6764	39.9081	8.6821
876.888	117.427	14020.9	137.724	170185	232088	130.333	115266	-0.77717	3.35413	799.507	19.9006	31.891	19.7686
879.268	98.3696	16738.3	28.1176	163737	232243	119.575	121495	21.3383	13.7441	543.942	13.9695	41.5525	4.32063
881.652	122.492	18441.2	57.3771	166446	233485	172.89	113838	-6.4078	20.5684	940.083	20.0687	41.2286	3.1017
884.036	117.555	19597	38.4463	170983	225887	143.838	118486	4.87248	9.29633	691.777	26.7474	44.8937	3.12198
886.42	120.89	18341.2	73.2706	178271	216178	145.189	124323	17.5731	6.07142	1035.55	29.1182	39.0734	6.47119
888.8	116.968	18004.6	-19.9836	185394	214491	150.252	118464	41.0587	14.8452	203.299	18.7317	39.1377	-0.140116
891.184	87.9811	16202.8	159.361	161631	241742	94.0438	110141	3.43396	-3.95891	662.531	16.7403	36.9265	6.45569
893.568	100.436	15650.3	102.977	166772	227772	105.727	125104	17.6305	18.0778	642.924	19.8881	37.4724	9.8078
895.948	113.13	17510.6	-36.1912	177163	205879	107.252	142821	13.6485	29.5441	737.637	20.844	34.9724	-8.83254
898.332	112.897	18480.1	87.3124	173739	214022	78.5668	134290	7.88673	27.8272	359.979	16.7674	37.146	-0.751459
900.716	102.96	14102.3	27.0246	162898	245979	116.845	104154	24.747	5.27862	550.475	25.6993	36.5318	2.92838
903.096	114.384	17367.9	147.847	188262	202507	101.028	133022	5.33701	16.2399	626.349	23.5543	41.7248	0.564531
905.48	106.711	18036.5	117.732	183124	209465	99.5127	128342	8.41616	10.5991	1054.21	15.2256	38.5571	3.17742
907.864	107.352	16663.4	14.2996	177324	219001	114.176	123264	3.72835	10.7468	793.677	15.5614	41.1398	6.35844
910.248	101.009	16112.1	28.3322	172036	229225	112.821	115682	-0.773433	18.5507	370.726	25.6344	36.5975	4.3481
912.628	77.9018	15483	53.1027	181502	219501	115.233	118107	11.7607	-1.92106	676.775	12.5441	35.7893	11.2524
915.012	115.58	16839	85.29	179280	215549	106.575	125814	-0.773719	20.0143	606.382	12.1338	39.5437	6.91376
917.396	112.176	16553.1	57.1503	177199	223305	169.747	117141	4.81855	30.3154	447.026	29.0319	39.7646	8.24095
919.776	111.197	15825.7	-9.66601	174104	217565	152.314	130842	10.4372	8.86836	536.928	13.5245	43.0033	-2.07157
922.16	105.83	16607.7	36.8549	174547	218288	119.844	128152	20.9144	-0.93895	762.016	18.2322	34.0193	7.9764
924.544	104.086	18166.2	56.4987	172345	225005	145.39	119619	-0.768695	5.51636	456.474	13.9812	41.7989	-4.9095
926.928	93.6651	16552.2	23.3012	192049	206773	116.987	122197	12.402	6.54013	786.118	18.3015	38.5606	-0.131628
929.308	103.893	20929.9	9.33303	178110	216896	154.034	121389	8.06828	10.1758	689.199	15.8706	35.3013	0.50321
931.692	98.5683	17158.4	56.3393	178703	219668	102.264	119963	-17.3105	23.0692	702.895	22.2291	48.0765	9.3907
934.076	103.928	15419.4	-0.0771294	163696	232116	113.515	123242	-4.85023	13.5523	371.612	19.627	40.5807	-7.55779
936.456	97.0204	17645	60.3344	171733	229037	148.241	114709	15.4875	11.3006	510.992	11.6149	32.1538	10.9448
938.84	102.967	17735.2	96.6287	155912	234156	112.667	127898	32.2791	9.84016	752.463	20.1826	36.0505	-3.09099
941.224	104.149	16345.6	-4.39201	182724	220407	84.4568	114299	9.46512	9.37775	661.545	21.6732	37.4683	1.63445
943.608	126.397	17570.5	97.9673	173077	224454	143.803	119994	10.19	11.877	393.755	14.4681	41.5691	5.54124
945.988	105.235	16194.2	28.4294	165678	235726	113.82	113512	-5.23049	22.5934	1166.74	19.2345	40.8416	6.28064
948.372	112.712	16061.3	107.488	199305	205961	135.261	114609	-0.760853	16.5347	89.9417	25.2757	36.4975	1.44699
950.756	90.5955	18510.3	-19.1137	182445	213692	144.731	123049	-9.71791	18.6705	461.054	16.7101	30.7001	6.30033
953.136	118.752	18685.1	87.6919	172513	220151	111.518	125872	-0.792985	15.3821	879.751	27.012	39.3361	-0.136821
955.52	119.599	16468.9	42.942	177805	223007	97.4267	116521	12.6678	17.6233	921.206	12.2117	30.1395	1.47819
957.904	101.011	17520.7	82.8746	188017	210369	116.225	121248	8.35986	18.3701	638.225	19.7484	44.0774	5.79016
960.288	77.101	18030.7	51.2176	171315	226367	108.046	119042	15.635	16.1275	522.915	17.5989	37.7992	3.01447
962.668	116.621	17634.2	-43.5675	179309	214710	147.523	126410	10.5615	2.36324	603.003	20.2446	35.8461	8.35573
965.052	129.16	17571.7	96.9777	174676	224643	123.507	117482	3.96089	10.2811	493.968	21.3657	38.0576	-6.34773
967.436	88.262	18011.1	-5.05657	170302	234881	106.329	107461	36.8938	15.0978	501.55	13.5255	36.3408	3.25073
969.816	96.2217	17394.8	68.2612	169346	238158	138.878	104050	-6.07947	0.839542	736.855	18.4326	40.7413	0.487135
972.2	97.925	18185.6	67.8399	173219	221880	136.095	123117	4.89782	9.76614	529.009	21.6016	41.4611	-4.71729
974.584	102.759	14201.3	47.6467	177614	224909	138.094	116094	-0.774317	20.5055	860.088	24.4696	41.6045	-3.35111
976.964	108.524	18651.3	46.19	185935	207956	106.734	126649	13.6193	9.17355	703.611	23.5747	34.2058	3.32259
979.348	127.434	16841.1	9.57521	177250	228975	183.789	107951	4.84617	5.64397	701.837	22.0214	36.8025	-2.07689
981.732	112.512	16732.7	-56.197	169591	225570	143.205	124005	-9.54945	14.0829	423.921	21.5045	40.6763	-5.82223
984.116	111.997	17983.5	-4.65114	186457	206901	141.383	128375	-13.8311	10.075	579.021	20.7004	33.4004	5.51523
986.496	106.192	17295.3	77.903	178432	217102	167.234	123800	-9.34296	20.7706	940.579	24.1478	42.4168	15.3392
988.88	98.8988	15391.2	35.2965	163212	236210	88.9797	117358	15.847	11.9288	659.477	16.0712	34.6398	6.43101
991.264	111.144	16501.3	92.5268	168966	232349	113.285	114473	-5.09175	24.1475	476.112	28.1457	47.0989	9.24041
993.644	104.413	17844.7	55.2833	173687	227457	123.338	113808	-6.1506	14.9134	1074.13	21.1518	40.6171	-0.128741
996.028	96.9245	17292.3	17.717	185187	223610	142.251	104728	-4.87047	9.26842	1100.45	13.1144	32.4011	-0.721174
998.412	90.1012	16844.1	53.3114	178621	219250	140.112	120842	3.4466	19.4599	870.216	19.7874	32.5155	5.27259
1000.8	97.6925	18087.5	-19.5652	173810	232818	130.944	105890	-0.794323	8.39095	443.213	21.82	33.9166	-1.78981
1003.18	103.297	18218.1	64.0715	174476	216758	131.254	128923	28.0916	-4.70265	827.793	21.283	41.0529	7.17928
1005.56	110.926	18960.2	94.4341	175231	217421	151.639	126192	31.8272	19.882	711.511	30.9029	38.343	-4.83446
1007.94	104.742	16605.5	54.5444	176345	218039	107.212	126049	-0.803357	12.2735	817.198	25.4387	43.9067	4.54499
1010.32	99.391	16919.7	134.397	177065	233218	151.259	101720	-12.0337	8.22791	538.357	29.5195	35.5536	1.80977
1012.71	116.135	16208.7	19.3191	176180	220428	163.829	122899	-6.43017	18.5446	898.921	14.9266	41.6213	21.3274
1015.09	97.5676	15275	145.993	164290	236042	158.984	116189	9.95912	-2.95478	568.276	14.7516	38.6055	-0.742939
1017.48	135.119	16371.9	123.163	168364	229624	139.524	119511	20.6544	15.8211	426.698	22.1728	41.0063	11.5709
1019.86	109.685	17567.8	65.8348	172999	222612	115.056	122407	10.2595	28.8411	1037.03	17.7455	32.9502	3.04076
1022.24	102.24	15513.5	0.051559	190593	212578	140.537	116595	10.4362	14.3979	447.227	21.2925	34.1479	-4.64994
1024.62	112.718	15049.9	-4.61993	176508	225631	122.642	116036	-0.757148	18.7201	509.973	23.3668	44.096	10.6002
1027	111.041	17074.3	71.4137	160979	223972	142.31	137484	21.5431	22.3112	504.044	17.9642	38.1678	-1.73785
1029.39	103.347	17294.6	-4.62822	186738	213030	123.807	119196	15.7765	7.71546	687.543	12.0136	31.7226	0.503741
1031.77	105.249	16730.6	99.07	170133	234160	99.3929	109915	8.08263	-2.32567	514.14	14.6064	42.1811	3.05099
1034.16	116.071	16310.2	0.0813213	171364	222625	129.612	125783	-12.2877	17.386	1142.36	23.1614	40.4013	12.4342
1036.54	110.785	17086.2	83.1597	169997	224723	113.027	124131	4.94109	15.4789	548.19	17.1328	46.3123	7.12247
1038.92	94.6559	15516	56.2983	176265	226771	106.056	114294	4.7364	11.6235	365.666	16.4226	34.2974	5.56228
1041.3	104.51	16171.4	28.8135	177459	223985	114.389	116119	16.0782	2.75677	566.963	20.0398	34.4337	14.7408
1043.68	107.388	17945.7	82.1682	188074	211441	115.086	119271	17.3381	15.6637	466.613	21.5085	35.7686	5.73219
1046.07	109.458	18268.9	-19.3663	172269	227023	137.246	116442	12.9074	3.54462	621.125	23.6545	39.6819	8.40389
1048.45	106.571	15350.3	39.4764	170383	223808	116.15	126736	-0.796056	4.33827	582.612	17.9238	33.6561	1.52479
1050.84	143.646	17249.7	95.9547	166328	231081	141.909	119141	-0.774914	5.32147	537.466	27.8556	34.8752	8.2787
1053.22	105.95	15475.8	70.4724	168546	232494	125.182	115904	-0.758452	5.92635	438.874	14.5361	30.8377	5.57041
1055.6	103.477	18326.6	75.6779	167078	234757	122.09	111428	10.3172	-1.59627	705.642	21.0467	35.6226	-4.91461
1057.98	108.512	18098.3	-19.1081	180418	213032	116.315	127222	-0.776546	10.1027	419.632	18.1463	38.1336	-0.782058
1060.36	102.037	15867.6	37.8139	168066	230475	159.06	119160	-0.761597	18.5363	543.168	22.5965	38.2341	1.77819
1062.75	118.788	19027.4	-44.8409	183524	217456	118.033	114970	8.56892	8.22416	854.799	18.1925	39.2161	1.88521
1065.13	121.804	17199	5.13807	180808	210888	129.237	130493	-5.51658	10.9338	718.046	27.1106	37.8239	11.7122
1067.51	105.703	16949.4	70.0723	177548	221698	97.9098	118609	15.6526	11.2319	667.444	28.9969	44.7986	-4.53596
1069.9	99.3486	18598	62.9999	180404	214049	151.026	124675	-6.45176	17.5481	857.113	24.1657	41.9898	7.04694
1072.28	110.55	17909.7	70.6371	186153	213397	136.8	118662	10.2666	0.932229	745.743	27.3201	36.271	1.7736
1074.66	93.414	16089	13.3837	174466	229046	92.618	112907	-4.8591	10.3133	207.706	19.0846	40.1195	5.24658
1077.04	121.691	16779.4	43.2854	184036	219996	141.198	112692	10.4695	28.3652	537.443	23.3066	39.0953	8.28011
1079.43	128.138	16978.4	99.4274	175766	224784	146.506	116329	45.7752	14.2371	433.439	26.158	46.6019	4.55407
1081.81	98.4811	16525.9	85.7069	184725	213607	161.092	121835	-15.6337	1.6733	503.489	20.5311	37.7256	8.2115
1084.19	91.9358	16775.2	42.3315	179214	221928	105.321	116348	12.4376	17.0202	525.544	17.0659	46.4782	11.8945
1086.58	109.316	14444.6	26.7883	173479	225163	132.194	121312	-11.1294	17.4755	621.626	17.9696	33.8652	6.47021
1088.96	95.0125	16220.6	51.0299	172140	232544	122.766	110140	-9.42271	12.2097	590.113	22.9525	36.0865	21.722
1091.34	107.544	15973.6	66.8139	173763	222042	128.336	124240	26.0367	11.486	519.077	22.503	36.9502	1.47545
1093.72	106.029	17252.8	19.0035	175649	221052	138.488	121861	-0.759853	-1.56716	747.511	16.1962	33.8724	8.13999
1096.11	98.8122	17546.2	-75.2244	190166	212391	117.671	115672	8.08132	11.7266	382.047	9.802	43.1925	6.86677
1098.49	112.917	20853.8	14.3196	166300	226293	105.15	123225	-11.8211	9.94048	528.629	22.2858	32.239	10.6927
1100.87	115.787	18558.8	38.8697	179570	220600	138.331	115923	-5.31625	4.66518	781.989	14.98	40.5009	9.65893
1103.26	121.287	15825.6	123.969	170379	230175	93.201	116159	-0.767304	13.6688	873.309	21.2089	36.737	6.93922
1105.64	134.346	17924.2	-4.66983	167613	229824	62.7245	118587	-0.782004	10.235	860.069	17.6678	38.3001	5.76284
1108.02	107.106	16581.3	0.187379	175843	220322	159.111	123421	22.1474	23.3611	623.81	19.1251	39.4436	8.44574
1110.4	112.788	14859.1	68.8855	177990	220529	106.534	121802	-0.7378	7.567	683.843	21.645	39.1675	11.6223
1112.79	95.4772	17734.2	-13.6945	177011	211669	88.3512	133936	-5.08664	6.23459	820.034	16.2174	36.5179	4.24528
1115.17	105.481	13627.9	68.6731	169676	234614	102.388	112721	-9.96455	10.6931	669.524	20.458	38.5964	8.44854
1117.55	100.147	16920.9	5.00118	189828	214509	134.446	113269	-5.26997	8.29139	522.51	14.2007	39.3108	6.98753
1119.94	77.2917	15372.8	9.59834	170047	231698	90.3471	115192	3.64669	19.2072	569.507	20.2631	39.2969	3.03784
1122.32	96.3534	19056.9	24.0479	175008	226869	133.502	112091	3.70571	15.8826	726.572	23.1777	43.7059	8.23627
1124.7	101.79	15954.9	63.5312	174171	230859	125.119	110184	-6.03296	15.4157	619.24	17.0805	39.0806	5.37155
1127.08	115.531	16805.6	-80.3697	171157	232168	139.836	111635	-0.762813	10.0119	531.294	24.3325	44.7068	9.46907
1129.47	116.425	16700.1	28.3	177529	218471	144.617	124080	10.2224	4.53188	379.266	20.8427	37.3388	10.6103
1131.85	101.29	15742	0.211741	174846	224374	134.294	119459	3.58003	11.4859	616.073	19.8892	33.1042	6.71256
1134.23	114.132	16449.2	54.008	163358	236233	129.681	116035	16.409	10.327	623.463	29.0647	37.2787	19
1136.62	120.004	17836	-9.51254	173903	227410	145.045	114002	16.3607	30.3647	621.643	23.6886	38.8837	3.15525
1139	110.268	17025.6	61.619	183747	218289	182.795	115199	4.77832	22.583	792.73	15.9071	34.7706	13.2569
1141.38	107.807	14638.5	77.1517	158480	246095	115.39	109225	9.33851	7.40695	717.605	24.8395	31.4758	6.23013
1143.76	114.07	17312.8	80.3618	189682	214629	124.661	112630	34.6175	30.0925	630.419	16.517	42.3757	8.14217
1146.15	107.992	15198.9	37.3662	190265	209571	214.331	121816	-0.745949	14.4145	448.103	23.8208	46.2189	0.499
1148.53	108.246	16686	164.426	173286	230275	130.211	111077	15.5209	22.9768	980.035	23.3515	34.2881	-4.20201
1150.91	110.244	17186.2	90.2693	165342	229448	131.75	123081	-14.0966	0.628516	574.939	24.9613	36.1388	12.6624
1153.3	101.114	15215.9	78.7042	169891	227457	158.849	121489	-0.741423	5.89203	1003.77	23.0618	34.3894	-8.22634
1155.68	102.098	17477.7	28.5543	173110	236317	166.726	101761	-5.18058	-2.2476	703.71	20.9994	33.4728	-11.268
1158.06	95.7214	16439	170.909	181283	219544	137.194	117172	20.3441	13.612	698.102	23.658	40.7696	10.1828
1160.44	109.195	14982.5	31.51	175507	224375	132.411	119071	9.75458	12.5133	790.989	19.2794	39.9433	8.91825
1162.83	119.641	15433.2	-9.28232	167944	229337	148.547	121478	-9.7275	0.277351	609.118	37.4731	41.2549	-5.93336
1165.21	98.5182	16123.6	39.2128	163775	234492	91.2213	118619	-0.694875	3.55368	578.913	15.7557	37.0134	-1.57964
1167.59	103.339	18495.3	-4.23131	171323	224043	125.646	121829	4.54497	20.465	879.009	16.3434	37.2093	4.12
1169.98	108.452	19010	85.1077	174165	213581	136.333	133853	3.66474	12.8546	352.549	22.906	38.2214	5.59621
1172.36	97.5441	18759.2	-13.1841	171894	221537	107.095	124678	11.9081	6.08229	878.324	13.2871	39.3514	1.69414
1174.74	120.263	15794.6	5.06138	166868	225196	180.611	129002	-5.23812	9.00966	460.199	21.8826	38.0439	1.47853
1177.12	96.0457	15740	18.5225	162017	244857	195.883	105105	-5.00978	9.66239	949.274	16.5981	36.3854	6.64692
1179.51	94.757	19872.9	28.4192	164722	242121	169.256	101726	15.7411	20.3008	845.014	11.9747	38.0236	13.1618
1181.89	111.729	15844.3	50.3562	166468	231832	122.751	119305	16.3529	12.0784	495.793	16.4142	33.118	4.1771
1184.27	113.522	17345	66.9142	162571	243997	96.605	104577	-0.712027	5.68822	469.912	10.7406	34.6514	1.67694
1186.66	115.284	15854.2	-42.7147	171203	222806	94.5149	126738	8.20199	19.2442	579.851	25.1794	43.3913	4.38589
1189.04	113.154	18901.8	-31.8585	165527	229110	160.462	122000	-6.12414	9.04117	372.143	12.9815	36.4552	0.494527
1191.42	111.213	15422.9	72.2673	173446	231787	190.209	109997	3.73127	10.1719	805.019	18.1086	36.5833	6.99159
1193.8	100.926	19274.8	144.387	174448	221493	107.914	120749	13.6545	19.1483	703.846	13.8377	42.4032	3.33172
1196.19	116.313	16477.9	-4.14057	162070	231650	124.223	124930	14.9306	27.7418	511.782	14.3733	35.2814	16.3854
1198.57	125.896	18212.5	72.0429	177750	212385	144.05	131399	26.1494	20.7186	535.521	18.7003	40.0434	-4.64914
1200.95	115.114	18828.8	79.2098	180958	222758	217.082	110557	10.7702	3.69468	567.261	17.9379	42.5757	0.530691
1203.34	111.642	17163.4	-4.34541	166000	227782	152.119	124942	25.5826	21.3425	422.331	16.3906	40.6156	-0.75927
1205.72	106.934	16006.6	87.9597	175486	221221	137.166	123001	12.2416	14.7132	645.233	18.0364	36.3911	9.21283
1208.1	122.273	16682.3	47.8584	177297	223433	165.647	116649	8.15424	27.4773	502.619	13.4242	35.8192	9.49131
1210.48	86.1168	17670.7	0.358548	165097	235677	227.496	113270	3.81113	13.0147	776.373	18.4909	43.8194	4.49486
1212.87	95.8603	14827.9	51.0382	159437	242518	216.338	113230	7.25488	5.43164	683.145	12.5166	32.9828	3.87916
1215.25	121.985	18410.1	63.2253	179776	213249	162.165	126924	16.2387	12.1145	796.484	20.8798	39.6459	3.1321
1217.63	97.1294	16235.5	33.4291	164710	230669	151.67	123117	15.8682	12.9212	470.502	21.6867	34.169	0.509036
1220.02	82.2218	18177	5.07205	167809	227725	111.001	121573	-15.5221	6.07291	602.016	17.1852	42.4512	3.05852
1222.4	102.559	16924.3	20.0088	176501	217001	181.515	127130	13.0295	20.1618	777.989	10.5377	37.8669	1.85406
1224.78	107.024	15518.3	-8.56597	171470	231555	131.914	113259	-4.88916	6.06835	622.845	19.8286	32.3906	14.9051
1227.16	102.9	15370.8	0.375581	171102	226547	142.414	121362	-0.784287	5.93815	807.791	23.8404	37.1911	11.1223
1229.55	94.7829	18418.1	61.2703	192618	207263	173.52	118862	-0.810956	5.36888	709.525	20.524	45.8222	4.65494
1231.93	96.8226	18377.3	41.9078	165891	232280	125.558	117218	-5.06734	15.7956	259.089	23.6845	33.1672	9.21938
1234.31	111.868	19868.3	20.5895	182179	204157	165.634	136142	32.3317	9.96246	877.955	23.8415	40.2595	3.26863
1236.7	97.1066	17229.9	133.366	190912	206205	145.236	124193	17.8566	13.3372	315.003	25.8436	39.3831	10.6222
1239.08	112.34	14782.3	38.5942	157661	237725	131.858	123295	-17.5603	9.79192	445.722	24.5032	32.8442	4.38191
1241.46	110.731	18772.5	74.0289	179800	212543	152.508	128245	36.146	14.3925	115.702	16.2766	39.1647	-5.1102
1243.84	107.047	15555.6	67.1704	161705	239022	127.662	114994	24.355	7.09823	498.537	15.6015	41.9916	-0.722238
1246.23	105.666	16587.9	61.4222	168810	219600	151.155	133892	-0.749714	1.04257	758.441	15.1718	38.6897	-3.29601
1248.61	107.813	17231.1	54.5379	170736	231343	160.154	112442	22.2908	11.2217	993.244	19.9067	38.1678	12.4844
1250.99	103.39	16008.5	-69.4166	171120	231508	153.975	113244	13.2428	7.95841	759.577	26.2763	39.3589	-5.18595
1253.38	119.645	15134.3	15.148	174247	222898	144.688	123141	10.7269	8.95335	518.976	17.1936	35.0549	3.17923
1255.76	116.388	16742.9	113.797	183959	221176	176.173	111133	26.9562	7.49019	307.139	26.6308	43.2236	1.5295
1258.14	100.605	16855.1	49.9371	178767	214324	156.512	128613	9.84312	9.24858	364.425	13.3324	35.5324	1.70147
1260.52	108.124	18657.9	5.35255	171654	225283	172.066	119144	22.2682	9.71945	992.132	25.2189	40.9371	3.1837
1262.91	105.767	19946.6	38.5982	166898	228448	146.651	119882	10.4274	23.2607	563.559	20.5963	31.1369	0.514535
1265.29	101.872	18986.5	15.7708	184980	211727	213.952	121751	-10.389	7.76115	792.782	25.4958	38.9177	-0.82732
1267.67	109.492	17039.4	50.8799	165238	237571	132.164	111027	7.8749	4.17935	513.384	21.0486	41.8405	-0.743612
1270.06	107.37	15380.8	-9.03889	182122	221611	208.208	114219	21.4503	16.588	500.454	19.1544	40.6821	5.62296
1272.44	92.8551	17124.1	68.456	171529	228612	121.694	116250	-0.723185	10.3612	423.249	17.7352	43.5647	0.489319
1274.82	96.1563	17762.9	64.3381	177835	228817	142.443	106784	7.83611	16.6956	411.736	14.7507	37.8187	7.88605
1277.2	135.869	16293.2	54.0933	166276	229963	127.98	121785	3.79727	15.2329	681.842	11.7889	37.83	1.84263
1279.59	111.083	15497.7	4.94757	172920	222982	184.697	124259	20.4318	6.86576	700.426	23.7508	34.7836	7.48639
1281.97	95.2079	17320.8	18.4256	186666	214971	178.995	116231	20.3953	13.7206	671.247	16.99	33.3349	5.34642
1284.35	99.5812	18644.9	63.3147	165381	230636	167.025	119788	13.3291	2.04887	586.233	16.3427	37.2133	11.3977
1286.74	111.229	16429.8	31.5528	149707	238097	221.548	131845	33.1603	13.4107	338.406	28.662	36.9623	-0.140056
1289.12	119.252	17198.7	14.2216	170416	227733	212.831	118995	20.7875	28.6813	356.865	19.1837	29.9409	6.06852
1291.5	121.506	16798.5	-4.12894	172320	219168	228.901	130044	10.0215	6.98777	242.831	22.9038	31.331	2.97016
1293.88	105.05	19395.2	71.269	177781	218160	235.795	121151	8.10385	12.2351	762.381	25.5016	40.5586	0.509484
1296.27	109.328	16712.2	5.53286	176403	220815	183.555	121680	5.09458	3.44983	749.651	23.0676	36.7883	4.61422
1298.65	117.917	15612.9	5.1648	169323	231571	205.536	116035	-6.24539	14.3062	524.742	22.1543	38.0292	0.506266
1301.03	84.6849	19266.6	-9.22601	178105	225223	143.276	110569	27.7343	24.4735	378.173	16.372	43.7073	0.524963
1303.42	104.029	18620.8	123.475	168697	222918	176.938	127372	-0.782579	7.12923	260.49	16.5589	36.2044	-4.77968
1305.8	116.283	17565.5	-56.7329	172409	219698	148.755	128381	23.5836	1.59382	372.457	21.0551	42.8919	-1.89688
1308.18	99.7077	15280	-26.8154	156653	242724	183.619	116419	16.3463	10.4142	579.523	16.5517	48.094	1.41233
1310.56	96.5069	14893.7	111.406	168707	237256	168.099	108773	-11.1126	12.5275	579.07	13.7367	33.2525	4.07311
1312.95	103.413	18199.1	84.7667	167485	227732	197.86	121798	-17.2142	15.3615	567.393	22.1175	39.8184	6.82527
1315.33	105.612	17809.2	-8.96593	165253	225836	156.558	128072	8.11667	14.4295	719.431	13.9909	37.9147	1.78661
1317.71	108.969	19078.6	40.6165	180083	217805	296.038	119147	28.579	0.778875	451.768	11.4307	43.2739	6.62796
1320.1	106.624	14224.3	63.4664	168555	224537	136.057	128991	7.72473	9.2771	712.549	15.1459	40.6331	0.485926
1322.48	106.31	18057.9	72.9995	188880	214971	215.824	112660	17.3613	4.43798	420.607	20.2006	37.0541	-0.130231
1324.86	104.864	18053.1	70.656	175487	226653	136.599	112807	-0.742999	21.0546	581.015	19.5496	46.5498	8.07845
1327.24	89.3094	16882.9	84.763	168078	226014	117.473	124964	-0.704749	17.9452	578.738	11.9243	37.3329	1.37728
1329.63	98.3408	18945.5	161.926	177683	214181	145.979	127793	-0.732619	19.01	773.325	13.0234	34.7584	-0.746685
1332.01	104.447	17192.5	0.514775	181286	217548	137.71	119871	-5.03186	12.2656	541.599	18.5567	33.9714	7.92607
1334.39	111.932	20397.1	9.73259	164272	219874	174.723	136178	15.4735	12.6692	486.68	15.5095	30.4677	9.20315
1336.78	110.451	18528.3	107.669	187581	210205	208.167	121041	-0.773166	22.3043	605.035	15.0714	32.6315	11.0418
1339.16	115.833	16513.9	0.536449	174217	229000	148.395	112448	-5.22876	5.84272	636.704	17.3433	45.3647	3.08909
1341.54	102.475	16548.3	141.899	165529	230605	152.312	121845	13.9845	18.351	278.557	15.8635	36.7547	1.78116
1343.92	88.4129	20348.3	30.1486	178224	210813	174.62	131340	-6.56547	18.4591	413.922	17.9415	38.6884	-3.46096
1346.31	131.618	17986.4	44.7091	174648	226470	192.371	114316	10.7191	11.9958	487.532	21.1629	39.7536	0.529946
1348.69	116.647	16627.4	55.4587	162060	234491	124.333	120295	7.85995	14.6897	625.392	22.2384	45.16	4.20116
1351.07	102.485	18901.5	19.8682	174019	222125	185.999	120875	10.5496	11.809	629.399	20.8264	44.2162	-0.780898
1353.46	101.555	17932.4	-4.34205	169844	223038	199.671	126258	17.6761	29.6699	397.539	17.2267	42.0478	3.18751
1355.84	110.698	16744.1	66.3391	160864	233341	110.305	123770	7.5346	9.73705	422.56	10.0065	37.1161	7.58002
1358.22	102.093	15328	18.2686	179826	222621	109.746	115694	15.9341	1.38941	743.383	17.3337	38.2929	-4.30847
1360.6	66.7206	14987.2	94.9195	168540	238519	132.017	106992	27.4933	25.2318	599.596	18.5197	37.6214	0.463977
1362.99	133.267	17278.4	10.8769	171493	225518	143.721	120713	23.2295	-4.64318	573.242	15.1697	46.2984	3.32191
1365.37	109.467	17894	38.9098	167065	230409	197.865	118694	8.22644	19.4011	446.438	16.1236	41.9954	1.48771
1367.75	88.8736	18305.3	89.9665	163392	231518	165.799	121456	20.2564	10.9503	555.263	22.3259	39.7825	-4.3432
1370.14	104.754	19663.9	46.5708	177430	213123	198.1	129431	4.66525	4.60606	457.342	12.9896	34.4696	9.19081
1372.52	114.642	16807.2	9.44046	186061	208193	112.838	128127	25.3184	23.739	454.997	18.5551	33.0612	6.47099
1374.9	90.5607	17324.7	58.2926	176344	228881	173.157	108687	-9.03486	18.672	896.012	15.552	45.5776	-5.51368
1377.28	118.106	18194.3	84.1451	161454	235312	152.534	118170	3.42967	-5.65476	792.037	11.2267	41.4719	5.22591
1379.66	107.538	18627.2	-4.39875	178285	218549	216.959	120686	28.7633	23.5126	767.088	25.8721	38.8891	-7.62154
1382.05	116.569	17263.7	152.529	176579	223541	121.685	117118	4.53226	8.56982	194.726	13.0722	41.343	8.92792
1384.43	111.74	17337.6	79.3274	166483	239121	140.597	107084	3.61061	1.11606	58.1522	11.1892	36.1214	-1.6865
1386.82	108.672	17167.5	56.8376	185334	219228	138.533	112128	12.4419	9.70392	145.951	18.9484	39.6333	3.03626
1389.2	102.912	18395.8	-8.84328	181513	218718	156.149	116335	21.4407	11.6046	793.069	33.2618	42.1056	1.78915
1391.58	104.484	19595.3	83.5032	158700	227814	127.09	132060	-0.728753	5.32717	772.006	19.8773	41.7975	-4.47452
1393.96	89.9976	17314.8	87.7544	154011	242002	135.881	119100	19.7526	29.971	514.309	13.4886	35.9148	2.82491
1396.34	112.536	15989.6	5.25477	172961	220683	158.976	127162	4.71369	21.6792	822.235	21.9483	42.5833	-4.51481
1398.73	119.406	18677.7	43.679	165341	230667	114.075	119956	3.36179	4.66134	441.788	16.2652	33.0564	1.63031
1401.11	101.285	17465.8	62.8679	180752	225105	136.452	108488	-0.757018	8.82855	772.675	16.7629	39.0238	7.94859
1403.5	104.105	17208.3	9.31718	162401	222071	133.839	138469	4.42289	1.06016	500.951	26.8064	38.803	-5.41287
1405.88	102.554	15450.1	51.8951	176119	230586	128.469	108299	12.3763	1.48964	809.946	13.788	33.274	-4.52706
1408.26	109.598	16664.7	5.15296	173596	219467	151.182	127953	4.60726	19.8092	366.765	14.6707	43.214	-7.78364
1410.64	104.005	19021.5	20.1732	183944	213537	127.204	120656	17.5253	9.00014	484.558	28.325	41.8955	1.84432
1413.02	106.124	17046.8	69.5111	164388	227469	166.939	127642	-0.680529	21.0862	427.918	23.263	37.5693	0.466365
1415.41	91.5537	14480.9	57.0832	170957	229615	149.006	118045	-8.83652	6.69512	418.213	21.1075	34.4596	6.33413
1417.79	83.8668	18412.6	63.4307	167340	231776	138.916	115836	-11.228	2.46743	445.7	18.1423	36.7649	1.69674
1420.18	104.883	17090.3	44.7053	177756	219426	120.984	121645	9.641	-6.64943	738.803	19.6227	33.608	5.83222
1422.56	104.646	15436.2	55.7931	187910	212752	154.678	119895	16.515	0.428889	499.332	17.3367	38.8725	2.9785
1424.94	110.739	18408.8	58.1771	168687	227470	129.871	120397	-6.37407	4.8327	624.618	25.2291	36.3164	4.39891
1427.32	100.755	17031.6	14.507	174671	220972	106.045	123400	7.9265	4.65571	901.98	17.4059	41.868	0.499782
1429.7	132.374	17305.8	-16.0696	185263	217545	105.489	114460	-4.56453	-7.54727	491.347	15.1497	36.8846	11.695
1432.09	94.5045	18496	15.1355	175098	223424	130.788	118189	-23.3375	8.53179	358.815	15.7143	41.9943	-3.37689
1434.47	107.074	16483.2	60.25	159144	229795	94.0113	131558	7.87249	6.37469	668.36	18.5298	37.9541	11.6278
1436.86	119.93	15981.3	92.0248	180254	226027	124.358	109144	-11.4313	9.14335	779.587	9.17451	38.8388	4.19373
1439.24	90.3249	17148.9	5.05651	181320	218222	106.303	118812	9.64615	13.5376	602.276	20.8279	31.6836	-1.90304
1441.62	104.291	17783	59.5426	166263	237505	156.667	108914	15.2149	9.0678	604.363	15.8561	37.1138	1.71321
1444	89.0671	18445.7	56.3374	176447	230950	83.9259	104735	21.017	7.16516	489.429	23.7888	34.3341	-3.25266
1446.38	117.055	18716.6	35.3013	174997	215835	102.135	129772	13.1143	13.2771	199.479	26.6669	41.7644	-6.12833
1448.77	113.209	17875.6	0.699772	172485	225437	145.018	118723	26.6657	5.44313	812.285	17.0001	42.4185	14.0705
1451.15	108.446	15629	0.681627	176918	229240	132.4	109160	33.7221	12.3484	740.756	22.3024	41.2534	4.52468
1453.53	107.233	17664.5	77.5015	191216	206965	113.847	122042	-0.756166	12.9078	610.498	14.8447	40.3746	4.72911
1455.92	110.511	20702.3	62.1868	164985	228119	131.977	122109	4.79918	6.59218	689.715	23.6162	41.457	4.66112
1458.3	107.296	16142.3	18.7328	162507	234579	132.581	119914	20.4372	14.1974	797.504	20.6838	29.8159	6.57476
1460.68	104.617	16025.3	-20.5799	161843	237041	97.6331	117635	3.31301	3.65558	408.473	16.0145	34.0432	-1.83146
1463.06	101.354	18012.4	97.1477	181158	215550	175.598	122010	19.8729	5.44851	693.854	23.0875	32.8486	-4.25878
1465.45	104.237	16637.7	-3.46582	172110	229460	159.013	114627	-8.34179	3.53533	496.512	10.4656	40.8346	3.76688
1467.83	113.652	17308.5	-37.9239	169154	226448	115.255	122583	9.37655	4.34936	532.031	22.5691	39.0861	-1.84924
1470.21	101.285	15753.5	41.1763	180338	210568	165.41	133118	4.56488	19.6533	544.268	15.44	40.6134	7.77149
1472.6	99.3842	18142.4	40.2552	186994	209931	111.468	122843	-0.692047	24.5796	559.302	21.9552	41.0544	-3.08325
1474.98	106.146	15140.8	68.1922	172917	236434	95.0495	104085	15.1674	11.042	667.714	20.9299	35.8789	5.01371
1477.36	102.857	15690.7	80.7954	168840	229448	115.561	120108	-8.57453	6.53447	274.86	15.9082	42.9036	2.73405
1479.74	112.979	17947.7	-27.2491	171531	228230	140.345	116137	15.6728	11.1435	376.334	13.798	35.1491	1.45033
1482.13	102.81	15965.3	84.181	168120	235748	123.131	110753	-9.42368	-1.65113	733.375	14.968	42.6696	13.9517
1484.51	116.126	16079.3	0.749136	168693	231128	135.261	117331	3.62832	-4.84245	374.985	19.4259	38.905	-2.00482
1486.89	101.642	15356.9	-24.8618	160977	234636	186.512	123026	7.31467	12.1191	422.587	20.0979	35.2526	0.4618
1489.28	101.628	14204.4	57.8704	159555	243464	157.476	112507	-0.691291	-0.219196	422.89	15.3916	35.8335	5.22367
1491.66	100.504	17951.3	32.3207	162579	229192	117.508	126467	33.158	19.3933	630.13	10.2882	33.4153	-4.68798
1494.04	100.482	17344.7	82.5971	172201	220990	176.036	126705	15.2789	4.97653	409.151	23.9427	35.6632	4.1756
1496.42	120.823	17324.3	61.7745	173796	230077	109.602	110854	-0.737458	5.85241	305.75	9.42138	40.9264	-0.75725
1498.81	117.909	17064.4	92.033	176673	223072	161.072	117848	37.8079	13.3497	254.896	18.4537	32.9846	-3.20023
1501.19	78.8245	17539.2	50.0277	171171	231551	145.649	112053	-9.10736	20.2802	208.489	27.2339	39.2709	4.11377
1503.57	101.415	17198	87.6375	170836	228848	205.472	116290	10.0017	18.2579	779.99	20.9671	38.0667	10.3682
1505.96	126.327	16713.5	19.3083	181740	225581	127.578	107441	20.9888	14.6091	445.322	19.9804	37.3356	8.00205
1508.34	100.492	17232	71.7411	189536	215327	181.313	112099	10.3467	8.79106	381.444	21.6896	38.7546	4.34301
1510.72	128.474	16665.1	14.6069	176177	224359	224.682	116701	20.8902	-6.54361	571.856	12.3807	38.7809	0.50039
1513.1	110.042	16056.4	60.268	176680	224148	121.555	117080	33.6104	11.647	439.942	15.3942	35.6801	5.43629
1515.49	120.889	17865.8	66.684	171427	226913	189.86	117834	5.13992	5.94025	785.062	16.345	38.3624	10.1135
1517.87	116.009	20287.6	29.2578	168081	227070	99.1174	120007	12.5917	-5.27761	690.923	19.8058	37.7945	-5.88148
1520.25	106.714	18405.3	5.64064	173465	220687	147.954	124404	30.8282	21.4219	537.131	13.5748	35.1888	5.7161
1522.64	107.848	18320.5	23.6025	172839	223181	128.381	121381	12.127	5.01313	722.036	6.68597	37.6034	6.65569
1525.02	111.259	18529.3	80.6674	163292	234333	82.0635	117152	-4.85818	15.3652	536.77	26.3726	36.7524	6.47067
1527.4	84.5077	15088.8	57.2003	178608	213351	126.893	131679	34.9473	14.7021	727.112	21.0888	37.6741	5.15865
1529.78	104.172	16528.7	32.8217	172073	233642	123.014	108219	20.7288	21.4176	609.876	18.4899	37.4729	1.7311
1532.17	102.121	17539.7	85.6515	186548	214813	141.903	116710	11.8669	-2.92151	318.574	16.2399	38.9552	5.30733
1534.55	117.026	18017.8	28.4437	158515	232903	195.086	126363	3.59707	-0.903121	414.125	19.712	38.5448	1.43248
1536.93	119.6	16485.9	5.47965	177999	222782	179.461	116879	-0.728015	26.7134	561.705	16.8859	39.6885	10.5325
1539.32	109.385	16345.6	4.98989	173471	229331	170.755	113232	3.30702	12.7286	485.762	16.5414	31.897	0.459978
1541.7	110.233	18200.6	55.8207	177842	217199	137.961	123990	10.0274	4.69597	554.263	14.1749	37.149	4.20877
1544.08	111.415	16649.5	36.1106	185007	206793	143.617	132003	-16.2149	8.89902	287.407	13.6516	38.6889	10.0098
1546.46	108.454	18121.7	87.7232	174378	221795	133.153	121794	7.8622	15.4997	425.404	16.628	38.2785	4.20013
1548.85	105.639	17717.1	18.4944	177090	220554	119.129	120175	3.45545	1.83747	809.284	19.6824	41.8807	5.25579
1551.23	100.432	17001.4	87.3516	181473	209689	142.829	131772	7.4406	-0.180693	469.692	25.723	40.9821	1.63856
1553.61	112.751	18923.4	26.4666	173835	221393	150.809	122208	-5.68697	12.2226	676.817	18.3184	33.5593	7.39511
1556	105.283	16557.6	115.838	168111	239939	133.271	103830	-0.6926	11.6259	617.286	16.0834	35.0802	8.83865
1558.38	109.85	15621.4	36.2404	170579	221753	142.809	129298	-7.61124	11.6326	617.561	12.4876	36.0709	4.06486
1560.76	102.145	14935.1	-7.63115	162736	233817	164.417	122427	-8.53935	17.1323	312.551	19.2682	35.1677	-4.07953
1563.14	111.64	17458.7	29.4032	170894	223713	133.091	124111	26.2233	10.4471	583.661	17.653	31.9082	4.03415
1565.53	108.995	18323.9	19.8836	159890	223071	127.592	139103	4.82447	9.22652	647.941	17.9103	40.7918	-2.04718
1567.91	111.91	15537.9	-15.9911	178757	227001	141.001	110374	23.9228	5.27075	572.076	22.6431	38.0444	-0.109916
1570.29	121.877	19256.5	55.4971	165921	241782	128.428	101408	15.2977	-0.177585	606.896	22.7269	44.904	7.86658
1572.68	93.7136	16073.7	44.0569	182183	215612	131.681	122800	3.37855	-5.77174	402.047	22.1714	31.812	8.63809
1575.06	89.1031	19133.9	18.3072	176219	217651	169.706	124719	-4.77886	17.816	460.298	26.1026	38.6639	7.2526
1577.44	117.082	14921.6	35.4861	162509	240208	151.547	113020	15.5728	7.10289	174.371	19.2747	31.8735	-0.697971
1579.82	95.6254	18173	25.8916	168701	226395	127.826	122328	9.15154	-3.34638	596.414	14.6358	41.9883	7.22702
1582.21	95.0238	15446.9	120.869	156453	245965	136.856	111693	5.82445	15.6304	320.758	31.35	37.0173	-5.13673
1584.59	114.801	17322.1	22.9947	167610	224858	166	126969	20.0728	11.9921	507.859	23.4595	36.8656	0.481708
1586.97	96.3715	15298.6	-16.3506	189954	209954	153.298	121641	7.38382	21.1272	479.205	28.4335	41.4156	5.10314
1589.36	86.3684	17406.3	82.4084	170488	224755	132.504	123285	22.3225	4.51767	366.716	16.4942	40.2482	18.0635
1591.74	111.738	17237.5	-20.9191	170169	222170	154.559	127831	-5.78272	-3.47601	472.16	23.0614	48.1042	13.1024
1594.12	100.764	15874.7	4.72701	169421	233818	101.248	112386	-8.02878	15.8286	465.446	17.0458	38.4559	6.56204
1596.5	103.279	17972	-29.2203	185930	220384	97.2234	108873	-0.670396	7.04962	226.012	21.4332	33.6656	5.10193
1598.89	104.068	15188.8	81.351	170292	232396	95.6208	113768	-4.40572	10.6062	661.713	21.7462	44.8608	1.52518
1601.27	120.702	21631.2	27.6861	177797	216724	122.029	121672	3.49079	8.01586	373.528	21.0808	39.9237	-4.33468
1603.65	106.537	16014.2	70.7526	166653	235985	121.735	112592	4.43774	8.5073	446.581	11.726	37.1224	0.475287
1606.04	102.385	16337.1	31.6467	181440	220534	177.835	115704	-5.83896	17.9501	694.945	18.365	40.2658	5.22375
1608.42	115.005	16824.4	85.956	166207	231368	127.943	119370	4.32377	5.69499	487.872	28.7495	40.0962	17.6869
1610.8	103.138	18078.8	38.2311	170630	232728	134.464	110173	9.09382	-1.08976	515.138	20.1805	41.1682	1.57373
1613.18	86.5914	16105.4	-3.03831	164625	240292	124.162	108685	-0.592852	11.1766	541.909	16.395	39.4946	-2.66351
1615.57	112.729	17180.9	-15.6357	182763	217909	115.31	117140	9.01394	1.43447	778.841	21.6784	33.5621	0.448398
1617.95	113.313	17834.7	0.880147	173435	226962	116.724	115383	7.41881	11.0457	615.064	19.1941	37.8098	1.3429
1620.33	101.685	17180.2	-55.2645	174826	226667	125.866	114831	-10.7976	12.7025	454.914	22.7302	33.2902	2.80101
1622.72	97.3298	17683.9	5.49825	172029	221261	156.088	126210	-0.711015	-0.841295	551.239	20.2934	38.7723	-3.19621
1625.1	109.267	16663.2	111.355	173291	226132	121.992	117461	15.8812	12.6596	1013.39	21.4509	39.8781	6.44145
1627.48	100.894	16916.2	76.9012	186693	208381	119.183	126475	23.1076	10.1748	838.021	17.6463	39.4313	6.15932
1629.86	95.3265	16543.8	29.9402	173176	225194	172.535	119720	3.24768	17.9229	514.743	20.1684	34.938	-1.50911
1632.25	106.012	17455.9	-15.6029	161213	239938	85.0818	112299	-0.641188	18.7047	803.758	14.4015	41.6819	3.78054
1634.63	100.158	17538.5	17.9021	176575	225239	121.545	114251	-0.662513	5.709	421.628	17.1916	41.9521	-0.684569
1637.01	98.6036	16260.9	79.7114	177807	220048	137.057	121447	7.52743	17.8913	623.923	25.4134	45.2862	8.74505
1639.4	101.574	16176.5	33.8349	174533	230050	122.495	110672	14.8138	6.47415	702.34	18.8907	36.1091	-2.8869
1641.78	114.667	18229.1	38.4832	178927	216419	136	123931	-4.56668	22.4881	310.327	10.6453	42.2935	2.70911
1644.16	108.44	18588.3	85.9533	176352	209223	135.112	137814	19.2759	19.979	500.601	18.9173	41.3778	-0.68424
1646.54	104.947	16615.2	61.3942	190388	221775	100.34	101841	-4.41134	6.652	312.251	17.4012	38.018	11.3273
1648.93	94.1204	18449.2	9.64865	183649	212458	133.766	123458	15.671	13.8347	296.801	18.2074	38.7719	4.0036
1651.31	104.518	16610	-48.9623	168631	228448	158.88	120853	-8.43655	10.653	592.038	21.2982	35.4883	3.81539
1653.69	108.371	17073	36.623	180956	217403	98.2841	120412	20.2057	8.0333	745.899	26.4853	39.8456	6.49998
1656.08	99.9746	15191.3	98.5548	160291	249876	103.706	100679	-8.26492	2.37109	516.847	18.6553	35.125	2.63978
1658.46	115.998	15824.6	81.7155	164260	231480	140.055	123030	14.2879	6.69128	236.678	10.2578	38.7489	5.05206
1660.84	116.834	16760	49.5764	177051	218897	137.041	123810	-8.97537	6.6207	616.137	18.46	37.5621	1.67425
1663.22	107.588	17266.5	130.221	182020	214861	84.3974	122613	11.8434	21.2897	717.975	14.9857	31.8025	12.5111
1665.61	101.818	17997.3	37.7001	178671	220287	130.696	118473	4.66522	13.1761	454.681	16.0532	42.228	-0.738033
1667.99	80.4231	17900.5	31.4736	162146	229620	128.494	126644	4.43155	6.86743	458.945	25.3041	39.7288	6.35605
1670.37	120.144	18204.2	77.196	176292	225485	165.858	113334	-0.739448	0.241604	589.583	16.6479	40.0265	-4.93867
1672.76	102.731	17365.1	118.585	172110	222359	124.402	124293	-6.24154	2.39118	903.378	26.0207	34.7939	-3.29362
1675.14	89.3794	16850.9	84.3742	165779	237648	104.591	110604	28.6909	8.48672	232.181	15.7267	36.7407	11.7122
1677.52	112.751	17577.6	9.86004	173573	224894	110.568	118632	-13.1674	14.0967	618.355	22.7418	28.9254	-6.69825
1679.9	103.622	17111	62.8143	166336	232766	175.722	116746	28.3016	15.7195	506.026	25.6375	35.0095	6.44001
1682.29	103.845	17329.2	18.2322	171451	221219	110.636	127575	34.7443	4.83378	320.523	19.2	32.7001	6.29435
1684.67	103.9	17811.5	-27.2521	180953	216548	157.076	121100	12.541	22.9155	686.982	18.4288	37.406	11.9739
1687.05	91.1939	16585.7	-7.15161	166324	243400	124.227	101318	6.93657	9.74568	374.478	22.8647	36.5768	-5.00089
1689.44	84.7301	16263.5	26.7421	164807	232381	168.209	120332	-10.7356	7.76117	532.078	24.936	32.7284	2.78657
1691.82	108.24	17599.5	23.5154	160025	237031	158.537	118411	4.57509	7.44572	459.616	22.4538	40.0156	4.43621
1694.2	87.3827	16237.3	29.4844	172386	228684	163.415	115672	-10.1934	7.37267	631.722	22.5701	35.5583	10.8999
1696.58	102.714	16843.5	-3.58973	184800	213458	153.616	121579	4.72537	19.7389	662.059	14.3624	44.1881	0.506917
1698.97	100.394	16633.5	22.2922	172197	232745	125.279	109409	-7.32341	0.882636	594.164	17.8051	31.9203	2.76576
1701.35	115.516	19011.1	45.7761	185054	205583	184.976	131089	28.2918	9.3475	629.589	28.116	45.6319	-8.49089
1703.73	88.8898	18342.5	57.6434	173122	223102	129.575	121361	-8.84419	19.5043	431.443	22.3318	32.2326	1.65068
1706.12	98.3183	17162.5	44.6444	168143	230942	171.042	117039	4.43822	6.5642	608.172	20.5943	32.4824	-4.23381
1708.5	96.3549	17705.8	-50.7133	181219	208541	108.511	133178	43.7774	18.6421	640.651	22.6752	40.5998	-0.111117
1710.88	102.852	16681.8	49.4101	183519	222605	146.205	109679	3.44306	9.30424	394.732	14.1937	39.8995	6.41513
1713.26	111.611	20764.7	33.2117	172859	224756	150.99	116567	-0.711257	-3.23981	739.318	17.3018	27.3071	-1.97616
1715.65	102.449	14269.8	125.09	172172	228611	155.197	117792	3.46754	11.0605	672.34	17.2995	34.9223	5.26504
1718.03	85.9573	16936.5	113.779	156106	242249	112.312	116221	-5.54313	14.8912	582.151	26.5185	35.1335	8.3461
1720.41	107.99	17117.9	-3.6705	175147	211996	149.702	136634	17.2991	18.2524	580.861	21.3984	41.3092	7.01599
1722.8	92.1498	18772.3	-3.24341	164057	242346	142.536	103595	-0.655583	18.9684	655.603	18.8297	42.1201	7.31612
1725.18	100.679	16908	27.8799	176425	221988	170.189	119671	-4.88158	4.00796	761.238	14.4166	34.0457	11.9419
1727.56	112.075	16175.3	32.3437	170871	228894	147.99	117437	20.2579	4.35076	594.934	14.4184	36.6003	7.72239
1729.94	85.4744	18627.5	-12.2819	169133	231771	178.045	113288	-0.688399	9.75713	398.989	14.9526	35.6459	13.3863
1732.33	114.389	17314	84.62	181448	217625	188.512	119066	-0.717976	0.981549	761.529	15.5974	37.5904	-0.745204
1734.71	107.032	17771	26.8126	152062	252876	121.628	104640	11.421	10.0835	638.666	15.611	31.6026	2.78785
1737.09	98.7936	17251.3	109.173	163970	231894	145.851	121304	9.8597	12.2882	334.148	15.1402	44.6066	5.35237
1739.48	104.086	16297.9	36.163	176118	222366	178.781	120388	25.0348	7.28953	366.376	23.6834	34.588	11.1347
1741.86	94.5331	16760.6	87.5849	182590	220205	139.714	114022	-10.8094	14.445	924.777	18.6528	36.9522	9.81044
1744.24	91.8658	16522.3	98.0981	171653	224693	121.85	122295	-4.60962	1.86503	784.339	25.6434	38.0908	5.01585
1746.62	100.091	18156.2	148.239	170082	235628	157.575	106188	-0.689403	27.4725	579.726	25.2781	33.3836	0.487087
1749.01	97.0526	18097.5	-32.2468	184102	217694	181.345	114829	-0.738216	3.9349	709.733	23.1837	36.5921	5.67564
1751.39	110.117	15888	47.5576	176181	227195	127.393	113230	4.723	8.7824	517.138	16.2364	40.0595	3.01213
1753.77	91.492	17703.3	-3.44381	180580	220990	150.243	115026	-6.07322	0.633098	609.394	22.2249	41.9238	1.73549
1756.16	94.0682	19655.3	58.1493	181116	220069	132.239	113611	3.71778	17.3102	749.753	19.8255	48.2744	-0.121739
1758.54	105.3	17133.2	28.4565	165481	230916	82.7081	121059	4.63275	13.4794	309.452	15.9235	32.6859	-4.41636
1760.92	101.98	16184.2	69.2764	171222	231010	145.978	113614	16.3361	24.1878	661.04	22.6698	42.9984	-1.64862
1763.3	97.3955	15896.3	90.9609	168388	228274	127.163	122021	9.83472	14.6689	555.987	21.8054	34.812	-4.65974
1765.69	93.6248	16743.3	-53.2295	184648	210911	150.604	126053	-4.94767	14.7981	462.502	21.9952	34.9164	-0.727279
1768.07	102.272	17860	82.6694	178066	225880	128.793	110788	-14.2174	7.24785	518.825	18.708	38.6107	-0.769103
1770.45	76.7401	16568.6	17.6732	166896	219893	64.6821	136517	18.8513	17.0713	385.761	16.2348	34.4199	4.94216
1772.84	94.1113	17314.5	163.239	189148	215973	156.482	111165	-0.714682	10.8909	745.529	13.0515	40.5681	0.506167
1775.22	95.8698	17112.7	72.4363	166260	232801	140.654	116763	11.8462	9.46229	606.878	14.3742	41.3912	6.4986
1777.6	95.0144	16634.8	18.3547	183803	214994	143.685	121190	11.4689	4.55769	212.863	16.8435	38.1769	6.29161
1779.98	100.38	15439	13.9245	170920	237299	143.966	105320	-0.659859	12.0216	555.948	23.0856	33.5254	9.98843
1782.36	82.1934	16598.2	14.7736	173212	229340	115.518	113116	16.3153	7.56502	772.643	28.7998	35.9603	-0.728036
1784.75	117.443	18066.3	107.857	171556	229970	194.741	113171	-6.4271	-7.80825	344.303	21.5515	40.9676	8.37526
1787.13	102.349	18781.9	58.3232	171788	225123	146.933	119519	-9.65389	2.85561	544.532	21.8018	37.495	1.80372
1789.52	99.0458	15910.6	33.5445	167758	240676	132.668	104192	3.62073	14.7576	313.974	13.0264	36.6315	-3.23554
1791.9	86.57	17874.7	40.8143	162599	235090	105.935	117333	30.3065	-1.04727	832.449	17.8016	41.3175	5.23755
1794.28	86.9995	16517.3	84.5549	167984	236827	126.061	108781	14.7593	8.33185	706.775	12.3738	34.0249	2.84926
1796.66	80.7397	16734.3	-30.7643	149301	244954	144.675	121688	-0.703251	13.532	493.994	26.4867	44.3941	9.11795
1799.04	90.1871	16578.7	45.3448	183153	217922	118.347	117312	24.1752	-0.0351679	560.524	21.4488	39.2933	0.483339
1801.43	104.852	16087.1	64.8838	167802	235622	143.824	111158	-6.03321	22.1684	831.215	17.7628	36.4605	-1.95741
1803.81	115.22	17933.7	75.2111	171167	221002	130.809	127418	4.70759	23.9446	543.632	10.5233	46.6153	0.505954
1806.2	94.589	17628.2	42.2224	175925	223773	145.966	117158	20.6661	0.315458	493.376	28.3127	30.3167	-1.96092
1808.58	85.2049	16755.4	-7.97004	173611	235625	112.662	103234	-0.707567	14.3349	369.09	12.3266	32.5813	9.18116
1810.96	102.978	17667.4	11.2334	183628	213958	141.918	121621	-0.764018	35.1589	614.081	22.0684	42.3847	9.91522
1813.34	94.5528	18482.5	127.91	165871	217420	117.368	139363	21.2676	17.1384	667.755	25.3152	40.4768	-0.119474
1815.72	108.286	16168.5	18.9411	169040	232133	142.354	114727	14.9172	10.1239	865.578	26.9577	36.9217	12.4568
1818.11	115.539	18343.3	14.654	176570	223820	101.549	115431	20.3318	26.305	610.483	10.2034	39.0899	10.1699
1820.49	116.56	17667.1	26.2583	176034	219793	151.53	122922	8.57918	25.0575	585.786	31.6349	39.9408	13.3207
1822.88	93.7767	16085.3	74.4328	162696	238206	109.102	114241	-15.0018	16.7229	736.355	22.8299	33.444	-3.20227
1825.26	75.874	15684.5	46.9779	165029	249563	131.939	93963.8	11.0824	3.15946	929.447	20.7968	30.4687	-5.72877
1827.64	89.2552	17562.2	-12.9047	164181	228454	159.271	125857	32.5095	2.50394	614.136	17.8104	43.9021	-3.30832
1830.02	90.366	17413.8	116.233	172304	225594	133.506	119629	12.2289	-0.718155	240.934	21.0753	43.9318	7.94876
1832.4	95.2239	16642.1	77.6637	164530	237920	87.6335	111759	3.52436	6.15564	640.028	15.112	34.6482	-0.720833
1834.79	101.316	15808.8	37.1982	167083	228007	134.107	124208	7.73863	12.669	681.689	23.0418	39.9767	1.70514
1837.17	98.406	16659	-7.36679	165669	230100	122.089	122580	-4.65942	26.6857	223.645	15.5091	41.7235	17.1714
1839.56	94.8583	16660.8	-7.61123	176236	224594	110.087	116534	-5.84379	18.1406	477.036	19.0038	33.7753	5.24024
1841.94	89.5518	15116.3	-7.43828	173349	213386	131.58	139010	-8.75419	18.7457	507.071	41.1525	32.3015	-3.02002
1844.32	104.052	18047.6	97.6776	172394	219063	145.961	128249	21.8386	15.4177	894.691	23.3777	42.6185	3.12647
1846.7	93.6335	15065.7	28.0971	173502	236170	131.591	103987	32.8774	13.6422	442.534	22.9362	37.6305	5.92326
1849.08	106.042	18680.7	63.9311	183763	212996	106.884	122062	-6.38095	12.8414	476.094	20.0984	28.6296	10.9176
1851.47	102.921	16459.2	5.74426	166890	232818	128.751	116151	20.3981	4.79866	1086.85	24.2785	34.6647	-3.14842
1853.85	87.1269	16779	62.5063	167929	231732	99.1906	116554	-0.672025	19.6907	595.769	20.0584	30.4577	-3.06336
1856.23	79.3247	17691.4	81.7913	186337	216088	148.665	114716	12.5849	2.1642	541.403	25.0596	43.5404	-2.03522
1858.62	89.5207	19183.1	81.186	176516	219380	117.239	121476	28.6428	8.95634	566.588	21.528	43.221	-3.28776
1861	101.14	17714.7	98.5075	172097	227883	140.218	116009	-0.678381	17.5301	368.579	23.2572	37.7553	-0.708307
1863.38	85.1535	16601.6	98.6209	175467	217357	120.281	128212	-22.4338	20.498	875.075	21.2333	41.0027	11.7598
1865.76	114.615	16034.9	-22.3872	161217	238212	83.8178	116666	-14.0747	13.0307	425.047	21.7431	42.4044	-4.60099
1868.15	81.2984	18048.4	209.5	184532	214194	100.492	119577	10.3617	22.3698	555.746	21.6745	29.7946	0.518406
1870.53	83.4577	20766.6	107.254	169846	218801	127.851	129379	25.201	16.8646	1026.8	21.7289	40.7506	6.71748
1872.91	85.5196	18948.5	76.8901	173584	232612	123.279	105420	-9.02275	13.5763	632.955	17.9667	36.6203	1.68763
1875.3	85.3608	19459.8	64.7214	177723	218763	146.125	120492	14.4736	22.2942	602.39	22.9779	36.0282	8.41767
1877.68	92.2648	16272.7	74.5477	165965	222697	125.732	133675	-9.28269	9.78271	381.484	18.4845	42.5045	-9.37586
1880.06	75.144	18966.6	73.399	162075	227798	105.291	128444	9.30146	14.5815	498.807	18.1588	34.0234	1.61106
1882.44	106.052	17323.2	1.28207	162489	233620	106.286	120551	3.48017	4.07499	562.538	19.7291	36.9208	8.86654
1884.83	88.6498	17387.4	49.6452	186660	219273	153.447	109970	7.5712	1.69213	284.634	18.3567	33.4935	11.1589
1887.21	76.9703	16984.3	61.2805	163532	240419	120.634	109046	-0.656805	4.92223	556.821	18.4821	35.4853	9.72396
1889.59	82.0115	16537.9	-16.2571	168001	226568	90.4334	124607	-0.671117	15.0532	691.35	12.9396	31.0641	6.39106
1891.98	87.2949	16533.8	-74.2911	170474	224737	116.398	124081	-0.724097	7.23274	702.045	21.0223	46.1999	14.5505
1894.36	73.0611	15795.7	-11.6211	174323	230752	89.2785	110511	15.4424	9.84178	544.206	16.1742	35.5315	6.26202
1896.74	109.522	17222.2	-3.53884	184739	213300	179.647	121435	34.46	20.6562	681.664	18.1946	46.5293	15.0794
1899.12	123.62	18906.2	6.74179	170284	233547	139.704	108612	17.5172	-0.765369	482.586	16.0905	47.007	0.571371
1901.51	78.8719	17366.1	72.3313	158496	242537	144.462	112075	4.81814	13.0083	687.437	18.4576	35.6051	3.07035
1903.89	88.9881	16564	65.6063	174145	226939	115.176	115400	-12.3179	12.4445	916.094	13.8988	35.8424	-0.789797
1906.27	104.183	17135.2	57.9279	166672	223112	124.283	131242	16.9446	7.93284	363.282	17.7465	34.6381	3.0585
1908.66	84.5193	18446.4	57.5465	174524	223583	110.359	118360	13.5464	14.4055	724.588	21.9538	43.9451	-6.31191
1911.04	73.5465	17529.3	75.7431	170773	234878	90.2947	107249	-0.710625	25.5429	516.805	24.4412	34.3677	1.76322
1913.42	91.8326	20053.8	1.37545	176807	227488	142.336	108189	-0.708462	13.4599	314.111	15.5664	33.8609	1.75816
1915.8	82.6764	18321.7	122.87	162979	230933	133.324	122768	8.04466	17.8465	693.481	15.696	38.0448	9.33441
1918.19	75.5896	15867.2	-35.2583	168434	228563	172.107	121739	-4.99242	24.8263	495.055	25.3283	40.3078	6.06095
1920.57	81.9455	16120.5	138.896	188071	211721	127.018	120454	15.4668	12.1669	598.31	17.9485	38.2312	2.79184
1922.95	96.3885	16740.1	117.026	168956	231501	90.202	115657	3.62879	16.262	399.586	18.0491	37.6632	1.75517
1925.34	89.7857	17287.4	39.2853	176030	224284	65.516	116708	25.8952	2.20766	408.866	19.111	37.291	6.26425
1927.72	83.3064	16476.4	9.98712	148873	248599	124.372	116696	-0.661896	19.8622	737.173	17.4976	32.6174	7.19606
1930.1	97.7616	16146	6.06735	168733	233090	119.701	114203	16.7359	22.3953	373.101	23.2091	38.7073	0.510703
1932.48	79.2598	16049.5	93.6322	163034	234762	150.056	118689	-0.704224	8.13398	1113.53	17.9951	41.4018	-0.737743
1934.87	83.6476	14652.2	14.1292	172058	223756	91.3224	125185	9.36558	13.7338	700.786	12.6211	35.375	2.77562
1937.25	78.7096	15702.4	24.7854	161707	236988	108.407	117903	-11.6612	22.4909	707.865	16.9623	39.2739	3.03323
1939.63	92.7802	17789	30.9868	192105	199900	93.7463	131544	8.45969	19.9045	683.353	15.1692	36.547	-1.7796
1942.02	71.9963	17419.1	55.6095	169867	233088	165.991	111234	16.5367	18.0551	546.836	15.1862	36.588	11.1526
1944.4	104.076	18199.4	139.655	169348	232125	124.109	112532	-0.752787	10.9657	594.429	18.5812	33.2336	4.53388
1946.78	87.3016	15266.1	20.1879	166649	230662	134.656	121317	16.8531	8.98899	651.746	24.0073	38.7706	3.04221
1949.16	91.5169	18477.7	41.3737	154944	235368	125.55	126441	-0.759616	10.6926	1078.84	19.6002	44.05	-3.48284
1951.55	84.21	16318.8	29.0554	169598	230855	148.586	116179	-6.09596	12.6934	497.515	18.5876	36.4725	4.23073
1953.93	70.8743	16363	29.0421	184153	224313	127.942	106188	-0.701589	8.83028	854.002	17.328	40.4955	5.4693
1956.31	89.1726	15531.1	1.45996	164109	229641	230.74	125857	43.3395	17.9796	712.021	26.6329	68.8489	14.4618
1958.7	70.8741	18999.2	10.5162	162457	230065	274.345	123960	68.6213	9.4304	745.843	23.3146	138.495	25.0517
1961.08	62.0578	19457.8	141.335	169040	228602	431.312	116339	68.8747	14.8186	969.025	23.3421	170.131	41.5666
1963.46	61.2547	21085.1	125.908	183180	208827	681.9	125632	37.0745	8.0265	1058.05	27.1478	223.217	39.486
1965.84	55.2389	23912.5	282.182	156284	243558	984.073	105035	121.785	20.2696	1458.47	23.4937	411.476	62.3428
1968.23	49.4507	24141.9	253.097	176355	226571	1283.32	103285	179.899	28.0692	1561.37	25.5287	422.284	64.5814
1970.61	46.9901	24532.1	329.116	155499	249848	1465.42	94805.4	256.807	25.5442	1789.17	24.2999	577.191	70.9846
1972.99	32.466	25893.5	401.762	168997	233545	1610.26	99682	201.904	39.1567	2111.49	18.9265	671.233	75.9266
1975.38	35.5541	30602.6	499.241	162125	234376	1933.05	102645	263.146	41.4373	2148.8	22.1974	657.144	91.9272
1977.76	28.756	28148.2	457.042	149276	248980	1743.85	99695.9	250.871	42.0957	2645.06	21.5991	783.532	104.576
1980.14	26.7624	31273.2	439.233	138564	264464	1983.37	87457.5	374.106	38.2972	2363.66	19.4212	735.093	96.8583
1982.52	32.276	30414.8	574.383	147220	252649	2079.89	94287.3	329.972	36.5444	2494.06	22.6755	780.606	114.343
1984.91	31.757	31976.2	438.378	153278	244682	1847.84	96547.6	436.767	34.8636	2914.02	24.2584	877.313	117.022
1987.29	40.0309	34040.2	623.256	156453	242037	2485.27	93778.6	386.357	56.8831	2655.39	21.1988	922.843	117.409
1989.67	28.1403	30525	642.777	141131	257775	2087.7	94778	297.604	41.234	2128.4	23.5069	879.815	103.689
1992.06	39.1999	33590.1	725.438	159839	241627	2496.66	90027.6	390.974	42.1169	2737.57	20.7565	979.333	108.996
1994.44	41.3307	33696	596.85	160553	240436	2655.09	90494	452.806	43.5201	3005.21	22.8493	928.176	135.73
1996.82	43.0756	31549.8	675.919	140113	260689	2420.84	89683	402.41	45.1658	2630.29	22.533	954.763	136.248
1999.2	34.542	34452.3	625.034	149011	250741	2528.85	89824.8	349.118	40.9107	3002.87	20.8796	910.893	138.893
2001.59	31.9331	30115.4	592.148	137750	267553	2345.26	83866.8	418.958	47.3963	2793.52	18.6262	862.103	118.028
2003.97	39.9168	34435.2	662.691	155274	242391	2651.9	94033.6	398.027	42.718	2801.1	20.0913	1017.34	129.935
2006.35	38.8714	35197.6	643.896	158161	241507	2431.48	91245.4	378.007	40.624	2619.76	17.0778	938.842	108.519
2008.74	37.7939	32740	628.866	144357	255856	2245.03	90306.7	420.21	57.344	2740.39	18.7961	917.675	143.054
2011.12	40.5726	32727.3	560.748	150117	251272	2435.59	89582	389.269	40.4064	2713.1	21.8934	899.531	104.684
2013.5	35.7208	35248.8	665.735	158636	236769	2450.3	97465.4	421.79	46.6102	2807.3	22.3181	998.522	121.104
2015.88	31.2512	32083.1	532.005	155839	249291	2170.86	85610.8	443.032	66.4109	2772.33	21.6155	909.674	130.151
2018.27	43.4396	34272.8	543.272	158291	240223	2442.32	93872.2	401.345	51.84	2735.12	20.3372	927.821	128.145
2020.65	32.8732	31292	511.914	147667	252796	2309.69	91717.5	365.917	45.6031	3106.59	19.3439	943.829	141.196
2023.03	27.0832	35313.5	629.794	153117	245762	2650.96	90887.3	389.778	40.3415	3037.83	17.0537	897.79	151.004
2025.42	36.0008	31520	603.816	146194	249623	2326.95	98477.7	400.398	35.5623	2797.65	21.298	934.386	129.531
2027.8	29.8421	32198.6	726.274	160469	246149	2366.62	83753.6	394.778	43.3519	2765.22	20.6972	904.624	119.33
2030.18	34.9667	32537.6	610.352	142482	258784	2432.95	88768.2	424.538	52.9985	2374.3	25.3766	927.578	110.463
2032.56	31.1727	35354.7	593.326	142812	257427	2408.45	87289.4	394.914	49.1224	2924.71	22.813	878.596	132.546
2034.95	25.8418	30498.6	539.33	161957	242626	2352.71	89050	391.996	47.5688	2610.06	17.151	1017.4	129.028
2037.33	27.6675	32517	626.439	153377	251623	2635.62	84440.3	439.437	44.0862	2760.21	21.1402	974.693	112.544
2039.71	27.3223	35096	562.779	144689	256564	2410.1	86422.5	436.865	40.3011	2821.85	18.7554	882.413	127.296
2042.1	27.3163	32787.5	644.594	154293	252606	2544.91	81611.8	401.192	43.2509	2678.18	18.98	979.751	117.706
2044.48	28.0057	31892.4	691.29	164310	234388	2326.26	97029.6	435.768	34.3817	2453.73	16.041	1058.04	135.342
2046.86	28.9455	30754.3	616.537	150095	247662	2488.45	96483.5	405.893	46.2518	3038.99	18.2951	1033.28	130.469
2049.24	34.8495	32483.9	620.838	151441	249113	2601.3	91162	370.065	53.2876	2597.11	17.9011	976.535	127.285
2051.63	32.2691	35406.1	581.332	161495	238169	2391.96	91389.2	424.589	35.1751	2863.32	22.378	1037.05	124.492
2054.01	27.1558	32662.3	736.025	148501	249010	2439.21	94858.4	403.268	39.9678	2913.66	19.2893	930.936	121.547
2056.39	26.0461	34526.9	621.784	145670	252428	2692.49	91116.2	383.951	44.6951	3402.63	23.0748	956.542	128.115
2058.78	23.7028	32504.3	571.165	153037	250438	2364.6	86802.8	418.117	37.8435	3058.49	18.9516	941.319	127.617
2061.16	25.4642	32444.6	622.002	162113	242578	2415	86715.3	362.972	47.2438	2852.58	24.9538	970.747	149.539
2063.54	22.3784	32421.2	657.273	148314	253221	2566.55	88905.2	424.961	47.4785	2856.51	24.9263	924.677	133.826
2065.92	26.1728	32068.3	534.718	152576	243447	2354.28	98570.5	461.35	39.1087	2959.86	21.2186	976.043	151.912
2068.31	25.8245	43747	604.845	156783	238930	2278.98	89123	405.581	48.5508	2423.7	19.4075	944.214	131.207
2070.69	25.2151	34573.6	660.306	147766	248914	2196.17	94916.8	428.099	50.181	2361.65	23.2588	915.413	145.253
2073.07	20.732	30091.6	514.994	148545	253946	2541.06	90171.7	371.664	40.4068	2685.97	29.4624	910.807	113.614
2075.46	23.9642	30979.3	613.125	151357	245896	2253.81	98193.8	419.494	37.8398	2361.15	22.2402	931.747	104.12
2077.84	22.3442	34753.8	531.878	154321	248831	2420.45	85545	440.742	38.8487	2813.82	19.9922	963.632	119.315
2080.22	22.5622	32302.2	629.602	149784	251417	2303.3	89922.1	467.035	45.9883	2900.52	19.3838	978.231	132.951
2082.6	21.7286	31225.4	717.806	149987	253356	2592.77	87764.1	441.257	36.8553	2547.23	23.7043	945.562	123.645
2084.99	25.6343	32449.1	618.145	153885	246061	2396.12	92654.4	451.786	49.4975	2702.9	24.2449	857.188	133.93
2087.37	19.0452	29178.5	632.464	154228	248226	2748.23	91591.6	433.107	53.0443	2790.6	27.7792	928.446	141.412
2089.75	22.7114	30907.6	624.126	143806	256701	2416.65	91248.2	392.526	47.7566	2939.11	32.013	940.993	123.723
2092.14	24.6177	33370.2	524.912	158364	238249	2783.55	96983.3	438.428	39.5171	3194.72	27.2779	905.474	121.068
2094.52	21.3168	31753.3	631.555	165236	240098	2518.09	86786.9	418.675	45.9658	2888.77	22.7478	972.67	121.417
2096.9	20.8936	30729	632.015	152312	252501	2493.73	86565.4	396.115	43.3988	2629.43	22.8847	959.791	116.076
2099.28	24.819	35294.6	606.322	151025	246712	2421.31	92591	431.733	47.1123	2822.97	23.8852	972.357	136.964
2101.67	17.5462	33740.1	594.328	148356	255047	2311.41	85184.1	399.337	50.8792	2757.04	19.6977	961.406	127.384
2104.05	21.9657	31537.9	646.194	154735	247975	2420.51	89341.5	346.197	41.2477	2758.12	20.9041	1033.42	140.469
2106.43	18.1747	29614.1	498.753	142151	263835	2420.37	84078.7	381.938	37.4119	2891.34	22.4554	888.792	141.186
2108.82	19.7007	30635.6	551.459	149852	249439	2418.9	95083.5	463.178	40.0798	2289.37	19.558	919.454	128.956
2111.2	15.9835	28206.2	461.253	148953	252781	2476.88	92849.7	438.488	38.3726	3067.23	22.9443	984.606	127.41
2113.58	21.6827	32081.9	752.312	149134	243702	2288.27	102873	450.387	43.4424	2738.13	32.5508	920.802	149.92
2115.96	20.5993	31928.7	663.162	154289	243743	2321.11	96243.7	517.352	46.1319	2474.68	22.4685	947.939	121.269
2118.35	20.4173	29583.6	658.319	149822	253775	2349.46	88897.5	448.591	43.8964	2841.75	23.5589	957.993	143.52
2120.73	14.4061	36578.3	594.54	146288	258443	2660.54	79436.6	438.079	48.4312	3026.16	23.4201	990.003	127.622
2123.11	18.712	36731.1	645.194	171026	228989	2392.2	91185.9	442.947	48.5097	2904.43	26.5853	1003.93	111.174
2125.5	15.3615	29247.2	603.544	141882	265584	2510.04	82346.7	379.657	27.5157	2453.23	24.6389	905.507	109.584
2127.88	16.8404	32231.2	590.729	143344	254746	2378.72	93740.5	369.623	37.9435	2878	24.3523	977.642	117.811
2130.26	12.7543	35846.8	710.717	156034	248108	2308.17	82899.4	463.669	46.2739	3048.93	27.8379	995.406	117.921
2132.64	17.936	30760.5	631.459	155741	245932	2705.84	91620.2	374.386	44.3296	2762.47	23.1735	1000.84	138.286
2135.03	14.3207	35092.1	542.572	153378	246723	2432.19	90187.9	386.544	42.533	2365.92	21.2219	953.624	113.884
2137.41	14.4689	30542.2	615.532	151919	256336	2292.3	81577.6	382.388	40.3229	2639.78	19.6714	1018.36	115.059
2139.79	14.1586	30931.8	597.532	148460	253702	2456.35	89728.6	397.348	36.4767	2720.07	22.1149	958.103	132.567
2142.18	11.2194	33503.6	570.538	142078	255128	2310.6	94049.4	412.806	39.3827	2501.79	22.621	948.209	120.359
2144.56	12.8589	33997	561.225	149083	248849	2337.32	93744.9	353.221	45.6371	2528.19	21.524	942.519	121.978
2146.94	14.9816	29651.9	631.888	165132	242961	2714.21	84591.9	383.953	41.0763	2697.75	25.8875	1015.21	126.814
2149.32	10.7729	29367.8	628.223	147932	258935	2330.08	84009.2	435.679	40.2693	2772.12	23.671	859.377	134.337
2151.71	11.7483	33044.2	463.855	152585	246774	2613.09	92341.4	392.103	37.7549	3201.17	23.0729	926.506	119.745
2154.09	15.4392	43476.9	699.67	151409	245738	2404.39	85512.4	427.356	31.4222	2925.21	26.7057	1006.43	109.985
2156.47	10.3473	30708	584.931	144555	259947	2411.64	85664.2	410.771	48.369	2846.99	22.179	877.37	119.625
2158.86	12.1127	31910.1	624.94	157092	242074	2546.9	94287.5	443.532	46.6598	3218.27	27.5522	963.957	110.661
2161.24	11.6247	38303.1	611.25	147395	248731	2788.2	91304.8	488.225	44.0801	2672.69	20.1758	949.17	134.227
2163.62	16.2497	32167.8	639.049	159647	236316	2344.11	99714	400.491	46.5288	3061.67	19.9746	990.132	122.837
2166	12.7698	31783.4	530.104	150890	253125	2478.26	86570.3	445.739	42.7199	2653.25	26.5707	962.435	122.839
2168.38	13.7248	37430.6	601.898	147335	249062	2511.4	91370.9	330.723	43.9935	3478.25	24.1997	1004.83	123.366
2170.77	10.5561	35711.8	669.745	157561	239052	2461.58	94884.9	425.397	40.647	2852.06	26.5604	1066.68	145.547
2173.15	10.4746	32034.5	582.979	147140	251631	2355.2	93008.4	458.183	39.814	3385.18	15.9012	998.317	135.251
2175.54	7.19396	32029.1	708.012	145098	257223	2483.88	87484.1	393.988	41.4085	2991.43	25.0325	910.297	117.276
2177.92	9.5161	34444.8	634.524	154685	246564	2826.46	88096.3	534.981	47.5264	2896.36	21.2564	1021.8	146.818
2180.3	10.4405	31614.4	650.435	147009	253412	2366.01	91544.3	373.638	48.4367	2749.09	16.4656	899.83	128.192
2182.68	10.0256	36022.7	719.264	148336	244987	3054.83	97699.7	381.187	38.989	2640.09	27.5412	1023.55	125.828
2185.06	10.6606	28823.4	516.201	142593	259279	2397.21	90992.4	369.972	44.9549	3056.14	22.3619	1007.87	120.116
2187.45	8.60064	34918	702.455	162689	243725	2599.57	81594.1	447.937	45.9463	2739.75	18.1543	973.697	129.865
2189.83	7.52281	29091.8	567.812	145747	265098	2180.86	78364.3	348.502	40.0503	2525.21	17.6468	858.727	110.573
2192.22	10.5438	38873.8	670.246	148474	249559	2523.77	88042	568.264	48.7436	2588.46	23.6147	1113.07	114.347
2194.6	7.70943	32359.7	560.596	150239	250287	2353.95	91485.3	406.844	37.1979	2596.59	19.4825	889.723	119.65
2196.98	9.99793	27906	606.341	165141	241879	2218.41	88730.8	382.911	46.4061	2474.9	17.1039	845.228	131.494
2199.36	8.83558	33064.3	703.984	148997	248416	2723.21	94530.8	385.763	55.4154	2839.08	26.3554	991.192	143.363
2201.74	8.48518	33770.9	675.563	145892	252141	2451.4	92779.4	456.893	42.156	2636.51	22.5863	959.481	116.996
2204.13	5.84227	30728	591.168	148811	250256	2333.61	94575.2	366.415	42.4388	3070.6	28.9978	935.881	123.465
2206.51	4.95037	31978.4	652.406	138550	268682	2278.3	79460.1	401.443	44.9198	2565.85	18.0668	916.517	143.897
2208.9	11.4316	38287.1	546.376	155958	244803	2447.57	86227.1	372.981	37.5536	2764.63	21.112	916.011	123.551
2211.28	8.90683	40453.8	687.275	149235	238842	2694	102024	368.749	51.1799	2587.99	25.2	1017.96	121.105
2213.66	10.1556	35703.1	606.788	141677	252392	2253.22	96828.7	357.646	38.768	2436.18	22.5625	892.284	130.49
2216.04	6.62751	32608.6	567.487	152557	253673	2392.64	82443.9	419.17	52.1976	2985.25	24.5952	937.099	151.167
2218.42	6.99725	32608.4	546.736	148783	255222	2418.7	85441.2	389.272	48.4558	2772.06	24.1855	921.526	127.408
2220.81	7.22268	36024.2	562.891	149930	247506	2124.85	92605.7	401.74	39.4021	2775.77	25.5479	925.715	143.635
2223.19	9.27647	33243.7	649.249	159282	238824	2579.05	95328.8	343.385	48.7793	2951.91	20.0243	970.245	105.973
2225.58	7.68798	31599.3	629.14	155553	249210	2572.91	86456.8	387.698	43.1669	2581.67	19.0709	881.394	123.349
2227.96	4.77948	31057.3	552.327	144815	257326	2392.59	89107.8	424.238	43.4348	2682.59	29.8439	953.362	128.915
2230.34	8.1908	29631.1	568.546	131909	273456	2528.76	83259.8	359.249	58.9744	2632.33	25.1845	913.497	120.873
2232.72	8.69266	31331.1	549.441	140762	264316	2404.52	83421.2	398.95	47.1416	3050.59	23.2348	826.252	125.956
2235.1	9.7972	34593.7	645.809	164744	233839	2573.99	93920.9	377.528	53.539	3248.92	25.1075	995.528	128.367
2237.49	7.31842	31333.1	522.537	134265	273845	2120.72	78608.4	373.99	41.2142	2293.44	20.0619	863.869	121.493
2239.87	8.34198	30334.8	538.473	152751	249420	2216.11	91575.1	396.852	38.7558	2554.21	19.8356	867.171	129.252
2242.26	3.95439	34433.4	610.409	155694	242070	2395.5	94267.4	355.739	47.498	2985.79	18.723	902.73	136.897
2244.64	7.65739	30919.1	635.897	152160	249003	2542.83	91962.6	390.46	44.0641	2592.64	22.1705	926.76	135.467
2247.02	4.45152	33081.9	735.379	150268	250950	2598.83	89088	399.726	42.3506	2669.48	24.4108	1083.76	126.588
2249.4	8.65252	31929.1	654.648	156393	240210	2437.12	98371.3	440.971	46.2088	2934.32	19.6264	987.215	120.301
2251.78	5.60841	33706.2	607.848	144172	262729	2353.85	79449.5	394.227	38.7072	2422.68	26.3603	918.714	119.222
2254.17	4.74078	33001.6	623.302	147787	252369	2146.59	91148.2	337.18	39.7492	2586.29	21.2631	944.937	117.052
2256.55	4.76612	31705.8	825.38	148930	252988	2729.45	88812.2	460.887	37.6522	2807.08	24.8789	936.455	129.126
2258.93	5.21707	31509.9	532.75	149043	252632	2264.69	90551.8	332.612	46.1209	2562.91	25.6953	888.563	124.383
2261.32	7.23055	34726.6	669.655	154974	238920	2598.74	99391.1	454.636	38.1263	2939.36	28.1964	971.352	134.647
2263.7	7.52083	31693.2	615.127	143308	255729	2273.62	93169.5	395.869	47.8531	2474.59	24.2757	1010.82	132.753
2266.08	4.93093	31263.3	570.349	145052	259255	2350.28	85625.2	443.617	43.0165	2746.52	19.0791	901.354	131.691
2268.46	7.64959	31128	600.768	147560	260970	2561.57	79500.5	397.178	45.5089	2828.01	20.9626	911.686	120.792
2270.85	7.71038	34851.2	553.087	139196	259565	2578.13	88792.2	448.926	35.7636	3220.5	25.8717	1132.61	124.331
2273.23	3.2021	33292.9	572.352	138249	265687	2492.65	82753.6	413.028	44.9117	3018.52	22.558	832.184	114.274
2275.61	5.54661	36318.6	565.529	159803	248156	2327.77	78119.4	352.383	44.1832	2621.82	24.558	825.707	120.253
2278	8.49494	34696.9	675.33	166262	237687	2514.19	86192.2	446.329	52.3016	2779.06	27.3943	1045.51	154.797
2280.38	6.18088	31069	585.668	147539	253439	2445.15	91003.1	449.137	43.8023	3018.43	24.2008	895.174	112.877
2282.76	5.55311	31495.4	657.246	157445	243551	2447.53	92591.9	465.315	52.3435	2579.36	21.8532	912.913	137.472
2285.14	4.0102	34785.3	733.383	153199	248969	2585.64	86225.8	366.536	44.0303	3220.28	19.2924	892.268	132.537
2287.53	6.31106	35871.8	522.309	150374	249169	2761.33	89045.3	459.443	44.739	2749.37	25.8434	960.449	127.483
2289.91	5.14091	29501.9	579.479	140559	276369	2231.26	67885.2	324.614	36.4102	2365.85	23.0346	823.084	117.52
2292.29	8.22047	32127.4	556.002	155911	243271	2194.42	94768.1	432.345	45.4747	2638.43	26.4986	965.221	126.656
2294.68	4.59088	32156.3	532.237	158081	247989	2119.79	84688.7	398.354	36.2549	2723.33	23.0106	951.106	116.225
2297.06	6.01563	33807.4	583.786	158299	240855	2397.63	93642.6	349.95	48.1118	2569.3	22.9161	887.795	126.105
2299.44	6.11847	33815.6	567.726	164415	236034	2494.42	92412.2	446.633	42.0878	2598.3	21.0617	1042.73	133.344
2301.82	6.14127	34137	739.292	149340	250319	2443.98	89499.3	441.756	51.4033	3680.71	19.8706	986.629	145.295
2304.21	4.89718	36290.4	624.077	156446	240587	2539.47	93535.7	427.155	55.6907	2759.87	24.2091	1095.5	135.864
2306.59	2.70489	34514.8	647.694	154163	242642	2461.28	95211	443.314	38.7754	2919.55	26.1613	954.516	119.034
2308.97	5.48794	32188.5	644.592	153884	251594	2460.69	84227.5	384.81	50.6428	2941.56	21.2686	892.724	129.463
2311.36	6.1123	32782	556.394	164391	236608	2723.21	92365.2	375.699	52.8852	2683.42	35.5337	1029.86	141.173
2313.74	3.95258	31924	656.95	155730	240148	2336.09	99773.4	392.992	64.7052	2557.81	28.3951	1063.48	118.599
2316.12	6.40162	35279.8	622.278	140087	256510	2488.18	92239.1	468.87	49.2779	2924.78	20.9912	958.283	113.396
2318.5	4.96469	35247.8	752.558	143686	257549	2629.6	85868.7	409.731	52.3735	2620.58	24.789	976.96	121.344
2320.89	4.23672	32201.4	580.596	148906	253872	2484.54	87155.7	431.975	48.3998	3212.83	26.4216	950.253	128.411
2323.27	6.75281	33505.9	606.854	159625	246322	2460.98	83760	351.5	48.2674	2456.1	28.6769	929.211	128.215
2325.65	5.84951	32097.7	742.029	160257	238957	2840.14	94484.3	468.729	35.461	2761.89	25.723	1074.46	160.242
2328.04	4.90855	31345	736.541	148982	253842	2458.76	88255	383.987	45.2598	2747.37	24.8654	938.734	134.383
2330.42	1.9289	34065.6	506.71	150504	246608	2419.57	94911.2	413.145	44.7069	2802.24	30.9882	881.616	128.901
2332.8	4.34642	34359	589.65	148858	243978	2694.41	100194	394.557	48.4551	3100.08	24.9521	986.253	133.424
2335.18	6.41258	32054.9	575.958	155318	242897	2584.6	95684.2	387.957	46.9095	2821.6	22.6668	1028.45	130.742
2337.57	5.42796	31175.1	594.589	170203	236489	2685.34	86616.1	356.275	43.119	2460.12	25.7344	897.635	113.039
2339.95	4.99483	32773	674.821	156940	244108	2574.88	90918.1	444.912	44.9614	2735.3	18.6819	964.496	126.316
2342.33	4.9736	32210.1	586.105	147236	257513	2731.45	83899.5	466.168	37.1712	2885.91	27.6096	925.963	134.526
2344.72	6.38798	33011.1	631.866	158455	246173	2365.51	85508.9	408.28	36.4162	3062.84	22.3109	906.578	128.497
2347.1	3.89952	31365.4	581.008	152589	255612	2305.35	81137	350.27	38.1402	2634.53	24.1224	940.026	121.224
2349.48	2.62532	33605.4	542.765	154304	242619	2637.22	95939.2	489.507	50.6678	2733.79	22.8213	1018.66	142.714
2351.86	3.90164	33623.9	653.171	149502	252399	2146.23	87761.1	355.066	38.5362	2904.96	18.4109	1006.56	155.375
2354.25	5.69876	35187.8	689.116	149625	250297	2621.32	88849.7	478.374	36.2286	2782.99	29.7688	964.233	144.185
2356.63	2.64961	33193.3	503.954	155485	235525	2462.23	106056	377.509	48.186	2669.58	24.5689	927.889	139.225
2359.01	5.21562	31713.8	784.131	148032	255600	2399.57	86347	398.195	58.4768	2806.74	27.8814	990.923	148.065
2361.4	5.56381	32364.8	722.217	156527	238806	2584.23	99771.6	402.444	42.9365	2863.66	19.4678	1048.23	128.459
2363.78	2.79741	31838.8	531.587	156440	240540	2269.72	98331.1	416.919	46.552	2889.05	23.0265	908.263	110.503
2366.16	4.14256	33405.1	675.283	149187	256261	2377.45	82516.2	371.616	37.1003	2677.54	22.9472	948.203	136.942
2368.54	6.3604	33307.8	564.008	150414	248573	2408.05	92777.6	434.392	46.9553	2561.65	29.8422	1001.93	141.116
2370.93	4.2001	31139.5	636.502	145097	255840	2372.03	90770.6	431.295	49.0011	2714.42	18.1099	986.411	139.514
2373.31	5.02702	29817	624.548	144534	255563	2276.44	93028.3	414.472	35.5028	3132.82	16.582	931.814	127.122
2375.69	7.21922	34418.2	628.658	162728	235571	2596.51	94314.9	463.124	49.1417	2944.45	28.6295	1026.47	136.963
2378.08	4.33347	33709.5	589.605	147206	253878	2181.41	88676.4	421.776	44.1709	2750.64	24.7996	975.009	109.507
2380.46	3.96313	33456.2	571.249	156045	242334	2419.36	94241.6	453.081	53.6822	2993.01	19.6441	881.949	141.136
2382.84	4.88497	30194.5	661.953	160390	240842	2343.47	93877.2	399.289	42.1536	2767.57	20.5828	1086.19	120.948
2385.22	4.30502	35941.9	659.914	149122	251234	2524.62	87547.6	447.212	47.7066	2712.99	19.3882	1024.36	132.221
2387.61	4.08991	34805.9	717.933	158294	238736	2554.65	95021.1	449.749	46.9095	2986.17	24.9234	1007.68	138.921
2389.99	6.30089	28834.6	600.799	154251	251713	2677.34	86964.1	413.929	39.9739	2565.74	20.3371	897.483	128.353
2392.37	5.77792	34630.1	524.682	148271	252561	2641.56	87893.6	395.325	39.1534	2931.87	23.3669	989.139	120.132
2394.76	5.4399	30495.8	524.672	152632	250547	2431.25	89589.4	377.187	52.7881	2662.24	17.9162	893.425	121.922
2397.14	6.8692	34610.3	663.166	147211	248787	2793.36	94946.9	356.847	42.3828	2781.79	21.098	1046.24	127.367
2399.52	4.55719	34345.3	621.178	149265	247214	2061.5	95433.3	377.586	40.2385	2925.21	13.0812	970.533	127.839
2401.9	2.72351	33565.2	642.418	144668	256584	2270.92	88414.3	296.748	46.7226	2486.22	24.9593	902.524	115.747
2404.29	4.66288	32348.3	717.074	152836	249430	2414.41	88801.8	424.512	50.8824	2716.04	29.9828	1014.4	130.104
2406.67	4.68726	33614	622.093	144009	255081	2266.49	91435.7	410.239	46.0886	2476.47	27.1022	921.266	117.144
2409.05	6.36742	32290	545.863	148975	246936	2597.71	97822.2	392.779	37.5972	2867.33	22.5504	1064.26	106.124
2411.44	7.41636	32456.9	670.014	157698	245822	2446.43	87779.7	407.008	44.618	2658	23.2507	995.547	122.641
2413.82	6.51825	35910.2	697.192	177287	220458	2493.32	96423.3	452.187	40.3861	2841.1	20.3411	1067.61	134.721
2416.2	6.33122	32333.7	669.61	156800	246885	2452.49	87575.1	459.093	45.0093	2479.8	25.7313	994.926	131.824
2418.58	2.679	31736.4	626.611	142802	257285	2573.88	90553.7	411.476	55.9183	3153.29	21.3782	973.85	130.305
2420.97	4.02426	32533	643.158	143490	254629	2106.66	93874.3	417.312	44.1434	2500.12	18.6468	996.019	145.283
2423.35	5.70836	31648.9	664.246	158860	240731	2466.22	94357.5	435.927	51.5188	3020.04	26.0049	1027.52	128.558
2425.73	8.68318	34690.8	648.976	154706	248438	2451.79	85821.4	441.26	46.1216	2452.59	29.3227	988.841	138.236
2428.12	3.27262	29242.4	483.736	124733	282917	2135.55	79610.2	367.661	43.3298	2386.87	16.8868	849.64	103.768
2430.5	5.61749	33705.5	496.655	150125	256650	2407.22	80463.3	431.231	54.2975	2747.29	18.1502	891.324	121.786
2432.88	4.92905	35340.7	616.933	153050	248845	2255.11	86709.6	408.104	51.2701	2908.63	22.6343	929.272	118.477
2435.26	3.2995	32986.9	627.669	152250	240223	2593.73	103063	483.728	54.2398	2699.68	23.615	892.358	125.444
2437.65	6.0622	32080.7	648.396	141625	251786	2627.32	100775	407.016	42.4895	2485.71	27.0344	978.966	116.828
2440.03	5.54385	30677.5	711.805	139293	265862	2536.5	83613.5	427.87	51.4023	2655.97	22.5504	938.678	107.453
2442.41	3.86245	35009.4	628.198	148703	248335	2557.32	93584.5	389.757	52.8551	2687.22	24.8362	974.628	125.08
2444.8	5.18445	34135.7	617.123	157079	246963	2414.8	85245.1	409.009	42.6011	2863.88	21.2933	890.889	127.074
2447.18	5.26382	29758.4	675.259	154118	250484	2513.59	88135.7	414.894	42.5117	2588.08	17.0025	933.125	127.926
2449.56	5.19422	34310.6	629.17	158384	243958	2626.35	87248.2	427.486	53.0279	3225.21	23.4929	981.612	152.798
2451.94	5.05497	37504.9	660.21	153039	246095	2511.88	88496	404.142	53.7189	2871.94	21.4888	1060.74	120.086
2454.33	4.79134	33074.1	623.528	155398	245091	2614.09	91162.3	397.713	43.6461	2889.37	17.8779	959.286	116.848
2456.71	5.24194	31560	712.054	161184	246699	2717.02	81938.9	453.817	40.9914	3005.04	20.3534	984.976	144.518
2459.09	4.86919	33495.2	587.894	163482	242569	2417.57	83732.5	354.155	46.8709	3117.32	19.5466	962.15	131.748
2461.48	6.72006	36401	667.42	158552	237331	2633.93	95517.4	380.575	46.9248	2868.62	23.8583	933.504	150.321
2463.86	4.06953	32139.3	725.989	155755	252943	2419.75	79667.2	422.484	46.4195	2741.5	25.4509	1019.24	120.575
2466.24	6.10905	34010.4	695.924	162555	238302	2369.51	91028.1	501.927	46.4526	2831.61	28.2545	927.608	135.315
2468.62	3.91512	32176.7	709.323	160026	246528	2455.26	83629.8	471.342	47.6006	2746.81	24.8101	976.154	124.719
2471.01	6.10302	32901.1	682.595	158427	251075	2287.86	78148.1	421.289	44.2961	3015.93	19.6918	956.817	124.325
2473.39	4.55586	33136.9	602.742	144638	254644	2351.68	91431.1	358.262	44.932	2688.48	24.1923	1027.16	134.308
2475.77	3.05621	34930.2	764.362	159041	239701	2498.28	92657.9	401.721	45.4665	2775.11	35.136	1015.34	129.578
2478.16	4.12692	34171.2	797.806	148488	253448	2279.25	86874.8	464.604	51.0987	2622.2	23.1392	969.425	133.403
2480.54	7.61433	32969.6	784.188	151908	244833	2656.3	95453.8	444.08	50.4205	3471.53	26.2855	1030.61	143.56
2482.92	3.28822	33437.4	572.574	154803	246203	2192.49	90419.7	437.202	44.5286	2740.85	22.1535	962.263	121.497
2485.3	3.72308	31332.7	519.685	160948	242466	2597.27	89383.9	370.96	40.8806	3067.37	22.9066	920.268	134.685
2487.69	6.25761	29752.8	555.045	154512	254032	1833.66	83077.5	374.602	50.8728	2480.48	25.6877	901.093	117.285
2490.07	6.37798	33923.9	545.058	143477	255806	2545.63	90656.3	354.006	45.087	2401.08	25.5668	997.405	133.438
2492.45	6.75845	33110.9	583.98	143759	254470	2524.63	92480.6	426.122	50.7982	2950.82	20.7269	1000.77	130.034
2494.84	5.08161	36372.1	665.805	150997	244501	2608.91	94468.9	405.973	44.1156	3239.18	25.0298	908.006	143.199
2497.22	6.11986	35556.6	696.837	165761	231772	2611.63	95321.3	372.679	48.253	2514.63	23.8435	1056.57	136.846
2499.6	5.00808	31011.6	682.544	151481	253772	2509.98	84847.3	466.689	45.5973	3057.93	28.9453	1035.99	146.656
2501.98	3.63074	35461.8	666.776	157037	238317	2421.94	96840.2	401.466	43.6255	3109.62	30.0122	1035.71	115.237
2504.37	6.08953	32052.3	568.114	157027	249414	2593.38	83420.9	442.259	29.7636	2793.21	21.9341	1017.28	109.995
2506.75	4.96895	30975.4	720.299	146299	251664	2440.58	95307.1	387.564	38.0235	3066.38	23.7943	966.581	107.222
2509.13	5.47252	33760.9	543.581	148852	253863	2671.31	85767.7	448.77	52.9622	2987.9	21.9398	978.908	147.906
2511.52	6.19238	33109.4	513.731	152033	250877	2286.63	87105.2	398.532	38.9085	3089.95	21.6979	894.19	119.197
2513.9	7.0342	33922.3	735.229	143072	261068	2268.28	82679.5	493.194	47.7921	2826.68	25.509	925.273	123.947
2516.28	4.36737	33731.8	665.127	160331	235400	2445.59	98832.9	434.705	47.6426	2715.6	40.1388	995.479	129.734
2518.66	4.99883	30855.3	704.591	141733	259569	2483.35	90007.1	413.208	51.3728	2496.18	24.9494	886.276	136.766
2521.05	4.29894	31964.8	610.582	142969	251317	2873.77	99180.1	441.61	55.2959	2909.02	22.2438	977.934	125.464
2523.43	8.33791	32366	667.599	157309	247570	2526.94	85315.6	502.373	47.9261	2845.3	30.9644	1022.09	144.948
2525.81	5.84021	31845.7	496.683	189839	226391	2201.33	75221.2	375.114	37.1738	2726.12	19.6672	834.796	115.657
2528.2	6.88735	33185.5	722.83	153706	248775	2622.74	87557.7	406.606	43.6409	2939.56	26.7626	903.027	123.229
2530.58	3.709	33677.4	814.955	144496	256232	2284.65	88565.3	324.975	47.5062	2667.45	21.7834	983.539	149.405
2532.96	5.13959	32930.6	630.855	142888	256410	2496.72	90936	453.552	40.3504	2843.07	28.2752	962.761	130.224
2535.34	3.87484	34476.7	659.479	152215	241733	2592.87	99003.1	422.007	43.3035	2963.27	26.6253	1063.59	148.38
2537.73	5.70969	37858.2	690.412	151803	245062	2612.36	91257.7	403.439	48.8661	2883.03	18.4089	1059.73	146.666
2540.11	3.97628	32767.5	631.547	137097	265819	2348.66	84693.3	379.901	37.1707	2893.42	21.2911	980.463	127.707
2542.49	5.85387	33079.4	620.349	153423	247618	2660.44	90186.4	353.961	47.9762	2665.22	24.7524	920.82	137.949
2544.88	4.52398	31919.1	917.741	148269	256245	2481.75	84564.9	366.014	42.6063	2950	19.0887	994.967	117.749
2547.26	3.83497	36729.2	578.643	155488	243598	2530.38	89515	372.375	47.3926	3286.37	24.597	1026.85	133.69
2549.64	4.86523	34539.9	555.825	130664	267455	2451.88	89417	404.073	38.5753	2647.93	22.3728	938.02	107.571
2552.02	6.20692	31456.2	561.335	150126	254719	2375.44	85614.2	402.72	38.6481	2625.02	25.7609	972.064	124.685
2554.41	3.63926	29011.1	565.146	151038	252772	2486.3	89545.3	439.589	43.0378	2703.83	25.2142	918.075	123.124
2556.79	4.86756	34424.1	660.086	144291	253191	2413.34	92715.9	403.145	49.5649	2727.35	28.6621	969.304	128.289
2559.17	3.81875	30034.4	595.372	145196	254605	2443.4	93393.6	443.116	53.2609	2829.34	28.4208	1077.62	108.344
2561.56	4.28231	33017.3	535.306	147796	256488	2586.16	84441	375.479	42.7207	2703.41	21.7481	876.468	130.412
2563.94	4.17661	29011	551.188	131369	267153	2468.65	94293.5	390.742	47.1205	2600.96	21.4523	925.32	126.84
2566.32	2.78721	35386.8	634.93	147223	249048	2612.9	94191.9	408.2	39.3566	2486.18	28.6804	1028.88	136.017
2568.7	3.52252	31468.8	630.112	151474	246584	2760.49	95338.1	434.435	59.7886	3023.89	23.6059	1013.29	144.233
2571.08	4.33522	34768.9	617.618	154959	246308	2376.27	88181.7	451.814	45.7178	3107.09	30.136	962.409	131.724
2573.47	5.71596	32284.8	637.191	145747	255074	2459.92	89710.7	588.566	44.8172	2756	18.088	935.759	129.004
2575.85	4.75581	32730.7	597.775	146711	250567	2416.86	95041.9	396.129	55.3437	2876.47	26.4384	973.138	108.36
2578.24	4.34756	35105.4	703.715	145672	251580	2690.87	91765.8	448.372	39.2214	3369.67	26.848	918.578	142.116
2580.62	5.4134	33197.1	580.278	147521	247124	2811.71	98102.1	447.061	41.7361	3182.37	25.5828	973.828	123.396
2583	9.23704	37849.5	651.947	156591	238016	2774.25	95220.6	421.348	45.2161	3166.53	23.0131	1076.21	95.1914
2585.38	4.37249	31124.7	482.66	145648	253432	2307.05	93909.6	377.307	48.8886	2944.72	19.1335	887.992	122.413
2587.76	5.11624	31218.2	555.94	151126	248782	2662.72	93063.7	453.26	48.9756	2892.1	18.4064	951.412	94.6657
2590.15	8.0277	35260.9	602.24	151378	249400	2638.91	87994.1	424.141	50.7839	2690.21	25.7981	992.994	129.484
2592.53	3.01778	33528.8	559.816	143588	255156	2299.89	91475	368.181	47.4554	3086.05	23.3034	955.439	125.959
2594.92	5.25469	32247.7	570.867	140170	256275	2687.7	95005.3	408.891	44.2204	3299.39	24.1426	985.107	114.776
2597.3	6.10762	30331.6	724.132	143661	259579	2396.83	87903.9	408.54	45.2889	2528.98	28.9115	919.741	122.81
2599.68	5.27232	30023.1	649.155	131642	270953	2366.3	86889.3	453.788	44.4775	2817	25.5272	857.643	129.051
2602.06	5.20085	31192.8	521.955	157508	241399	2437.02	96413.3	415.844	51.4137	2442.36	28.108	935.684	144.496
2604.44	3.95968	32479.8	739.708	150001	248749	2661.22	93182.8	351.063	46.0376	2980.34	22.4597	1004.45	114.186
2606.83	2.22694	36624.6	643.363	143435	252736	2247.86	92940.4	354.256	51.9356	2443.62	22.8428	977.832	112.003
2609.21	5.37794	30607	590.734	145979	252551	2290.12	95484.5	420.489	58.4152	2437.79	21.1933	1025.19	118.796
2611.6	4.96691	32317.6	508.245	145565	259421	2527.93	83786.1	392.451	37.2096	2605.6	26.1298	891.948	124.51
2613.98	3.07248	31705.4	607.238	150427	252041	2462.87	88818	443.859	55.2582	2709.57	29.1025	945.168	120.591
2616.36	5.00951	39067.2	585.091	155105	240899	2955.55	91566.4	490.415	58.8409	3100.51	24.2758	1000.44	140.826
2618.74	4.40562	33056.2	665.628	143350	255185	2446.94	91855	497.584	46.8716	3017.91	22.6052	962.387	127.471
2621.12	5.33124	33455.1	616.576	143254	254816	2759.12	92525.2	420.825	49.0536	2561.26	23.3288	890.201	122.052
2623.51	5.76719	31341.7	563.989	131501	270235	2333.79	86961.2	373.289	50.9103	2939.44	21.2615	941.029	111.936
2625.89	5.09995	35792.4	624.104	151579	251086	2305.88	84499.3	383.506	48.6222	3200.72	26.2816	962.286	135.964
2628.28	3.67819	33207.5	614.868	149184	244168	2548.24	100667	422.656	50.7762	3042.5	27.5473	1015.26	123.32
2630.66	2.26449	36580.2	596.406	151233	250779	2715.98	84637.2	409.245	39.6809	2958.63	22.8968	888.106	123.663
2633.04	5.05221	33975.4	720.472	150441	252071	2450.43	86249.9	392.983	51.2179	2969.2	27.0856	968.464	118.005
2635.42	3.12069	32810.5	661.053	154550	245169	2469.79	92961.1	408.747	41.4174	2437.15	23.1668	908.804	124.941
2637.8	5.05689	33003.7	629.314	145172	253564	2735.52	92097.5	490.659	50.8981	2612.12	20.881	965.7	122.672
2640.19	5.12578	38074.8	630.531	141708	253576	2772.24	91463.7	428.505	47.1092	2989.52	25.8179	1067.33	140.178
2642.57	3.58188	32189	597.766	140599	261540	2516.73	87115.2	437.935	45.3854	2793.57	22.048	828.786	112.459
2644.96	3.79524	34332.3	525.919	155409	248148	2427.98	85066	428.264	43.9055	3349	28.189	939.291	143.623
2647.34	5.83413	33619.1	693.924	143498	257733	2273.08	87252.6	381.559	48.8152	3195.18	24.4279	1032.58	116.394
2649.72	5.24159	29473.6	554.579	153024	253192	2510.14	85777.1	422.562	48.2585	2704.86	23.7858	934.109	111.335
2652.1	5.24211	32444	608.263	149393	252930	2254.06	88532.8	378.064	44.989	2586.6	34.4424	924.778	120.56
2654.48	6.13216	37079	622.143	153840	247434	2520.9	85980.4	416.974	41.2811	2730.95	20.3847	982.317	152.518
2656.87	4.96302	31668.1	635.784	149671	252662	2591.94	88490.5	470.667	37.6328	2884.74	23.3424	1090.05	112.195
2659.25	5.93939	33854.5	616.24	148528	253605	2384.57	86928.6	388.207	47.1455	2775.04	34.3459	1010.01	120.632
2661.63	3.85029	35293.2	654.858	141875	255987	2776.12	90478.2	393.337	54.9047	2876.02	27.2677	925.853	117.485
2664.02	4.05223	30552.7	633.944	135335	268148	2433.11	85726	430.087	47.2543	2704.77	19.9609	928.184	119.13
2666.4	6.7255	31697.1	671.708	158857	246020	2650.47	86064.4	369.825	51.9075	3251.9	18.418	891.528	104.875
2668.78	1.76605	35487.8	550.944	146724	251187	2468.41	91698.8	386.348	43.449	2625.34	23.6807	942.953	130.95
2671.16	5.6036	32486.4	559.338	142178	256773	2670.32	91479.2	386.104	49.5352	3148.75	27.738	966.878	142.329
2673.55	5.86476	32865.4	654.167	157733	244628	2656.58	88786.9	459.974	42.8735	2814.35	26.0565	989.978	141.169
2675.93	5.93987	35496.1	673.155	151776	253199	2672.73	81527.5	421.407	53.2798	2461.41	24.2188	983.529	135.602
2678.31	5.39807	32090	553.242	154423	247859	2619.65	89054.1	396.308	42.8394	3181.7	29.0961	894.12	113.78
2680.7	4.98843	33455.6	582.262	153118	248213	2685.53	88947.6	470.253	43.4674	2922.05	21.5521	964.662	136.323
2683.08	6.77042	34094.6	564.391	147988	255492	2438.6	85034.6	399.494	38.9239	2354.23	23.8694	889.223	136.383
2685.46	3.91998	33319	569.937	143487	258680	2489.12	86256.7	397.906	51.9183	3079.88	21.0344	912.341	122.208
2687.84	3.40309	34617	556.522	146491	248599	2557.06	96547.5	456.665	40.3979	2830.22	22.7345	829.404	135.662
2690.23	4.03456	35975.6	706.48	159549	240828	2624.08	89465.4	436.189	50.8992	2491.36	24.1517	968.648	129.138
2692.61	4.681	33591.8	550.713	161333	243347	2353.57	85752.9	357.108	45.6787	2794.58	25.6336	936.647	141.794
2694.99	3.24546	30101	548.983	143811	253638	2529.11	96912.1	362.434	42.3661	2769.76	29.7659	975.14	100.934
2697.38	5.7319	34057.8	621.675	147404	245403	2263.87	101010	448.943	47.2157	2577.11	26.4851	993.128	131.89
2699.76	4.29667	34198.4	645.408	139438	255812	2724.71	95001.4	408.417	42.6092	3037.75	21.7568	926.827	107.186
2702.14	1.43753	30947.8	640.592	158894	246563	2237.49	86945.6	458.121	37.9003	2301.9	19.0574	1012.36	154.152
2704.52	4.04742	34842.9	623.535	147318	245768	2341.07	99142.6	332.084	42.2561	3400.47	22.7368	1006.96	108.956
2706.91	7.24596	31900.7	645.898	150041	245254	2509.83	99382.9	407.475	44.1677	2843.34	28.6117	906.306	142.165
2709.29	6.15981	33698.7	578.16	152158	249923	2625.38	86927.4	415.647	40.2293	3519.77	29.1121	1003.75	137.847
2711.67	5.85545	36820.6	514.618	144317	251415	2502	93303.7	430.446	43.4768	2619.87	18.8169	917.322	131.103
2714.06	3.37766	32587.5	499.304	148782	261256	2154.57	76651.1	358.587	35.4627	2770.88	19.5566	853.544	109.823
2716.44	5.98143	33890.4	767.674	155333	241453	2509.94	95571.1	459.648	48.0258	3183.85	25.3379	971.55	125.591
2718.82	6.69795	32044.5	686.629	146906	252402	2730.49	92368.4	329.599	43.1417	2923.6	24.7884	886.537	121.228
2721.2	6.51841	27846.1	661.163	150070	253611	2211.56	90882.9	463.729	47.8937	2611.97	25.0786	908.426	107.214
2723.59	5.63044	30963.1	626.262	147036	258708	2338.19	83816.5	398.836	38.43	2975.39	18.421	961.984	126.101
2725.97	4.54527	31430.3	675.992	157076	252217	2599.62	79942.3	421.662	49.015	2419	16.8675	940.785	127.417
2728.35	3.61139	31304.2	615.622	141064	268363	2471.05	77459.1	406.711	43.4602	2206.16	14.1076	876.456	127.193
2730.74	3.82314	36261.3	540.861	152878	248980	2555.63	85893.5	351.564	36.6406	2679.16	24.4163	997.349	145.032
2733.12	4.08698	33217.6	580.571	141471	249697	2583.42	102686	484.931	35.5023	2938.4	17.1431	982.412	142.546
2735.5	4.87857	35835.1	607.463	149989	253775	2794.46	81787.6	526.478	52.5956	3373.87	24.9047	925.835	142.06
2737.88	3.74553	34055.3	558.896	145030	253816	2332.62	91076.9	400.307	39.0225	3033.16	21.1816	921.195	142.091
2740.27	6.00657	30036.1	609.029	140833	264079	2123.27	85465.8	386.633	38.3499	2701.3	16.0529	818.705	128.489
2742.65	7.90039	31929.6	488.691	136973	265972	2500.41	85456.4	368.36	44.2261	2904.57	26.9343	981.494	130.354
2745.03	5.03252	33282.6	633.133	161838	240751	2837.09	88890.8	407.842	45.2793	2614.96	25.2524	991.579	131.383
2747.42	5.07956	34050.3	536.632	142748	254943	2731.29	92324	477.085	49.6095	2661.16	23.9098	956.691	147.048
2749.8	3.83878	33738.3	643.756	151305	250098	2381.28	88272.4	399.374	34.2109	3185.89	23.5707	992.432	117.124
2752.18	5.15063	32992.7	728.208	141441	260593	2459.93	86246	331.187	45.803	3071.7	17.1937	1014.37	131.281
2754.56	2.58682	32102.2	550.285	147558	255334	2233.97	87541.2	455.784	48.9079	2774.21	21.2862	871.913	121.414
2756.95	4.73397	32269	666.95	145695	259157	2627.96	82986	363.167	45.3444	3490.35	22.5663	937.829	99.3725
2759.33	3.61059	33283.8	615.067	139594	264621	2618.94	82465	421.231	46.5499	2824.79	25.8214	917.949	168.742
2761.71	7.1575	33921.7	655.729	137941	264576	2146.81	84623.3	429.784	48.7707	2725.04	22.9641	865.329	177.254
2764.1	4.894	32520.4	543.763	139932	259372	2519.29	90905.6	423.782	44.7087	2896.92	23.9412	923.407	118.659
2766.48	7.20672	35195.2	664.799	153699	242735	2447.47	95258.4	372.056	51.2175	2736.3	21.8643	951.273	136.697
2768.86	4.57638	34492.3	773.516	157034	237824	2600.86	98566.8	427.45	39.6703	2730.49	30.2194	1008.65	150.814
2771.24	3.2378	32938.6	603.744	139940	261418	2402.35	87263.2	437.806	41.8601	2948.93	22.8217	1002.47	125.71
2773.63	6.68479	28801.1	543.057	151939	244653	2775.1	100358	458.931	48.3536	3017.59	25.2544	970.445	123.602
2776.01	7.52138	34965.2	638.252	138639	254336	2626.38	97361.3	392.771	50.8751	3349.55	22.1613	981.416	112.737
2778.39	3.5313	37376.6	581.259	151798	251685	2529.05	81915.3	386.662	44.682	2946.61	15.8306	906.089	134.404
2780.78	6.48057	34271.8	579.812	147835	253559	2345.8	87941.7	340.447	56.8445	2551.05	27.1282	908.95	136.043
2783.16	4.60791	33393.3	642.011	140771	257520	2663.04	91821.1	434.703	40.0577	2587.65	21.9516	893.504	126.666
2785.54	4.41756	35123	597.877	168919	231665	2697.32	91239.6	482.04	53.0816	3006.52	14.851	916.865	115.827
2787.92	7.23723	34718.5	646.558	155829	243651	2481.74	91344.9	445.267	41.8717	2747.13	25.731	942.019	140.99
2790.31	3.45617	32971.9	568.674	150833	253175	2645.98	85360	475.109	45.6439	2433.7	23.2833	1024.04	129.631
2792.69	4.70159	35636.8	673.637	160575	237534	2542.89	92949.5	469.692	40.8681	3052.71	24.6116	1041.49	118.523
2795.07	4.92355	33288.2	558.875	156767	249037	2328.04	83722.3	351.225	49.0724	2655.71	18.1642	880.982	125.372
2797.46	7.74121	30401.5	554.332	143474	251071	2488.19	101184	438.081	47.1742	2502.4	21.0788	942.335	134.446
2799.84	3.89291	34037.3	601.084	142060	254828	2658.49	93547.3	380.64	42.8278	2672.08	20.4056	981.133	118.027
2802.22	2.82507	32932.9	549.298	159137	240928	2429.19	92902.8	378.219	38.5027	2918.4	26.0459	891.404	134.822
2804.6	6.40654	38026.3	661.194	146711	250077	2473.16	91051.6	347.424	44.4533	2494.9	19.6362	857.383	151.558
2806.99	5.73415	32979.6	541.814	144403	262941	2319.49	79744.4	350.489	37.9146	2406.8	20.7054	862.701	114.37
2809.37	6.05344	37044.6	627.71	150334	246008	2749.58	92462.4	392.899	43.8044	2961.74	25.404	1075.52	144.674
2811.75	4.23537	33615.6	637.731	151306	250603	2494.48	87978.2	406.637	54.3269	2754.17	19.2644	912.172	104.33
2814.14	5.31753	34054.5	528.488	143689	257627	2745.97	87062.3	374.847	40.3097	2743.93	31.3808	885.244	132.845
2816.52	4.92453	32618.3	578.321	139503	265189	2561.45	82543.1	390.185	39.6407	2765.7	24.3763	961.058	130.233
2818.9	4.00837	35087.5	647.393	148106	252735	2822	87251.1	434.345	48.281	2727.9	22.302	961.711	142.758
2821.28	5.27827	33580.3	608.247	157559	246177	2808.64	86321.5	461.329	42.1378	2398.62	22.6215	940.247	134.354
2823.67	4.53353	36195.7	534.464	149331	245616	2692.83	95541.5	349.306	43.7665	3014.17	16.228	920.191	141.273
2826.05	5.59999	32464.9	581.531	148637	248793	2374.73	95407.5	404.91	42.7258	2924.88	30.5571	982.155	109.827
2828.43	4.70066	33531.2	598.451	156108	240485	2468.89	96916.3	493.318	49.7364	2818.48	22.6915	951.22	108.361
2830.82	5.07343	33276.9	613.926	150061	251290	2691.2	88309.2	334.49	48.3893	3225.39	24.3194	1037.99	143.857
2833.2	7.27656	33227.4	720.666	150733	251432	2566.47	87613.1	419.506	47.837	2733.45	24.6251	997.418	121.724
2835.58	1.84652	34722.8	611.142	142971	262757	2481.88	79396.2	399.232	45.5932	3004.36	27.4925	913.185	121.238
2837.96	3.19367	31706.9	578.004	141197	263655	2407.3	83694.5	367.049	39.8842	2812.33	20.0524	874.376	108.799
2840.35	4.348	30845.7	735.458	145513	251730	2388.16	96773.6	412.999	39.0942	2686.13	25.2693	912.885	119.183
2842.73	5.20858	37541.3	685.314	155065	244786	2595.61	87632.5	441.507	64.9949	2790.78	18.0069	1069.07	130.617
2845.11	3.86035	34927.6	653.09	148122	250458	2400.18	91520.4	336.092	39.281	2547	29.907	975.369	109.472
2847.5	2.87504	33148.6	534.227	149090	254815	2671.49	84645.1	382.541	39.3538	3103.41	21.0977	927.137	124.043
2849.88	5.85751	31843	636.248	132019	272202	2659.22	82504.5	409.366	42.032	2829.38	30.3533	888.939	115.114
2852.26	3.48108	32323.5	622.444	145497	258386	2295.23	85436.6	415.471	43.8118	2642.91	19.4958	923.487	121.064
2854.64	6.14214	33283.5	518.126	149904	254688	2439.82	83606	361.639	46.6016	3347.52	21.4864	938.322	126.424
2857.03	7.09117	34603.8	562.019	154354	240407	2509.39	97692.5	489.69	50.0015	3460.72	22.0913	1043.32	132.448
2859.41	3.93419	35906.8	639.573	156639	243704	2821.72	88541.6	485.247	45.9275	2966.25	17.0912	909.229	126.074
2861.79	6.26468	37676.6	633.378	148979	246857	2747.2	92247.4	447.895	39.8142	3146.55	25.7573	979.459	122.974
2864.18	4.92402	34503.5	531.997	146721	253717	2221.13	89400.3	330.395	43.1361	2375.89	19.1939	851.11	120.167
2866.56	4.44922	37437.3	683.024	153766	242054	2560.9	93704.6	414.929	49.0737	2946.53	22.3593	934.777	137.568
2868.94	3.34932	35517.1	583.509	150591	250062	2613.87	87878.5	440.834	54.8528	2712.71	24.9355	912.528	123.595
2871.32	4.7739	31974.1	619.139	150853	250175	2412.27	90348.5	522.942	35.978	3181.51	19.3196	963.682	117.758
2873.71	4.77801	32047.8	553.679	154278	248614	2483.48	88400.6	429.626	38.6052	2901.71	24.5796	982.642	117.845
2876.09	3.81352	34956.6	637.942	146585	249926	3124.26	93765.5	376.497	41.561	2613.17	19.9562	850.352	126.451
2878.47	5.50916	32863.9	704.65	146709	257306	2749.61	84033.8	419.72	42.2954	3050.39	22.6008	952.433	119.837
2880.86	5.02799	31466.1	704.622	148494	252044	2647.45	91363.5	420.724	47.1897	2682.29	30.0864	1009.45	143.341
2883.24	6.957	34266	701.72	147654	251262	2890.85	90767.9	391.051	44.23	2799.94	17.6833	975.974	129.306
2885.62	5.10907	33608.9	585.941	150097	249976	2528.72	90652	336.55	48.6495	2661.08	24.6203	1036.87	129.905
2888	3.24945	30992.1	542.164	136264	261530	2869.46	94018.7	366.941	42.354	2610.52	21.5477	964.932	139.016
2890.39	4.46256	32816.8	605.144	144562	256348	2335.29	89258.2	426.341	41.7865	2741.23	20.0146	890.707	112.289
2892.77	4.42769	36881.8	693.931	155628	239666	2591.18	95220.6	497.793	50.0202	2969.69	20.7064	939.171	129.395
2895.15	6.13007	37848.2	597.443	149204	243978	2664.05	96504.9	434.745	45.409	2864.61	20.9152	1051.67	124.822
2897.54	3.8466	34821	540.026	150598	252225	2736.54	84998.3	452.569	50.6473	2847.91	23.2307	955.516	134.898
2899.92	2.57123	29880.4	557.97	145729	255408	2552.91	91756.5	401.441	48.952	2795.1	22.2998	928.013	115.255
2902.3	5.00502	33425.1	632.754	158891	241567	2581.23	91436	473.087	47.2337	2891.89	25.3593	903.682	143.258
2904.68	3.86389	33748.7	639.09	155421	250156	2602.72	82795.3	402.785	44.9019	2717.39	18.9563	1047.85	129.28
2907.07	3.20009	31844.7	641.977	157659	244594	2402.35	89755.3	416.425	45.8984	3371.77	19.4243	944.208	121.985
2909.45	7.87754	32821.6	586.07	142310	262108	2547.08	83575.2	472.633	38.6524	2410.17	22.4404	881.461	117.95
2911.83	5.77238	36368.7	619.021	154898	240236	2685.01	95781	501.577	47.9922	2961.66	30.4	987.487	140.043
2914.22	6.52764	33308.9	531.651	153965	245667	2414.53	92370.7	406.716	44.2204	2827.69	24.9195	902.138	98.9783
2916.6	4.98422	31652.2	575.32	153547	251256	2553.8	85681.3	417.674	45.1204	2978.09	26.4835	873.801	105.188
2918.98	5.78415	36201.3	607.434	151315	240853	2691.67	100542	407.507	48.5218	2375.49	29.4542	949.647	123.361
2921.36	5.71525	30924.4	584.537	167986	232466	2655.23	95743.1	399.697	45.8146	2675.05	23.5216	940.499	128.147
2923.75	3.98637	34469.7	561.807	143479	255578	2810.71	89715.2	463.101	49.9406	2800.65	22.9028	1015.22	135.427
2926.13	3.96046	33802.4	532.444	141410	256793	3147.79	91212	358.661	43.086	2780.56	25.1952	1015.48	104.106
2928.51	5.96196	35085.3	667.443	145555	254581	2578.22	88248.8	400.806	38.0275	2681.06	22.8699	870.921	114.503
2930.9	4.40141	31466	702.046	148472	248994	2689.87	96016.2	412.984	43.9952	2728.65	18.9268	1000.34	137.756
2933.28	3.98583	33089	535.834	145909	257004	2536.59	85981.3	431.585	47.4708	2717.99	18.625	1010.14	126.257
2935.66	6.36591	31849.2	596.306	157245	246327	2549.79	88259.9	390.096	35.6022	2713.54	20.9478	908.055	119.907
2938.04	4.16702	34215.3	605.209	151431	249845	2376.98	88232.6	440.618	46.0174	2932.11	27.1163	996.49	134.413
2940.43	5.56177	35113.5	581.395	153563	248013	2600.09	87510.9	414.676	46.5336	2592.5	20.0521	948.257	137.466
2942.81	6.53688	30553.1	650.537	147328	255728	2848.5	87751.4	446.386	40.9704	2963.82	22.2433	1074.26	132.078
2945.19	6.06429	35019.3	711.163	156357	239679	2854.96	95738	437.421	47.8727	3053.11	24.2982	961.357	125.584
2947.58	4.47494	33451.1	698.849	154135	246667	2866.82	89332.6	455.472	48.1165	3197.38	27.7616	1051.47	134.18
2949.96	3.9937	28520	528.61	135364	270828	2393.83	83905.5	442.496	46.7353	2509.35	22.9321	887.614	117.306
2952.34	4.72523	34578.7	593.309	149553	255436	2579.87	81972	461.864	40.4722	2645.15	18.6269	1001.31	113.083
2954.72	4.41881	35780.6	572.308	166265	235711	2533.63	88723.2	384.556	37.4177	2518.27	20.3525	940.683	124.538
2957.11	6.66368	34666.4	650.331	140050	256418	2450.08	93287.2	387.678	46.2881	2764.69	21.0288	924.175	124.882
2959.49	5.88697	34059.7	544.003	144986	251931	2388.43	94241.1	429.755	47.1926	2706.45	16.0935	922.878	142.205
2961.87	3.68443	36455	608.756	135782	253031	2831.48	101993	429.951	46.1147	2883.33	18.3859	1005.75	139.628
2964.26	5.25324	37663.1	654.841	144398	251384	2671.25	92017.6	468.801	40.4744	2667.87	15.249	944.385	125.293
2966.64	6.61619	30081.5	621.63	143738	256885	2460.51	92083.4	410.606	40.1063	2670.69	17.5236	939.285	132.974
2969.02	5.88871	32864.5	548.146	149696	250151	2554.13	91521.5	367.189	44.6043	2857.36	20.4816	984.881	100.832
2971.4	6.41587	30285.4	573.262	137160	222570	2224.91	154140	373.166	34.4234	2124.28	15.3705	842.626	124.758
2973.78	6.61982	34370.8	545.715	148155	253273	2531.91	87113.1	389.097	40.8294	3097.13	12.0165	1024.49	120.506
2976.17	6.96136	32901.4	758.778	148142	251749	2497.47	90744.5	439.758	45.3357	2988.57	23.7839	951.494	115.472
2978.55	6.61142	33323	590.696	153049	250058	2560.65	86332.4	380.45	52.3849	3160.68	26.4668	973.643	110.39
2980.94	4.73397	36332.8	632.29	143359	252251	2815.69	93435.2	378.008	43.6487	2577.14	19.2571	961.674	144.033
2983.32	6.12009	36209.2	636.343	150561	249494	2800.06	87560.2	481.078	41.7035	2988.7	21.9674	967.651	122.775
2985.7	4.94926	34276.3	668.956	148135	246380	2580.05	97466	425.224	52.3838	3254.9	23.2175	910.031	129.716
2988.08	5.96775	31275.6	531.688	148796	248069	2400.78	96998.2	401.047	39.0794	3472.27	24.1922	955.335	131.812
2990.46	3.38829	33511.7	516.945	155521	242593	2535.34	94684	354.353	43.5747	2882.17	21.4988	897.212	134.922
2992.85	4.93423	39631.3	570.687	153129	245927	2595.62	86678.4	381.281	53.2175	2910.22	20.2402	972.697	129.636
2995.23	6.90317	36140.1	571.126	144635	258576	2356.6	81960	349.971	44.9124	3478.64	23.8318	910.257	111.457
2997.62	2.93134	34782.7	491.15	142966	259852	2408.42	84132.3	335.894	49.9557	2926.03	20.1481	906.28	137.849
3000	5.1906	33842.3	772.862	156140	245266	2639.84	88995.4	408	47.9037	2793.64	17.9462	975.77	137.029
3002.38	4.85971	35478.7	508.968	150521	248125	2539.9	91225.7	364.691	50.8293	2722.85	15.5483	891.746	131.397
3004.76	6.79494	32452	559.989	144524	257215	2542.19	87707.3	479.6	41.8826	3133.86	22.6693	953.82	135.874
3007.14	7.36031	34053.5	635.587	158272	241956	2588.58	91139.6	455.463	44.0943	2815.69	25.3571	936.618	124.777
3009.53	4.85439	32779.8	530.128	152324	252556	2489.26	84645.2	422.923	49.2573	2576.14	17.8445	951.992	135.807
3011.91	3.4777	31301.9	615.366	142086	258710	2326.67	90626.1	427.777	53.2867	2475.15	14.3778	967.54	102.305
3014.3	5.06595	31969.7	586.929	146234	260666	2645.38	80772.2	433.487	42.6843	2917.66	25.5218	914.975	110.033
3016.68	5.39497	35726.2	590.718	147683	250562	2817.39	90494.3	435.922	46.8453	2844.56	23.7656	961.714	136.859
3019.06	4.46137	35100.6	667.007	139488	253087	2763.87	98161.2	424.425	44.7748	2953.8	19.8972	993.514	123.717
3021.44	5.44967	33713.3	685.984	145922	254002	2721.23	89383.1	427.624	51.8262	3054.82	18.7287	905.416	139.532
3023.82	6.11209	39034	608.726	155775	239706	2806.97	92986.5	474.191	47.5489	2676.83	30.327	1050.18	144.351
3026.21	3.98578	31687.1	569.64	139921	252559	2754.74	102289	400.783	49.6879	2493.3	21.0889	946.593	114.453
3028.59	5.61155	36137.3	723.481	154527	241754	2736.15	94012.9	502.539	41.5211	2961.47	24.2982	1007.03	138.337
3030.98	5.01156	33512.2	593.552	138350	251659	3037.56	103454	435.976	46.9587	2643.96	22.8034	1053.19	153.998
3033.36	5.3774	32456.9	572.569	151396	250643	2672.56	88958.2	365.498	40.4816	2684.12	20.0766	882.838	136.962
3035.74	3.59405	34818.9	604.728	146347	249416	2973.43	94824.3	410.991	47.6287	2825.02	21.1639	955.613	144.217
3038.12	2.98953	32612.7	593.362	144999	259965	2207.97	83454.7	397.616	35.8077	2750.7	24.9671	936.597	103.958
3040.5	3.97372	31688.3	511.416	152639	246974	2426.81	93896.5	395.285	38.5278	2610.4	23.602	960.13	117.916
3042.89	5.7449	30322.7	525.379	162696	243351	2188.06	87418.6	347.921	41.5124	2733.27	27.6025	819.917	111.458
3045.27	4.49497	33048	588.447	151164	248204	2235.58	92162.6	362.928	41.06	3411.7	26.8801	853.204	111.333
3047.65	5.01902	32321.9	534.8	148614	251044	2478.82	92308.1	387.481	46.1157	2735.94	21.2159	975.674	108.009
3050.04	3.76127	33462.4	563.813	148596	257877	2536.63	80804	369.713	43.9609	2754.87	24.7995	859.258	109.909
3052.42	6.93993	34633.3	596.441	149787	245311	2673.86	96789.9	402.745	48.9723	2898.79	28.2612	1021.82	124.986
3054.8	3.3183	38160.6	678.086	155309	240235	2608.12	93729.8	431.886	47.6388	2844.92	25.3529	972.627	116
3057.18	4.00954	40284.2	696.242	156489	241199	2932.86	87765.8	415.178	57.9463	3418.74	22.6865	985.981	144.846
3059.57	6.82015	38164.5	602.037	142233	255902	2281.64	87915.1	421.877	39.8283	2793.94	15.9957	899.386	136.458
3061.95	6.23153	34691	643.553	148547	249117	2727.31	92429	315.101	46.3358	3116.56	24.5898	981.767	130.805
3064.33	6.91802	36429.2	545.665	149328	246758	2713.67	92977.9	445.96	42.7873	3431.79	19.493	1005.17	126.74
3066.72	5.14036	32653.7	619.546	130903	272542	2172.09	83031.8	447.41	42.6697	2921.28	17.6513	879.124	125.432
3069.1	2.59978	30507.8	559.165	142173	259960	2447.38	89563.2	399.582	40.3468	2337.33	17.6193	866.194	126.644
3071.48	4.76102	31908.8	588.396	156605	247829	2464.34	86482.9	456.181	45.9722	2979.45	21.6486	930.261	145.597
3073.86	4.85874	33294.6	548.828	146449	257011	2777.3	85024.4	435.614	49.432	2557.26	21.3906	953.458	104.368
3076.25	4.98611	33057.9	559.37	144101	251410	2593.78	96201.7	455.536	50.843	3486.66	19.1384	986.377	135.257
3078.63	3.65087	28790.3	534.793	127818	282927	2052.68	75722.4	442.072	33.3402	2494.45	20.7502	815.808	103.1
3081.01	3.95314	30799.9	550.977	155082	251741	2440.1	84202.9	403.306	42.5996	2490.8	17.4801	968.527	118.192
3083.4	6.20468	36048.2	616.141	148263	247514	2753.36	94083.2	425.994	44.4519	2768.08	20.8198	1057.08	145.378
3085.78	3.96706	32858.4	625.478	142909	257670	2487.15	89113.1	420.674	42.9286	2793.34	16.8248	1024.03	123.942
3088.16	0.996724	35069.6	615.285	144093	246043	2658.18	103487	376.615	52.1795	2411.19	21.9451	931.095	139.452
3090.54	5.9025	34498.4	600.683	151742	245095	2894.81	94182.8	450.64	50.8389	3131.74	23.2584	989.665	116.598
3092.93	5.58448	34618.4	675.206	148072	251166	2841.41	90067.8	414.703	42.4204	2769.24	19.4994	989.557	138.179
3095.31	5.06409	32307	580.63	151275	256211	2515.54	80572.1	435.99	39.9586	2837.54	23.0655	986.528	127.048
3097.69	5.25369	34479	582.204	149401	249302	2518.6	91740.4	426.817	47.2874	2719.55	21.4727	924.593	120.679
3100.08	4.33923	32878.2	621.333	148216	257739	2767.42	81765.8	398.168	44.4299	2665.91	19.2537	966.431	135.091
3102.46	4.32755	33113.4	563.805	151160	247182	2431.6	93642.3	466.475	42.8936	3066.97	23.4406	927.613	134.597
3104.84	4.82442	33427.5	483.835	156806	253184	2203.28	77452.5	402.006	49.1792	2520.54	21.3018	894.839	109.247
3107.22	8.79624	33970.6	610.079	154471	245137	2824.5	91453.6	412.57	39.6553	2622.1	19.492	1035.36	144.369
3109.61	5.59383	34651.1	573.176	155049	245527	2626.07	89065.3	470.444	49.596	3260.45	16.5305	951.528	123.841
3111.99	5.7781	32358.6	526.263	148273	247324	2324.56	98490.7	414.617	34.4955	2841.9	21.4454	909.652	120.826
3114.37	4.77384	32347.6	519.451	146925	254407	2432.07	89612.1	395.641	46.9374	2613.17	15.5485	945.831	110.529
3116.76	2.87394	34071.1	587.95	158413	243429	2891.37	88606.5	450.216	45.6699	2564.8	24.0911	1045.13	151.638
3119.14	4.33293	36423.6	557.176	146829	256555	2561.35	82245.6	379.945	51.4748	2776.92	19.8526	925.2	120.373
3121.52	7.04175	33371.9	469.357	147869	259443	2587.05	79850.7	397.673	46.1673	2319.62	21.2654	927.259	112.345
3123.9	4.79292	36426.1	703.114	146635	250412	2324.05	92227.9	390.774	37.0804	2482.26	19.615	881.215	131.748
3126.29	4.58365	36264	683.993	134409	261087	2570.5	92096.9	432.927	44.5042	2720.73	25.8499	899.939	116.66
3128.67	3.48798	36281.4	681.386	144426	252691	2575.97	91178.4	455.818	42.0198	2784.59	20.718	1050	124.309
3131.05	4.49742	31401.2	657.163	152862	249887	2640.9	88749.7	370.513	47.7268	2913.73	21.272	1020.5	123.192
3133.44	6.6529	35639	697.649	154785	239219	2389.12	98937.4	372.307	49.4741	2539.43	20.2698	973.8	111.344
3135.82	5.56956	32124.3	710.026	155748	248204	2518.54	86813.3	488.806	48.6694	2733.78	28.641	993.485	118.815
3138.2	4.46403	33699	717.422	153186	251106	2442.2	84980.3	377.054	44.0399	2305.67	20.8237	930.673	104.082
3140.58	5.80036	28929.1	573.263	151415	263442	2511.99	72202.3	363.625	46.0723	3366.06	13.8575	990.585	112.985
3142.97	7.73733	33770.5	623.095	152684	240346	2513.1	101274	399.708	47.4293	3093.92	22.5339	969.547	133.211
3145.35	5.44252	33626.6	712.201	151854	244847	2466.47	95895.7	456.084	40.3698	2685.48	19.5551	984.839	130.965
3147.73	4.32948	32260.4	552.168	148198	248027	2336.23	97514.9	400.398	47.6363	2776.34	26.8278	1045.87	122.757
3150.12	4.6333	35633.3	714.73	160044	240527	2527.54	89064.2	461.884	51.4552	3101.9	25.3336	965.811	132.018
3152.5	5.72007	35359.3	584.65	143075	260154	2412.2	83311.5	359.716	39.3513	2447.85	18.2549	868.94	128.307
3154.88	4.01408	29936.8	633.38	152194	257095	2400.8	80739.5	368.55	41.3102	2475.83	19.5638	942.457	143.61
3157.26	3.86862	32878.2	524.246	141814	260639	2684.47	86766.1	323.73	45.4911	2136.43	15.7588	955.251	115.732
3159.65	5.94939	32725.5	596.005	149688	259816	2550.79	77136.8	375.624	40.8718	2572.05	24.222	885.592	142.049
3162.03	4.53412	30384.7	585.218	140612	267792	2598.12	79215.7	456.085	40.4572	2736.4	16.8912	883.434	109.884
3164.41	5.46749	33206.4	522.956	140320	259967	2298.27	89442.8	417.276	50.9827	2543.14	14.2273	832.212	112.85
3166.8	4.58706	33696.8	641.507	143981	254057	2620.16	92093.3	386.476	40.7361	2984.4	23.6045	1036.01	129.375
3169.18	5.05576	33813.7	580.143	149718	253291	2407.75	86162.3	399.492	46.1203	2460.36	26.2753	985.168	129.08
3171.56	6.19907	33682.4	574.297	158385	242342	2535.81	90949.1	394.551	39.6562	2757.77	21.8921	1005.47	124.63
3173.94	5.98413	29765.1	539.403	140433	268606	2218.47	79538.8	354.506	45.4092	2567.3	22.2962	794.201	99.6582
3176.33	7.41066	33546.2	553.517	145384	259893	2495.55	81736.3	422.915	45.7927	2930.55	25.6351	930.063	106.292
3178.71	5.21946	32945.3	616.355	143273	251756	2586.04	97482.5	382.83	45.2068	2893	26.7022	976.915	127.642
3181.09	2.41351	32769.1	637.035	143563	258813	2668.78	86319.7	385.963	44.4664	3014.98	24.1562	930.096	112.581
3183.48	2.24919	36525.7	692.666	147597	250921	2580.18	89355.1	477.605	47.4752	2748.55	22.5893	1044.74	126.357
3185.86	3.5263	32466.6	525.624	139875	256439	2181.96	96179.2	390.694	42.8811	2633.09	17.4744	857.768	118.362
3188.24	6.38196	33592.8	627.656	137304	257384	2649.18	96334.9	341.895	47.4401	2824.12	20.0495	977.908	159.052
3190.62	4.31176	34582.9	531.746	142140	257594	2386.53	89175.4	375.572	48.7705	2514.84	23.6826	937.287	125.138
3193.01	5.04482	33204.7	559.147	146967	253827	2411.18	89491.9	390.593	47.9918	2665.13	17.6406	1005.52	112.119
3195.39	6.35631	34496.3	726.139	149062	250627	2951	89367	455.543	49.754	2941.99	18.2979	924.567	128.835
3197.77	6.1074	33839.3	544.63	141521	256886	2460.36	91658.3	408.851	51.4963	2622.41	20.0571	865.75	115.105
3200.16	7.68906	33947	661.275	146944	255038	2334.2	86769.2	347.835	45.1233	2935.43	23.0318	941.009	89.6862
3202.54	3.84532	34591.6	742.379	142629	259438	2479.84	84905.7	401.305	47.0311	3037.09	20.3821	865.223	131.978
3204.92	3.91651	34077.8	669.363	153541	249968	2625.23	85160.8	390.329	44.784	2858.44	20.0292	1005.44	140.772
3207.3	6.40268	35867.3	696.53	146507	252319	2715.19	88722.9	435.518	40.068	3441.97	20.0967	918.435	129.494
3209.69	5.2398	31888.4	526.766	127669	277402	2067.63	81225.3	349.48	39.7811	2659.02	17.2856	942.38	108.937
3212.07	3.94957	34935.4	642.185	148900	249676	2670.81	90997.6	430.77	49.7919	2932.91	18.6083	929.568	124.306
3214.45	2.51142	32688.5	630.073	152375	252264	2590.86	84687.8	504.248	53.2253	2706.73	19.8134	956.587	129.992
3216.84	3.14268	36573.3	602.295	141989	257719	2615.36	86768.2	391.941	50.4763	2631.83	19.7958	1067.92	108.742
3219.22	4.93411	31410.6	650.358	144738	254066	2748.34	93616.8	314.202	42.9435	2681.33	23.3258	896.788	133.505
3221.6	4.77879	34790.2	694.631	145002	252961	2455.21	92019.4	451.2	39.4874	2395.4	20.5378	888.444	117.28
3223.98	5.16577	34554.4	659.551	148107	255709	2647.01	83396	365.825	43.8519	2773.44	20.4528	962.734	142.151
3226.37	4.89973	32543.1	729.176	148548	248834	2429.14	95099.2	433.438	39.6379	2949.92	26.3067	967.115	150.66
3228.75	4.74118	34415.5	579.933	149638	254413	2477.75	84324	385.784	43.3081	2165.43	19.3651	863.991	116.781
3231.13	5.22902	35802.7	652.982	151967	245064	2758.58	92799	442.443	45.5592	3122.25	22.793	933.467	113.582
3233.52	3.61665	29365.1	596.362	140249	260755	2804.79	91873.7	326.161	44.9272	2279.37	16.45	840.935	98.7844
3235.9	5.84481	33538.6	570.716	149449	247219	2491.17	95610.5	476.61	46.5439	2765.35	25.7392	1015.8	133.654
3238.28	1.50386	35627.4	573.035	160761	239980	2732.69	89301.4	440.205	37.1467	2797.53	24.8348	915.628	125.193
3240.66	7.26719	35145.7	620.619	159132	243510	2410.79	86399.8	429.336	47.0878	3081.04	27.8946	1046.14	138.251
3243.05	5.61419	29857.2	649.883	142826	257248	2365.84	93163.4	404.98	48.3965	2573.16	27.4581	903.978	97.3138
3245.43	4.81347	35320.1	631.532	152721	244436	2474.26	93568.5	444.011	42.7643	2941.09	26.3207	1001.32	131.627
3247.81	3.26679	31492.8	453.481	138192	264994	2181.55	86294	433.8	34.533	2693.79	17.4772	871.888	105.335
3250.2	4.85353	35543.4	617.372	142038	253685	2365.99	93865.3	345.574	50.0996	2947.59	24.1112	985.543	135.797
3252.58	3.57472	30223.5	627.469	147220	254805	2648.66	90212	414.251	39.9684	2781.42	21.2142	885.397	113.535
3254.96	4.64952	32304.4	619.045	149843	245410	2530.37	98818.3	415.17	42.2914	2988.59	18.3844	1022.95	132.225
3257.34	8.70787	33618.6	634.03	152686	249221	2579.58	88008.1	414.948	43.1284	2678.49	25.5482	1154.07	106.985
3259.73	7.17287	35461.2	674.325	140750	250108	2544.25	100854	405.97	48.388	2917.9	24.0503	1022.38	136.432
3262.11	5.012	31390	700.745	157753	241241	2787.04	94775.4	460.093	44.1767	3280.82	27.0901	989.744	124.144
3264.49	3.36672	35739.1	751.759	156300	244994	2404.43	87410.9	480.237	52.5454	2892.76	18.8135	997.693	120.634
3266.88	4.46197	32991.5	517.448	148937	253586	2773.1	87206.2	377.339	49.7199	2627.05	26.0286	956.436	137.33
3269.26	6.35563	33972.5	601.823	152697	247349	2355.95	90979.5	392.45	36.7235	2650.04	25.0252	926.296	132.221
3271.64	4.49797	37331.3	674.664	139188	253671	2695.63	95727.5	383.08	32.4887	2887.48	25.4375	948.592	124.873
3274.02	5.03801	34363.5	523.805	141171	257246	2308.94	90946.4	370.939	40.5679	2962.68	18.1362	887.283	129.624
3276.41	5.20729	34457	545.899	133717	264952	2308.56	88905.2	466.504	37.7593	2998.27	22.1452	942.074	147.461
3278.79	5.17886	32971	632.142	143758	249030	2857.72	101075	356.355	49.9446	2600.65	28.3046	911.604	120.635
3281.17	5.13135	34397.5	572.687	142438	255352	2382.05	92066	350.886	40.9561	2894.94	28.6759	891.903	108.223
3283.56	4.59233	35370.5	544.219	152279	251526	2567.71	83457.9	423.574	43.2491	2834.69	36.3889	953.712	126.683
3285.94	4.85959	34267.2	635.451	153804	241188	2513.59	98147.1	424.955	50.4124	2836.77	22.9299	1052.13	96.8717
3288.32	3.85716	33427.5	705.914	148251	253408	2310.6	87921.9	439.134	41.9632	2753.09	20.3055	1040.13	125.472
3290.7	5.57667	35339.9	552.8	142409	248649	2578.28	101292	430.998	49.3576	2710.77	20.0681	967.993	131.609
3293.09	3.23022	34914.2	608.322	148967	250961	2696.53	89186.7	408.719	42.8799	2669.9	17.7095	1009.91	128.904
3295.47	5.52755	35737	651.775	154128	244739	2282.14	91421.8	357.909	52.4735	2660.43	20.259	876.954	113.27
3297.85	3.50321	34439.5	642.256	143499	255519	2381.33	90023.3	417.822	38.2975	3044.81	18.5271	892.123	144.62
3300.24	5.33357	32876	661.557	151983	245223	2666.02	95604.7	412.139	42.5784	2932.33	21.4064	962.458	123.969
3302.62	5.1198	34947.8	549.957	151057	250588	2376.64	86944.1	435.417	36.7764	3057.75	16.5967	913.589	127.433
3305	5.09986	32291.5	696.338	149792	250946	2734.41	90036.7	361.592	37.8718	3184.98	24.4015	1018.28	152.419
3307.38	4.96642	34823.7	513.908	140321	261962	2497.6	84498.8	408.111	50.0724	2635.79	19.9304	928.577	131.207
3309.77	3.53392	35494.1	632.796	152411	248289	2863.25	87540.7	440.526	52.6332	2997.08	26.0263	1007.48	123.358
3312.15	5.19458	32933.2	600.692	148808	256193	2768.38	82889.7	370.472	47.0219	3134	28.6943	969.348	134.269
3314.53	3.61579	28135.2	629.416	130138	279172	2278.17	78434	379.47	40.9547	2758.48	18.4452	871.078	105.485
3316.92	6.25428	33307.9	509.1	147137	262835	2394.45	75654.3	363.765	47.3066	2554.76	19.613	943.622	101.999
3319.3	7.47426	30933.8	502.636	149895	256413	2320.72	83305.2	390.395	35.9927	3348.43	24.1258	958.952	142.044
3321.68	6.2699	33355.7	536.607	139929	266097	2405.42	80549.3	353.883	43.8675	2390.87	18.4897	845.034	116.213
3324.06	9.30855	32663.8	591.575	148775	255157	2517.84	85203.4	392.739	49.928	2930.5	22.3011	916.216	138.15
3326.45	6.078	33668.2	646.828	146376	254686	2597.28	87712.3	400.162	45.5273	3241.31	25.4324	971.47	154.099
3328.83	3.90382	34089.4	561.3	148511	254685	2498.8	84923	410.548	39.4195	3019.01	18.9579	896.789	102.502
3331.21	3.43702	34130.4	721.166	154825	247107	2529.4	88048.8	364.881	48.0748	2598.43	20.3993	1020.12	111.407
3333.6	3.46919	30715.1	598.87	139966	262215	2480.19	88660.4	362.957	37.0841	2604.53	23.8938	830.019	105.343
3335.98	3.68871	33330.1	675.709	150040	254458	2688.43	83671.9	529.693	45.7219	2797.65	19.49	890.892	136.703
3338.36	5.903	35996.2	516.91	151662	247542	2626.38	89706.4	405.863	38.4998	2860.92	24.1412	1030.46	127.136
3340.74	4.09339	34248.4	587.954	140944	270143	2371.14	71777.9	412.824	42.6253	2632.12	12.7057	874.842	136.27
3343.13	3.04766	32995.3	649.751	145639	255553	2579.67	88277.1	408.258	50.1965	3053.21	22.4904	928.353	112.963
3345.51	3.10566	34916.2	698.747	158036	243004	2814.42	88979.8	390.25	46.9548	2570.33	22.2179	1038.3	123.752
3347.89	3.16156	37102.8	627.572	150618	252005	2704.07	83538.7	423.143	33.7578	2380.26	27.0214	948.646	109.665
3350.28	6.30697	33641.8	473.449	147525	254555	2770.65	86692	380.289	39.4397	3044.95	21.018	952.769	129.177
3352.66	4.90252	35786.2	672.579	150658	246933	3123.67	91822	408.872	51.7832	2672.19	22.4932	923.743	142.299
3355.04	4.22496	34343.3	619.031	140109	260669	2532.12	87106	366.287	35.227	2654.03	21.7951	965.177	106.397
3357.42	4.89274	35281.6	556.488	154063	240979	2759.87	97005.5	391.9	43.5529	2961.3	24.7426	976.246	111.119
3359.81	4.76257	33922.2	583.191	156066	247204	2558.17	85956	388.313	36.6199	3337.24	25.0787	902.595	118.024
3362.19	4.61507	33177.6	600.747	150524	243930	2741.57	99472	428.158	39.1778	2674.44	17.3421	972.196	143.569
3364.57	3.14307	34067.4	639.541	152177	245313	2360.38	94470.4	340.465	45.7332	2859.06	21.6066	983.597	138.919
3366.96	4.24118	32685.3	661.787	151137	242456	2586.73	101363	423.36	41.5341	2737.48	19.6084	998.672	132.446
3369.34	3.67	32216	514.897	142888	264898	2262.96	79292.7	370.184	40.811	2771.81	18.646	820.861	114.047
3371.72	3.81738	34732.2	587.155	159225	243812	2406.62	87039.2	376.927	57.1099	2377.51	18.8379	981.426	117.894
3374.1	5.31451	31895.5	615.202	146802	253396	2429.88	91579	406.122	42.4385	2649.91	20.1266	940.66	143.369
3376.48	5.37917	35316.5	735.088	147374	248971	2660.52	93859.9	412.77	39.971	2678.59	21.2222	994.178	141.703
3378.87	2.95603	36561.8	664.729	156831	246734	2299.91	83378.6	496.083	43.5682	3076.94	22.6188	856.151	111.137
3381.25	8.95224	33390.2	558.816	176459	228021	2759.21	88527.2	424.521	45.9106	2811.84	19.1781	909.206	133.611
3383.64	4.10213	34898.5	635.208	139607	258841	2324.24	90103.3	420.082	36.6476	2760.97	21.772	859.84	140.455
3386.02	4.48731	28705.5	655.075	161581	248352	2410.17	82276.2	421.67	47.1215	2685.85	22.6797	1014.85	121.059
3388.4	6.44535	38286.3	644.157	150407	251272	2565.42	83568.1	416.41	40.4332	2729.24	19.4	961.138	120.791
3390.78	5.42262	34808.2	557.473	159211	232394	2695.99	103456	459.841	52.6109	3076.36	20.9003	1008.37	128.051
3393.16	5.63735	30443.2	619.504	145420	256059	2274.93	90539.9	389.318	42.4917	3066.47	16.4192	960.896	123.091
3395.55	5.43859	35764.4	633.043	149393	247933	2669.71	91787.7	445.009	48.4395	3108.12	28.9944	1187.89	145.019
3397.93	6.82917	32935.9	567.386	152200	248347	2575.05	90743.8	393.902	45.5929	2865.81	16.5831	965.696	128.358
3400.32	6.63475	35955.4	615.61	150275	247754	2701.85	91345.3	408.506	40.0877	2712.78	21.7291	917.344	121.605
3402.7	5.97408	32467	737.172	150851	253819	2579.71	84394.5	413.482	45.544	2890.28	21.3628	976.596	119.953
3405.08	5.59442	32335.2	650.138	139637	258981	2312.4	92420.1	367.838	43.8836	2700.17	18.6528	883.159	117.616
3407.46	4.25555	34161	741.416	154284	246371	2337.81	89869.3	388.914	41.0601	2770.62	18.3317	977.35	115.598
3409.84	6.55222	36053.8	619.235	146570	253495	2787.14	87400.3	413.992	50.4913	2671.67	20.8397	919.628	145.143
3412.23	4.10824	34395.1	628.9	151525	244794	2271.67	96131.7	398.869	34.2281	2613.12	18.3475	958.976	108.287
3414.61	5.62999	34643.9	559.539	149120	248101	2612.67	93635.4	402.013	55.2032	2807.28	22.553	980.889	121.34
3417	3.3848	32400.7	567.483	143372	260258	2679.44	85033.4	386.297	57.5766	2631.18	31.4281	1039.67	114.668
3419.38	6.50564	33392.9	601.613	145150	257653	2325.04	85557.7	415.669	50.2011	3099.86	19.8018	938.824	111.678
3421.76	3.82244	33983.4	619.359	139342	263417	2301.88	84553.9	419.227	46.3976	2570.64	21.1446	867.656	128.459
3424.14	4.36816	29853.8	696.415	143943	258896	2423.16	88825.8	431.158	43.1162	2683.11	22.3036	982.994	123.806
3426.52	6.17156	30105.4	552.751	142467	262783	2415.99	84959.9	381.412	34.1344	2689.33	17.7119	869.956	134.521
3428.91	6.18787	35169.5	668.704	145294	250173	2757.56	95062.8	408.948	40.7064	2667.6	20.2735	918.48	118.001
3431.29	3.97387	36047.9	525.649	153932	246229	2677.75	88323.4	481.702	38.3744	3087.34	23.7966	945.161	125.128
3433.68	5.13797	33679	604.699	145786	256208	2647.95	86555	408.749	42.3402	2853.47	26.055	971.437	120.97
3436.06	4.46589	33832.1	671.964	155830	242852	2695.33	92725.9	421.386	56.6356	3217.04	23.4816	1035.06	129.602
3438.44	3.35893	30292.1	541.051	144683	257552	2248.11	90129.9	383.707	50.7773	2476.89	18.2703	877.731	119.695
3440.82	3.29422	35986.9	555.79	144794	251892	2869.07	91974.6	419.412	44.5107	3012.44	21.8419	943.717	161.077
3443.2	5.70397	33773.7	671.248	149855	247251	2391.96	94826.3	529.886	46.2244	2669.73	20.2503	962.467	135.917
3445.59	7.17015	31753.3	560.773	155948	241940	2493.33	96715.3	371.218	38.5795	2869.16	22.8037	978.986	121.907
3447.97	5.88175	32712.8	627.288	143321	256295	2707.38	90396.5	373.937	43.3974	3058.96	21.418	1040.03	126.585
3450.35	2.374	34855.2	565.367	168005	232802	2621.96	91114.1	438.658	63.1202	2952.58	19.7499	994.599	127.12
3452.74	3.36404	32715.6	612.627	142145	257229	2548.36	91039.6	388.06	42.5749	2796.95	27.6369	911.957	126.014
3455.12	4.06016	36333	650.217	147807	254122	2662.74	84511.6	402.413	37.3709	2794.65	20.2115	910.638	127.3
3457.5	4.85904	32017.9	524.64	143419	261216	2552.62	84244.3	433.77	41.7165	2366.34	21.5295	1013.57	139.428
3459.88	4.05772	31459.3	606.709	148918	250517	2355.68	93729.8	471.059	37.3047	2490.77	19.0838	905.452	136.912
3462.27	5.52953	32137.9	528.494	139828	256393	2293.07	96339.4	374.781	37.5056	2829.71	21.9888	886.032	122.39
3464.65	6.25188	34711.2	651.133	147464	246791	2410.65	97678.4	453.505	48.4924	2856.52	23.3984	1049.83	168.13
3467.03	4.84859	32371.3	526.596	140609	262192	2374.13	86653.1	418.159	38.4125	2203.49	17.206	882.792	127.269
3469.42	1.95172	30504	537.732	159575	251614	2376.59	78593.4	458.562	40.418	2538.91	16.2792	966.092	104.896
3471.8	8.79863	32894.5	597.657	156159	245387	2677.61	89746	399.236	38.4819	2919.97	19.3995	1016.63	122.022
3474.18	6.63756	35130.9	661.26	148220	248767	2809.61	92617.1	423.293	51.9996	3260.2	21.0924	991.909	130.807
3476.56	3.15018	35615.5	664.677	154338	237083	2597.39	102076	424.791	40.7881	3144.55	13.0911	973.837	128.815
3478.95	5.26955	32172	670.708	154952	244520	2791.22	93463.1	387.324	30.0333	2805.97	22.7389	856.126	142.206
3481.33	4.46876	34101.3	637.555	143325	253644	2602.98	93234	391.322	38.6791	3074.41	27.2022	933.031	135.118
3483.71	3.32907	34479.2	658.213	155632	232109	2589.4	109078	393.808	51.1265	2995.63	27.1335	1095.64	146.658
3486.1	4.99681	34081.7	698.161	138002	261030	2250	89292.1	442.151	44.2715	3038.28	25.1061	991.81	143.415
3488.48	3.77778	39294.1	764.67	138026	255114	2549.25	93233.8	406.952	39.9349	2760.72	23.0658	1036.33	119.969
3490.86	4.97436	32333.3	528.573	132665	263184	2316.2	95658.5	446.087	38.8228	2484.11	26.9675	881.444	114.669
3493.24	5.14239	34283.2	655.826	154282	246991	2509.73	88878.9	413.481	46.4648	2594.24	17.8853	975.346	127.471
3495.63	3.93798	35299.7	630.613	150550	243583	2241.25	98626.1	394.083	44.0528	2384.24	19.6548	970.745	136.901
3498.01	7.00417	32104	545.619	151000	251814	2241.88	88451	425.876	38.155	2680.55	20.3133	813.544	115.079
3500.39	4.26496	32383.3	559.94	143580	257888	2692.89	88466.2	428.231	41.1092	2687.65	15.7858	862.681	115.088
3502.78	3.39393	32708.5	731.61	151448	253297	2452.99	84282.2	406.535	43.1036	2919.97	21.8667	930.896	137.022
3505.16	5.6484	34141.8	619.8	142048	255051	2423.28	93382.6	395.632	46.0869	2613.59	25.1457	925.132	108.802
3507.54	3.85208	33674.1	505.966	148862	240786	2346.4	106674	350.054	43.6983	2599.85	20.7605	965.38	123.305
3509.92	5.3485	30957.6	595.43	147170	255247	2247.14	89255	421.134	43.0118	2698.44	21.5207	963.667	141.064
3512.31	2.23664	35128.4	559.958	136534	259057	2709.51	92991.7	450.282	48.1049	3133.92	26.8101	963.869	122.785
3514.69	4.55357	30971.6	614.612	142455	250311	2551.54	102738	419.297	47.7806	2833.19	24.9446	976.951	132.699
3517.07	3.96463	33860.8	713.93	159887	238690	2563.4	93761	497.591	42.6483	3092.87	17.4415	953.027	126.939
3519.46	5.96915	33712.9	601.798	148873	249182	2433.48	93395.9	409.928	32.1092	2715.4	18.0874	1007.86	120.563
3521.84	6.074	31684.4	605.931	146591	251095	2675.19	95258.4	404.728	49.3269	2744.46	19.0153	996.748	128.859
3524.22	6.42307	30847.3	618.027	143875	261212	2203.29	84818.5	470.516	45.4673	2537.35	21.2221	952.402	113.727
3526.6	6.49572	32320.8	566.676	145643	249478	2384.61	98785.8	457	43.0683	2603.39	17.6378	949.138	157.25
3528.99	6.01832	31171.2	624.969	148080	247215	2543.76	99789	391.692	49.4655	2875.51	20.4525	847.316	123.061
3531.37	5.53304	34342.5	624.294	144958	258700	2688.14	83004.8	472.662	41.9942	2895.81	24.3291	1021.51	128.149
3533.75	7.84922	31782.6	545.581	145493	257611	2395.61	87707.6	381.022	44.0646	2063.02	19.7872	926.414	134.261
3536.14	6.14578	29913.1	671.411	146874	258982	2585.35	84545.6	435.4	40.5117	2660.01	22.4005	1033.28	118.727
3538.52	4.19233	33265.8	683.263	136960	258452	2607.92	95212.5	416.844	44.2704	3067.27	18.5073	922.87	132.961
3540.9	5.22728	31898.1	587.935	148054	257200	2515.78	83923.2	353.032	33.4669	2814.99	21.9394	979.705	132.653
3543.28	4.69204	34100.1	614.953	141881	255546	2329.38	92881.2	450.456	31.3777	2575.89	21.2048	1007.65	128.216
3545.67	3.67621	33979.8	592.256	144291	257320	2493.77	86744.7	404.09	34.8218	2817.36	21.1229	1013.3	125.447
3548.05	5.7593	35170.2	634.513	157271	244698	2505.61	87095.6	526.523	42.9134	2950.13	22.8736	922.536	137.566
3550.43	5.219	37014.7	638.663	140268	255667	2600.7	91728.3	409.595	46.457	2732.97	23.4456	972.657	120.452
3552.82	5.21094	33757.4	634.768	142966	257345	2302.29	89156.3	414.42	39.388	2536.21	19.8544	912.272	117.349
3555.2	5.71407	33761.5	619.882	158398	242633	2693.97	90001.6	364.29	47.9707	2982.52	18.1217	1059.77	123.851
3557.58	2.96777	32948.4	567.702	148542	249320	2571.07	94430.6	375.856	44.5586	2699.65	14.0893	899.949	121.155
3559.96	6.09938	36926.3	651.928	162110	238543	2814.8	88074.8	478.082	46.9117	2872.88	23.4319	975.122	135.417
3562.35	5.41724	32490.8	739.652	147971	254044	2634.82	87831.8	412.711	43.1915	2917.91	24.6276	978.716	129.725
3564.73	4.12716	33147.9	754.533	150941	251137	2655.99	87913.2	344.991	45.1735	2677.52	21.9303	973.193	120.595
3567.11	4.19434	31537.4	560.278	140469	264684	2683.82	83014.4	460.947	41.6479	2646.03	20.2444	947.428	122.983
3569.5	5.75082	32671	666.903	144471	252009	2536.07	95872.5	401.687	43.2268	2762.23	21.4956	943.772	110.036
3571.88	4.37307	32868.4	636.346	150078	247040	2700.92	95297.3	486.806	39.1767	2947.86	22.023	974.298	125.967
3574.26	5.39491	36490.9	625.277	150318	249082	2732.9	88368.4	401.207	47.2171	3031.65	19.1132	965.13	132.267
3576.64	6.72289	34019.8	648.207	139065	258779	2528.05	91678.1	356.253	47.7482	2592.4	24.3815	1003.3	139.923
3579.03	5.11218	31940.4	585.05	131888	272141	2470.1	82755.3	407.846	41.3817	2888.48	28.3199	978.672	146.351
3581.41	5.97668	31260.1	557.952	144126	256031	2641.95	91529.7	371.109	38.0791	2841.49	22.3285	957.35	123.43
3583.79	2.35828	32331.4	573.517	147756	257631	2565	83534.7	331.24	39.9551	2566.25	18.9391	942.764	103.038
3586.18	5.17824	34419.3	678.926	148093	253157	2495.94	87515.8	394.674	38.0198	2760.79	18.8176	1018.67	109.099
3588.56	6.30997	34371.7	626.228	151928	250470	2545.32	86864.6	344.919	37.8034	2569.33	25.0714	867.747	113.205
3590.94	4.96682	33364.4	573.24	145768	252750	2545.36	92358.8	382.019	42.2025	2817.92	20.386	961.154	140.03
3593.32	5.78254	30308.3	600.653	153079	251987	2657.26	86415.9	379.258	48.9047	2881.21	19.7803	954.084	135.751
3595.71	2.46684	31858.1	592.01	143369	264857	2390.97	78732.5	404.15	39.4291	2803.22	21.9007	894.475	96.8339
3598.09	3.76851	33388.9	586.603	140108	259893	2491.44	88972.8	394.08	53.2655	2909.37	16.8782	972.723	142.181
3600.47	4.4752	32089.3	616.901	148144	248800	2484.14	96474	429.712	42.612	2726.15	22.3653	934.694	130.749
3602.86	3.77764	31337.6	613.457	145438	260021	2242.97	84122.2	366.466	37.6397	2588.34	17.4695	927.751	136.587
3605.24	5.28017	32782.2	638.612	150180	249813	2466.6	90749.6	487.321	48.7245	3395.84	17.5743	1003.85	136.073
3607.62	4.37659	31534.9	595.635	143265	261420	2310.25	84584.7	373.857	40.0733	2724.83	19.2845	923.372	99.6577
3610	3.67113	30228.4	524.215	131383	276731	2458.5	78693.9	393.066	33.2884	2481.54	21.6093	859.905	100.792
3612.39	3.93207	29759	490.22	142489	261975	2523.4	86574.2	442.557	39.6111	2508.36	17.6565	877.555	124
3614.77	3.38277	33495.5	599.283	148956	253903	2420.04	86141.9	394.611	38.8791	2957.71	23.7154	925.954	126.235
3617.15	3.76318	36485.1	508.618	154895	243207	3009.2	90925.7	470.063	54.0518	3075.31	22.7308	1005.52	114.048
3619.54	4.99322	31857	677.297	144108	251724	2609.77	97409.5	420.385	38.928	2798.26	23.7674	986.425	120.114
3621.92	6.21486	32398.9	492.527	143808	258900	2402.37	86749.5	386.883	43.777	2883.92	20.2684	900.235	120.364
3624.3	5.16439	34671.2	645.897	152642	242860	2740.22	95888.7	400.868	53.7491	3577.32	20.6145	1046.74	130.861
3626.68	7.20965	33188.9	664.702	161025	242272	2537.88	87891.4	326.679	40.3841	2748.39	23.465	1044.82	148.494
3629.07	4.49716	31474.4	543.418	145830	255793	2407.76	89527.1	374.898	41.4714	2926.62	18.2157	959.084	119.75
3631.45	6.83605	36482.5	623.7	157666	244064	2739.75	86576	452.574	48.8496	2467.99	24.4944	954.111	133.857
3633.83	6.01709	33749.9	668.18	140083	261016	2485.07	87231.7	345.528	42.2059	2620.75	20.7295	916.278	131.807
3636.22	5.03329	36065	619.294	141218	256524	2225.33	90467.5	335.351	49.1221	2859.96	19.8134	865.202	111.069
3638.6	5.41645	35561.7	701.512	152339	240609	3035.51	98546.1	439.624	48.5107	3525.68	23.0052	1050.4	150.078
3640.98	3.70587	35172.6	556.593	150997	247989	2541.51	90939.7	470.467	52.2672	2641.69	26.3114	942.19	113.38
3643.36	4.29107	34445.5	652.454	144094	251013	2647.51	95633	372.968	42.4128	3289.74	19.5843	966.058	130.401
3645.75	4.55708	32172.9	572.312	149280	247161	2493.25	97256.2	322.303	47.6069	3038.63	22.2205	911.675	143.72
3648.13	3.91873	35785	580.31	151924	250611	2500.58	84978.2	372.657	47.646	2890.95	15.2434	958.238	121.442
3650.51	3.26861	34057.7	574.589	153632	247123	2389.53	89770.9	397.973	41.5457	2868.12	22.8957	938.504	128.932
3652.9	6.08281	32633.7	678.453	148230	255679	2531.85	85260.8	413.817	50.8612	2723.12	16.866	908.093	106.542
3655.28	4.46868	31162.6	673.836	135787	264857	2526.56	89444.8	363.266	36.7537	2816.37	20.204	903.307	111.093
3657.66	4.53346	30172.8	524.267	142286	266725	2487.64	79382.2	376.737	47.2604	2407.3	20.023	845.005	104.589
3660.04	4.15395	35045.8	656.79	152014	249832	2584.25	86843	401.086	42.9839	2560.35	27.1612	960.224	140.371
3662.43	3.37825	33919.1	445.295	145002	253042	2369.01	92485.3	388.865	47.7383	3129.39	21.4033	910.758	108.455
3664.81	5.78161	31142.4	657.272	160919	243082	2606.64	88191.7	426.425	51.6164	3141.02	15.1464	1109.79	136.15
3667.19	3.97388	34484.7	692.833	147792	251636	2586.65	89877.1	422.578	41.8991	2963.26	21.0763	998.317	117.529
3669.58	3.37707	31459	652.901	170022	234586	2851.22	89074	388.63	45.9012	2574.58	25.6911	969.591	122.778
3671.96	5.82833	35894.1	641.071	153000	243006	2713.52	95146.8	367.453	49.0721	2567.63	22.1929	891.624	113.392
3674.34	3.60707	31556.8	527.613	144787	259669	2377.34	85180.9	342.21	36.626	2809.24	18.8785	889.664	126.477
3676.72	4.99599	35615.5	551.631	150116	248957	2645.86	90203.9	412.094	45.0363	2560.73	19.1038	1024.85	137.385
3679.11	6.75755	38642.9	768.233	160081	233184	2674.38	97597.4	390.491	49.2277	2735.73	18.3144	938.978	139.658
3681.49	2.39965	29864.7	597.29	150454	254244	2224.71	87540.1	389.978	30.6071	2776.4	16.4975	835.602	112.512
3683.87	2.89965	33875	591.642	145125	253635	2463.8	91231.4	396.731	49.5308	3016.66	20.3357	975.459	119.043
3686.26	6.15915	32125.4	611.222	147503	251065	2529.56	93845.2	388.236	47.915	2725.68	21.7652	941.142	132.598
3688.64	6.97714	31363	531.178	152040	253188	2323.36	85397.2	353.496	44.0783	2888.99	19.8497	917.581	131.441
3691.02	3.66109	30016.7	707.57	145092	257322	2507.66	89177.6	453.277	44.6804	2976.49	25.5117	919.725	141.14
3693.4	5.98689	31124.4	576.791	150580	248998	2659.89	94065.6	326.872	42.5616	2457.59	17.9402	973.451	107.083
3695.79	3.86683	31898.5	597.435	154894	248761	2313.08	88052.1	387.338	50.3803	2492.04	19.2176	945.94	98.994
3698.17	4.1211	33093.4	537.603	160849	240291	2576.43	92042.2	400.271	44.3967	2092.68	22.5342	875.303	130.28
3700.55	5.28938	29479.9	576.421	144940	253060	2523.31	96769.1	502.763	47.516	2639.37	25.4559	983.749	118.404
3702.94	4.28982	32174.8	524.854	136917	265601	2333.04	86516.3	346.099	40.0734	2404.78	16.8253	942.927	109.636
3705.32	3.04591	27931.5	501.023	148850	263677	2020.81	77909.6	321.189	44.2638	2372.14	16.7195	807.685	100.281
3707.7	3.97059	33089.4	615.537	158115	245921	2406.95	86895.9	403.852	45.6439	2413.9	22.736	872.02	118.324
3710.08	4.2799	35379	679.042	160441	242070	2666.09	86876.6	415.59	56.5296	2611.39	24.326	919.363	135.879
3712.47	5.24117	39019.2	667.12	150160	240193	2937	99557.7	443.374	35.1918	2944.18	19.8495	943.657	146.819
3714.85	4.39673	33715	583.206	144629	257277	2731.2	86510.7	389.376	41.0674	2777.73	19.7614	954.318	127.887
3717.23	3.27965	33239.5	616.084	157069	246262	2355.05	87436.4	427.015	49.8033	2590.81	22.1134	929.707	128.065
3719.62	6.3134	33014.3	652.628	153268	255077	2344.76	79173.7	383.836	46.4576	2847.29	15.6585	843.976	118.291
3722	5.23144	31404.4	532.263	149121	255397	2398.27	85886.7	366.452	49.5459	2876.06	21.9305	905.214	96.1438
3724.38	3.63009	30098	552.403	150929	254568	2448.18	85957	382.313	43.7212	2708.58	19.9525	981.025	129.385
3726.76	5.89632	36204.5	620.302	143324	258527	2523.04	83882.3	431.843	55.8865	2949.58	17.0141	942.029	134.418
3729.15	5.76722	30285.8	616.906	143175	259090	2486.68	89031.9	385.291	43.658	2985.09	17.702	923.531	106.202
3731.53	4.58277	31012.7	685.08	155495	244805	2725.05	93453.7	421.809	50.6622	2694.38	21.7581	925.594	119.954
3733.91	5.6174	34154.4	622.994	152182	250371	2409.34	86466.2	417.78	50.6208	2891.44	21.9041	1020.37	134.492
3736.3	4.58836	32607.2	604.065	148853	251656	2294.08	90820	369.929	40.0563	2824.05	22.0731	947.141	111.396
3738.68	3.70751	33971.4	631.075	140134	257830	2351.2	91701.2	444.232	44.8757	2667.07	18.437	1065.16	126.394
3741.06	6.09292	37000.8	613.825	160345	232628	2796.66	99290.9	430.079	37.6779	3084.8	22.3135	1061.49	133.101
3743.44	5.91702	32555.8	634.874	150641	252702	2761.18	86300.6	389.291	42.3793	2879.07	25.2975	972.173	129.313
3745.83	5.43964	28719.2	514.027	143589	262891	2393.8	84919.2	368.728	40.7295	2448.69	17.2171	875.425	120.96
3748.21	7.58144	33799.5	668.224	156751	241412	2388.99	94805.3	412.13	33.973	2409.17	18.1482	968.209	140.065
3750.59	6.33946	30359.7	622.941	144053	253893	2459.12	96113.6	340.125	53.8452	2633.38	29.6405	899.351	106.826
3752.98	8.28757	36807	662.519	152689	247451	2661.35	87337.7	382.734	50.0695	2984.36	21.9871	1053.12	151.27
3755.36	4.33008	33284.6	616.613	149227	249340	2391.14	93108.7	383.193	52.1859	2815.54	21.9283	898.906	132.957
3757.74	3.13619	30646.4	709.242	152888	247574	2540.08	92809.1	419.353	46.0896	3106.11	21.839	973.406	124.467
3760.12	5.61052	33027.3	697.861	153600	251817	2494.73	83721	434.457	49.7184	2384.5	24.6586	1005.55	134.465
3762.5	5.30889	33456.8	589.789	151662	245257	2467.2	95645.2	459.4	45.859	2930.61	18.5237	942.891	122.684
3764.89	2.72207	31693.6	652.402	152286	253460	2361.45	84503.5	380.324	45.9363	2519.3	20.021	908.506	93.2072
3767.27	4.63505	34201.7	599.047	145151	255855	2583.96	87013.7	422.246	44.7559	3424.12	27.2986	906.245	131.757
3769.66	6.2833	32664.1	556.647	154842	249813	2514.93	85333.3	399.08	49.7862	2805.03	21.3565	929.559	129.155
3772.04	4.25788	30713.1	566.231	153938	252010	2457.34	85301.4	330.001	34.5737	2680.93	23.4491	974.963	110.823
3774.42	2.74493	34109.2	612.845	154285	244706	2383.82	92345.4	381.419	41.1002	3050.33	23.0846	963.803	105.466
3776.8	4.90802	37192.9	537.036	151497	245165	2560.47	93114.8	407.202	43.7226	2278.84	17.587	869.768	128.211
3779.18	3.60759	30585.1	565.845	147600	254927	2323.94	89217.7	417.156	44.9149	3018.41	21.8792	954.516	131.117

## Sheet: Li8
Sample	T [°C]	t [s]	p [bar]
Li8	650	599337	2000
Linescan															Lines parallel to interface					Isotope profile
Distance [µm]	Li7_ppm	Na23_ppm	Mg25_ppm	Al27_ppm	Si29_ppm	K39_ppm	Ca43_ppm	Ti49_ppm	Mn55_ppm	Fe57_ppm	Cu63_ppm	Sr88_ppm	Ba137_ppm		Distance [µm]	ΔDistance [µm]	Li7_ppm	2SE		Distance [µm]	ΔDistance [µm]	δ7LiIRMM-16	2s
0	3.43899	28863.9	661.273	148287	253835	2351.16	91594.9	440.271	45.6446	2830.52	20.0112	985.546	140.516		Crystal					Crystal
2.37999	1.67614	27664.6	524.624	154458	248837	2484.35	92414.4	393.239	39.6094	2620.06	19.6938	919.865	145.347		20.687	12	7.5582	0.597301		79.621	12	-9.23738	2.83216
4.764	3.67329	33051.6	737.341	155883	244528	2425.93	91143.6	430.852	46.9994	3095.5	14.4615	990.087	140.861		55.863	12	6.84062	0.522247		121.293	12	-12.4729	2.93053
7.148	3.36174	28585.8	578.358	140929	261907	2249.7	90024.1	410.174	34.7494	2360.55	22.0995	1101.92	136.103		90.955	12	6.02964	0.510575		159.895	12	-18.2875	3.02677
9.532	4.79921	30368.7	588.074	161700	243669	2524.81	87757.1	397.138	35.5384	2644.94	14.6385	980.984	133.326		124.204	12	5.21399	0.524446		200.156	12	-23.2359	3.2399
11.912	6.29995	36223.5	726.243	164451	233833	2765.8	92797.6	416.039	45.7004	2850.22	17.6796	1012.78	156.039		159.255	12	5.19481	0.569391		242.423	12	-20.8955	4.66858
14.296	3.93064	32442.4	580.666	148957	255165	2292.51	85386.8	370.137	51.6059	2934.71	17.8273	935.99	130.839		192.085	12	4.21669	0.580283		280.932	12	-21.6314	3.79446
16.68	4.86307	30796.5	629.21	159997	242070	2413.99	91923.3	450.662	52.4011	2778.11	17.1401	990.996	133.527		226.089	12	3.68993	0.502975		319.21	12	-11.8503	3.19858
19.06	2.09452	31300.9	590.273	155903	244082	2487.25	93812.8	451.273	37.0047	2932.07	17.3742	933.064	113.1		260.26	12	3.06895	0.53976		360.744	12	-7.73271	3.78835
21.444	-1.33548	33183	697.576	167832	234200	2686.08	90376.5	516.209	51.569	3097.47	22.0712	1042.02	102.781		295.436	12	3.22045	0.47963		401.105	12	-4.44374	3.31782
23.828	3.23714	31529.1	659.934	147568	249085	2581.94	97311.5	430.659	42.8598	2546.07	19.2929	1030.72	128.699		329.606	12	2.36549	0.474506		502.748	12	6.9213	3.72407
26.212	4.86007	32695.4	515.584	145303	251345	2316.95	96398.1	404.157	53.118	2389.36	16.8072	988.96	118.775		363.777	12	2.04169	0.452332		603.735	12	6.26967	3.55227
28.592	4.9249	37062.6	586.029	160976	239364	2461.9	88919.3	336.759	41.9503	2700.08	15.7151	1013.4	122.069		399.623	12	2.37564	0.499167		802.15	12	7.95201	3.24838
30.976	2.80915	30874.7	661.043	153309	240809	2553.29	102591	485.762	41.3595	2828.73	21.0556	951.501	150.312		434.129	12	2.66252	0.465756		1104.23	12	5.8579	3.08825
33.36	4.34665	29268.7	485.247	150839	256127	2376.57	84437	460.593	30.7682	2778.31	24.1497	1048.99	119.396		469.556	12	2.4442	0.561553
35.74	3.16944	38266.5	706.898	161954	235773	2513.75	91592.4	380.747	48.5233	2789.61	19.5739	1030.07	114.912		504.04	12	2.58217	0.452401
38.124	3.88258	29826.3	621.807	161424	244008	2229.27	88310	438.728	37.6976	2706.34	22.3425	912.18	111.36		540.572	12	2.3802	0.482478
40.508	2.62788	30286.5	585.006	150056	255070	2266.23	86256.2	357.475	40.5541	2804.01	16.79	982.504	126.007		574.916	12	2.40861	0.50164
42.892	3.18896	32343.3	662.36	143535	248930	2325.94	102734	370.717	48.5147	2331.52	23.5847	983.835	118.316		Glass
45.272	4.39629	29646.1	540.155	158055	243521	2280.42	93801.2	435.702	42.0894	2661.27	25.2463	981.298	120.597		-11.255	12	100.611	1.57337
47.656	2.32	34313.4	693.59	153443	239691	2422.54	100960	410.703	48.6714	2818.47	19.7865	981.267	136.545		-44.417	12	104.286	1.67815
50.04	3.28964	32464.1	622.506	149348	257758	2519.19	80526	439.788	42.7116	2884.63	16.3865	1023.57	136		-78.545	12	105.14	1.87828
52.42	3.56524	33431.5	634.85	162086	236477	2747.77	94483.8	618.041	46.4271	2952.73	21.2209	972.362	130.054		-115.182	12	102.564	1.56107
54.804	3.30603	35349.8	467.995	151287	249897	2432.74	87361.2	426.486	38.1526	2985.59	17.0955	987.053	136.065		-148.808	12	104.184	2.01719
57.188	2.41775	31493.6	583.167	146912	246436	2226.93	102967	354.778	56.5037	2424.52	20.2362	938.349	103.135		-180.427	12	104.904	2.05106
59.568	3.0235	31670.5	644.303	158181	248071	2540.73	84034.3	431.847	44.1423	2985.51	26.6213	1023.21	137.25		-216.06	12	105.484	1.74545
61.952	4.02152	33421.6	641.461	160939	240316	2261.77	90972.7	417.369	40.2312	2741.65	20.6438	1025.18	136.339		-250.69	12	103.206	1.67368
64.336	4.1261	30952.6	669.822	154485	243441	2276.77	97040.1	394.935	50.5457	3024.04	25.4682	979.338	127.752		-285.487	12	105.082	1.85483
66.72	4.81992	31992.3	622.633	155697	242700	2504.41	95830.2	371.994	43.442	2611.46	18.1819	964.096	121.511		-320.954	12	106.211	1.89671
69.1	2.87086	31739.2	588.965	153098	238683	2446.02	105734	402.534	44.7368	2714.89	20.8318	913.626	111.244		-355.751	12	105.35	2.05272
71.484	3.41622	32253.1	632.644	160957	237048	2314.73	97242.6	470.903	51.1734	2464.44	17.029	1015.67	117.438		-390.381	12	104.079	1.86698
73.868	1.73128	33019.7	560.773	155602	249113	2536.31	85109.1	511.282	38.0134	2484.51	20.9729	1039.26	113.912		-424.509	12	104.875	1.87717
76.248	5.66165	35926.6	592.329	160957	239161	2422.97	89536.7	452.731	48.7909	3389.88	22.8071	1054.95	146.054		-460.644	12	106.495	2.05021
78.632	2.49899	32731	703.79	148125	250385	2408.69	93341.7	431.296	42.0794	2841.8	18.0044	908.531	130.827		-493.768	12	107.216	2.03841
81.016	3.55102	35969.2	548.109	164363	232594	2604.77	95386.1	500.059	38.3395	2821.91	20.9579	983.806	129.059		-527.562	12	101.539	1.75244
83.4	5.42124	32897.8	730.001	153373	244853	2622.73	94072.8	412.817	48.0524	3078.26	15.8766	987.141	124.54		-561.828	12	103.07	1.89004
85.78	3.95392	30195.2	684.125	160453	237837	2440.9	97876.5	454.597	52.3688	3222.38	21.4464	972.574	127
88.164	1.2735	33452.7	610.822	156401	240398	2312.87	96532.5	436.546	38.0143	3184.16	19.1128	994.386	144.495
90.548	5.87195	32741.5	689.835	153062	240026	2484.55	102395	382.48	58.3542	2827.19	24.7085	1031.19	132.84
92.928	3.21884	31380.1	588.49	144876	256482	2440.67	89695.5	416.606	52.0327	2938.17	13.8339	965.606	127.044
95.312	5.41868	30795.1	737.249	150857	254373	2529.71	85632.3	373.672	50.1949	2483.29	27.3105	929.674	137.19
97.696	3.34058	31071	628.87	147699	256059	2318.65	86974.8	436.25	38.811	2819.22	19.1976	977.043	118.243
100.08	6.70657	34684.8	629.716	158178	241813	2352.83	90678.2	435.789	55.4685	3211.06	24.4804	998.264	134.934
102.46	2.75368	30689.9	630.038	154684	245087	2229.14	95109.1	398.653	43.0164	2511.86	19.8652	950.406	116.509
104.844	2.23533	33029.5	665.158	148617	252601	2317.99	89098	450.22	31.7119	2880.29	25.2844	868.831	139.749
107.228	2.44385	33557.5	628.595	149109	254750	2512.91	84510.9	478.712	46.6298	2701.14	20.5868	1024.62	130.205
109.608	3.19701	32395.5	565.879	148423	247219	2211.51	98651.9	361.33	40.2273	2654.72	18.891	943.773	144.819
111.992	4.13853	31780.7	614.152	151285	257046	2393.61	79965.8	430.66	48.8105	2790.54	17.3479	884.806	155.748
114.376	2.3862	33333.8	678.003	154802	242658	2442.79	95065.9	475.432	42.7687	3257.39	23.3469	986.366	117.221
116.76	2.41599	33814.6	679.713	171077	230509	2550.66	91301.1	411.005	39.4974	3066.96	20.0397	1045.06	132.807
119.14	3.30249	32157.7	771.081	158755	243384	2306.42	90227.2	429.448	43.7323	2854.3	21.181	923.617	126.668
121.524	1.63751	33125.5	656.345	157980	241258	2711.14	93885.8	334.166	44.2296	2367.91	23.0839	993.68	122.506
123.908	4.32161	33139.6	673.412	152105	247629	2531.25	91712	402.335	45.9793	2876.59	20.4528	921.134	118.875
126.288	1.81412	32820.4	626.49	158596	237216	2377.59	99172.9	377.611	40.5668	3062.92	21.0867	988.195	117.866
128.672	3.5615	36543.5	548.76	150524	246057	2589.82	93113.3	392.017	41.8415	2805.26	20.6212	941.107	144.774
131.056	2.5858	29515.8	630.219	149749	254635	2274.59	88067.5	374.922	36.7442	2745.12	22.25	982.808	102.228
133.44	3.08613	31320.2	676.25	148052	249790	2487.86	95697.2	428.999	38.527	2736.71	21.6693	1011.89	115.011
135.82	4.57349	33754.8	655.766	148266	249364	2357.78	93979.7	450.774	41.6598	2574.92	14.635	988.415	133.547
138.204	3.03234	32401	624.324	157414	238392	2558.46	99490.1	403.322	39.8427	2667.46	18.4887	1049.25	136.019
140.588	5.06226	31229.5	667.7	157567	241902	2605.43	94931.8	417.137	48.8881	2756.37	17.8311	949.147	133.295
142.968	4.99521	35712.9	581.876	162219	233549	2560.4	97203.3	412.096	46.6476	2818.17	20.6728	947.317	120.49
145.352	4.91737	29991.9	599.252	145050	260586	2313.02	85074.9	342.008	47.1343	2525.06	20.1668	979.319	124.279
147.736	4.3033	32764.6	645.411	155759	242284	2416.91	94950.1	398.704	47.6131	3329.4	25.7295	997.659	130.137
150.116	4.74024	33401.6	507.433	148183	251355	2314.24	91525.5	438.765	35.9811	2638.42	19.6207	1032.3	127.449
152.5	2.20167	35365.3	682.616	156944	238402	2670.02	96934.5	455.967	39.3895	2827.5	15.7721	990.637	133.758
154.884	1.90042	33821.9	584.784	162267	242845	2471.7	85009.5	407.043	47.2136	2623.89	22.0606	941.207	124.601
157.268	5.00323	32343.8	602.826	160002	241149	2549.54	91353.8	467.631	49.4429	3139.76	21.814	1051.05	119.877
159.648	3.78109	33631.1	644.71	156951	240364	2208.3	96343.8	387.846	47.4429	2647.1	17.8874	928.513	111.472
162.032	3.34794	32616	655.793	151454	249823	3045.68	89618.2	386.32	38.1199	2570.82	24.3662	919.567	128.012
164.416	4.65916	29741.9	580.302	164551	237844	2376.95	93528.2	480.509	38.7547	2594.47	19.9174	947.668	124.684
166.796	3.64853	33548	514.945	144080	258175	2414.78	86540	398.615	48.3968	2590.91	17.5605	963.498	132.413
169.18	4.00717	32424.1	570.899	160212	241650	2406.09	91030.8	402.505	48.9439	2524.06	24.8175	1015.48	157.47
171.564	4.39771	31427.1	622.233	156917	249064	2323.45	85120	381.206	60.7397	2662.68	18.7031	919.224	119.697
173.948	2.67495	30717.9	593.892	150492	249773	2382.4	93368.8	346.886	41.2606	2761.19	22.1408	890.772	119.987
176.328	2.02362	36212.6	606.7	151796	246269	2665.01	90761.6	473.92	34.7224	3227.88	16.9701	983.038	126.148
178.712	2.85631	31746.3	678.598	142691	260572	2428.85	86347.5	385.107	37.6197	2659.27	18.678	860.678	111.319
181.096	3.30214	30717.2	535.56	154437	253542	2426.35	82295	358.99	42.971	2746.52	20.9175	908.68	119.272
183.476	0.968412	32629.9	578.398	147756	256503	2386.51	85088.4	379.818	41.2202	2514.42	16.7595	953.157	121.575
185.86	1.20373	31876.4	672.551	144219	253362	2420.68	95320.1	443.499	37.3311	2361.59	13.6908	942.63	134.929
188.244	5.76943	33091.5	724.505	164023	239097	2587.51	88710.3	429.549	46.5992	2616.66	20.3092	1028.76	121.429
190.628	2.40013	33138.5	635.767	159770	234528	2567.85	100931	460.512	46.4742	3244.73	17.2354	987.781	140.388
193.008	3.54043	35138.6	650.578	155843	243266	2654.75	91044.3	381.296	42.105	3066.12	18.4919	1063.65	145.574
195.392	3.51218	30558.1	713.769	150558	252974	2519.7	88539.1	360.596	41.7555	2378.81	23.2587	954.868	143.411
197.776	3.80084	30503.5	592.556	147317	256656	2297.46	87318.7	419.558	54.0836	2696.96	13.5458	956.106	128.302
200.156	3.17289	31210.4	670.764	158200	246764	2462.46	87109.6	377.007	47.2731	2454.49	20.0841	952.112	128.725
202.54	3.71373	31920.7	600.004	151927	252552	2178.49	86383	397.304	36.9836	2532.21	22.6263	841.021	123.287
204.924	3.52184	31590.7	559.408	149905	250136	2460.86	92222.2	416.697	55.3819	3132.17	23.3343	964.406	138.371
207.308	5.15065	35174.4	666.016	166481	231173	2468.02	95331.5	437.066	47.4024	3000.36	23.1476	1006.34	116.081
209.688	1.0362	32252.1	646.836	159226	247996	2587.6	82516.2	468.949	45.8406	2544.46	18.3438	1015.94	129.215
212.072	4.70298	31671.4	700.69	146361	253674	2443.4	91719.8	358.793	41.0903	2813.29	20.6826	1010.3	120.044
214.456	5.46552	33600	693.79	156163	242643	2578.76	92814.8	431.2	39.5125	3354.43	19.2837	960.946	155.122
216.836	2.27222	33204.2	613.007	140616	259329	2697.16	89023.4	446.32	56.8373	2961.73	19.3609	945.026	147.652
219.22	4.41101	36534.8	597.851	151313	240308	2533.95	100488	458.581	42.7574	3038.09	19.4863	995.343	155.284
221.604	3.39565	30855	673.365	155820	248493	2304.61	88035.1	393.125	35.7679	2597.74	17.4142	927.876	131.339
223.988	2.92923	35667.1	586.188	159814	236603	2553.22	95264	514.763	46.769	3192.08	19.2594	1067.27	118.705
226.368	4.9337	31111.2	635.603	153920	247891	2302.2	91075.2	379.708	49.2252	2821.24	19.8005	989.821	115.254
228.752	4.08449	34628.8	570.284	147547	251741	2499.01	90176.4	439.888	35.5997	2939.39	18.6583	945.673	125.738
231.136	3.47471	34335.4	668.479	149056	248872	2588.01	92769.2	490.23	53.1746	2659.43	17.4747	984.398	122.162
233.516	5.41321	32127.1	731.712	151555	245784	2589.3	96020.6	365.019	47.0882	2923.22	21.2018	1032.34	137.198
235.9	3.91377	34794	559.002	141282	252676	2490.48	96841.2	421.623	42.6243	3207.26	19.5468	947.32	119.15
238.284	4.20296	33650.6	670.994	150252	242226	2370.95	101803	415.416	42.1185	3161.53	28.0787	960.224	127.092
240.664	5.61078	28713	532.841	149251	254035	2443.97	90510.9	411.426	49.063	2607.68	22.5201	906.803	130.245
243.048	4.44476	34393.7	593.884	151957	244542	2388.53	95750.4	389.892	57.5108	2670.92	21.4377	1005.01	132.876
245.432	1.96532	26655.8	524.843	134527	274399	2250.33	81526	359.837	38.7042	2613.48	15.0336	876.489	118.995
247.816	3.94594	31023	558.892	157548	245656	2376.27	89712.8	413.299	39.3769	2780.12	22.066	972.61	131.247
250.196	4.90567	34832.3	673.011	145003	248900	2577.68	97385.2	389.462	50.1558	3112.09	20.2195	1010.29	146.65
252.58	3.88104	32374.8	618.568	153078	248245	2500.18	90355.1	368.871	45.4866	2788	19.7253	968.282	133.872
254.964	5.22027	31393.9	510.247	149553	254458	2517.97	86537.4	509.627	46.4426	2837.98	21.9324	879.415	125.273
257.344	1.72827	31076.1	620.22	162158	238818	2498.18	93911.3	368.284	43.0288	2655.37	23.1257	945.141	124.577
259.728	6.34918	34399.8	645.177	156339	240906	2464.17	94692.5	387.47	42.836	3301.79	25.9813	995.08	139.902
262.112	6.26835	31717.5	633.284	155352	244938	2423.06	92622.8	366.519	42.5612	3198.81	21.4593	983.955	145.525
264.496	4.83158	33688.8	664.349	155317	246003	2552.78	89107.6	404.758	45.3206	3042.33	16.8109	967.724	148.477
266.876	2.98741	29551.5	620.766	135011	267404	2300.3	88655.6	350.918	36.6966	2568.29	19.2817	899.634	113.938
269.26	2.7308	32995.9	647.019	165506	234937	2678.94	92601.4	422.674	55.7414	3242.41	24.8238	1030.43	116.59
271.644	3.12589	36025.1	683.49	155246	241331	2375.54	94643.1	382.4	49.8289	2636.36	22.5552	958.515	127.991
274.024	1.9858	29767.9	549.388	154645	251019	2336.74	86816.6	382.901	40.2372	2684.58	21.9528	974.952	127.412
276.408	5.30727	36547.5	624.175	164658	229088	2596.36	99628.4	407.282	51.299	2979.99	21.4973	1024.13	124.121
278.792	5.97214	28198.6	591.741	156010	247915	2176.34	90983	399.766	41.4843	2923.67	17.8858	1082.07	130.128
281.176	3.57271	33235.9	618.81	152498	249189	2400.87	88959.4	395.697	47.0125	2757.63	17.588	957.577	130.297
283.556	1.99423	35325.7	624.816	155998	242813	2310.34	92153.2	438.278	50.6126	2608.08	17.5011	943.296	109.937
285.94	3.93272	31188.7	643.897	146437	255986	2259.52	89086.2	323.133	42.2364	2605.34	15.6633	921.296	121.529
288.324	2.65225	33649.9	679.594	152689	244198	2383.33	96161	308.649	47.4709	2570.17	20.8441	940.291	136.19
290.704	2.01482	30874.3	643.872	155274	248302	2608.31	88576.9	400.739	56.0279	2780.18	23.947	974.526	137.58
293.088	4.86094	29128.1	629.8	150545	250590	2593.74	92970.5	349.872	37.3653	3025.17	20.0573	1034.35	145.526
295.472	3.93362	33000.7	691.079	151968	244498	2268.57	97058.7	430.551	50.3654	2841.13	14.8731	885.515	110.711
297.856	2.8433	32644.1	591.58	152366	247886	2325.48	92063.6	354.672	39.679	2499.31	18.0677	1011.92	107.355
300.236	4.88654	32999	591.599	137777	266066	2307.98	83014.8	429.338	47.809	3064.91	15.6998	999.477	131.928
302.62	5.40965	36857	654.523	145595	250311	2391.59	92620.7	372.938	41.1458	3199.69	19.0578	1025.12	114.789
305.004	3.11804	34400.9	683.003	167429	228774	2645.53	98670.6	420.642	47.3012	2626.32	18.8175	977.953	137.629
307.384	4.27909	29491.9	528.688	157114	247928	2445.15	88370	412.102	44.7815	2721.49	15.9581	933.985	125.631
309.768	3.6278	32967.5	641.384	150805	246915	2359.21	94802.5	357.997	28.3263	2991.43	18.8597	991.375	137.871
312.152	3.62076	34660.2	650.069	153695	241969	2635.94	96460.9	423.027	52.915	2981.19	25.4741	1005.12	154.352
314.532	5.01539	31700.4	668.2	154386	246335	2444.69	92150.1	420.797	47.5129	2704.91	24.2292	980.576	127.25
316.916	3.8401	33417.3	669.785	163485	237931	2455.11	90671.7	487.468	42.718	3111.71	15.9569	896.998	135.514
319.3	5.25267	31551.9	623.889	143498	261406	2303.97	84376.1	377.287	34.8608	2585.26	17.4829	896.831	128.438
321.684	3.78509	33420.8	696.353	143563	261111	2567.54	82469.8	374.554	33.4968	2770.96	22.8356	869.073	140.247
324.064	3.34297	37644.1	555.303	141918	253561	2489.81	92295.7	367.091	41.3814	2756.82	27.3987	1023.21	122.967
326.448	3.94489	33465.1	724.331	156340	239270	2464.66	98205.9	427.581	44.9538	2985.2	29.4065	1045.64	129.517
328.832	3.54353	34663.6	586.383	152082	248728	2442.15	88788.2	448.123	58.556	2787.5	13.4405	925.816	124.697
331.212	2.18	33952.5	559.302	143257	251811	2408.7	96790.7	394.565	50.5699	2782.01	18.3866	962.704	110.771
333.596	3.97549	32419.1	555.101	146806	252969	2339.98	91669.5	379.054	52.1574	2864.87	22.9766	972.303	143.185
335.98	3.22103	37756.9	725.209	166724	229584	2206.01	95235.2	358.562	59.2224	2950.98	18.2324	1015.49	107.772
338.364	5.39262	35028.9	721.152	163367	233616	2423.4	95555.3	429.525	54.413	3281.92	21.178	1110.58	137.146
340.744	3.16778	31301	634.376	159443	245451	2479.46	86968.1	412.457	44.1824	2932.45	16.9678	867.595	137.169
343.128	3.39623	38583.1	663.774	163780	234638	2424.17	90320.7	404.288	48.6037	3187.9	25.5476	976.721	127.612
345.512	2.2944	29581.5	683.292	153017	248493	2337.14	93120.3	429.414	49.1048	2451.9	20.536	902.767	113.218
347.892	2.05	33902.8	540.511	154606	246874	2562.59	88860.6	452.743	39.8801	2763.72	21.1012	990.964	140.613
350.276	1.22549	33076.2	651.597	149747	251005	2365.4	90032	436.818	51.248	2690.5	23.7668	977.37	133.342
352.66	5.63682	31915.6	638.736	138289	261023	2370.85	91193.3	347.181	48.1653	2821.6	16.8225	1105.46	134.614
355.044	1.57857	31706.8	594.176	148738	254959	2383.81	86496.3	459.725	48.8356	2858.24	23.0585	1055.61	105.387
357.424	4.05483	30416.9	645.697	153465	246133	2231.45	95326.3	386.161	44.9552	2625.6	17.3338	937.504	107.636
359.808	7.25821	33312.8	681.183	151285	248448	2900.19	91180.9	439.66	57.398	2573.26	25.1019	1014.44	153.475
362.192	4.32899	30608.7	566.719	147736	258800	2435.28	82839.2	511.712	38.2861	2821.82	19.2864	1212.44	143.796
364.572	3.12997	30459.6	594.412	163237	245107	2273.86	83905.7	367.077	48.4103	2439.73	24.7438	869.456	131.101
366.956	4.63468	32048.5	585.061	146268	253164	2650.03	91683.4	506.752	48.885	3130.97	24.7109	1068.72	133.719
369.34	5.28383	36268.2	597.932	146000	245016	2512.84	100848	423.681	44.8255	3006.38	22.4778	968.662	128.173
371.724	4.58852	31992.8	601.011	148543	255241	2601.13	86017.1	404.929	40.3342	2795.99	20.5913	1005.02	120.441
374.104	5.47731	34249.4	585.722	153026	243899	2634.12	95017.4	368.898	42.6225	2928.8	16.6365	1013.02	141.184
376.488	2.71599	30562.4	694.868	158580	247747	2605.74	85195.3	410.303	44.3755	2834.08	21.7587	944.178	116.703
378.872	5.74826	28819.7	597.604	154667	248722	2223.66	90950.1	399.336	49.3499	2948.21	22.1466	1002.94	129.183
381.252	1.62328	35828.8	547.625	146605	249132	2681.1	94331.4	392.355	50.5429	2768.96	20.0702	963.782	135.653
383.636	2.04798	30500.1	689.467	151224	244867	2515.8	99561.9	390.985	52.2087	2923.44	20.4607	981.241	138.788
386.02	3.63451	33343.6	636.753	156946	239216	2547.8	97949.6	363.925	46.194	2770.33	24.6041	985.04	128.24
388.404	3.31828	31989.3	615.862	154609	248895	2205.61	87781.8	379.948	46.7804	2915.54	19.8379	989.984	123.148
390.784	2.53318	30892.3	682.042	141992	254980	2766.96	95791.4	426.065	58.1163	3064.67	21.6953	999.934	133.926
393.168	4.26782	33172.2	711.543	152749	242695	2429.41	98058.4	468.833	35.1856	3133.53	23.4656	965.114	109.171
395.552	7.23607	34378	711.953	139340	256393	2284.03	94708.5	380.988	36.4391	2664.92	22.2902	939.809	144.958
397.932	2.87081	33815.5	588.33	161243	238862	2496.53	91904	410.277	53.4357	3199.31	19.0018	945.901	146.283
400.316	0.78685	35842.2	604.735	154177	243921	2481.51	91810.8	431.598	43.4299	3015.7	29.03	1088.14	105.304
402.7	1.56334	31337.2	726.463	154004	242426	2648.43	98838.6	397.178	41.5975	2724.45	16.772	908.824	123.572
405.08	4.62031	30914.7	730.133	152310	250594	2530.68	88824	412.366	40.7955	2979.48	20.6865	974.964	124.9
407.464	3.2813	31953.1	559.844	148287	244738	2478.54	102480	395.153	57.3231	2931.75	18.9638	1004	130.845
409.848	5.48203	32495.8	670.669	150968	253995	2473.08	84355.1	452.2	54.2603	2600.98	18.3368	948.255	113.905
412.232	5.07029	34362.8	696.956	166748	229470	2735.81	97442.3	419.908	53.1623	3635.68	28.8573	1072.81	137.68
414.612	3.48161	32469.7	620.732	139519	258177	2282.1	93561.1	446.722	46.5877	2787.47	22.5949	901.733	100.331
416.996	6.39747	35263.6	581.574	155310	238587	2456.53	98924.8	393.685	44.5558	3194.44	16.6674	1069.76	124.207
419.38	4.39476	32271	579.236	146465	256349	2579.1	87036.3	484.185	48.6175	2589.53	14.5152	955.758	126.009
421.76	3.23591	34472.3	664.073	165520	231277	2783.74	97042.1	481.946	63.1087	2672.17	25.982	1072.43	133.169
424.144	2.42691	35551.1	564.8	148948	243869	2704.86	99085.8	431.712	65.762	2950.12	22.0446	1097.09	149.579
426.528	6.82093	31617.1	548.087	162818	233831	2485.48	100072	397.58	50.6884	2677.76	20.1748	1038.26	127.501
428.912	3.9613	32304.8	618.538	145842	249963	2298.78	97878.9	466.311	40.0475	2561.17	23.6503	928.493	120.181
431.292	1.88986	34596.3	681.03	152090	239626	2630.87	102609	433.565	40.2859	2658.91	14.8577	951.598	134.017
433.676	3.42098	32776.3	680.546	156094	243979	2649.26	92006.3	512.175	53.8953	2771.49	22.2375	1014.5	141.625
436.06	4.73469	34548.8	581.845	159656	237222	2324.12	96008.9	421.074	46.4654	3083.04	25.9663	1063.59	130.75
438.44	1.59761	32480	586.625	144186	254903	2353.47	92583.6	409.67	43.2318	2411.56	21.1885	928.072	130.843
440.824	3.26003	29203.5	685.895	176496	229995	2529.42	89442.1	426.462	54.4028	2840.88	26.1913	983.949	135.009
443.208	3.0241	32600.4	588.893	162136	241563	2468.04	87863.8	453.181	43.6059	2989.25	22.9831	1012.72	131.063
445.592	2.84491	32468.1	730.761	149134	253850	2405.66	86970.3	421.883	40.2433	2773.09	21.2058	911.54	137.121
447.972	3.48984	30745.3	548.443	155608	250233	2556.43	85284.6	393.436	44.8722	3029.18	17.6517	939.01	128.327
450.356	3.29238	30330.1	522.962	155369	246611	2416.74	92220.8	416.491	44.847	2406.64	20.4079	953.342	135.029
452.74	6.73907	33686.2	685.875	144824	252640	2374.57	93636.3	566.358	50.3214	2372.52	23.1104	1019.07	137.658
455.12	6.75522	33274.3	650.577	148601	245054	2441.61	100593	425.459	42.6425	2546.48	22.7771	973.198	108.314
457.504	2.8089	30810.5	731.441	157523	244384	2359.97	91571.5	447.15	44.5113	2817.2	17.9871	1043.46	133.01
459.888	3.06708	34245.7	534.648	146731	247517	2400.14	98205.1	442.366	51.9927	2884.65	23.2374	1009.52	131.676
462.272	4.99971	36614.3	614.999	159438	235735	2512.65	96352.6	432.413	42.0951	3185.27	23.1998	949.014	165.107
464.652	4.03339	34177.1	710.561	148773	252647	2429.4	87574.3	386.557	48.703	2842.04	26.5341	964.741	137.518
467.036	3.72008	32204.8	638.276	160969	236985	2575.89	96670.1	394.186	57.2117	3026.03	17.7557	1056.74	118.497
469.42	4.2926	31439.7	547.103	155556	243058	2387.58	96148.4	404.901	46.45	2663.71	18.6896	914.572	122.63
471.8	2.23665	31394.8	577.328	150537	253572	2515.8	86854.1	459.13	44.4159	2465.39	21.0525	925.583	127.263
474.184	2.27386	32310.4	606.38	144554	255224	2346.13	91595.6	353.281	46.9654	2679.41	23.0055	885.697	128.596
476.568	2.38062	32965.5	587.057	171397	232540	2329.13	89296.7	385.844	55.5565	2729.4	22.4889	946.653	123.401
478.948	3.429	36059	522.542	154497	243908	2743.61	90405.2	469.462	39.8528	3776.11	17.3655	961.376	141.205
481.332	1.83073	30386.5	603.116	144003	257131	2536.76	90988.9	367.31	48.9394	2772.46	20.8488	924.145	120.654
483.716	5.60852	32735	503.911	152750	253085	2620.81	83155.4	377.069	47.6902	2733.37	24.3518	934.697	117.499
486.1	4.78128	34286.6	771.885	149039	253071	2290.42	86437.9	411.288	47.4277	2943.72	16.3602	937.972	111.937
488.48	4.72471	33788.7	709.371	154008	247041	2299.83	89214.6	382.516	55.2094	3120.22	25.1698	1082.86	127.152
490.864	4.90592	39253.3	756.631	141834	246193	2572.48	101917	387.966	47.0471	2676.82	26.9933	947.316	128.01
493.248	2.94212	33173	607.997	148148	246906	2725.43	97717.8	464.963	42.177	2930.33	22.7339	1142.62	135.136
495.628	4.94558	32723.6	674.414	150508	247455	2398.48	94560.7	473.742	47.0688	2817.02	19.8209	984.982	120.46
498.012	4.38639	34082.8	671.385	161213	237997	2609.43	92668.4	429.747	46.2414	3254.94	20.3393	1001.68	179.788
500.396	2.83647	34255.6	634.311	153703	253132	2592.07	79544.8	393.357	44.9838	3339.35	20.8678	1028.64	132.341
502.78	4.34815	31599.5	684.858	159288	239930	2154.09	95426.7	387.069	49.8719	3035.06	23.0642	927.575	135.195
505.16	2.97267	31986.6	675.18	173953	235804	2822.93	80987.2	437.582	44.4908	2917.69	18.4285	1025.2	113.857
507.544	2.41263	35814	644.844	161555	238313	2726.36	90277.6	463.319	54.2837	2948.11	22.1347	999.026	112.137
509.928	1.77519	29589.3	624.656	153660	243856	2941.26	98182.3	480.496	51.5767	3028.86	27.2128	1015.48	122.023
512.308	5.26969	31899.2	547.177	154943	251907	2358.86	83324.7	342.718	52.8942	2362.52	18.9085	968.013	123.35
514.692	2.3262	31400.4	531.53	150196	258962	2549	79013.1	398.915	44.361	2556.78	19.7483	998.972	136.528
517.076	2.58935	35481.2	509.555	165041	229622	2558.89	99013.4	408.487	65.1815	3444.59	24.4824	1064.54	127.033
519.46	2.87148	35644.4	745.763	158313	238451	2360.25	94488.2	514.238	47.5075	3205.7	21.4822	1020.46	120.92
521.84	0.514037	31276.2	508.041	173439	234299	2361.46	85681.7	457.052	47.6394	2571.62	17.1155	876.847	118.007
524.224	4.10795	31707.9	626.258	151770	247968	2329.1	93587.6	379.303	35.3981	2522.4	24.0266	948.03	124.284
526.608	4.86858	38253.9	533.594	161585	233542	2618.05	95211.2	458.809	38.7399	3068.29	19.1838	1077.88	159.7
528.988	1.02522	35447.1	573.59	158933	240767	2530.75	90494.1	475.297	45.3623	3120.79	22.6071	996.549	133.849
531.372	6.10213	33296.7	582.05	155899	237446	2565.8	101954	466.002	63.084	2841.13	18.2782	972.452	153.031
533.756	2.80133	28976.1	698.748	150588	247568	2336.37	98072.9	417.405	41.1477	2766.36	19.3251	944.822	119.419
536.14	4.59833	31648.7	765.727	144209	255023	2443.14	92595.3	405.589	53.985	2749.2	16.1692	909.068	113.341
538.52	3.74175	30957.1	708.957	154721	246287	2388.93	92508.9	394.638	52.7344	2677.01	24.3796	997.122	149.945
540.904	2.17389	29776.5	573.432	153984	249812	2234.76	89766.9	418.356	36.0828	2565.62	18.4852	868.889	129.659
543.288	3.19542	33637.3	634.368	151420	240898	2253.82	102814	380.262	45.9736	2797.98	18.9021	926.911	140.436
545.668	2.18329	32504.8	598.528	153603	249036	2386.63	88275.6	377.571	52.7694	2911.24	18.0127	999.649	139.823
548.052	1.93316	35391.5	861.85	165777	231586	2569.82	94875.4	412.039	53.7057	3226.61	21.8148	1057.24	148.146
550.436	3.97462	38460	687.463	146835	246005	2481.31	96292.3	343.117	43.122	2786.21	20.4083	998.612	131.765
552.82	4.41932	34901.9	654.573	156463	234524	2689.48	103958	388.673	39.3998	2924.13	20.8368	995.68	128.069
555.2	6.60324	36426.6	529.035	157898	237290	2658.84	96396.4	493.91	50.7771	2839.59	23.0048	1026.26	144.266
557.584	2.86464	30075.5	610.435	149329	253495	2326.61	89811.4	357.76	49.0675	2732.45	18.4311	990.05	133.319
559.968	3.32196	34161.7	622.682	159664	242971	2139.54	88084	383.245	47.1398	2765.19	22.0054	977.353	159.095
562.348	2.56839	32388.3	597.911	150032	254186	2403.25	85194.5	411.39	51.7313	2974.53	23.0716	1052.5	114.34
564.732	2.14624	34568.6	649.511	149670	253864	2323.04	84168.3	383.236	47.526	2955.13	17.7289	999.431	141.649
567.116	3.7843	32214.2	645.319	154127	246779	2566.85	91270.3	401.332	43.3084	2684.47	20.0943	997.599	144.332
569.496	5.94415	32403.9	567.571	154553	248485	2267.38	88223.1	380.061	41.6515	2782.75	13.397	969.551	136.5
571.88	3.6926	31189.7	630.605	154530	247298	2517.98	90436.8	430.741	49.6349	3356.09	20.3891	877.649	126.721
574.264	4.04966	35713.3	667.51	148222	248693	2454.59	93059	384.818	57.6627	2665.35	23.2572	985.177	131.527
576.648	2.7597	35313.4	627.361	166502	237472	2294.81	85718.9	414.834	55.0363	3101.94	30.0779	922.601	127.304
579.028	5.58176	33593.1	685.856	146015	249563	2301.94	96408.8	423.68	47.3598	3109.75	21.7401	970.086	155.844
581.412	4.46496	33753.2	726.548	157341	244275	2431.72	88921	343.434	51.6838	3244.12	25.5833	912.455	129.51
583.796	5.61136	35129.5	692.229	159724	241073	2803.71	89165.3	433.891	46.0982	2753.42	23.493	1085.19	167.196
586.176	3.54012	37127.3	531.123	158856	236125	2347.74	95899.9	526.033	41.3339	3490.84	22.0705	962.452	150.673
588.56	3.43336	32693.5	511.227	147389	254300	2148.1	89040.8	394.228	43.1379	2670.94	12.8166	911.154	129.817
590.944	2.1264	32604.1	667.121	155920	241695	2756.8	95977.1	440.421	56.9525	2740.96	21.2096	962.615	144.304
593.328	3.53413	33719.1	625.427	159562	242230	2343.93	89793.7	430.259	44.608	2608.68	21.0524	884.269	128.032
595.708	3.73721	32523	595.934	144078	257506	2382.49	88179.4	346.489	44.4928	3008.91	20.9961	970.054	104.558
598.092	1.62034	33940.6	535.931	157876	248375	2387.95	82376.2	444.046	45.7443	2720.49	19.7557	939.322	118.62
600.476	1.66703	30796.7	638.071	151363	248141	2342.08	94269.5	416.673	51.0801	2896.8	21.3891	1019.71	121.34
602.856	2.58412	38092.4	620.657	151423	240355	2757.43	99048.2	478.844	44.0947	2428.78	20.6227	1057.4	133.4
605.24	5.12811	30454.7	669.426	155512	240111	2741.2	101132	441.593	56.8104	2622.27	17.6489	980.309	134.979
607.624	3.39581	31533.7	478.867	152776	251003	2412.83	87126.8	455.218	41.4812	3175.25	23.9868	987.746	128.137
610.008	3.46652	33213	714.445	174404	227937	2618.66	91222.7	424.011	43.5666	3044.94	18.4218	1042.6	134.493
612.388	4.45776	31907.9	561.044	146974	256424	2487.21	86369.6	457.28	46.5427	2923.6	20.7077	1004.58	118.029
614.772	2.27021	33657.9	615.312	144287	256406	2475.79	88147.3	482.988	45.5711	3081.42	19.8466	947.283	139.739
617.156	4.60948	31072.5	683.236	152090	249809	2352.47	90635.2	436.325	44.1531	2600.03	18.0243	1026.6	149.545
619.536	2.80201	32605.3	673.276	148786	249913	2565.8	92843.3	394.205	47.1015	3173.86	24.5347	975.215	156.828
621.92	4.47252	33993.6	664.269	150822	243189	2228.9	99211.2	463.972	50.6782	3222.93	17.9959	1007.46	122.064
624.304	4.61729	29974.2	732.348	158214	245339	2143.75	90022.3	392.077	29.2467	3137.97	19.8837	952.708	138.479
626.688	3.20707	36107.4	630.848	152421	248089	2652.04	87402.8	442.249	47.9259	3013.02	23.8782	1016.13	130.182
629.068	2.33582	32048.9	600.577	145305	247543	2429.47	102162	348.025	44.163	3003.11	20.9381	967.344	120.793
631.452	3.86936	35532.3	597.078	155658	239858	2518.77	96367.4	411.404	45.9282	3043.58	22.2632	967.2	143.158
633.836	3.77362	33996.6	575.147	152273	242715	2422.55	98156	503.655	44.9875	2961.39	17.1526	956.082	121.53
636.216	3.0077	33450.1	609.113	145932	256552	2394.22	86417.9	452.354	42.4244	2673.35	23.7491	908.812	144.904
638.6	4.43143	33560.7	632.879	144395	252625	2837.96	93854.7	410.193	52.6256	2834.28	21.8508	952.519	121.994
640.984	1.76695	35262.9	641.529	141296	257236	2649.25	89342.7	445.893	55.5319	2858.83	20.7559	1031.13	159.737
643.364	6.47565	30124.8	568.715	153103	242018	2418.04	102266	356.477	47.954	2617.82	19.6769	998.325	151.598
645.748	1.91411	30773.7	629.524	166317	236698	2588.27	91606.5	370.612	53.6906	2692.08	24.3145	1044.17	124.514
648.132	4.65279	43425.6	610.699	149003	242851	2516.05	92989.1	419.003	45.6515	3187.32	22.3658	991.612	151.918
650.516	3.77706	31467	588.076	149042	251649	2460.69	91482.4	405.678	42.5795	2849.79	19.7065	905.865	157.583
652.896	3.40072	32981.9	712.43	150423	254862	2414.53	83314	382.572	46.2432	2673.16	22.2546	945.311	126.096
655.28	4.56901	31072.1	701.051	151787	248772	2495.36	92328.5	384.579	37.4657	2908.89	23.6678	955.58	144.952
657.664	6.03444	33773.3	624.809	146663	249464	2378.2	95153.8	454.818	50.4579	3375.45	17.7707	1084.87	138.14
660.044	1.15517	33587.7	645.747	152811	251105	2583.77	84354.7	431.409	46.6047	3458	23.3139	989.186	142.79
662.428	0.334221	36127.3	575.564	145330	250268	2630.76	93584.5	465.122	52.2854	3062.63	27.621	1074.99	132.444
664.812	3.12758	34101.4	634.471	158090	244966	2607.76	86701.2	432.12	50.1678	2714.13	21.9466	1070.36	166.987
667.196	3.32967	39071.8	601.365	153257	242679	2370.64	92338.4	430.458	49.9749	2672.06	23.2364	951.502	142.997
669.576	1.2554	32077.8	586.182	153780	246311	2773.68	92004.7	472.042	38.5082	3076.21	18.4441	1066.18	120.127
671.96	3.27536	30342	761.497	150877	246208	2352.97	97636.5	468.176	42.2981	3350.03	26.9684	1050.12	152.623
674.344	1.77529	31223.6	534.755	162228	244425	2509.57	84609.9	415.934	44.7766	3249.07	13.5622	923.555	132.096
676.724	1.63448	29924.7	638.334	152037	251934	2561.02	87781.2	476.277	50.6789	3270.19	25.654	1004.46	153.616
679.108	3.30788	31807.6	590.172	147537	246403	2383.02	101383	459.568	41.7258	2561.89	22.4138	1027.38	137.927
681.492	4.42293	33380.6	665.22	150364	250965	2541.85	88531.5	447.093	48.4828	2923.71	20.5581	1020.26	136.909
683.876	5.12791	32955.2	646.736	149309	250383	2451.87	90864	423.227	46.025	3390.73	18.4675	1138.07	131.565
686.256	4.35613	31797.1	681.907	133392	258519	2175.72	101921	358.742	35.5717	2954.07	18.8191	881.554	148.858
688.64	7.43926	29496.9	696.086	148351	255236	2384.69	88521.5	487.956	47.4872	2951.45	28.4523	964.795	139.718
691.024	4.2959	39155.3	717.259	158044	242628	2689.99	85176.6	404.81	46.9096	2985.75	19.9376	1002.43	124.907
693.404	4.28357	34276	676.651	151879	244839	2657.56	94928.5	472.5	49.308	2866.68	25.0745	993.849	123.799
695.788	3.96889	32191.9	543.901	153620	251284	2703.36	85404.7	405.763	54.485	2315.35	28.1937	1007.12	138.455
698.172	6.96156	29417.5	490.342	164322	238911	2385.72	92206	369.265	46.1185	3086.47	17.4044	1027.11	143.871
700.556	2.87748	32411.2	656.174	159478	238093	2542.35	97510.6	413.182	36.1005	2349.54	27.5319	940.249	116.82
702.936	5.63344	30052.3	610.991	140925	262085	2719.79	87422.5	432.155	43.6343	3011.81	18.2476	933.536	119.685
705.32	0.547746	33718.6	629.395	154453	245319	2525.18	91456.1	508.917	60.0175	2778.42	32.2592	974.022	140.017
707.704	4.44369	32277.2	628.97	144317	259582	2253.51	85256.8	348.702	48.3646	2628.64	19.4109	1038.96	128.974
710.084	3.72933	31842.6	543.881	147236	252008	2322.85	92993.9	386.267	40.2084	3017.16	19.9045	997.531	133.795
712.468	4.24514	36904.8	634.112	167703	228986	2492.63	95177.9	379.827	43.8222	3250.62	19.0538	1046.34	128.696
714.852	5.26823	32661.8	541.735	155473	240269	2461.88	99376.9	341.834	40.591	2658.89	21.3013	906.123	123.092
717.236	2.40449	34118.6	586.97	155232	238272	2540.98	100892	381.777	49.7332	2838.69	18.3109	1053.54	122.993
719.616	4.14251	31124	673.078	150109	255409	2422.74	84612.3	417.365	41.4225	2705.15	21.9014	989.823	144.164
722	5.09239	30194.5	645.201	141440	261595	2552.5	87893.8	434.025	39.3876	2468.39	25.5255	972.091	135.245
724.384	3.65598	32513.9	673.701	152305	250379	2358.84	88092.2	395.785	49.503	2713.04	22.9855	971.185	126.34
726.764	3.22849	32595.2	587.382	172396	234733	2503.55	84078.2	549.714	54.8722	3289.33	24.2612	949.727	133.566
729.148	1.59662	29098.5	595.614	145758	259852	2252.92	85988.9	326.355	47.3315	2832.16	17.9871	870.634	129.331
731.532	4.4323	30389.3	563.12	156750	244262	2877.14	92570.1	417.025	52.2149	3269.92	21.3601	1041.29	135.033
733.912	3.02741	31318.2	726.16	163984	236018	2408.95	95383.3	391.064	45.7049	2644.14	22.6537	976.589	140.848
736.296	4.04249	33588.1	613.706	160700	238374	2542.43	93800.2	399.129	48.4155	2871.08	24.7523	1013.66	132.203
738.68	2.69423	33318.8	660.002	156177	245592	2317.16	89004.2	394.082	47.2131	3129.12	23.747	1067.99	121.977
741.064	2.76329	31570.4	690.235	151486	249641	2297.9	90887.6	345.962	58.1097	3160.75	16.8994	1000.43	130.972
743.444	1.94511	31391.1	679.175	141986	258869	2386.63	90086.8	370.106	43.224	2839.89	16.6567	902.151	122.792
745.828	1.86919	33086.8	585.206	159760	244380	2495.55	86470.4	420.501	52.8846	2832.59	23.565	991.067	134.886
748.212	3.99394	35127.4	573.088	155748	240863	2375.84	95720.1	404.377	49.0342	2519.14	25.5026	994.132	133.52
750.592	1.6303	32638.1	610.355	152437	245288	2587.47	95100.7	446.095	39.4093	2963.98	21.9172	1062.87	127.713
752.976	4.28323	33565.6	724.741	151928	243325	2545.48	97802.6	403.903	44.2885	3041.29	21.0113	1031.55	119.167
755.36	4.50207	34998.3	567.343	161770	240730	2532.27	87380.6	454.179	49.089	2895.1	18.8927	1005.67	130.765
757.744	1.35638	33655	559.404	146080	252626	2262.7	91938.2	352.085	45.7378	3035.95	17.3705	976.907	135.291
760.124	4.27654	32742.5	588.795	154938	244993	2420.19	92805	364.547	40.9293	2565.57	18.2827	946.041	126.297
762.508	1.84452	34579.4	638.183	150309	247696	2696.9	92036.9	457.983	42.9341	3265.4	19.7879	1012.99	138.344
764.892	2.47526	33046.5	513.617	153413	246417	2444.41	92362.5	330.037	42.525	2708.92	22.0236	962.26	118.489
767.272	3.24075	32865.7	575.642	148194	251720	2439.01	91768.8	403.954	31.0615	2240.76	18.8961	954.665	117.757
769.656	3.82079	33653.1	662.566	165528	230848	2636.01	98374.3	359.918	49.4938	3115.75	21.0584	1051.4	134.969
772.04	1.32663	30280.2	633.95	135871	268309	2174.7	85007.6	415.552	40.8782	2966.66	20.6459	959.203	110.141
774.424	6.77037	33737	590.086	177876	227784	2406.29	86601.6	408.821	47.3199	3016.41	20.6586	1056.22	152.554
776.804	3.50911	30008.4	645.523	158657	240569	2604.79	96878	372.895	32.7123	2588.12	17.6867	1016.88	121.558
779.188	1.51848	30194.1	587.222	142615	264292	2181.78	82769.7	363.009	40.7183	2400.26	20.4699	948.052	107.86
781.572	1.6342	33290.4	621.659	145446	249397	2227.3	98582	438.503	56.8296	2357.28	24.4999	960.362	103.063
783.952	3.20011	32406.1	619.14	160294	241208	2571.97	91209.1	452.44	46.8364	2728.67	33.5946	981.99	134.661
786.336	2.93883	33197.1	670.962	156116	244877	2459.67	90721	363.972	49.0065	2604.2	26.842	979.458	158.143
788.72	2.36063	32237	702.171	158872	241629	2581.93	92376.6	428.255	50.696	2968.85	26.3158	978.185	107.622
791.104	4.27403	33150.6	611.749	149426	242118	2682.88	103372	460.026	42.2432	2990.92	29.9387	1054.87	148.512
793.484	1.17967	31580.9	635.678	142330	251123	2597.11	101449	411.388	45.7343	2443.77	22.1433	909.774	131.343
795.868	2.09222	32269.4	601.471	158394	244076	3217.62	88755.1	412.439	52.3514	3042.77	22.9659	962.825	148.749
798.252	5.65733	33696.6	626.679	145683	254666	2606.64	89160	420.991	56.9243	2697.39	19.0948	966.516	132.211
800.632	4.99218	29932.7	775.579	136794	268351	2210.21	84320.2	325.325	45.8041	2576.07	16.5832	920.723	117.513
803.016	6.61036	33461.9	592.952	155803	247107	2286.93	87201.2	418.954	49.6973	3069.67	21.617	1031.74	132.373
805.4	4.48245	33645.8	545.099	169128	229070	2351.72	96931.4	402.824	44.5828	2790.68	17.4324	994.274	127.554
807.78	3.96463	31600.1	531.982	164735	241165	2393.52	86366.4	363.036	44.5029	2895.12	14.6796	909.396	105.209
810.164	7.45194	32569	688.365	158470	234624	2675.7	103465	433.012	35.2455	2723.08	24.3338	954.721	145.292
812.548	4.41116	33964.7	680.575	149357	250293	2591.18	90306.7	549.354	43.8692	2896.58	18.405	929.856	105.797
814.932	3.67302	33267.5	718.42	168259	224034	2358.87	105575	395.346	44.2349	3191.19	19.5652	1025.22	123.408
817.312	3.98951	33077	620.686	147780	257577	2333.69	82508.2	414.943	52.0895	2961.9	29.3582	949.124	114.476
819.696	3.84454	32622.6	620.583	161513	244666	2299.59	84458.3	404.68	47.3526	2731.55	17.2508	880.711	127.54
822.08	2.04285	33772.6	617.025	148237	238459	2480.11	110326	470.577	40.7573	2889.16	25.5999	965.086	123.348
824.46	2.79809	37319.2	632.777	150289	246556	2433.43	91341.3	431.999	54.6422	3366.11	22.2501	1006.93	124.389
826.844	3.29825	31706.9	587.922	148371	251746	2305.47	92169.9	459.03	44.6631	2698.56	22.8355	992.103	121.607
829.228	5.29787	30455.6	624.524	159286	241148	2766.46	94252.9	485.247	43.1095	2879.83	22.4562	908.493	144.054
831.612	6.27418	29852.2	595.982	147894	254060	2714.21	90651.8	384.229	48.5807	2838.12	17.2824	1005.76	114.843
833.992	2.10319	32397.1	585.221	155990	243611	2625.06	93020.1	456.789	41.8005	3084.47	16.6953	1012.01	127.119
836.376	4.57877	30713.5	661.176	161264	239151	2220.88	95110	333.089	50.4541	2719.35	23.7671	950.318	130.936
838.76	3.4027	33823.9	643.783	150377	247447	2739.8	93708	360.149	63.2017	2622.83	14.7168	1006.4	135.741
841.14	2.14033	30791.5	609.828	149849	256824	2547.63	83494.3	383.077	47.6065	2404.2	19.0672	903.344	123.272
843.524	0.749669	33631.7	739.359	152838	247574	2473.33	90210.7	443.964	61.8569	2829.13	24.6586	991.157	137.338
845.908	2.73154	29704.7	645.295	157850	250726	2431.67	82423.7	474.675	40.7036	3014.31	22.7371	949.912	107.801
848.292	3.31854	40959.1	509.972	165770	229674	2332.3	93632.6	348.929	52.838	2813.19	25.762	939.015	128.178
850.672	2.72227	32666	616.666	146710	247931	2523.9	98591.2	448.587	52.0519	3247.52	21.6779	1007.63	119.043
853.056	5.46788	31821.9	653.058	165061	238005	2490.9	89851.9	431.933	35.5534	3180.46	24.9853	1035.9	116.991
855.44	3.19248	30811.4	593.684	160412	234994	2248.43	102450	420.039	45.9048	2699.41	24.7379	1013.28	124.615
857.82	3.94613	36427.8	650.501	148083	246171	2797.33	95936.9	445.189	50.0496	2811.11	20.9356	999.164	125.209
860.204	1.36219	30278.2	594.272	158356	242617	2777.79	93342.5	374.947	45.9278	3172.02	23.4645	888.459	144.584
862.588	4.14653	34558	554.411	161704	237125	2319.94	93786.8	380.416	45.6108	2751.63	21.1005	1042.2	141.987
864.972	2.85822	31229.4	607.223	155188	248430	2444.99	88320.3	443.47	44.1958	2779.8	19.7047	947.8	140.408
867.352	4.32261	31945.5	519.366	151352	248414	2559.22	92985.6	360.195	42.5235	2720.32	16.1602	980.38	121.19
869.736	3.85661	32383.9	694.291	153479	246392	2266.98	92469.8	480.981	46.5182	2985.76	23.6718	919.303	135.611
872.12	1.42313	32786.6	613.766	143223	254554	2488.13	93403.9	428.026	48.866	2931.8	28.4872	959.627	170.429
874.5	6.75934	36600.7	579.316	155962	240639	2381.75	93931.8	436.362	46.4297	2943.8	23.3721	974.585	132.273
876.884	3.14893	34345.6	537.528	167274	236134	2761.09	87421.6	416.186	61.373	2925.7	25.1201	1027.92	136.928
879.268	1.43319	32609.5	645.48	148405	252401	2592.02	89859.2	477.769	46.3856	2797.46	23.2959	938.425	135.385
881.652	3.4739	32190.5	631.792	155780	242893	2718.11	94816.1	402.042	48.2082	2808.1	28.4588	940.393	138.88
884.032	0.72817	33000.8	649.832	158207	246504	2211.08	85599.2	360.779	47.2198	2876.68	19.9942	1025.02	113.885
886.416	3.19516	31066.5	608.498	137690	261301	2515.75	92344.6	386.506	50.4083	2897.4	17.5127	935.592	123.653
888.8	3.50303	29456.9	608.483	150417	250847	2270.96	93162.3	422.313	47.0159	2477.77	23.1727	1028.93	127.984
891.18	4.99646	32100.6	610.422	158752	243710	2380.31	89892.6	392.543	35.0985	2979.31	14.9219	897.547	107.401
893.564	4.09232	34211	707.978	156272	238777	2550.77	98453.1	398.957	51.1871	2875.46	21.2708	990.323	140.619
895.948	0.774434	35650.3	728.813	150300	244651	2685.52	95786.5	442.875	54.7751	3042.03	25.0254	1014.86	134.412
898.328	4.82943	28416.8	705.349	145243	261788	2303.35	84257.1	400.193	48.4165	2637.9	18.2828	932.534	108.073
900.712	1.43156	32525.9	506.685	159510	238412	2428.54	96158.5	455.218	63.6939	3199.96	16.4579	1085.21	138.553
903.096	3.16649	33953.8	650.908	158078	233849	2887.67	103709	341.971	48.0641	2822.15	20.7021	969.995	145.027
905.48	4.95259	35043.4	706.355	152714	245932	2514.75	91275.2	409.196	43.2186	3110.89	24.3359	1069.86	115.655
907.86	4.21289	31142.9	618.931	150402	247520	2200.94	96371.4	407.115	39.1062	2848.79	21.7351	1026.25	137.359
910.244	0.738755	31150.7	618.404	144825	254443	2524.64	92797.1	411.182	53.833	3171.95	19.338	944.232	133.745
912.628	3.3625	33311.3	620.355	156941	241893	2421.49	94354.2	464.89	49.9304	2326.66	20.2067	944.1	117.295
915.008	2.4849	33084.7	549.808	157703	245769	2539.17	87636.2	339.6	53.3176	2431.41	24.421	969.427	104.279
917.392	5.00398	32310	542.937	154002	250285	2745.99	85924.3	413.069	47.865	2702	25.2631	995.478	131.698
919.776	2.3384	32681.9	714.265	162192	240172	2713.62	89389	463.547	47.9403	3116.81	20.6732	975.964	117.891
922.16	4.92774	32244.3	569.982	158701	238175	2429.75	98442	447.867	43.3011	2560.17	19.4663	1064.52	129.016
924.54	2.98648	32865.3	604.704	155746	248512	2584.58	85739.6	461.04	40.2688	2703.01	24.5537	1033.58	123.198
926.924	4.78678	31491.3	512.211	144814	258007	2345.31	87686.4	363.237	45.3484	2746.98	24.4381	1018.6	146.128
929.308	5.15649	33175	604.894	158565	241942	2501.69	91719.9	420.423	48.0877	2787.94	19.1959	1014.01	138.571
931.688	3.69875	28906.9	571.228	152686	248310	2383.74	94458.8	354.219	49.099	2662.31	18.9271	921.703	125.97
934.072	3.64887	33582.9	588.591	159733	241620	2533.12	90268.9	360.029	50.0899	2809.36	19.7516	1046.03	127.292
936.456	4.07619	30990.1	622.186	152719	241497	2552.91	102450	476.316	51.894	2596.24	21.4727	1009.28	130.968
938.84	2.85357	32631.8	552.766	151914	240126	2676.98	103747	432.328	48.0269	2952.23	22.8379	1038.49	110.409
941.22	1.97174	31404.3	566.24	162302	245361	2502.73	83831.3	444.003	46.2898	2199.58	17.4724	878.085	139.074
943.604	3.51347	32325.1	601.769	146522	252343	2635.33	92684.6	402.527	45.7246	2919.69	20.5362	1021.19	137.95
945.988	3.42271	29363.2	761.174	145938	259607	2293.25	85480.9	468.849	59.0051	2748.64	15.9121	940.396	117.232
948.368	2.68938	32805.8	553.202	155604	238985	2279.81	100812	378.366	51.5527	2792.89	21.8819	1101.58	144.982
950.752	4.31548	33309.8	593.744	152321	245027	2440.54	95093.5	416.568	56.9055	3154.43	23.3263	946.605	127.003
953.136	2.88856	33310.7	635.019	154514	244572	2504.29	92717	408.207	52.4093	3142.64	16.8725	1023.63	93.254
955.52	5.62893	32985.4	661.919	145448	252794	2352.6	93296.9	394.675	49.9531	2680.55	18.0027	935.281	114.368
957.9	3.94536	35097.5	694.18	163114	231876	2571.13	98761	473.054	47.1695	2898.01	19.5479	1037.26	147.554
960.284	3.74192	32335.4	573.43	152774	251665	2331.66	85351.7	409.164	52.8071	3234.48	20.6212	956.841	90.7716
962.668	5.18034	30255.5	654.051	156282	248568	2117.2	87681.2	466.599	42.1583	2866.15	18.9585	957.973	140.053
965.048	4.08183	30183.8	623.807	137807	265555	2444.59	87003.4	426.734	47.4122	2431.38	20.1672	892.434	108.294
967.432	2.82749	33027.7	530.944	141379	253487	2399.88	97833.2	382.881	43.9958	2655.94	24.7067	914.473	153.75
969.816	2.77219	33245.2	552.909	145295	255770	2409.32	88677.4	346.849	46.7449	2849.97	13.5329	961.926	108.831
972.196	3.23484	30225.5	601.2	144011	257268	2483.21	90640.8	414.69	50.3042	2929.95	24.2362	1051.93	139.685
974.58	4.95731	34095.1	653.178	153692	245428	2653.6	92085.7	415.591	47.8242	2588.82	27.2576	1000.38	143.174
976.964	3.19649	31343.9	910.622	149239	254607	2275.07	85805.7	505.437	44.586	3550.17	22.9485	970.075	111.874
979.348	1.75867	34177.7	588.061	167058	236124	2422.02	88286.7	420.928	62.6382	2838.18	21.2552	928.567	135.259
981.728	5.09	34330.7	673.282	150894	250453	2790.54	86760.7	490.912	52.5764	2962.94	24.3399	1721.1	150.214
984.112	1.97563	33386.5	711.393	158681	241676	2683.79	91196.2	412.362	51.971	3112.36	22.337	1006.08	141.947
986.496	1.90097	30220.2	457.255	130467	274640	2018.96	83516.7	385.721	48.5149	2574.62	21.1835	858.81	89.1897
988.876	2.37873	32587.7	526.568	158306	238573	2239.81	97899.7	384.508	38.2629	3115.11	17.4019	989.193	117.717
991.26	3.90155	33960.1	550.749	145456	259126	2598.34	82254.9	423.319	49.6005	2980.07	18.9798	936.402	143.067
993.644	5.02062	35651.8	643.879	152483	243599	2509.64	95221	417.9	51.4927	2511.02	16.7611	1007.87	140.3
996.028	1.8021	34919.6	595.747	158757	234719	2357.53	100809	399.616	47.0495	2976.76	18.3211	1031.69	128.758
998.408	3.58836	31659.5	607.81	155413	244931	2612.63	92677.6	454.727	43.1732	2907.96	23.4658	970.945	109.799
1000.79	4.95245	32600.8	574.413	154079	253152	2229.86	81012.8	424.441	50.9961	3331.07	23.0128	932.197	148.236
1003.18	3.77459	30389.7	558.778	152832	246921	2551.42	94061.1	423.479	43.4367	3244.55	20.1355	1089.61	139.296
1005.56	2.94958	33072.5	695.504	158466	242768	2601.23	90003.8	481.557	44.7886	3242.97	17.2747	1013.92	150.482
1007.94	1.94479	31299.7	509.148	146267	260471	2221.73	82449	377.921	41.5267	2575.13	20.6825	976.753	132.396
1010.32	5.31377	37104.2	585.083	164881	239395	2300.29	83317.8	449.64	40.9044	2962	24.1334	999.881	135.987
1012.71	3.60989	30565.5	681.237	153018	247001	2248.99	94086.7	402.183	37.0499	2894.79	15.8241	980.326	135.621
1015.09	5.16281	29935.3	636.896	156874	245500	2245.56	92209.6	346.907	42.8451	2627.34	15.8784	902.527	131.59
1017.47	4.41681	36111.3	653.49	174985	227167	2396.27	89373.9	387.523	48.8825	2818.98	26.7196	998.134	120.983
1019.86	5.58444	31471.8	531.048	149613	254233	2510.54	86879.7	382.867	46.5217	2773.17	18.5656	949.274	101.889
1022.24	2.42283	32474.5	586.321	156570	246812	2531.75	87650	485.972	34.9539	2704.35	19.486	1000.72	156.365
1024.62	2.59868	33162.9	600.372	153874	242518	2166.02	97962.5	355.187	47.5552	2391.04	19.876	963.749	144.96
1027	3.72493	33329.1	640.634	160187	229053	2544.09	108843	410.034	54.1023	3014.26	22.5806	966.98	143.058
1029.39	2.33725	34691.3	694.599	149269	251347	2445.45	88353.4	426.301	41.4853	2916.04	24.4653	908.217	126.944
1031.77	4.23755	33099.9	596.981	149551	246957	2251.22	96270.8	491.943	46.9607	2992.43	16.0443	996.718	134.508
1034.15	3.89341	33148.7	578.618	152843	248204	2314.17	89944.3	413.419	49.3992	2955.33	22.7312	1001.15	148.657
1036.54	3.0146	34712.8	566.287	156260	248913	2402.39	82819.9	511.541	36.8634	2782.83	19.4907	925.421	123.709
1038.92	3.28264	33397.3	571.195	146209	257944	2316.84	84089.4	338.515	52.4054	2792.56	21.9062	924.601	136.552
1041.3	2.23203	33106	720.938	144335	256409	2514.82	88443.4	419.818	47.4893	3131.28	18.6788	1006.12	122.403
1043.68	2.63725	34800.3	730.695	153452	246604	2321.03	89935.3	348.559	57.3431	2889.37	21.2275	1018.07	118.169
1046.07	0.708849	34518.3	745.555	148100	253111	2559.82	86866.9	447.016	52.3198	3195.83	21.9343	1009.9	128.814
1048.45	4.83062	34343.9	607.24	140813	255612	2665.57	93486.2	455.643	47.5305	2848.89	16.8744	954.703	124.855
1050.83	2.30102	33640.6	540.173	147915	249858	2474.3	93431.4	474.203	47.5629	3015.09	24.6737	953.191	132.946
1053.22	3.59289	33393.3	571.263	161295	237154	2562.51	94740.9	423.786	42.7919	3277.55	20.0305	957.515	125.76
1055.6	3.76126	32505.2	617.439	160072	243366	2699.28	87906.7	454.297	47.7539	2774.62	16.1439	1067.5	128.613
1057.98	3.07163	27042	629.195	157114	246656	2400.63	92401.8	368.925	43.3078	2886.71	20.5733	1032.15	135.467
1060.36	3.43498	36625.7	579.144	163849	237186	2353.65	88249.2	504.466	53.6343	3181.31	27.6361	972.216	143.302
1062.74	3.57122	33072.9	604.807	156661	241637	2363.73	95127.9	436.507	49.7614	2610.98	22.0338	1013.4	123.608
1065.13	2.24591	35939.6	495.082	150531	239004	2106.41	104705	470.058	48.887	2941.25	19.0718	988.793	122.943
1067.51	0.701437	38189.8	531.24	162410	232538	2629.06	95789	484.397	41.7309	2969.67	22.1605	1058.12	128.111
1069.9	2.55021	33083	595.888	152576	245887	2371.51	94171	378.136	45.0984	2690.87	21.5609	995.548	108.269
1072.28	4.5048	32981.7	617.509	160891	237810	2399.78	95243.4	508.649	44.3646	2584.13	15.0967	1003.92	151.952
1074.66	0.88955	32338.9	695.753	164338	234104	2548.19	96422.6	437.927	52.1442	2861.48	22.4837	1091.73	125.509
1077.04	3.19195	33067.1	618.356	144422	259227	2423.95	84715.3	408.399	53.4647	2748.29	21.5983	874.619	130.023
1079.42	2.31246	31191.6	596.271	141391	254541	2371.52	97847.3	484.446	50.011	2674.42	15.6877	885.229	107.677
1081.81	3.89944	32128.3	557.728	141556	256329	2507.28	93834.7	462.788	40.72	2713.78	18.3641	954.85	128.699
1084.19	2.62346	33439.9	721.089	148728	250987	2456.74	90880.2	413.889	58.3616	2810.16	23.9202	918.532	136.272
1086.58	4.82631	32638.9	604.98	168252	233695	2562.97	91705.4	381.319	47.9515	2841.86	18.2707	1035.82	122.051
1088.96	1.59949	35553.4	602.236	144538	253115	2394.07	91634.7	374.363	43.9429	2674.66	18.666	929.014	123.236
1091.34	2.39678	34839	538.052	159770	240993	2421.51	89723.9	479.937	46.5615	3134.55	20.9796	984.791	143.486
1093.72	4.48849	33390	762.123	152778	243855	3079.26	95384.3	452.871	55.4039	3091.07	26.7668	1023.97	133.592
1096.1	6.13447	33318.5	697.665	155561	246289	2555.24	88469.6	418.882	48.941	3123.38	24.3787	1088.12	124.425
1098.49	2.70132	32973.9	666.666	148663	252393	2156.31	89139.8	515.103	42.0193	3173.22	21.4562	935.083	134.601
1100.87	3.43385	31329	645.8	153674	244492	2456.67	96348.9	333.239	57.7764	2772.44	22.5782	990.301	106.497
1103.26	3.45997	33356.9	729.602	158170	239651	2264.65	95297.2	452.92	61.3255	3108.03	23.4339	1007.77	135.469
1105.64	2.97209	33296	605.464	145178	251744	2486.1	94488.4	412.896	44.3059	3131.57	20.2884	933.946	118.994
1108.02	2.16685	37029.3	632.537	153811	240962	2511.39	95846.9	363.385	43.4427	3023.31	19.9186	903.687	124.336
1110.4	2.42763	33405	596.313	154672	244618	2408.76	92666.2	380.711	56.3679	3029.02	21.7161	907.92	133.308
1112.78	3.06242	30533.5	667.827	153768	247117	2461.91	93290.4	405.876	41.548	2322.12	19.5275	968.597	128.351
1115.17	1.45564	33525	581.007	143508	260513	2361.84	84091.4	459.691	44.8973	2224.45	11.512	861.731	130.498
1117.55	0.959769	38803.7	680.012	161560	233427	2763.91	94827	470.886	53.9894	2874.5	23.7054	983.221	155.386
1119.94	3.79188	33479.2	627.558	163429	240132	2439.08	87086	359.473	51.11	3519.44	14.3056	996.114	120.313
1122.32	2.86943	32797.7	611.243	145117	251420	2314.47	95793.7	404.323	46.8521	3014.75	21.4357	940.892	122.262
1124.7	1.07972	29326.9	495.576	137627	270980	2284.52	80085	418.479	44.2247	2410.19	22.083	906.658	116.236
1127.08	1.19284	28634.3	581.564	207869	204814	2352.47	86890.3	431.636	42.983	2469.15	17.4747	850.804	109.775
1129.46	4.03957	36621.3	724.641	156745	241645	2983.37	90374	494.025	43.7886	3151.4	18.6779	970.168	140.203
1131.85	4.18706	32851.4	530.837	152912	248485	2254.32	90075.3	378.345	52.407	2820.65	15.7788	914.204	127.509
1134.23	5.60932	35965.4	696.312	148498	242697	2395.89	101569	388.276	38.9164	2723.55	19.0435	1006.54	134.504
1136.61	2.72857	32188.9	562.09	146799	246885	2270.96	101270	358.813	45.3505	2854.25	20.7336	1007.41	140.96
1139	2.59546	30642.7	577.02	150084	260719	2325.1	77509.1	323.336	42.9653	2541.22	20.0404	944.916	122.41
1141.38	2.23392	32846.4	685.852	145811	256133	2298.61	87953.9	314.477	35.2409	2675.21	15.8533	939.167	136.125
1143.76	1.92945	35478.5	591.327	146806	253680	2314.89	87584.5	386.304	59.8815	2908.48	19.7211	951.993	137.706
1146.14	3.12968	32706	518.118	149195	247109	2469.42	97139.3	413.986	48.3667	2789.88	19.3289	931.335	130.89
1148.53	3.97886	33304.3	685.721	147194	243023	2452.66	105052	454.487	37.5945	2961.58	23.6779	1021	128.116
1150.91	4.15508	32902.7	565.116	150541	242513	2504.86	101368	382.981	41.948	3546.37	15.7927	1002.68	122.529
1153.29	2.57078	31357.4	543.506	152905	249759	2410.27	89235.7	375.872	53.4079	2959.89	23.5324	985.09	129.242
1155.68	4.33339	33910	743.085	155558	246761	2522.35	87273	427.923	55.2798	3074.59	24.4477	956.651	156.146
1158.06	1.56217	35130.4	657.674	157388	239752	2243.13	94905.6	343.314	41.0593	2936.6	19.4051	1004.83	142.133
1160.44	2.51489	30061.3	591.113	149708	252781	2416.49	90406.1	400.973	49.6368	2683.5	22.6987	934.395	109.437
1162.82	4.36803	34241	591.663	153565	243420	2813.21	95082.6	408.003	46.6105	2604.68	23.5529	1052.14	136.39
1165.21	3.15084	35732.1	667.911	148688	247911	2655.8	93355.2	393.29	47.5374	2739.97	23.3538	993.338	136.11
1167.59	4.46325	38676.6	566.692	153499	241830	2409.14	93879.9	287.425	48.6927	2684.44	25.3572	933.339	131.727
1169.97	3.4069	33710.9	602.694	163244	241196	2734.39	85712.8	342.259	52.6748	2990.29	25.9564	1024.93	144.652
1172.36	3.84397	33566	560.305	172353	233454	2391.42	85673.4	470.262	50.5154	2998.02	24.9494	945.595	108.223
1174.74	3.63298	30699.5	685.673	155643	240336	2430.32	100287	394.853	46.8125	3009.01	13.5005	1029.97	147.185
1177.12	6.69878	31375.9	560.72	152100	241858	2586.48	101047	377.05	55.7593	4249.94	24.4715	951.185	126.853
1179.5	0.266643	35070.1	685.289	158495	239109	2362.77	94158.2	452.626	51.4538	2917.44	29.9168	1059.06	120.406
1181.89	0.249514	32447.9	663.284	157505	241046	2516.59	93972.5	461.974	43.8162	4064.5	24.8614	977.149	114.301
1184.27	4.79752	32030.7	562.266	152960	241240	2566.6	101307	422.36	61.6445	2905.86	20.9887	1030.31	156.038
1186.65	4.19727	31485.5	607.902	146348	253672	2499.03	92072.5	522.981	51.3311	2572.49	25.868	923.462	113.679
1189.04	3.08045	28985.1	477.164	140374	272065	1979	75618.5	346.277	41.0005	2298.09	20.0039	801.655	105.151
1191.42	2.6444	32436.2	625.417	168519	236254	2415.43	87557.1	375.085	47.1427	3051.76	26.7053	1005.45	131.83
1193.8	3.23313	30719.2	586.98	140842	262174	2708.11	87013.2	465.706	46.4454	2746.91	20.699	906.315	129.8
1196.18	3.8715	30569.3	704.268	155009	243373	2546.01	96369.8	399.158	50.2616	3233.21	18.9714	931.994	143.925
1198.57	3.59335	35222.1	591.481	147601	241577	2597.27	105002	401.206	48.5928	2873.11	19.0807	1005.54	134.748
1200.95	1.76156	34399.5	586.106	162013	239335	2730.55	89529.8	440.109	63.095	3012.38	17.5307	938.166	129.023
1203.33	3.97651	31902	618.853	160709	239947	2462.12	92674.8	414.781	58.9683	3301.27	20.4719	973.788	141.506
1205.72	2.40056	38217.5	596.254	144298	244239	2322.8	102634	430.671	52.9753	2942.75	22.9848	1024.77	111.347
1208.1	3.67784	32964.7	572.598	160421	247567	2520.98	80850.9	386.288	40.9372	2915.7	16.4027	929.717	128.081
1210.48	4.95386	30893.7	614.731	154578	242167	2888.74	98479	466.577	46.1438	2865.25	19.7198	1036.44	125.338
1212.86	2.46721	33377	676.54	155652	235524	2307.66	105420	436.526	40.5265	2813.51	27.2313	901.429	125.179
1215.25	5.22461	31992.6	663.621	153253	249082	2500.53	89317.7	379.218	55.1953	2582.01	19.4742	981.198	123.031
1217.63	4.10002	29432.6	595.004	144857	260729	2338.27	85158.6	525.944	40.3445	2805.36	21.8055	976.823	138.918
1220.01	4.3562	30614.1	649.104	149777	251373	2960.38	91534.7	457.744	59.1597	2467.93	19.7867	890.489	133.367
1222.4	0.0228719	30832.5	563.077	148878	254354	2436.96	88164.8	401.077	47.0576	2865.75	24.5838	996.883	125.969
1224.78	4.73201	32844.9	627.164	149665	246566	2613.8	96690.6	431.806	60.3139	2997.7	26.3797	962.346	128.92
1227.16	3.61757	32942.8	558.922	154256	243960	2524.82	94454.8	455.707	38.238	3201.91	17.7679	854.519	113.958
1229.54	2.75918	29076.9	764.864	131841	271350	2443.04	86923.7	331.053	41.718	2715.31	21.4046	935.019	108.618
1231.93	3.76975	32101.2	511.662	145309	257642	2366.21	86995.4	419.56	50.0841	2696.06	18.5193	964.733	150.747
1234.31	2.44075	33385.4	625.814	151803	247987	2550.69	91188.3	403.537	59.9764	2989.62	18.1244	991.766	135.911
1236.69	1.36752	31783.7	518.246	158885	238117	2550.11	98665.9	391.239	50.7855	2653.93	15.6157	1055.52	138.681
1239.08	1.8766	31621.6	657.081	154417	244647	2573.42	94528.1	398.967	49.3122	2904.46	29.5146	956.035	127.248
1241.46	2.32527	31371.8	529.359	149398	246199	2693.1	99380.8	391.162	43.34	2784.21	19.7254	912.663	140.869
1243.84	2.3575	36621	656.501	155103	245319	2355.94	87877.1	356.612	57.5531	2986.73	18.1293	999.4	138.997
1246.22	0.922792	32622.8	607.714	153758	243158	2447.85	97203.8	409.235	39.6084	2479.75	20.7833	1035.77	155.206
1248.61	2.70871	32006.1	629.687	158015	237776	2173.31	100085	388.132	48.6772	2955.39	26.3667	1023.82	137.748
1250.99	2.34716	34634.3	601.947	158763	241457	2407.39	90909.3	444.857	30.6175	2810.13	20.7599	916.4	157.5
1253.37	4.4356	33330.6	871.863	162084	238156	2231.79	92477.7	405.151	42.6294	3014.07	20.7039	889.295	94.6305
1255.76	2.27988	34194.1	670.516	163561	231687	2699.78	99116.7	448.531	46.8627	3040.84	21.8968	1048.56	155.414
1258.14	2.50583	37152.9	584.314	162394	232749	2464.72	96706.7	420.125	58.3886	2899.37	24.4358	1028.48	136.04
1260.52	5.93278	32333.5	628.571	151720	241334	2394.47	102909	429.428	48.7788	2759.71	17.6979	876.417	124.541
1262.9	3.5869	33143.2	577.582	151862	246667	2575.77	93787	411.69	48.2931	2599.33	20.3318	960.262	125.624
1265.29	0.233729	31213.2	611.148	153747	247862	2424.37	90453.9	420.7	48.4399	3491.68	26.7477	1029.22	149.377
1267.67	5.70258	32277.7	580.522	143203	262135	2594.53	82127.8	376.159	39.3402	3140.89	17.6624	1043.97	121.426
1270.05	3.66273	33433.4	809.923	152161	247651	2446.75	91332.1	457.335	55.9729	2600.15	20.426	1004.62	127.632
1272.44	3.71238	32851.5	681.046	153110	246931	2753.54	91470.4	336.869	61.0911	2947.89	19.6593	925.486	149.444
1274.82	3.20248	32825.2	635.21	143940	256518	2220.47	89988.2	445.773	37.0831	2552.31	20.9155	967.127	107.526
1277.2	1.33904	30217.5	686.399	152572	251094	2476.78	88283.6	420.332	47.7769	3123.83	23.5043	1018.68	136.485
1279.58	2.42148	35671.7	594.211	144601	256757	2535.78	85159.4	484.096	44.9603	3192.61	18.0315	908.946	128.771
1281.97	5.83185	33927.3	604.652	151553	244695	2497.04	96585.2	361.875	46.7671	2538.29	18.7875	991.028	129.402
1284.35	2.20817	30382.4	561.954	158375	242490	2424.36	94165.8	437.851	45.0932	2595.76	20.1942	932.943	152.303
1286.73	2.26765	33203.9	789.422	150571	247061	2454.34	94103	485.795	44.8816	3122.74	20.7423	1017.81	133.398
1289.12	3.3551	32234.4	679.248	149418	247256	2496.44	96923.1	411.33	45.9747	2642.99	28.7121	1034.13	99.5166
1291.5	4.60331	33345.8	598.681	147550	249847	2300.16	94581.7	428.529	44.3097	2753.92	18.3569	975.281	140.139
1293.88	0.0104992	33173.2	586.897	154828	251774	2573.51	82222.2	425.034	53.9281	2225.59	21.1108	1008.07	126.155
1296.26	2.44995	34840.2	678.519	150791	240966	2390.51	101787	462.47	49.5779	3095.02	22.5261	1014.02	131.169
1298.65	2.39091	32469.9	587.501	154515	244973	2484.41	93526.7	401.945	47.8007	2574.77	28.2294	975.725	124.465
1301.03	1.45953	31039.1	611.791	141272	263605	2169.88	84442.7	368.231	41.0502	2769.91	16.7324	944.913	129.392
1303.41	0.451026	35267.3	647.139	151786	244767	2485.9	94656.2	427.993	50.8082	2652.79	19.9655	981.518	127.786
1305.8	3.86198	29306.6	657.463	157633	244376	2426.62	93178.1	475.696	42.4039	2569.66	20.7112	955.812	135.771
1308.18	3.67178	31824.8	661.911	153588	240848	2230.3	101905	380.467	52.6851	2468.09	21.5422	1047.93	118.942
1310.56	3.41688	47675.8	575.775	145420	244885	2371.99	90477.2	456.48	39.6903	3553.85	16.5198	959.59	115.493
1312.94	0.862864	35060.8	603.496	157488	247136	2354.23	83788.8	406.944	52.2946	2615.01	16.9271	947.746	128.629
1315.33	4.35227	32117.9	571.506	147565	250213	2328.26	95165.9	388.481	29.2071	2863.63	23.107	952.468	144.231
1317.71	3.5581	32996.2	710.821	148819	247918	2533.64	95791.5	376.636	37.7134	2811.43	23.253	1036.67	126.158
1320.09	2.2593	32187.6	576.589	153451	243707	2468.34	96913.7	423.453	45.2449	2878.46	22.1572	937.128	149.576
1322.48	2.78504	30565.2	565.089	151736	243462	2423.35	101227	334.763	55.9833	2975.79	24.2585	966.653	114.081
1324.86	5.65887	36334	597.181	159870	230426	2307.46	104373	345.854	50.2995	3243.23	15.9936	1001.88	145.507
1327.24	3.29799	33291.7	610.329	161733	239629	2491.64	90374.6	380.269	50.869	3316.46	28.404	1083.58	125.154
1329.62	4.47451	33951.3	607.668	156496	243823	2669.46	90285.8	426.027	56.228	3178.68	17.4808	1105.29	147.658
1332.01	2.60235	33021.2	657.298	149229	251945	2334.73	89222.3	404.472	52.3438	2957.5	22.6804	929.52	102.383
1334.39	4.22458	32855.6	703.482	149523	251719	2393.33	89584.9	328.73	56.9373	2601.09	24.6922	964.079	127.728
1336.77	4.50767	32818.4	624.682	158581	245996	2518.02	85496	513.296	53.0129	3051.37	15.2915	946.091	156.198
1339.16	1.10792	32946.8	620.818	157439	250451	2358.36	80710.1	443.07	51.6148	2733.68	19.6058	869.162	127.781
1341.54	3.15893	31103	697.835	150466	254412	2480.71	85375.5	477.79	50.1996	2888.63	19.6409	977.698	124.43
1343.92	3.5052	34497.6	706.159	162698	238368	2419.65	90058.6	462.903	55.8221	2949.13	22.2145	1020.23	149.657
1346.3	2.46699	32693.3	594.932	144356	259454	2299.41	84969.4	421.192	54.9953	2623.94	18.806	977.976	126.641
1348.69	4.71341	33750.5	587.605	159098	241890	2629.61	90163.5	470.356	50.7742	3105.84	25.2973	906.521	143.047
1351.07	3.97225	30629.8	584.712	139241	268538	2191.79	80209.7	450.075	44.0672	2508.57	19.5461	926.574	116.728
1353.45	4.21858	31049.2	610.457	161348	238119	2508.44	95997.4	376.635	50.8425	2754.23	20.4044	955.779	106.432
1355.84	2.02985	32737.8	692.689	145418	246883	2297.1	102335	434.139	55.9578	2939.14	20.7282	936.281	117.04
1358.22	3.34781	33054.8	623.643	157483	243258	2488.08	91025.4	382.478	44.6206	3130.79	27.2369	968.584	157.511
1360.6	2.37658	31916.5	653.754	146996	251763	2426.96	93326.5	452.198	39.7511	3037	26.4194	981.045	118.677
1362.98	3.30755	32179.6	689.357	160393	241556	2297.08	90917.8	384.791	39.0892	2775.72	21.3431	1041.02	135.888
1365.37	2.70785	33699.3	682.752	140486	258614	2240.14	90415.6	326.355	52.7406	2826.2	21.4748	937.107	130.562
1367.75	2.58605	34987.9	548.964	151918	245220	2440.35	93890.5	444.849	50.4653	2962.33	21.2464	997.89	125.98
1370.13	3.05663	37265.1	579.879	160466	238187	2303.97	91068.2	342.819	38.2796	3023.47	22.7571	996.016	119.802
1372.52	7.37734	32131.3	612.156	153475	243832	2823.89	96212	390.295	40.6734	3006.04	18.4449	1075.81	135.31
1374.9	5.49984	33869.2	548.389	146284	248984	2331.85	97284	454.941	47.0225	2573.16	17.2195	957.469	143.179
1377.28	3.05514	32820.1	521.02	151360	249426	2500.48	89971.1	323.982	54.537	3456.11	25.0156	988.101	129.866
1379.66	1.81405	34791.3	611.435	156301	248133	2703.69	83730.6	440.032	42.754	2702.27	18.9731	913.2	129.166
1382.05	4.53322	31494.4	599.284	151593	245284	2466.54	97926.7	356.655	44.1802	2696.17	21.2384	909.058	145.568
1384.43	2.20278	32666.7	638.626	166555	230827	2471.82	98524.6	283.781	53.5732	2909.26	19.224	940.724	124.745
1386.81	4.94188	33846.8	600.255	147451	248366	2685.46	95542.9	434.685	54.1786	3339.19	26.1795	1042.7	141.674
1389.2	2.61601	33747.7	626.818	141082	262922	2464.8	82820.8	383.093	48.8477	2774.53	23.9251	969.755	109.78
1391.58	2.47834	33189.2	721.245	151752	245474	2678.22	95084	385.247	53.7721	2996.68	21.745	1004.2	121.255
1393.96	1.12519	34549.4	584.662	149306	250288	2580.22	90301.9	445.936	47.5146	2615.97	17.8941	925.377	141.299
1396.34	1.90725	33544.5	549.868	156426	233934	2409.86	106140	405.985	45.0249	3418.02	24.6741	951.687	130.504
1398.73	1.59424	31021	503.909	141502	257649	2513.83	92671.1	437.77	34.9353	3141.44	23.5885	944.67	119.494
1401.11	2.81325	32717.7	702.604	159951	235427	2633.08	99591.9	444.496	58.7711	3288.76	26.499	919.681	147.573
1403.49	3.13455	33664.5	641.967	154890	244523	2863.56	91663.5	393.63	45.055	3053.01	22.9924	1034.97	160.53
1405.88	6.13585	32270.3	619.187	155009	243354	2344.85	95188.9	287.094	47.0732	3150.26	26.842	1006.57	122.561
1408.26	3.58855	31576	611.184	149958	245593	2380.47	99053.8	458.984	41.6457	3028.82	22.4247	1106.28	141.879
1410.64	3.36008	33128.1	588.4	148732	253289	2413.96	88175.9	414.42	40.6327	2447.82	25.0471	948.917	128.424
1413.02	4.15914	37928.4	621.752	152565	248787	2673.17	84704	489.969	38.892	2681.6	21.5652	934.686	130.499
1415.41	2.93543	31848.3	716.326	145627	253342	2500.23	93199.4	378.476	43.7883	2586.38	21.3485	925.112	169.454
1417.79	3.64885	35328.2	721.703	165869	233968	2494.3	91375.6	437.652	55.7241	3191.01	17.3505	1102.23	135.287
1420.17	3.90776	29513.4	545.071	141824	264043	2389.32	84862.3	321.576	40.114	2368.45	18.9464	892.166	116.536
1422.56	3.43863	31301.8	664.888	145207	260136	2482.19	84130.7	429.757	43.9022	2444.57	20.4989	879.078	117.584
1424.94	2.96685	32679.4	545.678	159293	239810	2589.29	94088	485.53	48.5342	3146.15	23.621	973.763	146.099
1427.32	1.17547	34005.5	817.695	151673	241130	2585.97	100872	375.981	41.2581	3201.29	21.8304	970.434	125.681
1429.7	2.61965	33213.2	644.118	160133	239478	2576.9	92846.8	381.473	42.8667	3163.14	25.4413	1101.54	144.734
1432.09	3.81917	35612.1	596.115	154252	241642	2731.91	95803.5	513.024	53.1348	2433.96	25.8435	879.678	116.442
1434.47	6.7652	34485.1	597.313	150205	250824	2330.98	88695.2	331.738	48.4773	2578.61	16.7755	921.95	140.35
1436.85	1.72095	34192.2	628.989	176367	226526	2542.97	90103.8	446.195	48.4729	2857.49	20.3979	1030.9	135.253
1439.24	2.58682	30157.8	695.636	152313	248214	2394.64	92839.8	360.736	49.025	3560.7	18.3172	1010.16	128.218
1441.62	2.15799	30001	498.173	115584	288375	1983.82	82949.4	379.844	33.3705	2491.61	20.341	796.962	98.5302
1444	2.4272	33892.5	654.649	163969	236361	2269.21	92399.6	417.299	48.2052	2860.26	18.5312	941.289	149.358
1446.38	3.88879	33342.6	500.522	151247	248620	2261.38	91860.5	392.264	45.9397	2578.89	18.1551	953.895	115.438
1448.77	3.15181	32809.7	635.714	155375	242569	2587.14	95231.6	446.921	51.4165	2916.32	19.6589	935.648	132.95
1451.15	4.83313	37351.3	638.297	159130	238847	2511.02	91269.1	422.535	53.5842	3240.83	24.9997	916.626	140.272
1453.53	5.2494	33114	627.185	153553	249657	2556.14	86760.4	343.273	43.5332	2811.25	16.2386	1024.31	120.322
1455.92	2.43399	35790.1	572.409	154453	243148	2366.45	93081.8	469.234	62.656	2690.33	23.3123	1022.11	129.722
1458.3	1.6865	33546.2	739.707	160637	245311	2269.72	83086.1	546.743	44.2958	3030.78	21.2047	995.791	156.124
1460.68	4.63284	34908.9	629.848	153927	240577	2537.05	98274.5	524.411	50.7602	2785.27	20.9226	944.199	136.78
1463.06	3.55126	31696.7	708.679	155802	242426	2419.85	95863.9	463.598	53.891	3031.71	23.0094	941.571	135.32
1465.44	2.65803	30648.4	765.428	156825	242755	2575.71	94552.3	435.255	52.6851	3262.07	24.3134	1022.53	123.173
1467.83	3.04528	33570.8	612.126	146427	257331	2325.19	84573.8	480.744	46.7374	2551.87	22.9796	920.893	132.487
1470.21	2.12199	34711	615.174	161252	233271	2582.47	99286.2	477.197	37.0139	3277.1	23.3904	1005.29	140.03
1472.6	1.38788	32049.1	550.71	152413	248597	2629.71	91048.3	438.383	42.9007	2695.85	15.5432	926.957	129.576
1474.98	0.883892	34416	570.572	136692	261319	2504.77	90486.4	375.632	44.7974	2953.06	19.3083	895.865	132.938
1477.36	5.8251	32025	587.708	155113	249589	2604.82	85838.8	383.405	58.2682	2772.11	25.2264	937.6	135.268
1479.74	7.69515	36791.1	690.68	150992	239288	2497.63	102524	428.744	45.2933	2754.59	22.6018	897.635	155.28
1482.12	3.4282	31274.7	761.516	153655	243976	2389.45	96360.4	458.466	52.7053	3530.35	24.8097	898.496	120.159
1484.51	2.37671	33813.4	671.671	157942	240533	2946.29	93868.7	448.211	50.6286	2579.66	19.7354	942.01	126.163
1486.89	3.82629	34272.6	567.475	148930	249606	2697.46	91888	375.245	40.7028	2843.35	22.1004	947.852	147.898
1489.28	1.75719	31137	580.16	159102	242336	2192.72	92771.7	417.959	35.8036	2751	20.4281	944.237	126.452
1491.66	5.97091	33159.4	576.692	155911	244254	2230.8	92105.7	388.506	42.1452	2868.65	24.4998	917.731	125.011
1494.04	4.60659	34292.3	623.241	164412	239009	2292.63	87236.7	400.715	49.27	3034.1	20.2446	971.074	120.964
1496.42	3.62759	37747.6	665.169	162715	230083	2597.31	99269.8	442.801	54.6441	3183.34	15.2242	1033.47	152.6
1498.8	5.55158	35961.7	700.185	151047	243351	2623.19	97025	420.722	49.4478	2566.13	24.6909	983.24	155.066
1501.19	4.41766	31275.1	613.669	151029	248065	2491.69	94069.9	478.155	48.8756	3089.91	26.799	948.54	130.651
1503.57	2.72971	32367.2	529.741	157141	247773	2299.82	86173.5	489.845	44.684	2315.51	23.5206	972.524	118.318
1505.96	5.14745	38031	570.574	155110	236761	2344	99846.5	412.325	49.6997	2789.8	19.5725	978.73	132.306
1508.34	3.2112	35078.9	614.282	149286	246392	2707.57	95171.1	442.485	50.0573	3056.01	21.2379	967.625	161.951
1510.72	2.69232	34000.1	639.537	154405	247545	2368.02	87982.9	402.442	50.0675	2910.38	22.6193	1002.02	119.112
1513.1	3.10922	39293.6	584.277	147959	246089	2657.51	93522.4	397.855	61.7183	3083.35	24.5149	942.195	108.168
1515.48	7.52426	31149.8	674.494	152335	253246	2289.39	85521.3	386.868	54.731	2190.95	25.7278	987.032	106.518
1517.87	3.4451	37423.4	639.805	157900	237322	2452.98	95277	458.83	44.221	3119.08	26.4534	970.033	135.452
1520.25	4.21456	34069.3	619.61	152539	247145	2457.07	90942.2	427.151	48.7303	2966.57	18.7122	949.428	141.64
1522.64	2.89579	35071.3	634.957	159879	241701	2521.68	88702.7	368.715	38.8719	2674.18	23.8965	908.185	132.328
1525.02	6.76473	32693.4	669.782	154019	245466	2334.35	92179.4	461.642	44.3251	3639.12	23.0137	992.196	146.326
1527.4	1.8062	30712.3	533.037	148247	257733	2238	84324.4	360.444	46.3326	2804.13	22.1731	936.593	133.491
1529.78	4.55817	30948.6	650.38	147061	254939	2237.37	89471.7	447.793	47.4759	2974.39	25.6522	1039.86	137.125
1532.16	3.78132	36034.4	592.37	140947	247531	2367.47	104462	412.124	50.2327	2710.6	22.8197	964.997	135.649
1534.55	2.70873	33357.4	633.594	151599	244550	2698.08	96269.9	369.013	46.3035	3360.87	15.4749	1072.12	118.522
1536.93	6.60823	29593.8	573.859	136534	257966	2435.94	99819.7	426.75	49.268	3538.33	22.7457	1002.67	137.953
1539.32	1.6769	30849.4	528.473	140395	257569	2246.8	95181.5	420.227	42.0977	2574.95	18.2155	951.222	129.695
1541.7	7.24754	33947.3	797.949	166540	232119	2787.34	94479.1	395.101	48.7904	3037.46	19.1733	1097.88	135.606
1544.08	4.1135	33719.2	537.86	157195	249383	2370.57	82172	379.948	45.432	2657.31	16.5315	857.772	132.633
1546.46	2.37981	32447.4	608.412	149052	256160	2626.96	83599.7	376.845	44.2648	2654.48	22.5835	1017.03	130.413
1548.84	9.26008	36852.8	603.386	163852	230191	2758.11	98516	404.732	50.5081	2975.96	17.6078	1135.48	145.112
1551.23	5.37067	29179.9	531.308	135044	271744	2092.97	82671.3	352.964	51.1155	2473.43	15.7986	901.294	134.135
1553.61	2.71143	30763.8	610.754	145624	259945	2285.09	84377.6	362.721	37.812	2772.36	25.792	893.455	119.273
1555.99	4.62037	31732.2	601.725	147787	250572	2361.47	94163.5	410.77	52.9291	3263.94	19.8783	1014.07	137.711
1558.38	4.67193	33839.8	619.759	156288	244196	2559.67	89230	431.553	49.6778	4219.79	21.2339	1099.61	144.701
1560.76	4.67015	31456.6	677.839	154090	247678	2525.29	90420.9	395.351	42.7966	2993.03	26.3074	956.392	148.772
1563.14	4.49365	33165	607.997	157937	242605	2422.65	91501.4	371.859	54.0133	2949.22	22.6565	1035.03	151.304
1565.52	4.8427	30318	586.412	153453	245501	2330.85	96069.4	416.608	45.1807	2921.53	19.6436	933.808	120.234
1567.91	2.757	32968.9	577.017	152146	250434	2372.51	87615	352.453	43.6374	3025.25	21.7475	1020.33	132.4
1570.29	7.00822	34829.9	618.397	159320	239113	2424.32	93165.1	441.302	44.4445	3129.31	30.5909	981.783	132.777
1572.67	2.37664	29731.5	667.767	159087	237768	2553.97	100314	459.473	47.6956	3094.54	22.9522	971.063	124.652
1575.06	2.92565	35003	608.322	153989	232459	2301.81	110703	407.48	56.6054	2969.91	22.3854	952.821	131.115
1577.44	5.57219	33623.2	548.043	158227	246027	2442.73	85363.8	439.519	40.2165	3006.04	27.7861	1046.21	140.887
1579.82	2.15778	34041.8	507.313	143444	259613	2373.17	84106.8	492.542	48.9154	3206.79	22.9583	941.303	132.025
1582.2	3.43155	34259.3	664.388	147826	251529	2720.65	90287.1	392.531	46.1047	2802.08	18.6467	1014.12	135.391
1584.59	6.51428	33535.4	616.748	155016	247781	2416.7	87340.4	327.064	54.7777	3001.81	20.7489	889.349	95.1033
1586.97	6.62865	34397.9	542.543	162288	240659	2620.43	87170	397.962	50.2104	3055.48	18.1622	1062.28	156.511
1589.35	4.63336	33459.2	697.098	163658	234638	2703.85	95159.8	463.744	46.1503	3029.77	20.0647	1032.06	144.095
1591.74	1.76985	31829.3	606.491	163695	238286	2388.94	91626.6	466.397	54.335	2897.71	22.5776	1004.47	131.628
1594.12	4.13627	39664	699.562	154980	239902	2312.24	93027.7	406.919	48.1433	3391.1	21.3031	937.393	109.815
1596.5	3.12608	35768.1	638.776	146782	248238	2526.79	95498.8	414.717	53.5086	2814.22	26.9244	930.333	126.406
1598.88	6.05631	31564.1	614.815	140476	262441	2358.07	86566.9	456.313	47.1456	2660.52	15.1015	991.841	134.567
1601.27	4.28645	34774.3	665.017	138776	263047	2464.02	84563.6	368.24	41.8754	2943.15	18.7196	984.566	116.053
1603.65	2.26071	30822.5	601.118	148834	257364	2313.52	83902.2	406.531	55.745	2628.37	19.2975	991.812	126.446
1606.03	4.7703	31185.9	600.875	144599	253779	2451.4	94215.5	407.133	47.5511	3003.35	22.8728	1080.87	124.313
1608.42	4.65126	28662.4	660.349	154949	249681	2447.99	89266.1	419.891	40.4684	2730.75	26.2387	893.009	123.406
1610.8	4.31061	37468.2	651.851	152445	242964	2725.75	94109.3	396.785	47.5763	2779.72	22.6039	957.379	151.204
1613.18	5.91802	26648.8	578.188	151696	256921	2114.65	85009.9	382.867	38.3477	2671.03	20.2148	889.619	137.846
1615.56	6.77606	35067.4	746.216	152691	241259	2585.24	98358.2	421.716	45.2406	3058.52	21.5841	1047	132.166
1617.95	4.89809	34319.6	606.509	138960	263130	2387.89	84992.1	398.634	51.9776	2719.2	17.6462	907.454	108.703
1620.33	3.71541	32821.8	587.65	144006	264089	2307	78290.6	498.813	51.9116	2498.79	15.3346	941.202	127.217
1622.71	4.33446	35163.5	618.036	162872	236072	2645.97	92520	396.349	37.2347	3199.25	21.1758	971.457	137.671
1625.1	5.69913	32813.7	701.063	156445	234826	2618.68	105227	444.943	39.1174	3172.07	28.0878	995.392	142.058
1627.48	6.31477	34404.6	544.848	151459	238407	2865.19	105270	458.909	84.2624	2706.08	21.6262	1033.62	137.121
1629.86	6.70279	34720.3	640.505	156019	240941	2409.61	95207	411.323	42.3432	2830.69	25.2842	1041.99	106.84
1632.24	4.02524	33209.1	617.385	158044	242449	2562.29	91522.6	435.413	49.2025	2789.42	17.4999	1045.36	116.003
1634.63	2.49244	32893	657.829	159543	241810	2472.14	89908.8	465.628	43.3043	3706.39	18.2363	1057.82	138.207
1637.01	3.56197	34671.7	752.667	161870	235332	2395.92	95656.8	475.387	45.9892	2964.25	23.955	972.692	123.849
1639.39	8.46911	31544.2	545.318	146014	251485	2549.77	95763.5	414.453	50.1565	2663.27	17.8252	1087.56	98.6161
1641.78	6.65382	33895.7	700.11	158695	238468	2741.43	95861.6	376.395	42.901	2877.75	20.1425	968.675	126.318
1644.16	4.81977	33064.3	671.479	155670	246618	2878.15	87681.6	491.272	53.3847	3200.38	24.9942	1060.26	124.245
1646.54	4.79023	32680.2	628.991	151683	245009	2618.17	96816.9	408.189	59.6296	2735.86	24.7607	909.261	125.802
1648.92	3.95371	32650	619.68	170496	243034	2165.06	74729.3	383.549	46.9385	2975.41	19.3181	864.05	123.204
1651.31	5.62705	32067.7	572.541	158524	240666	2517.21	94520.6	541.843	60.2884	2926.29	15.648	1006.37	167.307
1653.69	5.9627	34450.6	625.292	161180	241355	2550.28	86986.4	526.357	51.6894	3534.11	19.3843	1019.9	117.07
1656.07	7.81838	32070.3	571.461	154819	240256	2531.06	100254	431.835	46.6771	2932.19	16.5376	1041.38	151.37
1658.46	6.63679	34206.9	735.599	159917	237285	2583.87	95230.5	502.553	38.5965	3284.5	21.5545	1012.75	157.317
1660.84	1.27652	29548.9	550.977	150614	234979	2431.45	116557	448.391	44.4899	3052.63	20.649	891.585	135.267
1663.22	5.95915	34664.5	736.849	152407	246202	2487.73	91753.9	342.197	44.6758	3134.56	27.4709	973.156	128.126
1665.6	3.58889	33119.7	656.462	145790	255120	2242.61	89548.1	414.679	44.336	2370.86	20.3372	884.838	129.46
1667.99	5.84768	36151	580.742	149244	250237	2642.6	88708.7	439.849	52.8516	2644.46	25.7302	1088.44	124.558
1670.37	7.81281	36139.9	518.573	151322	249009	2619.52	87922.8	347.592	44.2314	2903.93	24.9368	906.551	115.609
1672.75	3.2355	26413.5	375.676	110518	306249	1905.34	66591.5	356.769	34.4862	2011.12	21.6711	783.385	116.789
1675.14	5.15242	33592.8	736.505	152165	244350	2850.75	95225.9	404.002	45.6399	3434.53	31.1204	1015.1	152.605
1677.52	4.32936	32916.1	653.798	157130	240783	2461.39	95798.6	385.708	45.939	2629.06	26.2729	1063.07	138.665
1679.9	8.54162	32552.7	634.88	158120	241285	2369.33	93748.8	413.349	42.6215	3085.61	31.0978	970.431	157.094
1682.28	7.98888	33174.1	655.188	157956	242727	2454.81	91115.4	444.062	58.3655	2939.65	26.445	1030.15	145.223
1684.67	4.12068	36943.4	661.186	143665	253305	2635.39	90562.1	481.145	41.63	2904.45	23.1536	940.762	111.391
1687.05	5.88454	37697.7	661.841	138639	255201	2436.25	93714.2	431.956	51.7876	3095	19.5	978.195	139.761
1689.43	5.80348	31782.9	561.824	157004	235530	2568.46	104306	403.073	51.0071	3494.83	20.3834	1058.91	123.331
1691.82	7.68669	35752.4	693.718	161094	239374	2350.36	89397	403.469	63.435	3204.57	24.9154	987.595	153.589
1694.2	8.35926	31524.2	567.53	167143	236256	2333.81	90503	350.348	54.0114	2990.93	21.0242	991.652	150.015
1696.58	4.1037	29998.6	667.077	146104	257321	2357.85	88305.2	357.967	41.6921	2698.2	24.5515	1001.41	149.821
1698.96	7.60529	34640.2	628.257	148365	253718	2206.39	86366.5	425.502	41.2282	2794.99	19.2896	925.321	141.788
1701.35	9.54978	34861.8	615.298	154501	245284	2489.82	90505.5	411.819	60.3297	2737.61	26.4518	1021.82	125.587
1703.73	7.66361	36491.5	701.29	150427	240735	2523.95	101201	445.633	49.024	2715.86	25.6645	1081.75	130.316
1706.11	8.44938	33957	689.963	156449	246800	2394.35	86553.5	462.507	39.6471	2604.85	25.4287	947.946	143.148
1708.5	5.31045	31985.7	607.017	144299	256605	2283.53	89834.6	374.873	40.8376	3017.32	21.4259	923.081	119.792
1710.88	7.16237	28443.5	545.71	158248	243087	2288.71	95550.7	408.596	55.0368	2526.76	20.167	921.1	113.231
1713.26	6.12915	33134.1	698.752	153628	244970	2869.55	92612.8	473.371	44.2087	3506.81	17.895	1046.4	147.737
1715.64	7.50417	30246.4	574.798	153511	251702	2578.96	86429.8	413.718	51.2414	2768.17	23.9597	1008.78	139.417
1718.03	5.97602	34109.2	651.035	156289	242036	2363.12	94058.1	401.612	51.6982	2614.74	20.2292	902.825	171.669
1720.41	10.702	31723.7	665.821	162595	238696	2470.77	92380.2	519.158	40.1479	2857.47	22.1712	1048.07	136.698
1722.79	4.10739	30777.7	660.206	162691	240933	2330.72	90198.8	366.622	43.0472	2729.1	22.7404	1030.93	126.479
1725.18	8.36265	34116.4	645.899	164401	233074	2414.87	96518.2	507.394	46.7007	2676.48	19.0009	1005.64	140.147
1727.56	7.38755	29251.9	574.698	149625	249603	2431.59	96142	381.698	43.8931	2716.75	19.4932	965.002	94.9014
1729.94	8.04819	36531.6	665.581	158305	233294	2557.54	101431	492.969	44.1227	3222.32	19.4058	1050.79	126.955
1732.32	4.74969	34446.6	601.253	152734	244203	2334.35	95388.2	537.994	54.2552	2421.37	21.7602	867.038	119.838
1734.71	8.62461	40079.2	548.025	150415	237587	2510.32	102674	407.172	51.566	2934.6	19.2021	1014.92	125.77
1737.09	8.33332	32249.4	517.494	144090	258429	2534.2	86811.2	419.706	48.8575	2996.64	16.1656	1054.32	120.432
1739.47	9.38664	36201.3	745.674	171893	228039	2789.93	91091.9	409.788	43.3287	3317.53	26.21	1103.43	135.664
1741.86	9.84157	33177.6	590.947	150047	247036	2465.7	95647.5	465.567	50.5396	2535.29	24.3145	997.651	149.939
1744.24	8.00769	29614.2	554.392	132031	237706	2118.21	138341	338.339	42.7267	2562.98	18.4516	820.746	106.806
1746.62	7.9054	36208.2	496.616	153121	243356	2586.45	93458.6	454.18	38.613	3376.67	19.6699	1010.75	149.218
1749	9.31471	34027	562.01	146596	252606	2317.14	91073.9	435.091	45.8359	2761.87	22.8162	892.703	129.407
1751.39	11.232	32083.9	703.082	160872	239012	2526.69	93822.3	408.393	47.4394	3011.41	17.8113	996.526	127.658
1753.77	9.73724	31423.7	547.96	147198	251794	2271.14	94060.1	342.088	41.653	2853.5	18.9278	939.191	131.791
1756.15	10.6625	32055.2	571.692	154693	247723	2620.69	88858.2	491.68	50.1693	3045.87	18.8169	948.222	125.485
1758.54	10.724	30243.9	637.83	143628	253803	2234.62	96926.1	525.729	39.7376	2560.39	20.6882	942.042	120.796
1760.92	13.0412	35345.1	591.584	154656	242176	2375.39	94473.2	435.773	45.1827	2999.56	18.2591	992.187	136.736
1763.3	8.54429	35095.2	579.431	159907	242933	2481.32	86400.8	507.073	47.7364	2880.51	20.0336	1027.77	118.05
1765.68	7.69328	39653.2	658.067	153045	236097	2525.08	100607	513.407	62.9815	3747.3	22.9294	1189.86	158.491
1768.07	9.67831	32844.3	615.399	156369	243664	2570.22	92022.7	368.127	45.704	3010.96	22.5723	1127.15	175.246
1770.45	8.5364	30975.1	541.988	167003	240058	2392.71	85569.4	490.055	49.0175	2655.06	18.4644	967.355	134.236
1772.83	10.8833	27535.7	512.293	143092	266394	2065.85	81631.9	373.884	48.1386	2455.01	24.2326	874.823	112.058
1775.22	7.4742	33528.7	554.786	148810	251154	2655.79	90166.8	490.917	60.3091	2903.94	28.9656	1014.91	152.185
1777.6	6.17975	28581.1	697.377	140350	265685	2224.94	84673.2	384.209	39.783	2806.16	18.1947	945.051	121.866
1779.98	10.3545	34377.4	580.253	144039	251762	2823.38	94802.9	395.654	47.6891	2907.7	19.3904	1009.9	172.255
1782.36	9.0603	34688.9	685.109	160740	237322	2765.01	93685.7	553.205	53.1972	3016.98	22.815	998.721	151.816
1784.75	9.23725	34411.2	602.325	150029	240432	2397.25	104193	376.214	41.5602	3118.01	26.1917	1020.48	141.625
1787.13	8.49862	34523.5	591.663	143899	252761	2183.65	93947.9	390.253	46.0101	2921.52	16.7046	937.276	141.677
1789.51	10.1772	33260.6	600.268	146361	259435	2563.53	81162.9	417.549	52.8875	2950.55	27.4536	994.624	151.336
1791.9	7.62794	31489.5	614.573	151227	248296	2454.27	93396.8	400.219	44.9698	3022.04	19.7648	979.72	145.733
1794.28	6.52313	36586.7	593.104	150295	244871	2459.88	95235.6	391.722	49.8004	2845.07	20.1013	912.007	137.206
1796.66	8.22903	32861.4	509.607	145772	259365	2620.28	82256.3	575.92	36.5523	3013.16	17.9588	1042.94	142.058
1799.04	7.87885	29792.3	624.176	156108	250289	2232.56	85967.4	402.353	41.6481	2674.17	18.8351	924.691	111.123
1801.43	9.1094	31988.8	628.168	141884	263296	2345.22	82247.5	380.75	37.6427	3418.9	22.143	1072.53	160.355
1803.81	13.3429	36494.5	624.088	146396	249459	2337.49	93338.3	355.428	43.8664	3172.33	22.9809	974.879	122.223
1806.19	8.03694	34117.2	498.831	137492	265214	2407.53	84036.9	359.474	44.1151	2779.61	21.6131	948.334	124.211
1808.58	9.22726	33528.1	590.569	170929	237409	2392.06	81868.9	369.281	44.124	2801.39	20.8666	915.644	117.35
1810.96	8.88788	32791.3	649.265	153089	247888	2118.2	90536.6	390.286	52.2362	3001.49	17.6706	978.049	131.916
1813.34	10.7724	31345.1	569.108	157531	247800	2271.26	86134.8	452.072	53.1304	2833.7	24.0567	942.653	126.985
1815.72	8.7265	29191.7	514.988	138196	270991	2100.75	79490	382.698	38.9792	2559.77	21.6694	872.202	118.248
1818.11	15.2796	36606	573.655	159463	238295	2505.96	92599.2	452.594	55.7227	3016.51	23.234	964.7	111.386
1820.49	9.85167	31073.6	607.236	137212	262109	2250.93	91580.9	356.125	31.2756	3374.62	21.1634	936.031	119.928
1822.87	10.7659	33497.1	501.721	143570	251233	2297.95	98046.9	414.723	51.7248	2465.29	19.5271	1022.7	121.215
1825.26	11.1862	37530.5	581.328	152468	234215	2481.24	107274	418.797	48.1648	3240.29	18.4982	927.363	129.298
1827.64	11.5003	38234.6	626.998	154532	245061	2499.57	87353.9	485.337	45.5739	2855.19	22.3454	1006.51	140.168
1830.02	11.833	37030.1	712.508	146027	249781	2313.75	93204.9	369.717	48.5105	2716.99	21.5818	897.012	129.612
1832.4	10.6391	31969.5	580.55	151560	248738	2407.81	92283.6	378.71	29.5265	2629.33	22.6146	974.939	149.831
1834.79	8.24437	35812.1	705.028	142658	252707	2358.36	93966.6	381.441	35.7295	3102.81	17.9702	1035.55	117.402
1837.17	11.3864	31229	630.204	144914	251984	2433.14	96772.3	359.985	49.2916	2858.6	14.6951	935.776	135.437
1839.55	8.83925	33809.6	543.034	150967	242634	2859.82	99632.8	385.363	39.6079	3409.15	17.6702	920.114	133.171
1841.94	12.9097	34375.5	655.045	151028	250111	2275.4	88394.1	454.198	46.0946	2750.95	23.4481	981.544	137.939
1844.32	9.90508	31796.1	613.379	163225	239898	2518.07	89493.5	358.174	43.89	3394.02	16.0681	871.658	137.773
1846.7	13.3717	33912.9	668.95	146452	247640	2413.12	98791	391.965	48.8124	2643.21	24.9199	1063.94	100.478
1849.08	10.8872	35221.7	555.385	162538	236901	2581.06	92098.6	361.766	34.8935	2825.31	19.0824	1041.23	135.47
1851.47	11.611	32546	661.769	145262	257650	2650.56	86164.1	333.967	44.2916	2902.64	22.4867	891.838	143.306
1853.85	13.2175	33097.2	650.573	153993	241300	2299.24	98911.9	351.463	41.904	3035.98	25.7171	1018.93	133.461
1856.23	11.8134	31718.7	622.929	155885	240702	2189.85	98780.5	437.679	46.8069	2930.08	15.7202	964.948	123.618
1858.62	13.984	35665.7	505.928	150358	249998	2522.65	87917.7	411.399	44.3503	3017.45	26.0689	1088.08	122.401
1861	11.8863	35197.8	689.124	156875	237208	2498.99	98564.6	482.43	56.1934	3295.5	25.1587	1082.51	147.674
1863.38	12.6633	30657.9	612.749	159877	238870	2550.91	97551.8	339.945	45.2825	2382.6	25.1653	925.928	131.912
1865.76	9.50359	32615.6	534.688	157273	245167	2548.7	89365.7	403.614	50.9788	2609.18	21.1503	936.07	123.942
1868.14	9.8264	33132.3	552.4	174841	231101	2376.24	87123	397.255	38.6712	2227.15	23.8809	974.152	111.93
1870.53	11.1546	36020.5	597.951	154745	245399	2165.1	89425.7	314.406	39.2868	2801.21	34.6002	814.973	127.888
1872.91	18.2106	32358.5	474.774	151701	242965	2225	101077	374.882	42.037	2487.23	23.9261	860.674	98.6946
1875.3	22.0113	29399.9	483.45	151503	251715	2117.52	90971.7	342.393	38.3885	2323.42	25.2678	993.636	97.2315
1877.68	17.9221	28823.7	537.765	163778	231066	1953.55	107327	265.026	38.6728	1950.72	24.2894	657.301	94.987
1880.06	39.4868	28405.9	473.028	156040	241534	1922.3	102057	263.468	34.7387	2129.02	29.839	688.23	92.5469
1882.44	35.1949	27076.4	562.189	158565	242907	1410.19	98611.8	212.863	28.7829	1826.59	22.0176	598.892	75.2807
1884.82	42.8529	26654.7	396.126	164005	227261	1669.4	115086	203.58	47.8894	2346.86	23.2559	577.042	77.5764
1887.21	52.2546	31199.2	353.933	169700	224575	1051.02	108374	199.141	34.88	1666.79	28.8977	524.416	78.7008
1889.59	63.5083	24154.8	289.984	157516	237199	1097.14	112600	219.283	31.9838	1534.43	22.7777	352.85	54.6985
1891.98	63.6559	21344.6	157.833	176470	223733	1103.79	110714	161.158	30.0916	1342.26	27.4241	337.271	46.8264
1894.36	76.7292	22904.5	242.644	175796	225962	1103.82	106873	106.077	28.3249	1123.09	22.1553	338.321	38.0353
1896.74	84.9359	23560	170.37	168352	231459	835.881	108478	113.917	22.6634	909.583	28.3909	231.79	27.4404
1899.12	85.0796	23994.6	145.106	171570	225320	621.101	112900	54.9847	16.7559	1462.1	33.267	188.876	46.1747
1901.5	78.5672	18833	316.654	178942	215456	589.235	123120	84.9685	17.7131	1153.24	18.774	179.245	21.9587
1903.89	79.4001	18353.3	175.12	168486	229750	514.899	116088	92.2661	34.9878	1165.5	22.6713	130.304	10.0097
1906.27	89.052	18914.3	177.685	188325	210729	389.522	117976	32.8596	32.104	1195.93	30.6587	128.143	4.16437
1908.66	70.9762	17379.5	65.2121	171819	233916	352.248	106826	58.3682	27.7675	792.89	21.9451	118.042	27.3414
1911.04	81.4635	20806.7	117.753	175174	231941	463.773	101861	39.4159	50.3091	765.623	17.1777	137.303	20.5446
1913.42	87.0196	17525.9	84.1165	172001	225609	377.226	119288	11.2105	28.038	622.714	33.7789	114.931	14.909
1915.8	82.8397	17584.2	99.235	163616	234255	278.284	116845	44.5268	21.9688	1229.32	21.0974	102.307	5.8311
1918.18	92.5965	18470.9	91.4842	175867	225602	386.756	112969	51.3296	17.6186	807.334	27.0269	88.6174	6.02775
1920.57	94.8273	17570.6	130.606	167594	224176	285.941	127258	23.7833	18.157	841.897	23.1061	56.3559	5.79579
1922.95	67.5305	18416.1	69.9041	173888	230378	224.146	108947	8.87026	12.6466	520.415	18.9769	63.6462	1.44366
1925.34	80.1526	17347.1	108.033	170855	233829	174.733	108816	4.16063	21.4902	476.191	18.2233	53.9717	7.87875
1927.72	92.881	17108.7	77.5525	166397	221482	214.608	133496	28.9892	7.59879	894.142	20.2988	73.5053	20.6091
1930.1	110.956	16755.6	-60.6559	167591	232984	169.196	115354	25.7626	28.9339	304.94	32.7976	63.8767	-3.29287
1932.48	97.8514	14818.6	70.9416	160659	239396	193.659	116397	3.29576	30.3367	569.725	29.8378	56.4703	15.8889
1934.86	100.348	19273.5	95.849	179411	215075	245.448	123912	-1.92241	14.4611	575.873	31.416	47.6353	15.5582
1937.25	88.1075	17202.9	48.0453	166777	232480	216.09	116130	46.8591	1.12749	909.237	22.1937	40.0267	3.03254
1939.63	91.5207	18293.8	110.884	185029	204680	179.597	132998	-7.32744	21.9738	827.034	26.1561	50.9379	1.48231
1942.02	108.18	16053.1	71.0581	176093	218951	291.519	125400	-8.6831	22.8267	756.314	23.8458	48.6231	-0.0866969
1944.4	112.672	19085.8	69.0205	173380	221957	167.867	121862	-16.3474	33.71	520.351	23.5549	48.9129	3.22598
1946.78	87.6809	14466.7	-13.6842	183147	211657	197.806	128768	8.73182	14.5502	749.671	18.6559	43.4186	2.96308
1949.16	94.3338	15919.8	30.2664	156748	244640	192.685	112790	11.3356	24.1454	459.173	14.1685	42.0628	-0.0771213
1951.54	81.9163	14773.4	-24.0807	159514	234607	155.442	125603	-1.77063	24.8538	482.445	21.8107	44.7503	-4.5252
1953.93	103.507	19682.9	82.5651	171216	225485	167.796	118891	25.3756	14.1724	405.57	16.2142	49.4365	3.0686
1956.31	106.844	17551.5	-75.3028	196681	211491	291.716	107446	3.51319	4.9623	1071.71	25.7029	45.072	3.40276
1958.69	111.292	17513.1	-8.26057	190871	210590	120.018	117026	4.86225	9.24939	779.791	24.2469	43.9123	12.3089
1961.08	90.2847	16208.5	25.378	165714	230402	175.83	121827	-1.84595	5.41262	902.474	20.5164	33.9772	-0.45511
1963.46	109.824	17524.3	83.5564	182891	211953	208.552	125528	-2.03209	34.2617	764.952	28.415	49.8347	-3.4867
1965.84	107.426	15955.9	85.0075	164180	239673	156.835	109907	3.2372	18.709	843.405	20.1953	34.5996	18.4208
1968.22	91.8246	19292	56.1323	175646	222912	187.12	116917	3.70785	9.73296	783.747	41.3546	45.6676	1.56383
1970.61	93.8932	16863.6	114.533	165338	214997	206.207	145388	26.168	14.1709	544.899	28.1534	35.7851	14.5246
1972.99	97.6394	17475.1	82.5478	179938	215420	246.38	124265	25.3503	15.8956	756.004	16.1888	39.9917	-9.47668
1975.37	101.159	16731.1	8.63359	173571	222754	186.426	122305	3.53533	21.2715	972.095	31.0899	36.9959	-0.0540555
1977.76	87.8637	17707.7	14.5522	170268	228423	191.794	117502	-1.87844	19.9671	620.691	26.3429	40.3261	-6.38515
1980.14	102.954	17611	68.1321	185337	202656	215.959	136485	12.2061	26.439	657.905	17.6162	35.4982	1.57938
1982.52	88.7501	19132.9	118.208	178880	219576	149.093	118267	25.6835	20.0615	232.394	22.5915	45.3931	-12.7713
1984.9	117.261	18406.3	20.4165	204597	191973	171.66	125854	31.1919	6.44264	925.586	21.8122	41.788	5.5189
1987.29	94.648	16123.5	55.0028	168151	231954	111.837	116146	9.15349	28.8798	962.286	34.2428	40.2963	6.32391
1989.67	130.778	17649.1	19.9818	187685	213025	207.455	117400	3.55098	8.45243	696.578	33.4498	49.6643	13.9554
1992.05	96.7168	16600.5	65.327	173522	234766	219.908	104342	-12.6855	13.2434	665.058	29.8092	41.3268	6.21275
1994.44	97.4268	16077.9	48.4871	175661	221572	123.024	122016	-10.9048	23.6637	894.412	32.1677	34.3414	3.09685
1996.82	77.1497	17475	101.692	188180	207903	170.859	124665	14.7564	32.58	770.628	30.5273	43.8783	-3.23608
1999.2	81.0537	18080	30.3762	174895	218524	165.018	126122	-7.01937	6.12679	558.244	19.9779	33.5924	7.51996
2001.58	100.379	18746.7	57.4789	160593	240909	180.107	110561	-1.77536	22.7176	438.243	27.9491	46.0834	8.99439
2003.97	100.712	17129.4	126.632	168433	230715	193.004	116231	8.92563	18.7224	1301.78	28.8295	38.7663	4.62657
2006.35	96.2829	17135.8	-41.4309	169698	229272	227.564	117399	8.86636	25.8332	759.011	25.6324	42.2386	-3.10606
2008.73	128.632	17191.1	-13.5941	177569	217850	207.642	124374	18.2841	30.6313	450.636	24.9757	43.1477	7.71033
2011.12	102.916	21173.3	-20.3329	166691	230281	209.935	116114	-7.61308	25.2173	679.062	24.8707	38.0473	-14.7716
2013.5	119.319	16170.5	14.5735	172898	230367	253.462	112075	25.308	25.3998	876.662	27.5836	43.7002	1.54817
2015.88	105.326	17017.9	-19.3637	175958	205426	312.218	145131	-12.683	10.6723	1102.43	16.8758	41.859	6.23886
2018.26	109.172	19528	-64.942	181203	212555	259.406	125026	3.59892	18.1034	844.183	19.2509	52.4655	3.12865
2020.65	98.4849	16147.1	65.7194	167909	230630	194.193	118621	3.59343	9.83992	737.493	20.7432	37.6766	17.2404
2023.03	105.9	16716.1	24.8298	160644	237865	189.251	117083	3.43273	30.501	486.657	21.9978	37.4338	7.48041
2025.41	80.0383	17963.4	63.9446	176784	219372	215.57	122073	-12.3732	11.6831	802.8	25.3821	44.0535	1.51932
2027.8	106.657	15805.9	-12.7269	172957	229657	194.457	113587	42.5294	12.778	799.875	34.2019	42.3391	5.82925
2030.18	97.302	15665.5	155.032	171897	233758	205.732	108504	8.63368	-0.115639	1073.31	25.6586	35.2786	7.49154
2032.56	104.724	17106.9	-35.111	175355	224367	233.107	117479	19.218	49.2331	474.851	27.39	39.057	10.5966
2034.94	84.229	15158.8	70.4115	174233	225427	146.096	119157	35.5456	25.5983	577.037	17.5367	33.6982	7.15977
2037.33	105.35	17603.1	76.2565	163735	234726	214.65	116807	8.93245	-1.82761	486.154	13.7055	42.7493	-6.19589
2039.71	106.485	17128.7	125.306	167145	234718	244.061	112247	11.4887	-8.15638	840.436	12.8032	44.9884	15.332
2042.09	81.2238	17159.6	51.4148	174339	207492	154.648	144857	-14.5595	5.61568	298.712	21.7312	33.1646	8.88823
2044.48	102.859	14524.9	59.5444	176263	224957	165.873	117855	22.9268	26.1496	428.986	19.4441	34.3029	12.7748
2046.86	93.3255	15719.5	69.8173	160246	240138	189.118	115135	24.7464	10.8851	394.533	27.6944	43.7015	9.19806
2049.24	118.139	18390.1	53.9181	190162	215477	201.044	109663	-15.2551	26.4554	629.411	18.2409	40.5186	17.0759
2051.62	118.789	17969.2	-35.6339	189056	219965	188.314	104840	11.5567	18.1983	586.633	30.8823	40.2593	-6.14595
2054.01	103.461	16520.1	9.04649	186469	217489	207.663	113314	14.3131	22.1607	763.379	25.0232	34.9888	-13.9305
2056.39	92.562	16173.8	76.3011	159439	233009	198.518	126555	-15.2356	20.0095	572.433	25.0086	46.2322	1.57179
2058.77	110.9	17308.6	-25.3242	185023	215473	143.457	117806	-15.696	15.3259	643.273	22.6565	43.5063	8.0062
2061.16	94.7246	18308.2	127.919	175432	223238	181.56	117478	-13.246	12.0881	915.057	28.7874	32.1604	18.0177
2063.54	91.7169	15122.6	73.4002	200557	212450	97.553	103651	-17.2288	1.95954	500.421	20.4194	49.9882	7.47617
2065.92	95.7727	16751.4	-46.2354	185437	217085	147.564	115157	11.4448	4.11474	836.413	32.0513	38.6209	10.7084
2068.3	94.0622	17629.8	-54.5147	179311	224620	139.299	110923	-15.8	32.7515	1007.02	32.9849	43.5473	12.8919
2070.69	108.366	16744.4	44.4016	167144	234918	199.14	112641	20.4424	31.4593	576.474	22.8367	38.4014	7.68029
2073.07	101.306	16515.2	-90.1615	177375	223213	158.765	117383	-15.938	-12.6444	417.777	23.011	36.0759	4.90412
2075.45	92.9067	18255.9	187.63	163502	228233	226.489	125904	20.0432	12.5224	871.504	29.7971	33.8399	3.43021
2077.84	103.487	19302.1	118.797	178395	217923	176.055	120621	12.5544	12.3729	917.083	25.3656	35.5951	10.0815
2080.22	115.422	18789	22.6401	175538	223306	135.201	116887	5.46255	38.8963	866.986	28.6236	44.4259	18.9875
2082.6	105.801	16832.4	51.4185	183910	214726	244.274	120970	5.22135	7.62908	387.039	21.746	37.6727	-2.4176
2084.98	132.614	16668.9	73.6263	185882	219465	160.067	110562	-24.7536	29.3543	1114.77	19.6989	42.2854	7.048
2087.37	99.468	19330.8	-77.6125	177044	212604	220.529	130788	13.0319	29.6274	835.215	38.9987	53.4807	3.96319
2089.75	92.071	18512.4	9.60632	181670	216750	152.603	119209	12.1282	18.2017	596.62	25.2784	40.6361	4.90174
2092.13	102.899	18120.5	45.7885	179778	213965	180.479	126345	15.2974	0.82183	574.299	22.6781	41.372	13.3
2094.52	105.265	16124.3	15.61	184685	216189	194.195	117960	-16.0072	0.808544	947.98	30.259	42.0457	-2.38226
2096.9	100.799	18306.5	21.9592	174708	227565	180.485	112132	-7.6839	4.95766	743.922	17.1067	39.9339	1.72715
2099.28	125.559	15939	86.6974	186149	208252	137.38	128533	-1.89053	9.84963	604.029	16.8336	38.2422	3.3374
2101.66	108.745	17487.5	54.6796	188128	222375	116.829	102967	36.1784	2.07837	438.137	21.4462	36.0962	4.7617
2104.05	88.7892	17454	-102.294	166310	227667	162.646	124380	51.6524	13.9685	603.65	15.1119	32.8016	-1.47389
2106.43	93.9547	16615.9	-7.50045	168869	235033	149.514	110408	46.5477	9.76342	537.51	16.6976	41.2286	17.1094
2108.81	102.358	17028.5	116.549	174780	218139	201.184	127379	12.3102	-0.990284	898.205	30.4239	37.2524	-1.56205
2111.2	122.802	16617.6	4.03313	186892	216050	187.265	114731	21.3533	13.369	864.349	12.3765	48.4957	10.1567
2113.58	116.257	18632.3	116.592	176124	224800	205.409	114051	35.4179	15.6522	598.94	20.2877	41.2064	-6.81982
2115.96	124.989	20483	30.0007	171456	220772	115.649	124817	-14.3587	16.5933	735.222	30.3823	41.5266	-3.46112
2118.34	104.085	17420.4	80.2946	179202	221185	162.866	116440	10.1273	27.4947	862.208	20.5798	53.6868	10.5992
2120.73	91.7918	17177.3	174.529	180669	211896	157.689	129370	-16.516	13.862	320.313	28.7783	32.8176	0.0905297
2123.11	85.517	19106.4	86.1855	175817	218083	195.505	124405	35.7434	19.6507	526.477	27.2557	42.7075	20.9998
2125.49	97.1739	14959.5	-1.96061	188584	212527	210.707	120069	-1.92867	25.4205	225.702	14.8139	43.8487	1.77313
2127.88	80.123	17173.3	-26.6798	182889	215660	146.831	120163	9.87028	26.7913	1068.82	20.0468	38.5217	-6.72514
2130.26	98.5122	18207.2	-93.7967	175519	225514	224.644	114179	-9.27648	21.4305	927.631	28.947	44.2207	-2.43733
2132.64	99.8416	20676.1	55.0365	184005	208329	182.882	126574	-2.01019	9.60265	842.697	20.5804	34.1735	-9.08899
2135.02	115.287	17243.7	36.1937	185494	219574	142.309	111055	-2.01837	14.9966	453.005	21.5313	40.8688	-3.40927
2137.41	89.2662	17468.5	98.3507	195583	208009	143.851	114710	-7.99306	26.2546	601.022	12.7617	41.9187	19.1689
2139.79	99.3518	17550.9	-71.1894	185437	218404	136.15	112557	-8.75701	32.166	697.316	18.7766	31.1789	0.104587
2142.17	89.9178	15541	-126.346	158728	240906	215.866	116116	20.8504	6.27118	715.064	25.6372	41.7688	7.89392
2144.56	97.4859	19776.4	23.7587	181506	212424	140.819	124885	-2.03365	19.0733	536.86	22.6026	47.2936	-1.65526
2146.94	93.4635	16096.7	51.0564	166057	247644	200.565	95317.8	9.39426	3.07491	599.063	19.8498	39.2567	-1.50921
2149.32	105.081	17790.7	-42.7845	181828	220766	176.371	114027	20.601	24.986	90.9263	21.3832	39.6952	3.35329
2151.7	98.7345	16601.8	76.4841	149170	255308	152.568	105844	19.6337	37.0282	621.393	21.8805	32.8453	18.6267
2154.09	108.979	18576.6	105.435	179621	218170	177.504	119917	-8.04064	6.20065	273.446	24.7385	35.4459	8.8516
2156.47	94.4601	16776.8	135.977	190354	208929	210.622	120959	-1.97641	-3.40959	581.113	24.7633	45.8053	1.86214
2158.85	112.954	20576.6	-60.7949	177037	210148	167.462	133202	13.6088	24.9137	1031.46	25.6398	41.1214	4.20756
2161.24	100.995	16052.6	-13.8671	172223	220894	136.086	127782	27.1058	28.6122	842.471	22.1037	34.8214	5.15261
2163.62	108.337	17479.3	140.476	153866	245176	220.287	114130	9.90388	15.9997	516.339	17.5777	38.598	13.8106
2166	89.7668	14841.3	-8.01059	181653	220960	169.764	116684	4.00869	18.9754	231.372	28.6115	41.3918	3.58436
2168.38	94.2222	17941.5	-27.6884	180305	216214	203.158	122071	21.1954	29.069	959.26	24.464	36.5953	3.72151
2170.77	88.1987	16861	116.645	173107	226421	197.694	116932	15.9525	16.599	1136.42	17.7086	37.7779	-1.57689
2173.15	95.2238	16927.6	-38.3757	167205	234368	212.825	113479	20.036	29.8127	434.562	17.3651	41.6841	-9.98786
2175.53	93.8632	16147.9	149.732	172070	228989	224.028	115293	15.5058	-2.82398	842.464	31.8829	34.2818	8.0961
2177.92	115.643	18251.5	-33.3894	203630	199857	215.588	115312	4.07669	39.0914	899.88	20.7536	41.1932	3.65319
2180.3	85.8242	16818.8	93.694	168039	236305	280.428	109017	15.256	-0.957317	773.506	18.5324	32.1298	0.148449
2182.68	91.9758	16780.6	22.3833	169876	230509	184.209	115385	41.2334	3.16258	964.286	17.8546	32.892	-1.50619
2185.06	94.5609	16704.5	4.26604	172854	225127	173.575	119969	-1.83332	23.6232	704.945	18.1886	29.9698	-6.31386
2187.45	100.87	14766.7	63.9634	175397	231918	176.086	108112	9.55229	30.4454	478.928	12.1181	48.8992	-4.3732
2189.83	98.4294	17442.7	-52.775	182953	219107	142.131	114612	13.2968	16.0468	986.888	24.1587	33.8692	21.7881
2192.21	120.605	14313	35.2713	168901	241128	151.97	103166	34.8924	13.1021	570.126	12.5009	35.6269	8.66071
2194.6	108.743	17400.6	118.039	168540	229568	164.439	117958	13.1183	24.4885	915.084	19.5921	34.5352	6.26504
2196.98	116.302	17166.6	94.2772	188290	207958	169.774	124467	-1.99941	12.1655	1047.43	25.9104	39.6241	1.94445
2199.36	99.9488	18819.9	4.66313	182682	214898	170.502	120515	-9.48273	29.6887	427.022	22.9072	33.0245	31.4116
2201.74	107.265	19199.8	97.8213	183334	203484	224.418	136610	-2.07203	21.7421	369.106	26.8787	41.9958	9.35561
2204.13	107.478	15556.8	45.9971	188508	213472	159.613	117872	-20.8148	16.2861	532.15	27.2511	34.1398	-1.46892
2206.51	95.74	17580.5	22.667	174505	219230	117.566	125935	7.76946	19.3587	672.787	24.4993	31.8023	14.3814
2208.89	107.63	22412.1	10.9843	179898	215467	219.23	119518	28.0618	13.8397	813.234	27.0709	40.2251	-4.57522
2211.28	89.1716	16682.3	-86.6611	175143	220482	195.056	124110	-13.5555	19.017	695.727	20.5554	34.9878	5.22758
2213.66	106.78	17526.7	-31.8135	196089	198306	125.026	128260	46.5574	15.7232	1293.87	26.2173	38.1441	3.53896
2216.04	80.2916	18867.9	104.401	195746	206020	186.103	116156	-7.90751	19.9471	615.947	18.5277	41.6602	0.19273
2218.42	95.3325	16291.4	23.016	171656	216222	170.286	135768	12.7525	28.9392	472.758	19.0231	37.0998	-11.6448
2220.81	93.7793	18173.1	67.1836	168739	215799	101.606	138272	3.6956	22.2147	776.554	20.8289	42.7851	0.181291
2223.19	93.5545	21417	10.0118	184317	212568	167.577	119376	3.66897	18.1554	455.368	16.0955	30.3198	0.182213
2225.57	111.871	17661.7	-59.2644	181792	208672	184.839	132426	21.0675	21.5382	396.648	18.2251	34.9059	-2.45172
2227.96	110.339	19253.7	11.1556	176921	225227	178.99	112094	-1.95633	6.71129	428.329	13.6487	37.0752	-0.227675
2230.34	102.351	16732.8	49.7138	176558	216224	165.511	128992	4.14367	12.679	118.567	21.606	45.3544	26.7295
2232.72	82.2274	18578.1	-48.6511	184492	215191	164.183	117697	3.83348	23.4747	731.256	10.4271	38.7794	-3.07029
2235.1	83.0508	18255.8	24.0351	167412	229568	157.526	119104	-32.4424	16.0097	668.147	17.6297	49.3571	-6.81356
2237.49	93.3174	16418.8	79.5514	179577	213888	150.609	127950	27.8928	36.1093	1000.23	16.8347	40.5248	0.215115
2239.87	81.8143	15561.4	66.5392	155892	238527	114.548	123554	19.8956	20.6859	593.281	22.1142	30.9681	0.19743
2242.25	103.772	17125.4	-7.24995	176682	211444	213.037	135587	-1.84292	6.35113	367.86	23.3151	31.8515	10.0829
2244.64	99.9293	17033	90.927	176642	222173	165.237	119447	-23.9949	-1.88916	208.874	20.7651	31.7956	0.219893
2247.02	100.658	18215.2	-36.7663	184386	209045	104.282	127404	26.5221	17.1608	877.682	35.1222	34.302	18.2044
2249.4	91.1489	13787.1	-33.7821	176262	214880	99.6367	134037	-8.19599	24.083	621.851	19.1016	30.3144	-1.30436
2251.78	91.0028	18568.5	-47.4214	175237	229570	171.632	108667	-12.859	28.2347	231.983	22.6261	31.4323	-2.98043
2254.17	120.07	17752.4	43.4647	188923	210180	232.668	119766	10.2815	7.31711	908.986	19.0139	43.3521	9.07625
2256.55	91.0433	17760.2	23.7241	165967	231357	167.631	118717	-16.8957	1.42517	733.566	17.3148	45.4256	-8.39817
2258.93	95.9824	16532.1	-26.9046	172519	220347	194.435	127376	16.4302	18.5745	1266.23	11.2777	38.5431	-5.06396
2261.32	82.6341	17026.4	-18.7994	181572	212165	190.286	127847	-1.81069	13.9038	580.732	23.0014	35.8905	-1.39695
2263.7	98.7071	17627.2	-1.24216	169547	227078	182.809	120556	-7.93692	18.6654	697.151	27.9144	35.7753	-1.48797
2266.08	91.2899	18481.7	17.0864	197462	208351	84.2743	110966	-1.87498	21.3924	451.484	21.3817	36.6608	-1.44321
2268.46	102.376	15498.1	-62.5897	168782	229258	131.977	120251	-13.6571	24.384	872.701	14.9465	42.1755	13.8205
2270.84	88.2617	17630.5	-48.2997	184475	209547	160.556	127353	-10.1106	7.69591	663.952	15.4441	35.9367	-10.8677
2273.23	78.5293	14509.5	83.6185	156386	246113	143.013	112188	-9.11121	12.9468	710.639	22.0671	44.8215	-6.44619
2275.61	98.3577	15665.1	118.245	163774	224354	124.636	134599	-2.03868	36.9978	327.802	34.9086	49.1339	18.1527
2278	90.9509	18687.5	4.9285	176107	233896	111.324	100082	-1.85266	6.91622	932.067	25.2424	35.2462	31.0981
2280.38	101.083	18862.5	5.10838	162258	230171	135.044	124874	20.5469	19.1058	250.834	23.6317	32.6166	20.9961
2282.76	106.605	18285.4	-40.3321	182367	218373	195.063	115867	21.4475	4.99158	766.099	22.9087	38.4151	-8.74243
2285.14	110.188	16085	71.5429	194992	198582	155.205	131490	-2.02614	18.1803	346.895	21.6457	43.9216	-7.02477
2287.52	118.666	16838.1	52.0383	167322	230990	158.502	118042	13.8892	9.14877	924.214	18.8627	37.0593	5.79809
2289.91	102.874	16226.3	5.43702	177949	218361	202.689	124028	5.85559	17.569	486.813	32.7827	35.4388	2.10026
2292.29	108.513	18980.8	63.6712	170009	224124	206.565	123302	4.22339	30.6787	379.9	20.9884	37.2572	-0.163804
2294.68	107.351	18739.8	40.5293	176921	229940	150.879	105300	-1.8142	21.3009	494.484	20.8165	35.1777	-3.01597
2297.06	107.583	15853.5	-37.5272	174959	220213	165.874	125557	38.9535	17.2109	563.733	22.1763	47.7751	1.95307
2299.44	89.9527	16904.8	-62.0446	176903	210139	98.8582	137112	-9.17597	15.8657	999.403	19.7796	35.6603	-4.786
2301.82	107.34	15849.3	-19.4695	186945	215081	121.556	117024	9.92235	17.8927	837.173	28.2513	38.1842	4.10959
2304.2	80.6052	16898.5	89.3497	161497	238959	193.789	114131	-9.0467	16.1085	427.416	18.6938	37.8534	0.275722
2306.59	102.882	16783.2	61.3755	183238	220038	189.166	113603	4.07184	20.0179	616.096	37.8271	38.929	2.01107
2308.97	123.44	17799.2	-14.3603	178088	220192	147.768	119116	29.8997	16.8205	926.402	33.2595	46.9745	9.06009
2311.36	110.958	16354.2	-69.3424	162354	238606	197.33	113767	-19.7653	8.0957	883.343	26.0011	40.2079	3.72852
2313.74	103.191	16994	41.778	190035	216603	193.621	109452	12.7498	15.8578	659.116	20.5772	45.156	8.71516
2316.12	111.707	17710.3	16.2534	177119	227699	171.407	109324	-1.73374	30.4728	633.149	16.9189	45.7375	-15.4679
2318.5	98.2368	18103.4	130.143	166183	234433	182.641	113204	39.9497	16.7052	674.333	19.3753	41.1889	3.74939
2320.88	94.8824	16163.3	-13.2	192710	214654	179.443	109570	64.5051	15.5468	741.663	26.5802	35.7029	14.7644
2323.27	85.557	17892.5	-53.0418	177510	215147	157.579	128036	5.82063	14.9501	522.708	26.3559	45.6076	-5.07985
2325.65	92.9409	17798	-36.0584	165367	226533	184.45	126870	-1.78346	14.8271	743.47	20.6017	36.9286	8.40371
2328.04	98.6791	16449.3	5.0562	169768	228366	143.372	119328	12.2592	23.7509	796.423	29.2395	33.7181	1.91157
2330.42	98.9897	17228.8	27.7906	180962	225940	247.727	107119	36.5528	9.62231	705.081	19.2577	40.9962	6.59651
2332.8	101.121	17169.9	22.6583	160548	239440	217.294	114066	-15.8126	4.06001	850.544	17.4016	44.7002	3.53524
2335.18	92.5027	18113	-121.539	184535	213496	182.796	120801	-7.61361	22.1647	652.384	15.4909	42.2787	11.9859
2337.56	116.617	17047	47.2199	180118	205143	190.496	140093	19.7333	21.1065	870.574	18.6181	40.399	1.96593
2339.95	96.5586	17751.3	95.8263	172234	231973	178.775	109287	5.40229	1.42179	614.986	29.3032	39.3126	-1.3553
2342.33	109.731	15481.6	10.7727	178467	227544	181.391	109560	5.1406	4.42411	993.35	22.4648	31.505	9.82242
2344.72	97.0694	15527.9	77.3045	162420	241210	194.607	110607	11.659	2.16544	567.471	17.2907	45.2332	-0.0916545
2347.1	96.5172	16636.2	29.0008	183319	216793	153.724	118875	20.9716	13.1976	403.224	13.6398	42.9315	3.59831
2349.48	104.275	17410.5	33.1329	176253	227461	132.785	111366	-8.44497	41.7543	399.604	25.057	33.9074	9.63754
2351.86	96.9575	19115.1	-71.2	158179	232873	179.297	125824	-15.8498	26.5204	580.449	18.2376	34.861	-4.14935
2354.24	91.8904	17107.2	161.943	180302	216349	231.821	122733	-1.75185	18.2224	663.216	16.4554	34.4436	17.9638
2356.63	97.1752	18375	28.6466	168069	226296	201.298	122959	33.3228	13.0233	669.352	23.1171	30.8389	11.6554
2359.01	91.9254	18658	-18.5597	194607	201367	131.306	125436	-23.2366	21.9203	349.597	23.3357	37.7953	11.8706
2361.39	112.349	17988.2	86.4412	178993	205142	206.863	141204	-12.8694	8.91274	322.131	25.0411	38.8345	1.92558
2363.78	123.624	17931.1	63.267	188032	219137	156.347	107148	-1.74801	30.6449	878.487	14.8901	49.9985	21.1821
2366.16	119.083	15886.9	28.2839	151400	239625	170.326	127477	-15.5712	4.46209	730.992	27.2513	39.4193	9.90053
2368.54	77.8443	18849.6	-0.563837	184671	207488	160.501	128826	-15.1992	14.259	835.599	34.9495	37.2222	11.2248
2370.92	102.248	16030.4	83.1834	161291	231978	125.863	125565	-8.96518	5.9957	849.897	29.6449	37.1037	-1.31222
2373.31	115.214	16607.2	64.9087	181239	207758	218.63	135313	-1.78797	5.05383	532.625	29.6855	33.9819	-1.3028
2375.69	103.401	16988.9	131.715	183991	214693	221.594	120174	-13.9624	39.9892	933.609	22.0883	32.8738	9.06835
2378.07	96.4861	15671.3	39.9933	175205	224103	110.881	119451	-8.67055	26.1417	589.594	33.5494	37.4479	0.337254
2380.46	96.1015	15695.9	41.5228	165399	234120	157.559	117200	32.74	15.6606	686.238	12.979	39.4055	0.352456
2382.84	108.272	15724.3	30.8394	176319	225748	196.597	115067	5.63416	24.9819	832.99	19.4663	33.8668	9.04054
2385.22	98.4719	16303.2	214.416	165811	237831	184.477	110383	-7.50684	7.81004	478.711	24.1408	38.8769	6.95256
2387.6	97.8164	15447.3	-46.7279	185107	224666	225.505	105575	-7.27058	20.374	445.829	17.1569	33.5285	19.5186
2389.99	120.044	18760.7	74.2635	177018	213349	147.109	129976	5.59577	29.0825	980.825	27.7061	46.1314	4.24811
2392.37	87.7591	18938.5	94.854	172217	228738	154.799	112718	26.756	15.5353	1048.49	22.4879	39.068	-1.28478
2394.75	106.958	16694.5	50.4253	176803	229559	183.112	107754	-28.7468	26.3745	749.798	22.8425	43.0953	1.90578
2397.14	99.025	15860.9	18.4944	167481	234559	163.561	113770	-1.88953	32.9183	487.623	23.0236	37.5278	9.12783
2399.52	111.35	16691.2	76.043	172346	224327	146.387	121790	-1.75575	18.0313	707.862	23.7798	29.3768	8.08243
2401.9	113.754	18782	149.085	162564	230025	185.937	124156	-16.778	11.4912	711.285	29.382	40.0159	5.55153
2404.28	110.644	20268.5	24.9874	187671	211706	119.284	117449	4.19059	11.7159	234.396	26.1104	40.5177	12.6827
2406.67	101.47	18003.8	-69.1244	180539	214129	127.193	125238	-9.34263	15.8171	732.533	17.6897	45.7072	9.02439
2409.05	77.6134	18557.4	122.973	184592	208351	171.182	127331	20.7547	29.2219	1246.74	25.3249	37.9882	-10.1746
2411.43	99.0314	18515.6	5.756	179744	215635	125.236	123822	9.91803	24.8822	283.019	18.1788	36.6349	7.16512
2413.82	105.259	19966.7	-6.37611	179770	214900	226.705	123130	27.015	44.1614	556.444	18.6456	39.7045	17.0021
2416.2	87.1718	16188.1	-29.944	170382	227085	217.665	120952	3.90975	26.2895	529.349	27.1137	35.9068	8.15038
2418.58	106.753	19970.9	-12.8466	167868	226440	164.939	121874	-7.84381	32.5321	327.145	21.8982	41.2602	14.2197
2420.96	90.1058	19144.4	168.735	194735	209779	144.759	110653	20.6313	25.4229	1449.97	22.781	37.1453	-9.96906
2423.35	119.983	19753.4	63.9129	201162	193340	159.913	127265	16.5524	25.1024	693.462	25.1002	39.8291	14.6206
2425.73	111.12	17055.8	-53.5918	176252	222985	167.531	118485	12.4251	23.5972	529.589	31.912	39.6281	-1.24368
2428.11	98.7992	17542.7	34.4452	170927	230935	141.588	112797	12.1363	12.0064	749.595	23.3805	37.1557	9.97374
2430.5	98.4431	17950.9	23.8674	179206	226985	191.71	107514	21.3189	6.07238	446.054	20.7235	39.5456	2.07058
2432.88	79.9542	16712.5	140.705	163643	235512	185.633	116661	-9.154	28.6362	377.555	27.2482	34.173	-1.27971
2435.26	93.6267	16399.7	-11.6423	171517	217965	162.776	133032	-1.68918	31.0205	686.538	32.2787	35.6369	3.9344
2437.64	93.2291	16494.7	82.2833	174347	223876	177.443	119744	-7.38884	9.5387	964.019	15.886	36.5424	5.287
2440.03	93.8081	19110.9	-35.2254	172996	222360	177.8	122000	-1.72594	29.9489	395.587	18.8756	30.982	8.46381
2442.41	99.2696	15868.7	130.902	169472	228209	151.54	120372	17.2648	14.1974	790.549	28.8947	39.0762	3.7041
2444.79	95.1389	16543.9	-50.1734	183307	211657	198.398	126680	13.1138	11.0676	635.723	19.3586	33.4373	17.6918
2447.18	108.942	14663	53.7834	164253	221405	158.417	139292	15.4569	-4.0246	572.988	22.6114	30.2153	-2.89335
2449.56	113.651	17666.5	180.36	174702	224596	132.857	117279	4.12628	29.5693	537.305	20.1283	37.4893	5.59698
2451.94	102.354	18085.9	-6.62097	172504	224968	261.228	118881	-1.90789	10.9746	1118.33	23.5338	48.7873	5.82018
2454.32	106.56	14162.7	30.7517	176920	222744	190.437	120480	27.7689	17.557	685.924	20.807	37.7593	0.439222
2456.71	98.9329	16510	-35.569	168351	218635	99.3633	136375	-7.4002	23.1076	582.95	22.2852	34.794	-2.02619
2459.09	97.7781	19605.2	91.8059	186983	219297	172.259	106578	-14.5099	44.7255	1012.94	15.9235	46.8659	24.051
2461.47	102.468	16488.2	-83.4264	182129	213046	236.102	126243	-1.88573	28.9863	592.778	19.8594	36.8868	5.77582
2463.86	96.4388	17671.2	77.9425	177564	221114	157.581	118894	15.48	22.5572	499.274	28.2884	31.0525	-2.8795
2466.24	124.425	17974.4	-31.1293	193029	200060	172.374	129648	-7.77881	27.6307	881.908	13.3979	37.4278	14.189
2468.62	108.611	14961.3	-12.4612	169609	231650	219.701	115723	27.9025	20.0162	957.519	32.5947	38.4886	4.31422
2471	101.799	15895.3	266.776	184539	219074	167.087	113763	16.0093	3.42833	823.037	26.7411	49.8348	3.88705
2473.39	135.01	20718.9	61.6977	177104	217241	227.469	122540	-2.01201	26.8344	358.706	27.7079	36.1022	0.035924
2475.77	101.338	14605.2	31.6916	181835	214946	251.668	124857	4.21355	2.53702	1193.52	23.0509	41.0108	8.79255
2478.15	107.004	17210.8	-99.8944	180722	220996	208.268	115350	6.02148	29.6126	553.957	25.1096	36.2414	4.17931
2480.54	112.143	18270.6	84.9553	187199	213778	256.356	116239	23.1217	25.0688	644.551	19.3603	47.5217	14.9347
2482.92	103.257	16095.2	161.682	172488	230650	152.464	112333	-1.75248	4.68474	812.585	18.545	36.3285	-2.85362
2485.3	86.0697	16141.3	-30.7724	165827	228427	210.438	125203	39.5149	18.9392	360.268	30.7002	39.0402	29.411
2487.68	97.164	16349	-31.8358	197159	209017	172.296	112264	-9.50493	32.7654	570.173	20.6206	40.1392	9.30293
2490.07	112.609	21745	109.463	175537	215689	203.179	125748	10.4479	31.5741	634.714	27.7273	43.932	13.3858
2492.45	124.855	17686.6	-40.5608	180701	216568	210.417	121352	-1.97918	9.4491	856.92	16.4278	42.6345	-6.96372
2494.83	90.2188	15030.1	100.257	151666	248924	168.258	113524	-15.8288	1.01942	927.05	22.2123	33.6477	5.34227
2497.22	84.9446	16675.1	25.1902	180244	220360	246.783	116919	13.1869	26.9418	1006.05	25.3278	33.0121	4.38894
2499.6	97.4837	17942.6	66.506	183191	214428	176.615	120979	-8.98551	17.6348	819.044	19.5017	47.1267	5.47697
2501.98	94.3107	18026.1	37.303	197533	204171	169.177	117645	13.0262	17.1543	381.17	20.0123	38.9635	2.20103
2504.36	102.923	16218.6	6.59586	175659	221469	158.911	121811	10.4602	2.59238	1152.41	28.6076	39.3607	0.512057
2506.75	97.1279	15616.7	6.47637	171289	230545	227.22	114931	28.3787	25.1823	505.161	23.7812	40.536	-13.0033
2509.13	97.7804	18466.3	-52.6274	194376	211546	209.411	110286	-1.92089	6.19233	385.941	24.8942	41.2516	9.19618
2511.51	91.3756	16073.7	6.50976	190667	211120	155.444	117982	22.3578	21.3514	622.714	26.3511	35.7815	7.48761
2513.9	87.9967	19213.6	-12.4016	181287	216515	201.487	119198	-19.9365	22.269	855.028	23.7491	43.0168	3.99256
2516.28	102.192	18398.1	76.1444	162067	222822	179.154	136429	-7.89748	16.5642	604.327	14.4787	34.7233	-2.97993
2518.66	81.8743	17929.6	122.64	186089	219284	139.481	109834	20.2083	30.0473	565.766	18.1251	35.7757	14.0284
2521.04	97.3888	17464.4	105.505	170572	235463	158.416	106761	-16.6202	30.8658	304.324	24.1657	35.0816	9.06107
2523.43	109.135	16136.3	-56.693	169664	241713	168.532	99539.6	13.3203	6.90922	663.153	21.296	31.9091	5.76873
2525.81	115.548	15959.5	-19.705	181401	218017	186.15	119919	10.8421	1.17416	781.102	26.0275	33.9179	4.2386
2528.19	101.905	17124.4	70.814	172666	222534	190.326	123748	41.1198	6.50928	572.588	18.9785	44.0469	-1.23526
2530.58	106.71	17348.3	25.921	181248	223760	189.659	109987	4.28271	23.6309	730.722	21.557	44.0279	7.61759
2532.96	111.016	15740.3	40.3226	191565	206516	206.561	124019	-17.8886	15.9346	657.145	32.2971	45.2097	11.6103
2535.34	95.2903	16386	6.89326	167147	223870	195.26	129978	16.9222	8.15531	564.61	28.1989	38.5669	2.3637
2537.72	120.025	15797.9	32.1964	182179	214283	119.191	124475	5.78682	16.204	1041.48	20.5745	37.8062	4.06206
2540.11	88.4772	18117.2	-5.83072	160868	245112	215.282	103564	-16.6013	4.40062	1432.16	22.4799	44.4506	3.94759
2542.49	117.064	17373.2	33.8465	174194	226641	265.041	114606	-17.9528	19.5781	1197.29	23.4102	41.5025	-4.97019
2544.87	95.4799	17320	125.792	190766	210207	166.039	117910	13.8991	6.71365	630.2	19.5351	40.3438	2.39289
2547.26	101.955	18300.6	63.5455	187256	210212	164.174	121637	10.274	7.38713	758.966	36.5343	37.1866	0.547653
2549.64	110.533	17632.8	0.415645	171249	225262	180.826	120660	10.2338	41.9283	1008.48	27.9218	45.7369	13.1412
2552.02	82.5888	15707.3	12.4554	183659	216053	202.521	119568	5.47751	21.3076	1338.39	24.3147	36.8243	29.2304
2554.4	85.1202	14507.5	18.3815	182888	229820	180.857	101396	-1.7228	6.55262	664.29	22.5587	35.2705	-6.08985
2556.79	107.337	16273.1	-5.58099	177657	215127	248.609	128864	5.47615	20.838	965.413	20.6524	32.504	-4.45691
2559.17	120.72	16394.6	48.8922	164039	231453	191.957	122342	-16.2421	9.40508	784.148	16.2934	36.2147	-4.48149
2561.55	105.53	16170.7	-58.4624	181048	230830	133.653	100896	-22.8494	11.8474	598.793	31.7054	42.06	2.15243
2563.94	116.967	19256.1	57.1204	182268	212263	227.661	124425	-24.4081	19.8666	600.774	27.9399	38.4723	4.4748
2566.32	116.267	16465.5	34.8879	168936	220618	174.144	132170	12.0896	24.2421	813.598	23.9241	35.3255	14.7773
2568.7	102.262	16290.8	43.0534	187673	209693	181.35	123516	-7.56569	16.4096	1106.44	25.3558	36.3534	0.549325
2571.08	103.296	15637.4	37.5635	176728	221143	195.955	121792	27.7873	15.7168	646.417	24.9083	33.8769	5.67479
2573.47	113.885	14855.4	-22.1599	172368	227510	182.737	118862	5.1607	26.5428	540.908	21.3427	39.445	23.9935
2575.85	122.64	18989.2	25.914	169823	221879	151.413	126844	-1.81468	7.91964	624.861	22.1733	39.8952	6.71048
2578.23	102.279	15959.1	75.454	173291	225092	127.526	120242	-7.169	41.5258	496.799	37.2261	39.3549	4.11238
2580.62	91.6603	18681.5	-52.1917	181169	212767	165.613	125884	20.7727	15.8222	595.513	24.0397	26.1486	4.18302
2583	107.809	17384.2	87.2882	179652	226378	126.249	108474	-1.76936	-9.28238	361.523	21.657	35.0987	2.28512
2585.38	126.021	20112.8	-18.5736	185898	213793	116.187	116407	28.838	8.98157	670.673	37.0467	31.1499	8.99913
2587.76	95.9371	17355.2	6.37445	166140	222814	104.848	132063	-1.65254	7.68008	642.181	31.5538	28.4266	-7.85581
2590.15	121.013	16804.4	-24.4922	182590	222216	152.006	111044	-1.79221	25.1286	832.817	23.6647	34.7734	14.4765
2592.53	111.413	20038.6	7.24829	178456	212370	197.634	128654	-1.86947	12.709	686.815	20.2829	33.3673	11.4887
2594.91	102.592	18271.9	-58.8653	174508	228429	146.713	110950	4.00411	15.1668	1027.75	25.6141	37.7126	-1.90172
2597.3	106.903	16570.5	22.9084	164950	240040	147.627	107853	-1.58741	23.5774	790.545	26.9979	32.8449	3.6108
2599.68	87.4815	20216	-5.59674	182371	211055	167.007	125141	-9.3413	30.5119	835.497	25.4354	39.9532	0.60254
2602.06	88.4414	16873.1	116.232	180555	212254	120.849	128867	5.2744	23.9972	837.146	16.3125	38.6829	4.14588
2604.44	125.737	18585.1	112.864	164662	226802	133.727	126574	-7.73747	28.252	613.87	27.652	36.9804	10.9259
2606.83	82.3933	17448.5	170.319	175880	215667	183.188	129306	13.2531	14.5746	812.861	21.1095	39.8013	15.3533
2609.21	95.6889	15456.5	96.4186	174158	230360	80.7376	111815	11.8883	25.9785	206.857	20.45	33.6889	-8.78851
2611.59	103.012	18982.2	39.2718	180296	221298	171.5	113834	-1.81959	24.1915	334.526	39.6879	39.7871	0.18295
2613.98	110.846	17281.2	132.648	181591	224904	206.057	108012	6.02142	16.812	404.893	14.1669	39.4175	2.46633
2616.36	105.286	20772.1	160.683	175248	204557	151.449	144112	30.0041	-9.45454	635.523	27.7613	40.7211	9.39328
2618.74	101.725	16565.7	143.602	175959	200724	159.998	153143	-1.92477	2.80639	606.432	25.584	34.2757	10.0574
2621.12	99.3414	17541.3	49.0135	159991	234782	121.846	121520	-8.9219	9.39351	966.317	15.3881	48.6927	-4.3969
2623.51	96.3157	16790.5	37.3615	187350	214560	182.979	116669	42.0382	7.63596	355.403	18.8339	47.3149	15.7526
2625.89	95.8671	15968.8	65.2821	167540	237307	188.125	108811	13.6004	47.4193	992.731	25.9791	47.4324	2.42313
2628.27	120.727	18118.8	7.79362	182507	210287	141.124	127996	-8.47943	28.9303	948.122	25.7346	39.0594	10.1286
2630.66	111.954	20205.6	26.3822	190366	215151	213.709	108116	28.7059	25.498	647.216	19.6908	37.2475	0.642084
2633.04	108.363	18667.1	-43.7369	170058	219911	175.93	130107	-20.1301	13.359	450.975	24.0126	40.4342	0.64558
2635.42	105.456	17828.1	150.638	176946	218046	211.885	123851	16.1669	1.15684	807.419	20.9647	38.9887	4.08079
2637.8	95.953	19091.9	45.5507	170785	219035	161.25	129517	13.4663	-2.22314	923.375	21.4194	40.9739	9.45458
2640.19	100.778	15516.8	86.9563	183819	217754	186.259	117701	-1.73156	37.7474	415.452	14.0318	34.0182	9.11793
2642.57	97.7791	18031.3	19.0821	169357	229413	204.725	116925	4.09519	16.8502	559.109	23.6098	37.5775	2.29556
2644.95	94.5105	16480.2	-5.12584	173583	222390	160.161	123714	-1.70047	16.8119	371.107	13.7949	33.4473	3.96202
2647.34	100.538	16528.9	7.42785	181365	223468	201.616	111100	-17.1992	16.9065	752.286	24.1925	40.4579	7.76853
2649.72	92.786	18053.4	52.327	166485	240047	176.461	104395	5.87729	13.9348	691.368	18.0989	36.9432	9.08491
2652.1	99.6236	17075.7	-86.3222	183921	213896	201.29	121843	4.22057	16.4012	768.35	19.27	33.1251	4.09602
2654.48	107.066	18127.7	25.4753	186293	214916	243.233	116042	-13.4445	20.3106	621.774	20.565	40.9883	-9.50416
2656.87	93.0461	16683.4	-99.099	179147	221025	186.33	118215	5.39516	7.84421	325.047	24.527	35.9966	2.24517
2659.25	110.31	17092.6	19.7913	154790	239567	203.321	121824	16.1977	19.2988	692.475	20.1444	34.8596	0.659785
2661.63	96.4913	17122.4	39.9882	179882	219910	180.289	118110	5.94492	17.0594	558.327	21.7803	41.3866	6.06006
2664.02	104.202	18031.6	32.702	162688	231982	234.184	121822	10.3403	33.0542	681.262	15.2802	36.694	6.78567
2666.4	110.875	22592.7	42.1706	176517	217685	210.911	120747	-10.0921	22.1551	567.242	21.11	41.1757	0.72983
2668.78	88.3957	15748.9	126.011	182184	212464	206.099	127876	-14.4241	4.24877	301.84	23.6197	30.2145	7.96443
2671.16	124.711	14770.1	27.4252	168938	218909	199.193	136406	4.45067	39.3238	788.197	16.7419	46.8754	11.5833
2673.54	113.524	19671.4	-51.5089	176289	219124	226.135	121517	6.04449	10.2966	831.717	17.6872	35.8717	2.53071
2675.93	74.1757	15505	39.5934	145964	261355	143.398	101947	19.5836	4.41118	798.546	19.2606	44.3049	0.597835
2678.31	116.261	17460.9	1.18245	184595	224382	160.005	104624	10.6229	25.0214	538.881	24.4234	40.2827	-1.0867
2680.7	104.879	17858.8	86.7533	171028	225550	162.15	120190	-1.70547	4.42788	1112.35	22.1827	35.7603	14.1799
2683.08	125.309	17016.3	143.408	188665	218510	157.743	108563	45.6567	15.3377	264.85	28.2592	40.5825	7.51051
2685.46	93.6617	17071.9	92.9892	185407	217500	216.471	114361	-7.56738	17.0526	508.065	16.8467	36.6174	10.8179
2687.84	101.11	18264.9	-11.7074	161755	226644	217.015	130861	4.39212	13.0781	956.32	23.4521	33.7732	2.49992
2690.22	107.417	18653	136.09	177625	220135	189.765	119203	-1.78641	32.1059	532.911	31.0652	39.2678	16.6719
2692.61	135.005	16797.8	-5.30322	203147	200230	252.703	116776	-9.74796	21.945	854.784	18.6292	34.2222	9.40461
2694.99	87.7715	17057.2	176.383	181084	226916	199.726	105265	-1.80217	20.5487	1019.23	17.4083	34.7416	6.99292
2697.38	92.5389	16251.2	-36.6862	190533	215963	117.403	111056	-1.75705	11.3541	251.341	24.6463	30.2222	4.20342
2699.76	108.969	16812.4	-45.1642	188361	204744	254.807	129872	-8.2107	27.6622	880.321	25.8953	40.9513	8.09109
2702.14	101.933	16138	194.821	202556	203685	223.869	112967	10.5638	13.0532	614.954	19.916	40.0222	6.07183
2704.52	88.7856	17696	-4.93477	162387	237285	185.709	114814	4.2523	11.6961	422.02	17.6152	39.3383	7.61214
2706.9	110.521	18739.2	7.72281	172486	214581	200.981	134373	21.1505	12.4321	884.553	24.0012	37.0395	9.53861
2709.29	106.887	15691	138.32	178199	217209	161.625	125874	-9.61083	15.1935	480.57	23.4263	37.2616	-1.05737
2711.67	82.7642	16976.7	7.71447	175832	223339	232.879	118179	5.84596	22.5613	880.389	28.163	41.4026	11.2535
2714.06	110.388	15846.2	68.0994	170223	231103	160.779	114938	10.9231	15.0242	882.684	18.7852	38.9836	0.765463
2716.44	124.371	18906.9	-58.7809	182925	218112	204.227	114651	-8.26107	17.1351	1031.28	28.7777	34.6707	24.8076
2718.82	115.523	19535	-62.2092	170020	220455	237.504	127763	28.7049	22.114	1137.35	19.6408	31.5307	-1.02145
2721.2	123.55	18643.9	169.046	171161	228935	100.104	114408	16.7391	23.8847	634.409	25.9734	29.9331	13.2103
2723.58	86.0513	13980.9	100.67	183613	213810	177.945	125322	20.5687	24.4125	591.445	23.3288	38.7783	0.72244
2725.97	112.083	17798	170.747	168770	226960	151.36	121445	-34.2736	25.599	707.959	13.6043	41.3973	0.790819
2728.35	113.14	17819.9	41.3095	180581	218763	194.171	118192	-17.7001	13.9419	611.525	24.036	39.6656	2.60854
2730.74	103.932	17266.4	-80.9743	186164	220348	197.608	108840	13.4337	26.888	643.542	23.8395	33.9729	11.2534
2733.12	112.676	15067.5	147.614	171694	227769	107.719	118927	28.6685	19.1797	644.775	19.6079	41.6914	14.7861
2735.5	109.707	18170.4	-46.7076	152082	240471	175.049	122565	6.36665	35.6149	1319.77	18.5254	44.705	17.9832
2737.88	108.781	17801.2	192.08	171464	217943	166.284	131667	54.8108	17.3275	483.987	18.5064	41.3549	-6.47656
2740.26	115.479	16563.9	69.9935	179137	220434	81.3001	118655	30.8486	27.9459	735.965	28.4553	36.3169	23.9398
2742.65	107.918	17842.9	227.369	179124	214443	203.616	126549	5.9512	17.021	555.063	19.9107	31.4012	9.23566
2745.03	100.671	18291.9	42.2511	197511	212686	237.532	104049	6.24313	16.8207	686.703	32.7248	34.1442	-1.05653
2747.42	95.4235	15139.3	27.8805	170202	232532	210.148	113921	6.0556	14.811	402.335	22.0183	38.677	18.9149
2749.8	109.878	16451.1	-18.3519	173075	226625	93.0541	117597	-1.82798	2.83416	800.524	19.6838	43.4757	17.3845
2752.18	92.5267	16049.5	106.858	171273	232395	131.66	111668	-7.21105	16.7942	558.065	23.586	32.42	8.79588
2754.56	90.063	15452	-38.2481	179500	220085	184.313	119686	-1.82202	10.9589	1004.57	13.3703	34.1796	4.48626
2756.94	106.878	15861.9	153.449	170896	230286	150.747	115477	22.5009	20.5611	544.226	16.965	38.1326	-6.21652
2759.33	96.9099	18382.7	39.6522	194387	212439	193.591	108747	5.8512	15.7551	525.389	23.8114	40.4491	9.52428
2761.71	99.4692	15420	57.9986	179740	223860	163.785	114059	-9.20627	2.66846	422.47	15.1052	40.2596	-0.960056
2764.09	126.776	17452.3	21.5789	192941	210923	334.518	113549	-1.80644	5.84851	793.894	21.2998	36.9232	6.29627
2766.48	88.3355	17059.4	50.8983	180450	212021	173.124	129280	-1.91247	13.1524	775.992	22.5629	46.3069	6.67267
2768.86	83.6966	15973.5	63.1282	161173	238330	175.491	116045	-7.56365	22.8043	851.799	23.1036	47.2083	10.9498
2771.24	90.495	18432.3	52.0599	166646	226880	201.708	123764	-24.3287	5.57225	930.808	7.55869	30.6523	11.2184
2773.62	88.7236	16504.3	136.927	182845	223454	183.261	108747	8.52035	17.9847	1031.11	12.926	35.6449	15.0268
2776.01	91.7589	14805.8	32.3402	193581	214839	164.14	110058	-9.01187	11.9854	129.423	17.2697	35.8806	-0.925644
2778.39	116.55	18096.7	35.8685	182206	204818	264.972	136508	22.5601	20.5515	1088.84	21.8831	38.5498	-1.02309
2780.77	104.279	19279.5	101.976	192017	209074	238.713	116149	28.7346	22.1522	448.916	34.1876	35.2334	-4.46965
2783.16	105.347	15172.6	38.5908	167336	230036	201.99	121716	-16.3787	15.2939	281.579	13.9889	30.4577	6.71618
2785.54	104.823	15777.7	51.3946	162418	225836	141.076	133784	-1.68522	22.0812	725.369	24.1508	43.2215	4.64313
2787.92	107.681	18511.4	45.7543	179067	218885	208.435	119532	-1.70468	23.3076	404.19	26.7689	41.5049	6.00304
2790.3	82.8768	16965.1	-40.6084	159918	239644	189.022	114919	5.60113	-0.179413	856.856	9.70137	35.6651	0.772506
2792.69	110.703	15654.9	122.726	174485	227791	231.615	114670	5.89166	6.12856	507.818	13.6285	28.4217	9.16252
2795.07	119.149	23117	89.8169	167850	225606	127.834	119757	-1.97986	7.59745	628.434	44.18	37.5333	13.0484
2797.45	99.7947	18843.9	63.426	169066	227710	103.369	118742	47.1675	38.8837	945.433	20.1284	46.0177	-1.00528
2799.84	107.134	16664.5	73.8532	171798	230448	142.367	113486	23.2713	10.7913	360.092	20.1598	49.6216	15.2889
2802.22	110.391	17964.8	-32.1764	188003	218874	186.257	108125	6.33903	18.0845	397.969	27.5441	29.9485	6.55563
2804.6	99.308	18991.3	112.939	175121	220658	174.602	121467	13.8655	-3.67504	621.914	13.1012	34.6998	15.2744
2806.98	90.2481	15170	7.84304	181289	224593	165.275	110604	4.14787	26.5489	966.264	19.4161	39.3354	19.1162
2809.37	101.594	14670.8	-4.44846	181468	225714	204.15	109550	-7.85172	-5.55174	530.22	21.445	33.9959	7.02014
2811.75	97.8918	17485.8	-61.3804	172357	231499	185.686	110151	21.0261	14.3253	720.377	27.1906	38.4519	4.32808
2814.13	101.359	16870.8	38.5678	172431	224300	208.925	121623	6.73876	18.1079	579.81	24.3604	39.9177	38.083
2816.52	103.439	20199	21.4454	187271	218039	233.332	107932	-1.7455	2.29634	657.073	23.4623	37.9024	0.855747
2818.9	86.3651	18612.4	97.4272	190964	204882	201.894	124263	-1.83297	15.4076	942.839	21.9052	34.9661	26.282
2821.28	113.028	18215.1	38.0204	164162	232680	231.902	118635	-8.7762	-6.74683	681.352	34.5773	30.3651	-16.8321
2823.66	103.597	16880.5	94.9016	191900	200944	291.851	131198	15.1438	16.6767	260.237	39.2402	35.3346	0.949924
2826.05	102.897	16182	-92.425	194365	204245	256.423	123421	6.76587	1.47548	649.157	23.4518	38.7432	8.02035
2828.43	88.0659	17419.4	176.953	180396	215769	178.408	123212	6.48737	19.0255	665.449	24.3633	37.1422	8.65658
2830.81	99.0617	16416.1	50.2047	168335	228112	207.684	121921	6.36442	33.3169	419.714	28.5103	37.6552	-4.75701
2833.2	96.9596	17274.9	-44.2628	181223	222054	255.311	113063	-14.4799	-3.21009	447.093	15.9779	34.9544	6.38914
2835.58	102.255	17894.6	64.7968	181500	223302	178.798	109621	28.3501	13.2484	907.473	15.9561	37.2594	7.77781
2837.96	105.615	17403.6	-82.5016	170929	211357	186.359	142939	35.6703	19.2263	740.852	16.5651	37.2304	2.68219
2840.34	78.9484	16234.7	15.116	174573	231857	162.973	107721	-1.73543	20.1246	797.406	17.3577	45.1507	13.8586
2842.73	96.4515	18287.9	21.0421	172232	232630	211.567	108017	-7.72714	25.8458	386.171	26.8696	41.4047	18.279
2845.11	128.619	18519.7	218.993	182961	219105	148.524	113344	-14.78	42.7486	854.124	13.577	37.2042	4.66747
2847.49	132.15	15863.5	33.4539	176620	215290	215.166	130921	-1.67431	10.3685	364.144	15.089	37.7724	2.59019
2849.88	96.8191	20059.9	-37.0404	160829	236266	178.404	115953	29.5985	19.8356	684.093	23.7026	34.511	2.70979
2852.26	87.7219	15618	-4.1772	169341	241321	190.719	101112	4.3968	27.5541	547.159	28.1918	38.6716	7.03302
2854.64	93.0199	14481.2	39.6973	172649	227224	202.783	118799	16.2994	4.14721	1020.8	21.8004	35.7616	12.958
2857.02	98.117	16093	99.5788	184190	218732	133.426	115146	68.1582	8.26664	377.06	20.8643	47.5144	9.85952
2859.41	105.068	18144	71.1154	177075	212666	208.753	131568	-18.2788	22.3964	951.443	23.9462	41.4307	18.0348
2861.79	93.5198	18083.2	2.33504	162439	218968	210.446	141821	10.9247	22.6108	978.897	9.71135	43.5002	-2.73389
2864.17	102.061	17119.6	-48.3705	173727	219780	190.211	126556	10.4322	6.13169	739.113	25.454	34.4775	0.886425
2866.56	102.406	18306.7	-87.5256	181961	216396	113.029	119342	13.6501	0.832247	987.297	23.2181	43.833	6.21596
2868.94	91.3564	17704.7	8.34757	163202	236419	113.749	114534	16.0151	19.5608	983.6	18.9272	40.8825	4.2589
2871.32	109.405	18378.3	88.6249	162767	236581	188.091	114321	13.1326	20.1195	682.743	22.3332	36.9337	0.445999
2873.7	89.1286	15738.6	46.7826	186068	222356	166.657	107319	5.91763	27.5057	604.755	18.716	38.8752	4.40921
2876.09	94.1376	17869.5	59.6262	173506	216587	138.347	130822	28.7915	21.2472	822.477	29.2565	41.2311	-1.73243
2878.47	111.233	19532.6	22.86	180428	209233	193.888	131059	17.7028	32.5104	856.019	20.9139	40.3345	8.46722
2880.85	115.033	18345.5	47.1507	191365	222843	142.914	96873.7	4.43064	9.14216	628.734	22.2895	46.5695	7.98093
2883.24	108.975	19752.2	15.9521	194102	204593	201.616	119277	22.3518	27.0515	1075.89	29.748	37.2272	4.675
2885.62	83.1784	16372.7	54.2152	169511	225167	125.727	124941	16.8793	-3.10258	475.976	15.5787	38.1621	4.50491
2888	131.563	16485	-100.425	185610	221572	187.615	108523	24.4849	-10.1063	589.853	36.8679	38.958	-0.906643
2890.38	97.3082	17338.5	23.0041	180658	218476	164.563	118814	4.72366	7.14199	859.098	31.0787	31.9688	5.2186
2892.77	114.974	16474	76.7039	173600	224447	117.606	120167	-8.23509	15.3021	662.368	38.9153	37.0413	14.008
2895.15	90.6824	14387.8	93.8209	184753	226032	156.685	104684	49.4861	6.39396	599.266	20.8347	33.2394	25.7277
2897.53	96.5772	15773.9	64.5336	189050	207403	160.942	125997	20.6734	2.24565	725.788	19.1369	30.8184	0.905567
2899.92	104.256	19521.1	54.7589	174175	222173	211.82	120241	-7.97582	15.8282	298.588	25.3899	36.4735	11.7767
2902.3	109.882	21476.8	62.9657	208594	192552	173.517	116694	17.4997	21.3777	804.17	18.8485	39.5504	0.982824
2904.68	101.666	17107.7	-16.5217	187519	217769	184.49	111220	-21.8903	-2.05775	524.606	17.8043	38.2095	14.9283
2907.06	103.024	20706.2	70.4256	174636	207468	184.741	140548	11.1927	8.66386	749.542	36.3744	29.6747	-6.48614
2909.45	93.7824	16621.7	133.964	172091	228938	202.976	115029	21.8546	19.9325	706.128	21.9904	41.9511	0.516848
2911.83	93.433	16917.3	-10.3552	172328	230180	171.08	112761	-7.89134	24.0716	695.287	32.1015	41.3081	-4.39945
2914.21	98.7782	15595.5	63.6926	172639	230747	165.067	112977	13.0511	9.23712	336.679	31.2237	35.2932	2.60078
2916.6	94.8592	19142.6	174.926	179118	220830	185.003	115526	-14.9948	38.2552	676.498	28.6187	38.4573	-0.876019
2918.98	114.765	15226.9	97.4227	166841	230627	176.463	121076	6.32025	21.0464	559.851	20.8202	32.6369	-2.72504
2921.36	103.301	16342.9	-103.05	158451	244687	111.583	110461	28.1035	3.68078	187.837	19.1189	42.9963	9.50463
2923.74	92.6595	16328.3	91.8747	195042	200410	125.601	128050	-1.67033	13.5181	744.608	20.4884	39.5941	9.76156
2926.13	112.917	16558.6	28.918	174917	215622	136.587	131664	-9.56353	3.88974	887.196	29.0101	41.2974	2.79756
2928.51	109.564	16281.8	183.258	178364	223467	186.817	115039	64.6135	35.3722	788.693	27.8948	34.412	5.35786
2930.89	88.5583	15741.5	117.687	177920	222848	189.967	117394	-1.67081	19.8958	687.004	30.857	34.2639	8.0259
2933.28	102.603	15217.9	34.8363	170004	232252	166.575	114595	4.47555	23.9426	373.211	18.0569	43.0744	-0.799702
2935.66	95.9376	17117.8	20.6641	167396	234227	94.7746	113361	5.6545	7.74229	369.477	26.7369	38.6023	8.84574
2938.04	104.585	19074.5	72.1721	164893	223124	145.619	132071	-7.70016	5.20346	15.3138	17.7498	38.3977	2.7092
2940.42	123.619	15289.1	67.2417	191154	210886	115.479	118404	19.595	3.4997	596.194	24.4503	33.918	-0.724966
2942.81	101.423	17709.5	65.2301	188844	205214	199.853	127822	28.3196	20.916	575.803	17.5697	35.2197	4.41448
2945.19	110.166	19148.5	15.1653	180663	210599	202.583	129289	-9.1004	-2.48296	651.961	16.6965	35.4352	6.13338
2947.57	92.0223	16229.9	89.8308	185014	224728	179.492	104190	-1.62035	9.88314	1053.94	10.777	36.1575	13.4225
2949.96	86.1205	18540.5	47.058	173733	226548	213.868	114811	-16.7991	18.7522	660.86	22.0371	38.7446	4.4744
2952.34	103.764	16396	67.1417	183817	222665	155.049	109187	-17.0734	28.8844	671.641	20.6654	41.9642	-8.33057
2954.72	107.153	18699.9	-78.0262	173303	218876	164.03	127143	43.4847	6.59747	579.412	21.9059	35.2899	6.64015
2957.1	79.1765	16916	77.6676	171537	231668	130.369	111558	-1.62128	11.3496	632.554	24.2595	41.2874	19.9408
2959.49	81.5344	15746	-91.5509	178260	230446	231.12	105806	-1.52672	12.0444	414.151	20.4821	37.3292	2.54371
2961.87	100.638	15859.7	141.872	170715	231306	147.815	114220	27.3994	28.0967	481.974	24.321	37.5785	4.28921
2964.25	99.6749	17528.8	133.26	181625	209240	185.954	131535	13.262	25.5293	571.69	19.9528	34.9804	9.55352
2966.64	103.245	17671.5	9.27279	169199	222202	48.6058	128066	4.47186	6.26553	1202.48	15.3877	40.3303	8.07888
2969.02	117.818	15979.4	132.788	171008	222811	166.473	126350	13.8617	9.82457	858.347	17.3539	42.0618	9.54092
2971.4	91.5284	16966	15.016	165285	229636	115.614	122949	4.27859	10.6666	847.191	23.7816	42.3942	-12.5568
2973.78	76.6834	18541.2	2.94845	197070	215583	155.428	100109	-9.4274	16.2357	716.188	24.2896	46.3008	9.97126
2976.17	97.9381	16626.7	-15.4506	160026	233410	122.258	124558	-13.1983	14.2937	915.43	31.7649	35.8194	16.0585
2978.55	116.982	18066.1	-57.2509	183988	219071	135.599	113059	12.8173	11.8379	570.774	20.0794	35.4012	-1.52952
2980.93	106.098	17874	72.0413	174914	224662	149.444	116422	20.9425	14.3159	947.198	32.0239	37.3459	7.94532
2983.32	105.816	15884.3	14.7661	172835	230279	138.298	113231	-7.28997	36.5674	329.409	25.7221	42.0739	-5.66497
2985.7	92.3792	16658.5	59.1537	165650	235982	146.626	112872	50.7513	21.3981	884.079	20.2785	41.0484	-11.0775
2988.08	87.0567	17224.2	50.4443	184175	221638	115.301	109448	12.727	44.5096	732.244	19.9295	47.106	-10.5571
2990.46	107.548	16801.3	-35.0557	196084	197882	131.123	130002	-1.63097	6.21698	935.79	22.9093	36.5391	16.7757
2992.85	111.391	18322.6	45.2509	175583	217689	188.262	126068	10.0377	21.1959	613.114	19.4378	33.2823	6.83144
2995.23	81.6208	18584.2	34.5551	177852	217285	186.779	123085	-25.7984	31.257	1009.91	26.2137	40.8963	7.99629
2997.61	100.698	20480.5	16.1392	174502	219633	55.8281	122751	13.9246	16.3462	478.61	24.4276	31.7501	20.8531
3000	101.493	15143.4	-63.9267	167388	228920	129.965	122821	4.70539	15.8191	1053.38	26.9761	39.604	-0.759738
3002.38	81.9329	16133.9	66.0053	168651	219556	101.58	134515	5.92037	17.2379	890.489	22.5424	36.2955	20.1525
3004.76	82.1669	15943.6	-21.6393	180722	222594	185.402	114027	45.5667	7.45349	585.141	37.1595	45.3689	-3.66577
3007.14	96.1433	17749.6	-9.4836	175543	216630	229.903	128067	-16.5772	-10.5731	981.472	25.1337	39.6944	-5.8829
3009.53	112.33	16688.4	-26.9313	174014	230135	165.889	110829	-12.9597	28.2001	641.375	24.7883	34.1507	0.570426
3011.91	99.6344	17045.1	114.645	162315	236964	194.429	115322	-9.52217	11.9484	1028.36	28.0989	33.1106	1.0815
3014.29	105.373	19264.4	9.31384	177467	220064	127.047	119278	20.8153	2.798	419.814	15.8305	38.7699	-2.41483
3016.68	97.0421	17435	73.2846	184455	217930	168.62	114592	15.3487	21.4408	593.829	15.6646	32.5057	10.69
3019.06	105.207	15984.1	26.9347	169983	230434	125.978	116394	-1.53021	28.3175	699.414	26.4961	39.0994	10.9258
3021.44	93.9253	17222.3	107.182	149220	243152	169.282	123810	4.06969	27.3799	568.801	21.7168	33.6677	0.965365
3023.82	97.64	16332.3	45.6655	212129	196674	164.761	110878	4.27598	4.12896	540.942	22.8117	41.8839	16.1441
3026.21	104.227	17900.2	48.007	188898	213530	201.486	114786	-13.8804	-11.7783	726.715	28.2803	44.8756	8.13692
3028.59	122.803	15410.2	81.593	207934	194803	130.171	119897	-1.53826	15.6312	928.93	26.7026	32.4004	-0.654412
3030.97	99.4839	15662.1	-26.6264	182251	227348	114.614	104891	5.58113	11.2579	764.284	22.993	41.5475	7.53801
3033.36	89.4341	17629.1	-15.3443	171118	225877	168.422	120291	22.0136	25.3374	642.286	33.8488	42.9149	21.8642
3035.74	111.766	18582.4	68.7174	184258	211039	142.53	124469	12.766	10.8891	419.611	15.1279	38.3963	2.65605
3038.12	84.8435	18533.4	3.08091	177453	219967	162.632	120093	-8.72664	11.8943	497.328	26.5875	42.1949	7.66271
3040.5	107.604	17430.1	105.833	185702	211207	133.694	122919	-1.62609	17.5632	866.264	30.0432	34.365	18.7776
3042.89	93.1212	18055.5	85.1881	182020	206877	184.77	134391	-21.7095	20.1637	384.683	23.6101	36.3321	6.2926
3045.27	91.9372	17208.4	-34.0956	158177	233128	141.6	127598	4.3795	16.583	168.24	37.5509	41.6992	11.3687
3047.65	129.24	16889.9	110.066	171227	221185	165.335	128060	11.0671	3.51484	427.083	32.1291	50.8871	7.57624
3050.04	100.669	15526.4	27.119	172867	220219	120.943	128525	-7.25599	9.57105	773.379	27.2972	42.0481	9.30252
3052.42	95.2534	18633.8	112.352	191921	207691	151.092	118994	36.7329	13.1745	549.626	30.0533	42.3901	-1.55357
3054.8	75.6569	17720.3	-25.1891	195797	204633	157.432	119473	9.36202	18.8906	570.108	69.4699	40.0195	4.08078
3057.18	106.528	18193.6	-14.9066	169691	228028	128.012	118479	12.9314	11.0316	611.354	21.814	40.487	-2.29309
3059.57	93.55	16994.4	64.8962	172838	234238	156.004	105548	20.1267	15.4327	865.079	18.8039	32.6927	4.08056
3061.95	90.216	16925.6	18.8969	173141	221336	145.854	125003	-7.74508	24.0494	871.274	22.8994	35.1111	17.1606
3064.33	134.882	16656	-40.8667	173886	229333	148.101	112194	10.5106	22.1699	678.813	24.532	37.2956	5.02612
3066.72	93.1157	14539.5	55.0949	189864	212158	106.503	118906	-1.45545	2.61694	709.494	22.4117	40.0036	5.79055
3069.1	110.472	18779.8	-34.5095	166548	230816	182.745	117412	34.7378	29.4277	1050.56	30.5027	33.3634	2.85062
3071.48	100.179	15705.8	72.3072	171722	232626	136.064	111022	-1.45032	21.5354	583.178	28.5683	42.7442	4.19108
3073.86	112.523	21318.1	133.022	186114	207786	146.887	123947	6.11877	-3.48734	715.035	19.8866	43.1023	19.0089
3076.24	106.886	17278.5	15.6727	177112	217153	162.172	125632	-1.54542	16.4068	907.288	23.8575	39.5716	6.17455
3078.63	112.357	16948.5	-40.1472	179377	220242	137.348	118189	4.3948	-3.82746	995.169	23.3057	35.3272	-0.62167
3081.01	123.662	19070.5	52.6834	168337	234460	147.225	109330	-8.9183	32.9005	794.703	26.1825	32.4979	16.3961
3083.4	110.528	18058.5	-38.3824	176826	212505	154.359	132561	-15.7474	13.6217	805.051	21.5001	37.7935	1.05417
3085.78	114.428	18069.4	99.0736	177822	218501	182.919	121922	10.5961	18.9392	663.933	21.273	37.8529	20.4689
3088.16	103.597	20143.1	10.4613	186967	210780	159.165	119545	-8.10042	22.509	657.769	22.4046	46.4517	12.3026
3090.54	99.5452	17839.8	116.441	196727	207842	97.0036	112801	-25.5942	21.5366	925.585	31.093	28.6165	2.85014
3092.92	125.027	18800.3	-27.5189	193978	201703	169.875	125035	10.3246	30.2937	876.717	23.2254	48.2206	-7.45495
3095.31	108.737	16424	189.971	184410	220945	159.52	110545	9.70957	28.4866	932.563	21.0554	43.7819	9.09605
3097.69	69.101	17522.8	20.3955	178429	225577	143.817	111061	20.4716	31.8627	596.245	19.8733	35.7852	4.18413
3100.08	96.7038	18533.3	49.8492	179623	219655	150.928	117263	12.47	20.864	804.236	21.7798	40.0318	12.2886
3102.46	87.3598	16083.8	21.0176	175402	234854	114.614	102519	12.6053	-1.35817	431.263	23.5971	48.3349	10.7999
3104.84	122.348	16353.5	3.49232	161639	237714	175.785	115747	10.1084	22.2355	1120.56	19.4561	37.9806	9.47569
3107.22	97.0445	15670.7	-2.47859	182433	213116	126.329	126448	9.8221	27.0084	669.413	14.1385	42.9543	-7.07366
3109.6	102.385	17056	118.637	176035	209955	161.565	138148	-1.58986	3.8936	961.63	28.204	44.2267	4.68419
3111.99	117.623	15516.7	-104.258	190564	207854	137.72	123682	-1.48935	10.9631	753.473	18.3778	37.7201	6.87222
3114.37	120.845	15935.8	41.5488	177728	222764	133.538	117410	28.6418	21.1982	931.064	32.9765	42.8733	11.6056
3116.76	87.8312	17853.3	21.0904	169487	233516	231.415	110498	-1.46079	21.0932	703.66	19.6313	36.523	20.5499
3119.14	95.2463	17073.8	37.9361	172694	232885	94.3029	108250	5.46136	15.8278	404.484	17.6806	37.5787	10.594
3121.52	126.596	19140.7	15.4441	165993	223853	181.762	129134	-8.60791	20.0138	289.576	34.3349	38.6108	-2.197
3123.9	111.137	20526.9	-8.75432	165605	228055	206.394	121883	10.3568	8.06519	321.187	33.3002	32.5088	11.4364
3126.28	98.9001	16639.6	-18.8365	146572	248868	76.9282	119434	7.45288	6.75739	576.432	22.9327	30.9049	7.126
3128.67	90.4416	16526.4	3.50462	179438	220681	165.084	118230	9.81488	5.84733	504.521	26.0012	41.5727	-3.78969
3131.05	100.838	18606.1	113.421	184326	210754	98.9794	124569	13.0835	26.5405	635.492	24.4627	42.2358	-0.55523
3133.44	113.997	16744.7	9.70566	166819	223219	112.732	131130	5.75352	8.33361	575.49	15.3394	37.9267	-1.38612
3135.82	97.2653	17464.8	-37.6348	171385	224288	215.564	122675	9.80709	17.5204	485.726	18.0525	43.3656	17.331
3138.2	119.629	17096	35.023	176620	211991	131.079	134708	-1.54339	6.20798	535.371	18.3372	44.1214	-0.561475
3140.58	117.079	18867.4	-8.09476	178767	223129	129.921	113033	-1.43388	36.3806	605.404	17.8292	40.24	6.69752
3142.96	95.3855	20618.4	33.9058	172776	218385	203.382	126312	-8.72401	25.3948	947.537	26.6892	35.6687	6.13692
3145.35	88.5424	16298.4	85.1634	169067	229903	127.567	118394	-1.43671	10.2472	391.246	26.5191	41.6748	10.7472
3147.73	109.054	19683.5	137.909	171628	214512	180.495	134550	10.1735	5.13519	955.899	24.4622	38.4348	2.82909
3150.11	104.797	15300	55.1577	175289	227140	139.016	115362	10.6817	17.1251	192.316	20.509	33.7813	-0.562437
3152.5	100.116	15432.3	-2.25909	176679	227413	177.48	112220	19.8402	25.3846	1003.36	18.2074	37.9257	-3.79505
3154.88	101.494	20190.6	93.5026	180329	230957	94.0115	97605.5	4.25818	25.6076	605.181	33.6784	41.7286	4.43622
3157.26	101.003	18235.8	-58.7779	172858	220177	202.052	126089	-13.5388	15.3316	711.184	20.9183	38.9417	9.40602
3159.64	113.538	19618.5	86.5206	200460	203429	173.935	112676	-13.7147	1.95855	995.197	29.7413	35.7681	2.95819
3162.03	92.1715	16558.9	36.8024	171236	229493	136.244	115524	35.9494	8.01106	762.106	20.9411	33.3329	-2.36632
3164.41	99.1194	16050	115.895	167782	229157	225.844	121305	4.20422	25.2649	450.936	22.0885	35.3677	12.9426
3166.79	118.979	18859.4	18.2093	185224	211212	135.437	122427	-8.31232	21.1409	698.996	18.8845	50.0547	10.8645
3169.18	99.568	18041.8	150.035	165134	226940	197.157	126391	-1.62283	29.3782	403.822	24.7967	34.9758	-3.76327
3171.56	100.049	18658.5	108.931	175683	214140	144.725	130983	-8.90152	15.1157	681.686	12.295	33.417	11.4155
3173.94	105.552	20704.7	85.3201	169231	225356	123.657	120752	4.45903	24.3894	497.062	27.6167	43.0604	-7.86473
3176.32	130.762	18970.7	110.286	179489	221347	172.651	113741	17.4123	27.8598	1402.22	29.2519	35.8576	-4.21203
3178.71	100.225	16851	56.0993	169307	225047	124.293	124771	6.18143	-7.40001	636.019	26.0262	40.9097	3.04473
3181.09	113.764	17654.5	-27.7123	166365	233189	166.838	115135	13.6735	12.6613	1075.76	23.7989	37.548	4.74367
3183.47	102.456	18176.9	188.029	161063	208031	130.659	160392	23.5313	24.5912	683.797	15.7136	41.3706	3.08429
3185.86	107.063	22779.2	67.581	172514	223405	336.338	117057	44.0131	14.5697	523.738	27.1536	47.078	11.7441
3188.24	97.9019	16095.2	42.8672	196473	208240	104.189	114886	49.8475	23.6594	173.43	31.0509	36.3148	10.1518
3190.62	110.163	17892.8	44.5523	198979	205601	180.804	113375	-9.64267	2.59618	635.477	43.0853	39.5228	5.00371
3193	123.768	17107.3	51.3111	181972	216190	132.386	120488	38.4634	23.5776	1050.15	26.8683	40.4477	-10.7155
3195.39	95.3206	16411.5	178.527	183760	214448	116.513	121824	-20.1044	15.3182	572.621	28.4869	39.2462	-2.29969
3197.77	125.946	19179.1	17.2008	149780	243802	107.913	120280	-9.30719	15.3487	613.541	22.441	27.2002	-4.08622
3200.15	117.263	16075	81.5372	178528	229175	96.7689	106729	-7.72428	26.0935	610.843	33.6081	41.7257	-3.62121
3202.54	97.1983	16432.3	149.793	177301	225201	147.947	113799	-13.6524	17.4425	854.865	27.9308	39.6143	23.9625
3204.92	101.824	15956.2	104.463	196262	209201	157.575	113134	46.2502	32.12	797.478	26.728	48.5712	1.31646
3207.3	107.314	20446.1	42.43	179545	208200	163.5	132677	36.5168	27.246	1154.12	22.9311	38.3961	-4.00974
3209.68	82.8352	16267.9	-38.8179	165653	229377	113.505	123870	-1.48434	-9.78626	581.937	16.3283	34.5576	2.90912
3212.07	124.361	19338.5	218.751	178387	210604	187.111	131682	-19.4243	28.7645	881.709	29.5524	44.4962	-2.60575
3214.45	109.153	16992.2	-56.0988	171467	221876	102.739	126669	11.2731	4.17143	660.218	28.8301	36.1681	0.87636
3216.83	95.7834	19118.6	-29.0321	171965	222027	173.571	123621	4.80661	25.1809	678.713	19.6856	42.9352	-2.36847
3219.22	88.9186	17008.3	121.48	170597	236007	142.959	106300	-14.0192	6.01355	395.893	10.3053	36.0608	-4.08601
3221.6	107.786	18160.3	-49.4572	163995	230138	194.103	122595	-1.63044	5.73705	1017.45	29.8263	38.9958	5.55277
3223.98	113.419	17105.3	-68.8061	184555	216339	134.643	116718	15.8956	21.4952	1271.39	22.6431	51.1767	29.0095
3226.36	72.3817	15931.9	22.2632	221526	196805	70.7509	98436.9	-1.45387	18.4908	647.254	16.0659	33.7441	9.12903
3228.75	111.387	14907.2	137.717	163280	245187	147.005	104041	-9.12583	10.7254	445.325	26.3035	29.547	3.0321
3231.13	93.2356	15779.7	74.2408	180596	218136	176.988	121337	-1.52736	41.7594	307.961	30.5819	36.9155	-0.471169
3233.51	87.9685	17883.2	-34.1605	170745	224912	114.101	122184	72.3577	20.2028	530.767	17.1222	33.6711	0.85731
3235.9	81.3496	17298.9	34.3037	164525	236243	225.635	113226	-15.8623	31.3363	1092.74	28.604	35.0191	-5.43097
3238.28	111.195	16814.7	23.9076	163443	251754	205.376	91825.6	29.3811	8.45495	613.016	19.8088	37.2831	8.44905
3240.66	93.8718	15770.9	4.63455	186464	207396	127.698	128577	-17.4335	21.8091	1856.21	22.9683	34.3579	14.1425
3243.04	91.3931	16962.4	87.8215	184050	220480	105.139	111486	16.8672	21.5966	845.537	31.723	37.2566	15.4597
3245.43	110.013	18839.5	-74.7867	183303	223763	83.0666	106168	30.1025	10.1813	505.169	27.4228	44.1046	-0.475312
3247.81	97.1776	16912.5	-40.4894	178348	223603	189.93	114445	16.9383	12.847	948.504	30.117	37.4091	13.7517
3250.19	94.6196	19737.7	-67.4865	190586	197412	174.342	135754	-9.41486	25.6092	480.127	19.2127	45.4382	3.15506
3252.58	94.3243	18826.1	62.3944	173303	236297	111.037	100029	-13.8359	23.1308	907.242	18.8234	43.3732	9.74503
3254.96	87.3815	18873.7	10.3132	168368	237610	83.4669	104509	-7.20157	23.0577	1147.93	26.559	43.3327	-1.25364
3257.34	79.442	16554.6	68.5955	186778	222524	99.4747	105140	29.1102	0.0759495	844.568	20.4774	35.79	6.62205
3259.72	88.133	16469.6	-1.73707	185341	219523	171.376	111963	13.1604	1.93974	654.8	12.1367	36.6033	0.84088
3262.11	112.425	19935.7	141.936	173651	220854	177.944	122322	21.8994	39.4992	397.581	34.9825	40.3263	9.92212
3264.49	112.696	19789.9	72.7245	184637	202429	116.265	135667	14.6155	22.8716	727.105	22.6079	39.1325	7.96067
3266.87	93.4769	15885.8	-78.6285	184734	213998	145.007	122367	-1.52441	12.3052	152.06	17.034	30.0919	4.86709
3269.26	107.861	15867.8	-39.7288	169524	227641	96.2734	121473	4.55462	38.7595	717.82	19.3983	37.6605	10.0582
3271.64	90.8525	17354.9	-14.9227	172861	218368	165.518	130032	-1.56049	8.60695	338.455	22.7638	36.7044	8.619
3274.02	99.5099	19354.2	51.2334	179159	221991	134.67	113734	-1.57409	8.69045	607.864	31.0081	47.9895	5.50152
3276.4	107.473	15206.2	52.9752	174920	223145	115.436	121563	6.57012	15.2594	755.378	20.062	42.8833	-6.12897
3278.79	106.049	17755.5	71.0402	178147	214274	197.254	128243	14.266	5.14499	729.717	29.1833	34.6379	-0.437877
3281.17	97.8938	17470.4	-22.0068	179394	219731	209.407	118929	-1.59905	14.0031	389.422	29.7474	38.0202	-7.89262
3283.55	106.329	18796.2	-41.7644	177067	224754	136.848	113183	11.1891	19.9565	385.064	9.65347	31.3421	5.0878
3285.94	97.0382	17255.3	32.0737	204672	201861	225.143	111906	14.5882	33.6762	725.083	19.8114	42.9594	-8.37686
3288.32	105.225	17072.8	-20.123	184087	214411	150.77	120910	28.1025	27.9206	585.633	21.0012	39.499	8.12721
3290.7	74.8013	18827.1	43.63	166875	219910	94.8252	133872	-1.52858	31.6978	832.958	17.1939	39.3317	19.2217
3293.08	110.56	17236.2	-1.70151	179906	204339	137.923	141728	63.0851	11.9677	619.777	20.6957	35.3722	5.16528
3295.47	98.2744	15273	-51.4181	178785	219812	125.4	121962	-7.43479	22.455	263.336	16.5653	34.5621	15.0853
3297.85	102.229	18106.5	55.5474	177022	211746	157.046	133594	6.09606	14.1517	464.325	15.1621	38.5984	10.1114
3300.23	94.5591	19015.3	131.78	167755	219755	164.828	132657	4.81314	16.4053	735.557	13.2436	40.8748	1.42425
3302.62	89.3354	17062.4	-20.2224	166986	228299	153.959	122892	-1.4672	6.75806	552.005	18.2359	30.6625	13.7986
3305	110.172	16956.2	12.0923	182112	224243	171.694	108109	23.0602	8.50991	1119.32	32.1624	38.7517	17.6055
3307.38	84.7839	17543.2	38.0985	185262	214004	101.006	119091	6.35335	24.3326	1055.58	22.9082	38.7275	10.5415
3309.76	100.283	18438.5	198.801	162503	237730	257.372	113074	-1.56991	36.3194	261.515	18.2028	38.2428	6.96787
3312.15	87.5068	15118.4	17.8124	183825	212257	108.99	126088	-1.51302	31.0937	1028.69	13.6518	41.7687	7.61176
3314.53	112.827	18728.5	88.0522	178670	218904	125.54	119704	-8.21981	1.17038	611.043	17.4008	32.7184	-2.31854
3316.91	105.44	17053.6	86.7772	193525	207525	115.112	118460	-9.72285	12.0497	832.968	24.4615	37.0838	-7.90812
3319.3	78.672	16203	-38.9693	191400	213967	118.625	112731	-8.95187	26.8601	554.3	25.0527	33.5906	-9.00639
3321.68	109.689	15630.2	135.79	173529	232888	185.242	108125	-1.53104	7.10324	599.376	21.7726	40.0539	8.63691
3324.06	103.694	16612.2	34.9421	180752	220975	147.856	115614	24.5491	19.1251	738.715	22.3983	46.1365	21.7878
3326.44	95.3807	16137.5	-76.8893	179452	223192	188.604	114668	72.1806	13.2044	585.815	14.5173	38.3175	1.49305
3328.83	110.232	18494.3	12.4604	167033	232459	212.018	114530	-8.32404	20.9417	1008.13	33.636	31.9163	10.6909
3331.21	95.6386	18526.1	-49.9054	176545	221821	164.675	118099	-18.1552	12.7942	996.995	20.2303	41.7399	-0.396352
3333.59	138.684	16062.1	69.412	182717	217733	161.003	118129	5.13281	14.2098	1022.84	29.3467	40.9242	-8.23419
3335.98	91.4274	17138.6	70.0094	163663	222309	186.557	136113	6.25105	11.5195	755.397	16.3685	37.1614	24.7128
3338.36	111.256	16877.5	5.36986	184709	217288	224.941	115402	39.1001	45.8288	938.807	24.4791	43.1916	-2.2591
3340.74	118.611	15165.3	75.1577	171216	224283	284.395	124938	15.0424	22.9985	444.671	22.2523	41.4314	1.53422
3343.12	108.269	17476.1	71.8238	173432	217559	194.39	129957	14.3707	24.5111	589.264	21.2564	40.7659	12.4865
3345.51	97.4448	17171.8	50.6093	185627	212899	168.101	120488	29.5542	35.8127	1096.61	23.3609	32.246	3.22689
3347.89	107.959	15619.2	-7.32587	195690	215030	144.832	105606	21.9293	30.3855	690.847	13.735	37.9118	-2.01576
3350.27	97.4535	17199.7	118.341	179435	222662	192.95	114049	-8.37809	6.06017	885.185	23.4537	42.2229	7.39643
3352.66	99.0428	16146.1	-7.84021	182849	224343	167.246	108264	11.0367	1.63728	641.928	23.6104	43.4231	-1.25798
3355.04	95.4102	20815.4	-22.1796	174412	220444	189.51	120437	11.6737	8.61943	1386.63	18.4316	40.6629	1.54532
3357.42	103.953	17797.5	75.0474	166611	223207	154.935	130321	13.7338	9.83691	543.215	23.7242	40.9273	1.41785
3359.8	110.568	18348.3	106.324	189916	210288	143.283	118029	-1.55718	31.9768	533.167	30.7634	38.2096	12.6405
3362.19	98.3439	19054.3	-76.2908	177929	211296	184.115	131872	-1.57778	4.83084	919.976	30.0462	42.6974	1.52676
3364.57	101.779	18865	32.0923	177986	205830	137.288	140628	-1.5418	14.3984	487.462	19.5032	45.0273	12.5389
3366.95	86.1966	15529.4	106.734	162223	234534	166.228	120771	-1.46648	27.276	875.891	35.6569	38.6109	13.6893
3369.34	100.845	16634.5	36.4142	180200	214413	217.203	126220	-8.93764	-5.12034	922.262	29.2759	42.0059	1.40963
3371.72	102.683	16462.9	-7.41703	185784	220012	181.793	110182	6.06221	1.57731	1118.63	8.21621	44.6327	-5.51557
3374.1	105.815	19192.7	87.6171	184684	221178	144.796	107805	18.762	4.49672	404.55	14.2704	39.6951	-2.06736
3376.48	116.209	19691.3	-39.2268	177705	220460	103.454	117436	-25.7869	18.091	1092.76	11.7357	31.8489	-5.5768
3378.87	100.533	15627.6	4.49166	167798	232221	99.1654	117188	24.809	-5.69682	532.736	12.0762	34.3476	5.74454
3381.25	113.067	16470	80.0382	179590	232967	158.615	98826.8	-8.8995	12.5283	918.877	19.0856	35.7301	-12.3597
3383.63	110.394	15336.6	143.06	176554	223822	187.624	117773	22.5482	6.84153	1000.22	20.0097	45.389	8.34377
3386.02	100.504	16182.7	87.9781	169128	230054	173.018	117248	-1.3626	15.0825	1368.54	22.135	38.7314	-5.19682
3388.4	103.619	16465.1	10.7428	174360	219484	132.077	126862	15.4634	34.1069	590.65	26.5748	36.1342	2.95213
3390.78	95.7324	17398.8	152.012	180251	207290	157.347	136435	-15.4272	17.6592	702.702	18.7863	36.0569	-0.278308
3393.16	105.289	19636	125.16	189024	205827	141.825	124542	-7.12398	24.9034	847.182	20.7913	31.9803	11.321
3395.55	99.3951	14829.9	-46.9256	179802	219971	182.735	120408	26.2074	16.8286	580.35	10.6198	38.8426	-6.61786
3397.93	94.4239	17410.5	-18.0413	162095	230422	109.854	126073	15.0998	14.1013	382.267	18.2452	32.7279	9.2004
3400.31	118.733	16023.3	41.57	161151	236588	163.55	118861	5.87613	8.03228	650.235	24.2961	34.5089	16.4842
3402.7	124.869	17011.5	70.2065	170780	226667	203.842	120099	48.0611	28.814	472.811	21.5277	35.9014	6.85039
3405.08	95.1327	15653.5	5.01449	175030	227084	140.132	115175	26.9225	13.6809	559.504	23.6356	32.7825	-1.89592
3407.46	114.403	16342.3	124.695	164698	233394	148.652	118910	10.0821	-3.04454	289.073	25.5328	40.9198	3.03514
3409.84	87.3137	17271.7	-30.9898	175636	224836	148.225	116190	10.1503	25.8946	663.139	15.975	42.2666	6.38099
3412.23	87.4308	18858.9	74.5023	179770	208558	125.834	133731	-1.43196	15.5136	828.023	17.5188	40.7518	6.66245
3414.61	92.8924	17869.8	31.1322	162993	233805	116.086	119133	35.3204	28.041	388.759	17.8571	38.3977	13.8651
3416.99	121.233	14200.1	-0.849307	171135	222853	205.276	128224	-1.39912	9.08006	601.135	18.7964	29.4532	-5.35447
3419.38	95.339	20118.8	38.3318	170886	216604	166.343	131988	-17.124	13.1464	1083.49	25.2612	36.8504	10.0949
3421.76	95.5126	16214.8	127.112	174172	222814	163.758	121824	-8.67112	1.55668	972.125	21.9018	38.4193	3.10606
3424.14	100.482	15502.4	88.8786	161813	233701	155.682	122680	-7.58795	32.4644	844.36	27.3549	37.5603	5.03889
3426.52	92.2361	15137.7	30.268	194961	212852	167.531	110537	-1.41035	14.4051	530.892	17.3263	30.3325	-0.256597
3428.91	97.6717	16416.5	49.0295	176254	214414	163.376	132089	-16.3157	1.12156	608.964	26.5888	38.4555	3.18376
3431.29	94.3001	14347.6	-101.331	162655	238570	140.546	115412	40.6727	4.01012	866.8	21.747	32.0674	10.1516
3433.67	91.3432	16199.1	-52.3796	180438	215537	179.088	124448	-13.802	15.4398	1268.18	12.7627	43.2611	-14.4959
3436.06	115.549	16962.1	82.5131	183503	210082	172.665	128387	13.8795	-2.75657	507.535	25.621	42.4129	-3.34874
3438.44	120.055	17195.6	-27.1703	186842	223886	195.62	102414	-17.2706	18.8169	787.411	14.8287	41.6008	3.38153
3440.82	97.64	17928.7	239.049	179218	222391	247.699	113863	6.64918	-11.3136	881.669	19.0962	39.2481	18.6454
3443.2	85.7988	16149.3	16.9723	176492	222293	149.792	120161	19.7828	19.031	429.587	27.4832	33.43	-3.47332
3445.59	102.749	18717.4	5.86846	170249	231569	167.145	111878	-14.1733	21.4336	504.14	21.1355	38.5333	-2.08046
3447.97	106.701	16378.4	84.9634	171605	227705	180.776	117804	-16.012	24.4602	805.836	27.7513	35.0331	11.586
3450.35	87.5397	19412.6	63.553	194256	208542	132.7	114176	-15.2712	27.3404	281.75	23.3264	41.7419	-0.217415
3452.74	103.549	17470.2	-19.7879	161873	226918	182.34	131512	-1.43267	11.8501	504.14	24.5929	35.0411	-5.50504
3455.12	93.8772	17754.5	-0.700404	188826	206014	212.514	126270	-14.5207	35.4472	1020.31	28.0584	41.3091	7.24707
3457.5	98.2611	16121.2	47.2273	188481	221762	171.393	104459	10.0995	11.5906	769.138	7.802	27.8459	4.73453
3459.88	102.549	16291.8	-13.5078	176944	228653	259.131	109220	-1.44565	-2.2648	887.835	16.2009	44.6258	8.65351
3462.27	104.64	18308	201.069	175862	224364	174.318	115504	10.6481	26.6551	421.148	19.2547	39.1918	6.73512
3464.65	109.951	16700.3	109.686	172711	219984	196.229	127991	-1.37365	8.13814	560.881	20.777	28.8049	11.6209
3467.03	109.187	16928.7	-110.724	172436	221898	226.976	125524	23.3455	-0.790373	452.914	24.1513	40.2848	5.1402
3469.42	101.6	17658.7	18.9685	173966	218303	119.727	128279	29.7173	3.18497	354.827	24.2909	40.5201	5.62219
3471.8	95.6394	17233.3	106.592	192273	205586	213.258	123121	28.7504	13.6715	479.594	12.8898	39.48	8.48591
3474.18	105.631	16356.8	52.2176	177749	223740	169.511	115783	32.3245	23.8882	590.512	21.05	35.6455	15.9715
3476.56	109.013	19204.5	57.959	184226	199742	232.165	141127	-22.1872	9.13734	454.413	20.7306	39.8451	8.7561
3478.94	117.176	16251	-55.8941	179210	217020	230.124	124025	-1.37373	3.01323	905.625	21.2815	38.5429	-0.199702
3481.33	86.6956	15237.8	47.9068	180587	212857	199.886	129453	-8.58601	27.4442	890.306	19.2921	40.8606	3.14519
3483.71	118.839	17930.7	-13.18	172539	227612	217.811	115449	10.7435	17.1804	581.596	10.8499	44.8955	5.05903
3486.1	101.726	19371.7	37.4365	175228	221688	202.766	119504	-1.40765	19.0228	539.363	20.1519	42.9667	12.0109
3488.48	95.5577	15615.8	-18.1528	164446	233570	225.747	119482	9.9882	5.60355	650.027	16.4454	40.4146	1.44761
3490.86	110.179	16817.4	134.153	175454	226174	181.245	114723	-9.09231	14.8911	527.23	22.1628	39.5748	5.11132
3493.24	109.139	18409.9	111.867	186757	209952	170.086	122382	17.501	35.532	890.698	23.7376	37.5568	5.2721
3495.62	96.0093	19265	12.1019	192573	211208	135.073	112273	-1.38999	11.1972	592.151	30.9136	34.4589	-0.185542
3498.01	100.374	16916.5	48.4636	183947	217402	229.561	116455	4.48963	1.60247	728.889	25.2315	34.1732	9.93538
3500.39	94.3322	16247.8	90.875	184038	211785	221.536	125203	-12.9913	9.02798	1101.97	22.6704	34.0343	9.89718
3502.78	92.3216	15780	43.9443	179977	215450	143.993	126123	6.17033	34.5347	540.254	25.2993	40.2232	10.3033
3505.16	90.9552	17344.3	11.392	199982	199889	139.555	121632	-8.31461	23.485	373.624	15.5394	38.8334	4.69151
3507.54	97.3691	15681.8	36.1552	178956	212832	178.376	131545	-12.9839	8.10008	631.626	25.1175	45.6872	-10.2373
3509.92	107.754	18300.4	122.062	169047	212555	266.662	142628	57.0718	24.6402	517.278	24.4283	44.4243	5.4456
3512.3	102.747	18728.5	-54.9064	187066	211788	170.991	118963	-8.59684	20.1275	1042.67	26.69	35.025	3.18557
3514.69	103.404	17333.1	48.3076	182324	208060	254.112	132361	-1.34111	13.1998	893.89	15.2749	34.8036	3.19252
3517.07	113.061	17251.1	35.9816	187559	216493	169.887	112665	16.0205	28.366	721.256	20.8962	40.5629	-0.157368
3519.46	104.913	17915.9	47.8457	179836	214602	187.124	125443	10.1865	2.04945	624.799	15.123	38.4862	16.446
3521.84	100.442	16923.7	-0.25922	176001	231560	99.2187	105981	-19.09	20.0236	431.445	25.5072	40.8918	6.6616
3524.22	107.236	19581.4	-17.9322	162474	231494	189.81	121514	21.2589	29.9043	593.772	23.5421	39.5434	11.2372
3526.6	92.6892	18276.6	141.092	156482	235668	97.9363	124311	28.0468	15.7021	695.08	21.2369	48.357	-0.997899
3528.98	83.105	17561.1	30.5844	174929	213538	87.7349	134495	6.01645	-3.54109	297.107	22.1269	40.2497	-0.148052
3531.37	99.2678	14258.9	58.1289	166491	232388	136.308	119588	5.6957	20.2506	894.165	19.7651	32.375	-0.137795
3533.75	105.82	16942.8	16.9584	171305	230335	193.132	114180	-12.1796	9.79879	310.547	18.1945	31.6919	24.6829
3536.14	92.2299	20174.8	89.0308	171152	236598	188.123	101148	4.3877	12.9352	819.913	19.7557	50.7941	1.09535
3538.52	107.538	16411.8	47.3269	163554	227566	183.787	129120	-15.5037	20.6183	579.874	14.1219	38.7815	7.23961
3540.9	93.766	16359.6	-0.148084	182181	222929	165.899	111064	-1.32394	13.1527	702.725	19.2697	38.4244	17.807
3543.28	129.356	16105.6	53.2232	165143	219541	127.252	139336	27.0738	11.5409	762.363	18.8941	35.2964	7.23547
3545.66	106.738	17553.5	99.7305	172503	223512	209.89	121896	4.60769	23.1059	705.932	21.5656	41.0455	11.9232
3548.05	96.4934	17525.3	82.1228	169949	223741	156.384	124795	44.0207	4.5876	1008.88	29.527	38.5039	7.72444
3550.43	115.343	17651	-0.11394	188232	216917	119.875	110553	52.4164	26.2556	945.569	17.8827	37.1157	14.5027
3552.81	89.7737	17958.5	139.931	184328	206941	129.71	130970	-12.9776	19.7523	688.453	25.1316	38.1361	-0.121838
3555.2	95.4849	17443.9	42.7978	179774	212448	149.22	129164	4.52639	30.6338	787.441	21.9885	39.7408	-0.120139
3557.58	106.474	17870.6	-6.16022	178461	211329	176.345	131833	5.97333	2.56765	1256.67	23.5611	47.2375	9.5706
3559.96	80.1842	17025.4	91.433	182661	208269	135.513	132148	-7.16221	14.6691	689.708	19.4264	44.1889	7.45798
3562.34	108.878	15860.6	64.0009	170145	233440	134.308	111680	32.1609	10.8954	640.451	24.8183	39.3325	3.10611
3564.73	98.7661	16989.9	191.494	167033	223122	117.719	130954	12.6225	14.4066	118.241	14.5794	44.643	3.09853
3567.11	95.7639	16902.3	-5.63961	186157	216770	96.8116	114941	-14.6832	4.51949	427.685	17.1667	37.263	4.55948
3569.49	145.336	14660.9	-0.00143815	175637	222964	150.513	121459	9.99479	23.1702	647.908	19.5549	41.1067	-2.94587
3571.88	84.1746	16735.4	81.3318	179908	223940	133.356	112301	19.58	21.9578	549.062	9.89536	33.7952	6.31272
3574.26	96.4566	19666.8	-36.6989	192142	210412	174.879	113623	16.2482	12.3992	654.5	28.5685	39.1754	1.58897
3576.64	92.4973	15787.9	49.1017	169643	227041	139.746	122405	10.4092	10.079	503.951	24.4869	38.4235	1.59419
3579.02	103.675	13234.3	16.9153	177090	226496	161.756	115887	-1.21545	8.8106	253.387	21.6826	39.2219	6.11574
3581.41	97.8905	18520.8	80.2154	178536	217325	131.416	122040	15.1949	24.2705	1071.94	19.0005	43.2675	1.49257
3583.79	105.541	17473.2	75.153	171075	242590	120.456	95039.9	9.80302	23.6019	492.307	25.3851	38.4938	-1.67876
3586.17	97.874	19020.2	42.241	172276	230030	126.519	111016	27.5002	27.3619	643.387	19.981	35.2981	4.89649
3588.56	98.0324	17825.2	77.6739	188527	204007	128.709	130244	15.8435	11.6374	361.192	22.2168	41.1156	9.79668
3590.94	91.4177	16745	213.469	189343	206249	147.961	126399	-23.1849	11.4223	632.682	19.4111	39.8222	-3.44688
3593.32	85.4272	19504.8	36.3419	172969	218698	226.785	126781	-15.7348	14.0738	812.901	17.5901	43.7314	7.41391
3595.7	106.97	16381.6	143.334	174949	223557	204.381	119642	-8.78426	18.3233	684.588	25.6875	35.67	18.3856
3598.09	93.6762	19689.4	43.1619	175053	209345	127.987	137892	16.3131	23.7098	1036.28	31.139	38.2147	9.67061
3600.47	116.447	20050.1	37.5448	182657	214696	163.079	119454	6.11108	4.06905	607.861	21.505	51.7976	11.9546
3602.85	104.924	16087.9	18.4205	181844	221271	176.436	114422	27.7655	6.28996	517.922	19.3448	41.8655	-3.42372
3605.24	109.162	18019.1	24.0904	175997	219719	129.559	122689	-1.28075	2.53707	730.638	23.2363	39.0197	9.40942
3607.62	116.404	16598.1	-18.0381	168149	228033	176.933	121996	-20.7241	14.2083	707.135	20.2032	33.5337	-6.78606
3610	84.5701	18823.4	-52.5996	164016	235491	164.595	114189	-1.2568	38.7964	572.851	21.8479	46.7275	3.17848
3612.38	117.128	17689.2	103.944	183027	221644	200.724	110596	20.5813	35.1931	444.445	28.4536	45.2924	13.8249
3614.77	100.257	16721.2	35.2523	179802	229088	138.549	104203	9.9183	32.3303	966.171	28.5923	47.7497	6.38411
3617.15	96.6987	17049.2	125.168	175758	226531	147.145	113392	20.0708	11.1595	727.589	19.7334	32.2285	11.4338
3619.53	98.0859	19959.5	153.842	168135	224460	175.906	123952	36.8915	9.07408	742.951	21.2241	38.3736	7.88742
3621.92	100.124	16670.5	32.9694	175703	227878	151.128	112058	22.0387	10.7598	516.128	23.2059	41.5018	5.35114
3624.3	103.939	17400.2	69.2353	186671	211992	177.59	120632	10.6517	24.6686	649.992	27.5289	45.395	5.56724
3626.68	95.1616	17749.4	18.4462	171663	219927	150.893	128087	20.3892	3.49946	1149.64	18.4133	38.6628	8.28883
3629.06	95.1819	17632.6	43.0877	189203	200613	142.148	134485	-15.9093	21.259	671.475	26.0176	41.2673	3.32676
3631.45	114.148	20376.2	97.5921	186377	212611	138.532	117054	13.2464	2.59516	837.26	17.7062	44.3203	6.66722
3633.83	100.987	17829.3	6.2448	179960	222406	212.463	113421	26.8696	21.358	609.824	32.9519	37.6159	16.1804
3636.21	83.7163	18736	-59.4925	175801	219890	157.119	122264	-8.43003	6.67199	584.073	11.7947	43.6495	6.57109
3638.6	101.813	16129.4	82.9414	182624	207220	221.379	134886	34.0117	7.92504	301.969	16.3839	46.9442	1.59421
3640.98	99.3779	19060.6	23.5191	185666	214541	79.9226	116787	4.30812	19.2538	528.581	18.4047	30.8259	-0.0299099
3643.36	94.1927	16669.8	122.712	165670	233441	146.804	116926	-8.19957	10.9425	640.261	20.1018	41.9529	12.8292
3645.74	85.9937	18587.1	41.5016	183405	208537	121.466	129411	-1.24153	10.5758	554.265	22.6174	47.2306	3.21199
3648.13	107.638	15413.4	122.448	159919	235509	98.9754	122952	-1.22846	12.6908	441.139	19.2671	37.9603	-3.2291
3650.51	93.0204	15183.8	6.09298	157401	239098	166.823	120965	-6.61559	-2.76035	692.617	28.6983	30.1866	10.919
3652.89	110.694	16418.4	50.1412	183311	217314	78.2453	118182	-7.77197	11.2243	590.047	22.7791	37.321	-2.68454
3655.28	99.9293	17022.4	0.472396	175691	224145	115.207	117628	-7.03301	20.0584	438.598	16.728	34.5192	-3.34028
3657.66	110.088	15419.3	-17.5824	161449	229918	134.189	129133	10.2578	16.3833	866.964	28.9008	42.0487	4.97236
3660.04	97.9348	17702.4	34.677	185849	211339	226.308	122856	-12.1086	21.1623	274.185	18.1342	38.5186	-4.72974
3662.42	101.458	16080	-23.9343	188933	221270	146.265	104452	13.3398	13.8321	1050.07	30.1571	41.866	-3.38406
3664.81	102.475	17151.7	76.5657	164203	229209	121.654	124945	-6.82745	18.594	679.15	22.5496	34.5733	1.60737
3667.19	116.449	24896	85.0856	155300	236067	125.016	119115	16.0643	5.82426	514.373	22.4615	40.5358	6.66027
3669.57	94.0102	16515.7	59.6191	195216	200987	168.982	126823	-1.23997	17.8716	667.304	13.2185	44.6485	6.51594
3671.96	101.431	16511.8	105.505	170234	227821	168.696	119511	-1.15916	7.01903	641.402	19.0638	34.6254	-1.52428
3674.34	99.2247	18851.6	42.6561	207100	192611	116.386	121141	10.2424	29.2087	920.755	21.3451	39.815	-8.2902
3676.72	104.715	17069.5	18.021	201184	193738	109.732	129303	26.5804	9.60235	746.372	16.9162	36.1564	7.21966
3679.1	107.253	16192.6	67.9231	164365	226821	112.622	129221	-7.88492	11.4164	755.352	29.1804	39.9186	24.7778
3681.49	90.2191	21380.7	6.42838	180083	213548	187.427	123659	-1.21748	-5.48776	423.85	26.3541	42.1966	1.61588
3683.87	83.9802	15579.7	71.8534	197064	207711	180.397	114520	4.43783	-5.14015	1147.43	14.8775	34.8093	4.92444
3686.25	90.9158	19249.4	63.4351	172602	219599	104.474	126208	5.63833	12.9329	786.552	13.5492	42.6727	14.1975
3688.64	99.9954	16873.9	17.5876	177537	215411	125.674	128027	-12	22.7343	1058.31	27.1206	32.6645	0.0161192
3691.02	89.4087	17068.6	-70.8975	167842	224287	108.638	127838	10.1687	21.2463	636.932	22.1769	37.9079	26.3475
3693.4	94.6975	16430.2	141.224	193901	216344	109.045	105275	-1.21993	26.679	534.946	15.4684	39.3158	1.23333
3695.78	104.881	14339.1	107.444	177774	223659	226.612	117683	-1.23447	31.5472	651.702	22.054	38.7587	8.20641
3698.17	88.918	16913.9	-28.6296	191089	213271	103.284	113642	-8.2346	29.8559	390.665	20.2296	44.0859	11.3546
3700.55	95.3962	17985.2	68.6447	156850	222602	107.602	143892	-1.17703	11.1016	1025.04	18.0094	36.2567	1.19962
3702.93	99.6456	15726.2	105.648	176330	222986	139.087	119513	15.521	9.20191	550.372	21.6734	35.7542	3.24734
3705.32	86.7637	15888.1	-5.23139	188755	212312	201.721	118836	21.6786	19.9741	695.099	19.042	36.7366	13.6672
3707.7	88.0066	16842.8	73.678	185942	210082	166.525	125029	10.3655	10.5188	761.368	12.7697	39.7026	8.41787
3710.08	88.1464	18093.5	13.038	176696	211719	90.413	133339	51.4341	11.5352	1353.46	20.282	38.6335	15.2379
3712.46	76.3251	15439.5	29.2464	157331	219308	182.066	151212	5.63623	33.3681	467.567	22.7224	38.5161	11.0463
3714.85	93.77	16172.1	113.333	172550	228892	136.159	114986	4.4418	12.0708	742.281	15.6381	42.6695	11.4823
3717.23	90.0581	16825.9	77.1751	175131	223768	227.359	118870	-15.2685	25.4338	554.737	22.8324	35.78	-2.79208
3719.61	94.9182	15310.8	97.5866	192315	210760	98.8574	116943	15.1648	8.12594	695.821	15.03	39.4911	0.0459109
3722	100.744	16544.7	160.845	182607	214027	124.988	123702	-25.803	14.5064	801.723	14.3048	41.8098	7.11467
3724.38	88.5641	14948.3	81.3128	196437	205964	149.405	119133	-1.2752	19.6946	603.085	27.9938	45.9445	-13.5991
3726.76	102.086	17448.1	86.1855	177790	228633	136.463	106906	-1.25488	25.4442	932.867	21.0045	43.3477	16.0249
3729.14	75.4674	16910.8	12.8287	170119	229676	143.252	116891	27.3445	25.4058	268.435	26.224	41.7015	6.64993
3731.53	91.7069	18263.6	0.985151	182638	218546	184.023	115476	-17.2463	6.95049	544.649	30.939	43.0976	-9.09266
3733.91	103.678	18652.3	32.2096	193197	211257	134.386	111621	70.4728	22.7692	802.505	24.0738	36.9456	3.51436
3736.29	105.16	15751.8	19.0182	163420	227283	175.055	130036	10.3062	13.6888	961.118	22.4247	36.7419	3.39497
3738.68	129.586	17394.9	19.4453	179640	226608	145.19	108042	-1.26312	12.0896	466.974	25.3704	31.7288	3.46692
3741.06	99.6821	21735.5	-97.1688	179919	214190	194.656	122182	22.2166	11.1086	901.26	18.6664	37.08	10.2258
3743.44	107.181	14584.7	35.6443	149362	215208	150.203	168827	4.35089	26.8271	707.119	25.4022	37.3027	8.05239
3745.82	111.072	15814.4	0.946875	177905	221008	107.125	120442	-23.6388	8.83025	625.922	19.4213	34.4	0.0731533
3748.21	105.943	16416.9	-101.548	175091	224097	124.196	118732	-1.16434	4.66419	942.189	24.2283	44.5792	-6.60334
3750.59	107.337	17401.1	-10.9634	167687	240337	164.367	102935	5.93493	21.8124	786.904	12.5698	30.0442	9.98764
3752.97	104.331	17081.8	108.772	170525	223470	152.117	125293	-1.22214	11.3044	546.439	19.8266	32.9857	21.9661
3755.36	100.173	19174.6	46.1128	173809	228331	169.192	110844	-13.6166	28.3473	1223.04	27.3597	40.5975	16.0588
3757.74	81.5347	19834.9	86.4207	180649	222995	95.9917	109910	9.73736	42.5043	396.681	15.0277	46.1174	4.79678
3760.12	92.4674	20557.3	-5.47835	203912	189798	108.326	128164	-14.0892	45.0913	916.016	24.7276	37.8588	29.4767
3762.5	119.214	18024.4	85.0591	177939	224389	168.931	112989	4.51959	13.6284	510.62	25.5284	43.2328	-3.21927
3764.89	101.345	17304.2	44.5451	180579	227500	152.841	105017	10.6104	28.7774	949.893	17.204	45.2575	15.5037
3767.27	85.9181	15970	-47.208	173259	226315	159.447	118149	20.4341	8.18285	942.933	17.5534	39.1937	8.42585
3769.65	90.573	17848.3	-17.7012	172425	222297	126.418	123833	58.9036	31.5795	613.01	11.5111	47.8482	3.5747
3772.04	80.7612	17780.6	144.074	185648	224490	268.721	102444	-8.33195	12.6241	654.126	22.1307	39.2017	9.55062
3774.42	88.3842	15913.3	-4.58317	168712	228417	146.762	121417	-1.1438	16.2718	602.3	19.4471	38.4009	9.44027
3776.8	99.6582	17390.8	118.949	191157	205807	191.935	123926	-1.25493	15.0283	757.176	18.8498	38.573	-11.4315
3779.18	89.7718	14934.4	-107.272	184568	215817	212.913	120222	21.8331	0.812354	661.436	19.9439	29.9715	0.108975
3781.57	97.9879	17516.3	72.4208	168830	223896	117.622	126597	21.524	4.42896	523.546	31.6569	34.0487	5.0248
3783.95	95.2122	17021.7	63.0212	176769	213983	150.659	131503	35.7018	15.4608	487.487	25.4516	39.2902	6.93641
3786.33	82.4763	15182.9	7.63466	174065	215982	143.895	133856	21.5337	16.884	619.704	17.631	42.7071	8.89617
3788.72	88.9467	17141.3	59.2242	184282	216391	144.488	117206	15.4896	17.1852	906.47	29.3802	39.2377	14.5278
3791.1	101.645	15970.6	199.568	175068	228617	158.396	112252	-14.7002	13.7528	569.797	22.9639	38.5711	1.67786
3793.48	112.296	17549	-81.7935	172118	221723	135.791	125474	12.9866	13.4799	650.938	23.6182	44.0438	8.30017
3795.86	91.2117	16993.5	-97.8149	175262	223688	103.194	118741	9.9732	22.1397	765.559	16.9276	42.4905	1.72872
3798.25	105.803	16635.1	-72.635	172335	227111	156.348	117928	-15.9733	10.2507	562.112	22.8815	44.3929	3.53064
3800.63	97.7287	18323.8	-16.8541	191830	208362	131.246	118551	-1.21429	8.6728	607.718	28.9686	35.2083	6.80342
3803.01	89.7204	16093.6	12.6264	182274	224453	169.077	108645	-1.14366	20.7953	925.154	29.8018	40.0498	-1.44637
3805.4	89.1868	18475.1	130.77	192205	203613	163.425	124781	-6.81052	9.79355	809.888	15.9126	51.072	15.5577
3807.78	98.9884	18222.8	80.0017	176360	220100	152.967	121475	19.0574	14.9477	565.518	7.25582	44.3064	9.44218
3810.16	93.334	16661.3	-4.62026	162094	232237	203.429	123628	-22.4567	-5.52083	760.837	14.0327	46.4243	16.495
3812.54	85.774	16632.5	73.626	172184	223124	146.023	123890	12.2025	1.19216	783.296	19.9254	32.4234	-8.31624
3814.93	77.8047	15937.7	6.69696	186300	221678	142.722	107862	5.44654	24.9696	684.833	18.8332	39.4053	7.67512
3817.31	96.8712	15856.1	105.374	175327	222790	87.1435	121088	9.39082	9.54359	567.664	15.1826	34.6014	3.15798
3819.69	81.8874	17138.9	72.7079	162824	230797	167.225	124206	5.4753	16.704	858.018	23.1826	39.8454	3.16913
3822.08	97.7237	18299.5	12.584	177609	220994	186.797	118606	5.61572	9.38865	357.295	16.3713	35.5835	17.2448
3824.46	85.5836	16172.4	43.5278	174879	222667	140.987	121691	16.066	26.5535	455.756	15.0439	39.5923	8.45236
3826.84	85.3528	17783.8	114.745	188538	206992	133.719	125288	-1.18691	12.6692	802.115	14.1116	45.9035	15.7866
3829.22	112.555	18492.5	20.626	188194	208127	186.52	123363	36.8051	9.63659	757.936	18.4953	45.033	3.68209
3831.61	92.0359	16192.5	-38.1007	169409	225662	98.5502	124531	9.66355	-2.22503	583.745	12.5752	29.8069	6.37106
3833.99	94.385	14724.9	141.65	173600	224097	172.084	121851	-7.03925	23.1825	1158.54	22.6245	37.9344	5.6301
3836.37	101.911	17077.3	176.065	173035	237382	159.574	100328	-1.15454	16.8139	800.749	17.6896	35.1969	7.38749
3838.76	99.1975	13944	6.95154	164533	230204	154.373	126076	-7.74937	29.6398	730.424	13.8994	38.5735	3.22357
3841.14	88.6711	17493.3	-34.8199	171866	216495	170.539	133762	-8.43789	16.5641	739.246	20.8423	44.7053	-1.49747
3843.52	99.9328	15283.8	1.58973	181592	217342	173.339	121458	6.26872	2.32176	669.997	24.1637	33.2223	8.84635
3845.9	85.0753	15523.1	66.876	196244	206900	239.164	117196	14.3043	19.3368	755.894	14.5437	44.3685	3.78857

## Sheet: Li7
Sample	T [°C]	t [s]	p [bar]
Li7	704	259870	2000
Linescan														Lines parallel to interface					Isotope profile
Distance [µm]	Li7_ppm	Na23_ppm	Mg25_ppm	Al27_ppm	Si29_ppm	K39_ppm	Ca43_ppm	Ti49_ppm	Mn55_ppm	Fe57_ppm	Sr88_ppm	Ba137_ppm		Distance [µm]	ΔDistance [µm]	Li7_ppm	2SE		Distance [µm]	ΔDistance [µm]	δ7LiIRMM-16	2s
0	97.2258	17399.7	74.5208	180839	222487	64.0967	112789	0.173379	4.33595	473.484	39.3264	3.74637		Crystal					Crystal
2.336	106.062	15613.8	62.3362	169286	229048	53.2403	120204	-5.02508	0.732351	360.249	38.9549	2.3455		21.635	12	26.3217	0.799929		45.69	12	-5.65662	1.88923
4.668	103.1	18407.8	102.211	178405	222887	70.8679	114378	3.32154	-2.58726	552.388	37.8953	1.71104		57.61	12	31.4401	0.753935		101.172	12	-17.813	1.71852
7.004	100.825	16795.8	40.7318	163102	235746	57.1385	117283	3.20684	0.515318	269.352	34.9007	1.65181		94.843	12	28.0848	0.836981		153.054	12	-30.5963	1.83088
9.336	105.028	18312.7	84.2733	172974	223245	53.3154	121490	-6.15701	7.84286	331.493	42.5449	2.37982		130.734	12	25.1442	0.66734		204.603	12	-47.2842	1.80631
11.672	110.562	17238	85.1494	174663	226131	58.1717	115671	3.36698	7.92399	482.291	36.9015	2.73904		167.044	12	20.3933	0.643945		253.808	12	-65.1058	1.86645
14.008	108.623	17239.4	84.6588	171862	228470	73.4067	115806	11.7796	4.13684	541.008	36.5469	4.86638		204.78	12	16.3765	0.559368		304.017	12	-75.612	1.95453
16.34	102.946	15756.9	54.879	160493	243567	48.3353	109814	0.139957	11.0421	283.015	38.1011	2.25482		241.509	12	11.9432	0.47172		353.222	12	-73.9985	2.10591
18.676	114.817	16638.4	46.7903	172335	226104	53.0604	119653	-2.7895	7.69317	300.821	36.2211	3.44975		277.987	12	8.81232	0.415163		400.084	12	-59.4766	2.21746
21.008	104.174	16792.7	36.1757	170691	226330	62.4352	121264	0.162829	10.6855	439.784	37.8637	2.63762		315.22	12	6.4178	0.346688		449.623	12	-48.9367	2.37311
23.344	103.335	17722.4	88.8403	174307	223593	68.3014	119735	5.64781	5.14607	294.849	38.5657	2.80234		351.95	12	5.05837	0.30783		498.828	12	-42.2256	2.40214
25.676	110.823	17546	52.2073	171133	224901	71.8415	122199	-2.95773	4.03425	327.396	40.8537	5.61842		389.182	12	3.97031	0.293645		551.213	12	-40.6684	2.37368
28.012	114.233	16996.4	47.1995	172983	222603	50.2159	123539	15.824	8.80234	549.303	35.6455	1.03983		427.17	12	3.8024	0.316949		655.649	12	-39.6076	2.54708
30.348	114.119	17174	65.0531	172712	232412	57.1594	108726	3.27981	8.76006	546.716	34.2362	3.64834		464.319	12	3.40902	0.255299		855.146	12	-39.3047	2.49861
32.68	110.302	15811.9	101.454	169867	228805	63.3207	119566	12.0473	6.00193	295.763	41.1379	6.28464		500.881	12	3.30861	0.231975
35.016	108.576	17175.7	70.1332	175967	224280	68.0579	116989	-2.74868	7.00126	296.335	39.3098	4.85188		Glass
37.348	114.672	16877.5	51.8338	175833	226730	56.2056	113627	-2.93619	7.88782	417.285	36.3368	2.64963		-11.153	12	90.8942	1.5098
39.684	105.295	16736.5	54.5784	177780	225247	67.6012	113452	0.160458	4.01608	359.653	39.2756	2.65732		-48.889	12	83.9733	1.5385
42.016	96.0778	16241.2	81.849	171356	227653	59.0811	118702	-1.73626	8.27299	589.754	36.3866	4.69887		-83.774	12	88.9249	1.55608
44.352	105.585	17237.4	49.6168	164062	236957	73.1073	113475	3.11467	9.69735	479.676	37.2207	1.60208		-121.174	12	91.2113	1.81743
46.688	94.7023	15299.8	46.4603	169885	229899	48.6975	118407	3.23542	4.59028	381.536	34.397	2.63201		-156.73	12	93.2963	1.80455
49.02	112.296	17339	29.4768	175248	218980	69.6165	125756	6.50053	12.2584	487.446	39.5623	4.70344		-193.124	12	93.3855	1.56222
51.356	102.185	16878.2	10.6111	180436	225881	66.3362	108825	-5.89928	11.1076	350.633	39.8179	3.53941		-230.692	12	96.0731	2.12847
53.688	109.361	16458.4	40.2438	167897	229274	52.3927	120943	-2.84058	13.5499	346.686	34.5021	3.49902		-266.247	12	96.084	1.80425
56.024	104.799	16941	63.627	175788	219883	52.9901	123947	8.40065	9.33137	564.898	38.9255	1.31321		-303.312	12	98.7773	1.8235
58.36	109.548	16992.7	56.3996	162778	236054	57.4483	116858	-5.9689	11.0347	446.126	40.5126	5.89025		-339.874	12	97.5467	1.67278
60.692	99.9722	16780.8	51.682	175673	222509	73.4022	120372	3.08452	9.81065	435.93	34.6676	5.28025		-377.778	12	100.788	1.76137
63.028	110.98	17551.9	46.6104	175757	228622	75.5801	109940	9.40557	9.28378	658.456	39.6982	3.60417		-413.166	12	100.031	2.04212
65.36	104.321	17804	92.5949	177286	218463	65.6113	123378	3.2376	2.36373	407.597	37.0039	1.66398		-451.405	12	102.124	2.1875
67.696	106.627	16664.2	46.8957	176799	225459	59.5965	114381	0.146514	3.80701	532.167	32.9491	5.65469		-487.296	12	101.512	2.13691
70.028	105.328	16833.8	26.1941	163047	230837	60.0325	124540	-6.00992	13.9564	582.891	39.5402	2.04983
72.364	99.57	16755.7	3.20947	164801	232586	60.0544	119668	-2.91095	3.35953	529.526	34.3188	1.6516
74.7	114.099	16886.9	31.6673	177784	222700	64.6171	117259	-2.96217	8.56015	310.61	37.1364	2.66006
77.032	109.768	18362.2	68.9016	180216	219473	91.7465	117447	-5.12115	6.39991	298.498	33.3398	0.511616
79.368	108.126	16865	48.3417	177205	225401	64.2099	113730	5.59834	3.32281	515.388	34.8779	1.63157
81.7	107.846	16485.7	18.1745	172301	223638	58.7791	123528	6.17534	5.69578	431.351	36.9866	1.24462
84.036	103.124	16733	52.2841	172204	227957	73.4341	116793	10.7324	4.23728	403.198	36.83	2.32876
86.368	107.42	16915.2	66.6621	174822	227657	60.6143	113462	15.4566	7.40213	463.117	37.3226	4.53757
88.704	97.5984	17371.8	13.4757	165844	227726	74.2617	124968	0.149004	13.1153	623.519	41.6179	3.58912
91.04	107.374	17618.3	55.1925	164407	236135	61.3689	113881	5.52473	10.9773	492.772	37.3814	4.24139
93.372	109.426	16488.4	55.931	178317	223578	57.5422	115388	-4.0941	10.1228	499.333	41.353	3.53498
95.708	107.182	16684.1	75.9738	169927	230931	75.0221	115098	8.3949	12.2968	648.331	39.0242	3.9075
98.04	93.5037	15936.5	35.0715	168959	233337	68.2265	113810	2.56355	2.8494	350.346	42.7102	2.23934
100.376	109.36	17129.1	71.3767	172685	226929	81.3462	117179	9.19511	6.27462	526.571	39.1581	2.27312
102.712	109.006	18038.6	78.312	169580	225895	89.2684	122074	9.50531	8.98551	514.358	36.1493	1.28444
105.044	101.951	17493.6	45.7592	168268	227663	74.317	121654	3.34152	7.71831	604.029	36.467	2.91902
107.38	100.23	17668.1	52.1249	180457	223963	98.732	110869	13.1818	16.9091	351.689	37.2262	2.77472
109.712	103.97	15553.9	74.5441	166851	233473	58.4689	116682	-1.75674	10.4136	437.913	37.8238	5.70479
112.048	118.92	18853.1	54.2728	182378	221984	86.5597	110247	5.95242	1.41668	251.967	42.0672	3.75862
114.38	99.0688	17434.9	81.246	167868	222304	54.125	130581	6.619	12.3071	428.243	32.4676	2.14347
116.716	105.059	16182.9	89.4078	174458	226424	52.5958	116394	5.80521	11.9644	620.968	33.926	2.67663
119.052	102.758	16878.1	31.0415	169109	233579	59.2675	112339	0.748557	5.54562	344.594	34.5762	4.49587
121.384	104.782	17373.1	85.7908	171183	228238	66.8755	117129	-4.08262	8.49326	374.969	35.6507	3.51591
123.72	119.019	16820.9	129.856	165920	231023	53.8226	120410	0.143823	6.50916	404.075	40.7539	6.5682
126.052	105.426	16587	37.4208	164526	232814	78.8383	119828	-6.15114	4.91816	485.391	37.5799	2.87685
128.388	106.498	18121.8	83.5185	165712	230316	70.4127	120443	3.16163	6.91812	556.321	37.2822	-0.280816
130.72	110.621	16366.4	78.4612	167113	236461	69.5575	111026	0.138139	6.11545	367.478	31.6242	3.51982
133.056	102.006	17067.9	82.1613	170077	229294	63.7456	117284	-2.92527	11.4658	397.856	37.4303	4.53532
135.392	107.339	16697.9	46.5355	170940	221585	65.0729	128233	9.31551	3.1652	463.458	31.8984	3.56365
137.724	105.795	16512.9	6.09787	168191	224600	61.3455	127554	12.5698	5.06207	462.424	39.7887	6.55216
140.06	106.382	17676.9	64.6085	174086	224770	65.3712	118255	5.67234	8.05165	349.156	36.5605	1.25978
142.392	105.91	17670.1	59.2668	172053	228501	77.0837	115058	3.19819	11.4511	604.933	40.1551	5.10499
144.728	107.229	17444.9	53.2702	179347	225605	56.4551	110052	3.14272	9.86408	423.258	34.0972	1.98883
147.06	109.326	17314.9	135.345	173433	227838	57.2979	114654	-4.9645	12.6656	422.429	32.8742	4.52684
149.396	106.588	17336.5	66.528	181136	222079	62.1392	113084	-2.90789	1.54454	461.325	39.9215	6.41563
151.732	121.211	18817	47.5262	178836	225167	54.7083	109962	8.24998	5.70295	540.637	36.4701	4.41722
154.064	105.719	16387.2	22.5497	172295	225029	78.0959	121470	5.34374	9.12242	439.292	40.6448	6.10762
156.4	99.7172	16556.9	67.6572	172340	230260	59.7441	113270	0.655774	12.0066	392.833	35.7711	3.97271
158.732	108.948	17034.8	54.4758	180934	219041	71.0256	118434	3.06452	7.11103	301.831	36.2869	4.15534
161.068	102.742	16599.3	6.02709	173028	229509	66.0154	113566	3.15593	4.33091	335.524	38.3307	4.78687
163.404	110.636	17836.6	27.7901	175672	222847	86.1063	118672	-3.08235	15.8914	619.918	37.0219	3.75003
165.736	116.945	17367.3	68.7827	180610	223623	59.4863	111438	0.795483	16.9758	389.223	40.6393	2.77359
168.072	105.58	17850.6	98.3637	177851	223019	72.8599	115582	16.445	12.2053	379.633	41.1986	7.07607
170.404	104.101	16458.1	64.2128	165943	232732	49.0346	118261	-1.7675	10.6235	360.94	42.3651	0.696311
172.74	109.603	17492.9	50.3487	174910	225604	77.3976	115958	-1.74301	11.92	449.272	36.9269	3.63958
175.072	101.249	17986.6	33.9096	177933	221215	53.1777	118273	-4.13698	5.37458	338.453	37.1767	4.50404
177.408	111.625	18955.3	72.7151	177517	221026	63.203	118138	16.1351	5.2199	285.866	40.9228	7.74744
179.744	115.593	16930.3	16.8598	173680	222979	56.7841	122153	-0.919476	10.5851	522.661	39.435	2.35004
182.076	104.049	17340.4	60.6936	172590	223761	47.8299	122002	12.9908	6.92415	509.738	39.8887	6.23746
184.412	101.515	17639.1	65.0503	167113	228846	70.9975	121430	4.52484	12.0979	396.349	37.6393	1.64616
186.744	106.263	16801.3	103.835	171201	233457	51.5713	109580	-2.42827	11.3326	467.233	30.4023	3.74405
189.08	122.669	17732.5	65.3514	168373	224299	70.9751	126589	16.2673	8.67353	349.689	36.263	4.76492
191.412	100.516	17136.1	-1.47895	164110	233786	63.8467	118588	13.9151	11.8506	293.325	36.7381	1.748
193.748	100.853	16974.5	94.8903	185399	215735	49.7424	117218	-7.38953	6.04076	621.893	35.3536	7.20979
196.084	111.805	16653.4	61.2123	178217	215451	47.7854	127762	3.42654	18.1849	517.347	35.5354	-0.318045
198.416	105.64	15746.8	39.0988	172660	227791	56.3338	117273	6.65945	7.04907	548.418	39.4989	1.73709
200.752	92.7177	17674.4	88.9455	174901	224895	60.278	116723	22.5887	9.05024	582.847	35.1527	6.14908
203.084	104.751	18017.3	65.7129	173276	227638	49.8088	114668	3.24205	3.44069	337.77	35.2333	3.61724
205.42	110.395	17431.8	52.8471	171241	228511	60.9473	116531	0.133858	1.02506	461.878	36.662	3.80389
207.756	117.254	17286.5	12.3741	176979	231022	47.1879	105095	0.802584	20.6321	488.309	34.2791	0.724592
210.088	120.089	16537.2	44.7733	175449	222843	69.6952	120271	-1.8341	2.32542	569.105	34.3533	1.74363
212.424	107.356	15976.8	90.7913	170313	228481	64.4261	119081	11.2605	13.7723	550.443	40.1293	2.77014
214.756	97.8669	15652	69.2735	180807	217345	64.5063	122302	15.3314	9.98913	536.338	40.3057	1.99982
217.092	110.946	19501.8	16.8059	177435	218524	67.8626	121513	0.125291	11.4961	415.264	33.5903	6.57472
219.424	108.926	18839.5	12.2002	172787	220290	77.6412	125528	6.0207	13.3382	621.419	36.6094	3.79785
221.76	102.575	17245.4	54.9811	170613	224464	59.1398	123746	9.84011	10.845	456.748	30.9547	4.77527
224.096	113.445	18157.3	54.0479	168633	230972	59.4919	115415	13.5124	19.156	617.173	35.2965	0.723939
226.428	111.138	15763.2	52.1084	177150	219798	53.2438	123459	3.35131	11.2277	481.178	36.9555	0.494454
228.764	99.8919	18250.3	91.3264	176449	220044	71.394	121673	19.8676	14.2808	357.21	41.2263	4.64467
231.096	108.093	18090	100.078	172944	225742	75.3551	117696	-1.80587	9.08983	533.123	39.7131	2.11426
233.432	102.721	18087.3	66.2832	170426	221091	50.9973	128570	-1.83046	2.96572	221.663	40.8869	2.14207
235.764	108.219	17785.4	30.6559	171126	223627	67.6723	123804	9.75638	12.8787	479.336	32.3368	2.91532
238.1	118.733	17291.3	35.5784	176777	219693	63.7187	122642	5.8377	0.580515	491.282	41.914	2.68273
240.436	105.657	16832.5	95.8484	166061	231159	69.912	119901	0.755651	8.94294	567.457	35.0325	2.87519
242.768	113.804	18494.4	90.2527	171363	231032	73.7488	111489	9.58502	10.1569	376.99	36.8907	1.67218
245.104	112.55	17854.8	79.5418	173751	222430	64.0201	122190	3.26445	4.7268	239.315	39.0072	4.6343
247.436	111.814	18463.8	17.1689	179162	222096	74.6904	114676	0.120753	1.20829	464.385	37.9043	2.34208
249.772	99.0824	16649.3	45.9593	174595	229912	80.8981	110457	0.752349	13.7271	635.164	33.3284	1.27665
252.108	109.922	18701.3	69.026	170601	229973	61.0916	113935	-3.13757	15.2367	434.06	39.0265	2.75306
254.44	98.9308	15970	124.065	175534	228141	60.2995	112587	-5.93058	10.331	517.099	38.5624	5.40429
256.776	113.668	17789.7	75.7425	170912	227563	79.5574	118045	2.82689	11.1126	429.261	41.5659	4.52889
259.108	117.265	18133.2	56.0967	173236	223345	69.5431	120969	0.112167	10.0619	529.879	35.5546	4.98836
261.444	103.614	18766.7	84.389	176637	220082	73.0694	120974	0.76552	14.4411	263.388	40.016	7.80043
263.776	106.424	16807.7	33.7078	172643	225964	60.0101	119294	0.76746	7.64853	308.17	42.8346	0.693593
266.112	99.6221	17278.1	87.4119	175761	225658	55.5129	114965	6.80704	9.88186	390.691	42.6254	0.715564
268.448	100.531	17538.3	43.4786	169861	235797	63.4768	107299	9.61222	10.4047	309.988	33.9738	3.66566
270.78	100.354	16968.5	76.917	178170	219901	81.8942	120775	3.48959	9.95617	430.164	37.3292	-0.339433
273.116	96.5789	16544.6	86.7984	171471	226450	66.0569	120235	11.3994	6.30696	405.914	41.3824	2.1705
275.448	110.865	17645.4	45.4698	173526	224929	66.8935	118612	3.42933	16.5589	557.589	40.0989	2.78969
277.784	119.069	16514.9	99.5088	172349	230318	61.3745	113141	3.31092	5.86506	391.066	37.0707	7.72137
280.116	102.008	17429.7	52.2598	171533	221327	63.6349	127246	-3.10285	7.18368	341.593	35.4257	2.10488
282.452	103.607	17411.9	34.8933	168969	225116	69.4258	124970	6.80513	17.1688	282.232	42.8801	5.97254
284.788	112.702	18082.2	71.0383	174629	226871	53.0052	113801	6.56154	10.3866	464.56	36.2354	4.74441
287.12	113.986	17499.5	67.1559	174677	224945	60.1873	117276	3.27786	10.2001	430.485	35.08	2.06876
289.456	119.084	17573.2	68.615	181230	221809	63.6805	113179	-1.00271	0.84814	393.846	41.2966	4.95302
291.788	111.297	18713.8	66.364	171923	222368	67.2446	123738	5.9725	8.33886	451.49	38.8977	3.76483
294.124	100.08	18344.1	111.729	169893	228588	48.8129	117254	3.27581	8.31937	507.753	42.0885	4.65682
296.456	104.148	16257.1	91.5385	175603	223477	59.1953	119407	0.728811	14.5031	480.93	35.3513	2.28623
298.792	116.824	18118.8	80.1354	173942	221903	59.8473	122215	3.26844	3.71657	532.545	36.3676	2.6588
301.128	110.269	17375.6	82.4707	172404	229150	46.4356	113967	11.649	12.2213	488.007	35.3616	6.28086
303.46	100.626	17759.3	40.4095	170999	225581	62.3602	121250	0.107598	6.35009	238.382	41.3595	0.661696
305.796	108.915	17373.6	79.0878	176062	217052	57.4504	127657	-4.55301	12.288	363.278	36.1313	4.90373
308.128	96.5864	17413.3	82.9545	177115	223575	48.4315	116023	6.24023	11.3077	592.269	39.2001	4.51179
310.464	104.118	17436.1	56.4069	168760	231462	65.1947	115377	5.40032	7.33296	433.411	38.028	9.75379
312.8	107.259	17836.5	59.324	170996	229115	86.9297	115631	7.65232	5.33849	332.453	37.6963	1.52907
315.132	116.17	17456.7	38.5604	176864	222662	71.7402	117905	3.2838	3.95098	397.977	39.7026	4.47096
317.468	115.032	17679.4	71.2263	176937	224519	54.9422	114737	-1.82693	12.5282	395.386	35.0684	2.37346
319.8	106.54	17731	60.5828	180958	217074	62.0685	120559	-3.26342	8.43477	505.498	37.6422	6.02625
322.136	105.677	16691.4	29.6535	168295	223862	59.4888	128399	3.46794	8.38578	411.53	39.2789	7.04657
324.468	107.243	15723.1	58.3008	171447	231905	58.8261	112707	6.60349	8.32944	451.115	36.8496	2.38887
326.804	113.046	18539	32.422	180524	222570	67.4479	112077	-4.58365	8.59926	402.075	40.6957	4.7171
329.14	100.615	15978.1	43.8499	173250	229580	71.6003	113560	3.27856	20.0864	484.03	34.877	5.26479
331.472	105.671	17056.7	94.5342	171911	231153	60.7108	111976	0.107473	4.09543	385.757	34.7159	3.7999
333.808	116.315	15918.3	23.7405	172022	224589	59.7084	122918	-3.1926	12.6033	494.328	39.5189	3.81028
336.14	114.383	18020.5	75.158	174242	228851	65.4982	111124	30.706	13.4335	656.841	42.8653	3.06894
338.476	108.745	18503.5	30.381	167739	228074	78.8173	120892	9.03066	11.2933	458.146	41.625	1.80088
340.808	107.285	16981.7	74.5379	173322	227115	65.4084	116231	3.35326	2.97353	495.631	36.4559	-0.340302
343.144	103.929	16667.8	98.4806	169542	226984	67.0233	121808	16.7567	8.10405	471.898	42.1125	3.84354
345.48	98.4711	17790.8	63.2976	178144	223074	64.0481	115201	6.16472	0.192866	431.301	39.6227	1.76531
347.812	103.493	17178.9	82.5137	174456	227454	57.609	114297	13.726	6.18235	151.748	36.6433	-0.341001
350.148	94.2786	16545.2	82.0412	171460	224526	77.227	123040	14.1044	11.8536	562.87	39.5009	1.74755
352.48	100.428	18182.8	33.8895	175050	225989	71.8729	114461	12.9719	12.2935	534.687	32.7745	1.68662
354.816	103.844	17092.6	60.461	161853	237339	68.3727	115999	0.100043	0.822539	498.987	35.6463	5.32386
357.152	107.86	18301.4	94.1517	175350	224361	65.0787	116544	3.37474	2.99844	348.609	33.4638	2.74524
359.484	108.683	16860.9	65.6108	172621	228761	65.9116	114594	16.116	4.83862	680.137	40.3632	2.68626
361.82	108.632	18457.2	35.2024	178188	219169	73.9341	120451	-6.57559	10.7747	464.401	41.6715	3.8506
364.152	105.884	17637.1	86.0419	166342	231170	68.1692	118828	3.26993	10.8692	467.168	36.3283	3.6588
366.488	99.4766	18443.7	80.9765	173837	221343	79.8333	122934	3.27675	15.7211	494.139	35.3983	2.33185
368.82	109.165	19455.3	46.9918	176270	218736	63.0901	122761	8.41113	7.78771	427.535	35.5926	2.68
371.156	113.763	16670.6	69.5681	166634	234873	60.8373	113702	0.722511	7.02601	488.022	37.9358	5.59694
373.492	101.596	17438.7	53.2449	159743	236472	67.3115	119825	9.86272	12.2255	505.884	36.9979	2.3856
375.824	106.726	18060.6	62.7982	172120	229137	58.599	113952	12.8611	10.3019	244.967	39.9396	1.66882
378.16	102.271	16560	58.7637	170916	229174	52.2404	116906	-2.6726	3.25392	353.406	41.3407	5.2546
380.492	109.423	18196.3	70.4495	171839	229518	55.1212	113504	0.0765057	7.86583	382.434	35.5701	1.35682
382.828	107.934	18971.2	57.6132	177662	218466	64.064	121707	-4.18837	5.22492	491.624	35.568	5.05956
385.16	98.3267	16889.5	56.5106	169818	228662	67.5227	118844	6.08028	14.6184	335.806	42.2372	4.2065
387.496	110.592	17548.9	84.5931	173639	233061	64.948	106230	3.11131	6.76791	404.499	36.1471	1.57911
389.832	103.52	17983.6	83.8723	169966	224282	77.2675	124281	13.0634	13.2364	287.585	37.2955	4.33584
392.164	113.688	17271.9	38.4957	172732	231407	59.518	110205	-2.86092	6.98219	513.974	39.7603	2.15575
394.5	104.197	16451	45.8911	180342	219744	49.34	118661	18.1601	4.91826	391.582	36.2526	1.62604
396.832	109.903	17823.9	48.8207	175512	221775	73.0066	120652	-1.89421	5.45066	497.453	31.99	2.14637
399.168	104.515	16583.3	102.007	170589	232542	53.3998	111994	0.785324	7.47628	488.495	37.2996	2.51681
401.504	119.591	18422.3	59.0126	168343	223888	83.3752	126572	11.7449	11.516	374.938	38.6325	6.10103
403.836	104.457	16622.2	-0.569238	171473	225123	61.8441	122399	16.8261	8.15639	266.416	42.1081	5.25659
406.172	97.7154	17290.8	-8.87564	165243	235018	77.1856	114788	-1.91524	7.71631	575.235	38.6643	2.16621
408.504	111.652	17038.4	54.4721	177254	218250	74.2574	124403	-1.80907	4.57497	526.078	37.8862	2.64223
410.84	99.6901	17027.9	23.0919	167850	234520	70.2061	112379	3.2525	11.4785	423.881	37.4383	1.64922
413.172	95.1414	17696.5	45.6052	174354	226887	50.5916	114384	6.63861	9.92846	678.378	35.4814	2.73654
415.508	111.719	19389.6	19.2159	163929	232031	67.4438	119143	14.3905	6.05188	465.152	37.963	4.98805
417.844	108.738	18027.6	96.8814	178111	220860	75.9311	118429	-6.44159	8.17663	339.858	37.5709	3.7556
420.176	101.929	16939.2	12.3799	165107	236067	84.5222	113774	0.703201	8.98929	457.185	35.4171	4.34539
422.512	108.008	18007.1	75.3763	183128	218549	65.3734	115071	3.48263	-3.37237	528	36.607	3.04656
424.844	106.719	18234.3	-0.451345	178274	225670	61.2388	110662	-3.0868	2.08045	476.457	39.8751	2.8478
427.18	106.395	17776.5	36.455	171751	227036	75.0391	117951	10.9002	19.3093	244.975	34.5792	3.65773
429.512	102.642	16598.7	32.6365	171490	233576	56.5651	109262	0.69444	8.49754	486.138	41.991	0.436365
431.848	107.686	16067	20.4062	179547	224318	55.4103	113307	6.36456	2.8924	216.411	32.2725	7.56701
434.184	111.17	17384	58.9233	178657	221160	77.7565	117666	0.0845724	13.746	577.721	35.1257	1.00888
436.516	103.018	17269.9	57.1251	177704	222957	85.6212	116421	-3.22211	15.4929	470.199	36.8576	2.13518
438.852	107.344	18264.7	45.275	183350	218172	73.5905	115136	0.731903	6.6278	505.117	44.4919	3.72709
441.184	114.819	17438.5	98.8467	175604	225818	72.3169	114601	11.0897	15.3789	521.802	35.6856	2.70067
443.52	121.961	17918.8	43.3052	170822	228202	81.2443	117016	0.742861	6.08291	522.406	38.0295	2.95693
445.852	109.954	16958.8	68.2943	170898	221773	65.1952	127710	0.0803783	11.7768	479.289	35.0069	1.25336
448.188	99.0951	16131.4	59.9077	175985	227289	51.1325	113193	0.065039	9.75878	531.046	37.7509	2.98102
450.524	99.6642	16805.1	74.0415	168579	233146	59.506	113679	-1.56379	5.73749	416.268	33.5191	2.43828
452.856	97.3637	17030.7	7.43793	171081	231517	82.9989	112643	-3.04847	10.9297	402.222	35.5565	2.6057
455.192	106.785	17401.9	83.1833	176046	222221	62.5033	119639	3.44333	17.9642	459.852	38.3568	3.85913
457.524	109.712	18225.6	77.3784	169016	230227	70.183	115885	3.4318	9.94501	694.719	39.028	0.682088
459.86	104.298	18057.3	25.8592	174260	224837	68.6873	117421	3.59887	11.8221	538.025	36.4758	4.03379
462.196	110.287	16851.2	92.1862	172995	229259	86.5539	113482	8.61666	13.4342	467.255	38.1194	3.76946
464.528	113.119	17662.5	59.2722	173384	223983	79.9368	120197	8.98651	1.3512	571.015	36.9051	6.80668
466.864	118.21	17693.9	77.0545	175112	222111	66.4019	120638	19.3903	12.3202	597.85	32.3885	3.69443
469.196	99.2953	17074.8	49.0424	171780	222834	61.4413	124931	9.46928	8.88627	352.263	35.4787	5.96055
471.532	117.789	17877.4	92.7655	169826	231133	66.6174	114055	6.31071	6.58472	325.455	37.4286	2.00739
473.864	111.443	18111.4	149.351	174483	225978	79.2835	115215	0.720273	6.1696	485.219	33.5838	4.71466
476.2	98.7188	17158.2	45.0027	169057	230747	67.8881	116401	16.1361	0.421025	378.864	41.2197	3.68525
478.536	104.553	17626.8	45.821	172202	227638	77.5016	116215	6.24554	15.8949	623.794	37.8985	3.54129
480.868	107.958	17409	44.2276	180704	219807	69.5466	117189	13.3242	8.53845	329.397	36.9809	3.61898
483.204	100.143	17375.6	88.1874	169020	227930	71.2063	120221	23.2901	14.2919	659.639	32.0484	4.38888
485.536	105.156	18015.9	18.5047	172510	222831	42.5938	123107	3.29726	7.44914	345.448	33.5689	1.26073
487.872	100.846	15591.1	50.8862	168972	229152	73.5987	120618	3.31754	13.7084	206.802	34.8061	0.655245
490.204	121.572	18531.8	38.8226	175323	227649	68.4193	111272	8.22786	14.2923	438.391	36.5148	1.22605
492.54	98.0758	16926.6	60.0971	176882	222472	70.6078	118628	-1.82741	3.34088	476.243	32.1662	3.6255
494.876	104.514	18035.9	35.6404	171841	228809	62.6788	114613	9.32556	-0.610511	565.202	30.4053	4.50894
497.208	93.1387	17216.5	12.9733	177355	219484	74.1364	122297	6.40322	8.36497	502.751	36.4714	1.63522
499.544	105.682	16406.3	-5.4103	172875	226870	55.3786	117969	-4.38176	2.51989	392.586	37.1132	6.31301
501.876	105.351	17575.5	66.7781	181399	221045	58.6486	114119	8.46806	4.26699	407.701	37.3212	6.95641
504.212	113.105	17993.7	2.52174	174498	223378	59.1313	119599	-3.12025	4.00208	350.558	38.4798	3.65332
506.548	109.083	17834.7	32.3783	167715	232070	75.0042	115446	0.723026	4.10196	492.291	38.0086	2.71464
508.88	114.109	17431.9	-7.99953	171467	229242	74.0846	114987	-3.11218	7.34929	651.561	38.2368	2.84101
511.216	104.131	17629.1	55.157	172960	228801	49.9426	113476	6.12496	11.6094	571.775	35.7268	4.23493
513.548	89.318	16761.8	13.0663	171489	227401	56.2317	118531	0.0549807	6.63253	555.93	38.5821	3.02639
515.884	102.037	17802.1	43.8414	172765	226493	57.9912	117326	7.30843	11.7874	337.042	34.0849	3.89619
518.216	96.6998	18252.1	73.7623	170339	229630	50.4509	115097	-6.93595	10.7202	635.058	34.1012	2.30768
520.552	98.8665	17263.9	31.429	184945	219719	72.1802	111762	0.0644398	10.0396	348.393	35.1831	3.62538
522.888	104.755	16397.2	75.4292	166431	240114	81.8316	106209	8.52455	10.1014	481.589	38.7236	3.72447
525.22	98.9617	16061	103.004	175680	226024	56.7989	115457	9.89064	13.9436	616.431	39.1177	2.58175
527.556	106.132	16588.9	60.8403	164073	234183	49.0568	118293	5.14168	9.14533	517.919	36.5332	3.94546
529.888	113.684	17569.6	-2.54529	171194	225362	59.12	121277	15.391	14.9864	495.587	37.5793	3.50893
532.224	101.815	17758.7	34.6581	180291	221805	65.4033	114107	3.28078	4.46964	642.346	35.7376	5.30347
534.556	103.336	16298.1	79.1747	176016	223998	73.2873	118055	0.0640462	0.225907	452.14	35.1543	4.59995
536.892	107.922	17558.5	85.3652	176285	225230	55.7501	114492	11.3619	18.6564	528.178	40.1911	2.1272
539.228	94.1549	17719.4	31.7081	169911	230820	71.3945	114588	12.8054	11.7885	402.716	37.3979	6.32055
541.56	109.441	17056	111.549	161925	242610	68.7179	107728	-3.14374	11.0119	578.986	39.3892	3.66545
543.896	96.6978	16758.7	33.9343	166851	235494	68.6855	112512	-6.23278	5.40967	414.786	41.6584	3.59808
546.228	97.314	18201	37.0347	172049	225213	71.6706	119883	3.24728	12.6376	325.157	37.029	2.84225
548.564	105.12	17175.3	77.1715	166375	227613	74.2328	124664	19.313	14.8414	449.302	40.9595	2.86074
550.9	115.415	17655.8	91.3662	174609	223474	48.4829	119395	14.0832	8.82865	467.454	39.7004	4.86852
553.232	111.553	17180.4	51.094	175556	228460	64.5845	111003	3.13396	5.70121	481.118	31.964	0.61052
555.568	110.145	17978	24.9086	181340	218359	54.3886	118087	3.38701	13.6306	276.316	35.8651	1.7073
557.9	112.98	18044.7	21.9482	172508	227446	55.8628	115946	-1.91774	10.6712	398.826	41.2585	1.27526
560.236	97.2949	17012.5	42.6576	178889	224337	60.8423	113041	10.9676	1.07227	423.367	40.819	2.85881
562.568	109.606	19096.1	53.7212	177228	216917	64.5196	124695	13.675	8.77897	292.068	42.8885	6.03363
564.904	107.735	16776.1	95.9887	179337	220631	58.9336	118262	12.9099	4.68163	406.579	40.4874	3.67168
567.24	95.2665	16866.7	34.225	161259	239157	59.5311	114421	0.0547682	6.07191	348.829	40.6121	3.61462
569.572	108.326	17373.7	-10.9392	171009	227726	68.5677	118098	0.727361	10.4092	532.928	40.0716	2.77129
571.908	100.715	16543.7	58.0527	167884	232274	79.1583	116233	8.31079	14.4828	358.822	37.6122	1.6269
574.24	110.495	17730.6	56.418	178074	223346	73.1746	114974	5.95375	9.56481	365.628	37.0659	1.51193
576.576	106.784	16582.9	63.5167	173261	225603	69.2405	119099	6.1668	11.7249	395.365	32.8193	5.41832
578.908	107.168	17946.4	49.0961	180578	221217	58.5997	114486	-1.91269	8.24135	575.108	35.4412	2.91727
581.244	106.657	16818.8	-5.15089	169319	233749	70.8183	111781	18.8158	11.7637	427.114	33.0479	2.06321
583.58	104.173	17797.4	36.084	172342	231250	77.5027	110549	10.0396	7.0501	412.417	36.5062	3.79991
585.912	111.348	17891.8	44.7724	168400	223949	71.1502	126808	5.7447	11.505	546.477	34.5649	2.01665
588.248	90.8942	18401.8	45.5872	173258	228643	73.8194	112764	-7.03201	6.18278	390.274	39.134	7.73148
590.58	97.6538	16639.4	57.4694	181850	217874	78.9761	119148	16.4949	13.4809	514.654	39.3172	5.82485
592.916	115.041	18558.9	91.072	173087	227198	67.9595	114731	0.0504102	4.48845	644.46	39.0454	2.32455
595.252	116.298	16604.4	83.6471	168969	234511	66.1426	111177	13.0339	9.66423	428.785	39.1865	3.70363
597.584	110.936	17976	69.6661	183584	222184	68.4864	108858	15.559	19.683	561.394	35.8515	5.49374
599.92	103.876	17560.5	39.195	169994	233541	65.9982	110440	0.0375823	8.18755	434.524	39.0994	3.60346
602.252	101.322	16996.1	43.408	171424	222097	57.4836	126622	-5.17058	9.13242	372.459	36.4977	2.31482
604.588	119.211	18349.8	29.5518	169675	222564	86.7804	126790	-3.16076	8.91829	519.767	35.9268	5.68069
606.92	112.485	17506.4	27.6138	171094	225686	79.1175	120857	0.70713	6.5453	596.09	39.7417	4.79286
609.256	108.1	18291.5	28.5892	182676	215380	69.8077	120393	6.18447	4.74963	413.462	38.1567	7.10709
611.592	102.108	17235	40.0584	165586	228848	67.6857	123877	6.20963	6.57683	433.823	37.7692	3.90204
613.924	109.641	16880.6	36.7204	175436	223295	68.2136	119563	-1.97693	12.9494	263.015	37.2457	1.72142
616.26	107.997	17639.7	33.4977	170134	230166	68.4812	115340	0.0470397	6.84356	431.423	37.8184	2.39848
618.592	93.8947	17897.9	81.8234	176408	220927	71.1372	120855	6.00152	11.0407	256.538	39.609	3.39652
620.928	118.088	16927.6	70.2875	164927	234396	90.4414	116270	-1.83205	9.30986	693.151	36.7096	3.56189
623.26	94.0527	17066	8.53623	170618	232561	73.4202	111610	0.044743	6.94488	441.927	43.5209	-0.394616
625.596	104.09	17604.1	68.8339	167933	228185	80.2854	121182	-3.39398	2.98096	604.429	31.4077	2.83635
627.932	103.995	16076.2	79.5575	180155	218586	63.8266	120967	3.12335	10.4031	432.772	37.1709	2.73478
630.264	122.792	17468.1	7.92564	179660	223970	62.4958	112070	0.0400388	11.8339	491.515	34.1556	3.45353
632.6	125.856	17607.8	65.2387	166946	235224	99.5431	111829	9.81867	4.54502	439.955	35.6784	8.84467
634.932	96.7746	18432.9	44.0613	171055	221998	75.2646	125796	5.96365	3.06867	444.122	40.8361	8.72077
637.268	112.249	18961.4	22.6115	172923	227580	58.3078	114188	0.042596	0.470776	523.564	40.6718	1.69956
639.6	109.555	17433.4	59.8688	173104	223400	52.9106	121957	0.0392852	4.5567	319.5	37.836	2.56822
641.936	103.401	17204.6	42.5476	179656	216544	48.0499	123767	-2.78997	7.11389	412.207	35.5106	-0.343389
644.272	119.712	18109.4	51.8196	170197	231987	60.8333	111769	5.61723	0.436882	662.573	40.6761	1.96632
646.604	94.6811	17369.8	25.4282	176500	224270	61.5126	115871	9.36179	6.18466	608.853	45.2454	5.71623
648.94	106.575	16987.2	68.3589	170062	229950	55.4211	116478	4.71711	11.3222	303.973	34.1078	2.07764
651.272	107.243	17400.4	62.557	167633	230823	62.4674	117915	13.916	7.1758	412.775	38.4115	1.76044
653.608	117.152	17912.1	44.7357	169868	227992	62.6077	118663	3.37309	12.7997	504.755	34.7596	2.95379
655.944	123.629	18529.1	17.9254	166454	232366	72.0893	116041	0.738413	12.2502	471.648	33.6234	2.87216
658.276	99.3987	17648.5	-19.6883	169101	228115	49.0888	120033	9.12549	16.6473	329.956	33.9333	-0.427939
660.612	103.861	17295.1	-2.25696	176067	226392	63.3621	113501	6.20292	7.72273	397.75	36.78	9.2906
662.944	97.384	16686.3	66.553	166273	237889	49.769	109627	3.35467	12.0826	457.431	34.7105	0.638122
665.28	90.9982	16796.4	85.2486	178953	221227	58.2129	117748	8.60575	7.21521	570.719	35.0006	2.08729
667.612	92.37	18595	54.7946	173452	223936	66.6298	119390	16.3921	18.1787	477.715	35.5135	6.19385
669.948	105.31	16678.6	70.2681	171244	227482	83.2563	118909	-1.90631	8.57655	331.929	37.801	2.65889
672.284	104.588	16176.2	85.6744	179623	223720	81.8968	113523	8.64463	11.6238	636.437	35.8118	0.42653
674.616	92.0891	16197.5	10.8617	167486	232329	68.6618	117211	-3.06859	15.1835	259.363	30.4575	-0.382531
676.952	112.13	17855.3	30.1162	182278	211203	68.8172	127759	13.6241	11.1456	367.315	40.8874	2.65894
679.284	111.765	16807.7	37.3344	169388	233203	61.2059	112597	0.621136	7.84404	319.698	38.5386	7.0889
681.62	103.51	19800.2	18.3491	167001	230738	65.3422	116538	3.09129	8.72581	538.608	35.3972	3.47892
683.952	110.402	17356	61.3579	173918	217312	63.6722	130061	0.0309415	5.92683	500.088	37.8488	1.61289
686.288	96.9707	18468.1	75.174	179175	216919	62.214	122502	-3.18137	15.0956	486.802	40.1916	2.6377
688.624	106.491	17683.3	39.5373	176607	221710	48.3176	119539	0.0315097	10.4333	380.37	40.7134	2.7501
690.956	111.41	17329.4	36.4067	179404	223641	84.1808	112975	11.302	8.13797	520.481	36.8777	6.55131
693.292	96.7267	16959.1	-2.00016	166063	227504	71.2878	125509	6.54283	13.8002	537.856	36.3526	2.0574
695.624	100.834	17337.3	32.0761	174268	227417	59.4454	114177	-1.86632	10.6719	530.118	39.249	3.58633
697.96	104.541	17668.7	86.7684	166528	233947	59.103	114190	3.27392	2.39687	606.516	36.9932	2.66302
700.296	103.055	17396.2	70.7954	179045	223200	70.0901	114156	15.139	11.0136	400.873	41.277	2.47982
702.628	105.039	16453.9	52.6358	168367	231522	57.7545	116795	8.24163	11.0469	406.022	35.8924	3.96433
704.964	123.976	17919	55.3487	181294	220997	71.9761	114013	2.4693	7.14572	377.993	35.1849	3.39741
707.296	117.359	18266.6	72.3688	167346	229056	66.1737	120159	6.20187	9.82671	401.285	35.314	1.94874
709.632	101.811	16978.6	13.7422	169917	227385	49.0096	120598	0.653277	6.67564	399.542	38.641	2.24493
711.964	116.603	17956.6	24.3755	164858	233093	58.5559	117703	7.41504	7.5703	403.032	40.9782	1.19936
714.3	98.2745	16531.3	51.4335	166187	235167	53.8504	114084	-3.19299	2.38057	453.193	38.4444	3.65161
716.636	94.7845	17750.3	62.1597	166690	230019	54.0869	120080	0.698472	3.82146	464.772	35.6635	0.637201
718.968	93.685	18017.3	33.0981	173027	230677	70.2694	110178	0.0262772	14.2896	565.221	38.734	1.78326
721.304	116.7	17037.3	78.9688	171048	224709	70.0012	122774	0.024514	10.0518	629.769	38.3544	2.97125
723.636	108.138	16033.6	39.5345	165364	237012	56.917	112872	6.027	5.33061	415.532	36.6621	2.73212
725.972	97.5532	16943.2	15.0129	177706	226040	63.5916	112050	-3.38854	16.4955	517.792	35.6149	6.02068
728.304	108.672	18005.7	53.2947	174875	224332	74.1313	117390	-4.63941	8.62273	532.473	33.8299	1.67783
730.64	109.04	17076.4	47.5367	170432	230238	74.0257	115342	8.63589	8.57935	430.885	30.1095	1.6688
732.976	91.5962	16745	71.8338	171949	227759	54.0925	117491	0.0206868	7.58825	361.041	34.2389	1.59786
735.308	96.8663	19068.3	64.0713	179582	223816	72.8068	110779	9.55681	6.55269	542.935	34.8035	2.80246
737.644	97.3512	18236.5	56.8525	170059	230407	59.0366	114368	3.23686	7.69412	566.92	31.9034	4.99809
739.976	89.0551	18397	42.1427	182361	218212	72.4637	116156	8.64494	14.0673	665.669	37.8903	5.85053
742.312	95.5639	16559.2	43.0454	171491	233048	90.5821	109956	6.37831	12.2258	612.219	33.167	2.00048
744.648	106.143	17729.4	83.2173	169767	228847	66.6094	117798	3.22299	8.0885	330.038	35.9616	6.66081
746.98	110.726	17326.8	56.4761	174873	221835	65.2205	121570	8.72858	9.78317	826.912	43.0317	2.38819
749.316	110.134	17355.4	17.4128	174993	224627	68.0658	117493	19.8846	6.39109	448.91	40.956	3.7513
751.648	112.338	17562.7	17.5144	178695	222548	58.0745	115429	6.67452	13.4578	514.534	38.0028	3.77055
753.984	107.583	18366.6	36.4791	173250	222783	58.3689	121730	3.31352	10.7172	420.199	37.113	2.07187
756.316	110.925	17896.3	104.684	176386	224297	57.433	115426	-1.95953	12.0125	562.833	33.6815	0.616482
758.652	108.012	16981.5	46.2235	168293	231331	75.6999	116725	8.37062	10.4481	339.883	38.9731	3.63915
760.988	104.366	15808.9	28.1254	166063	234725	69.3967	115768	16.3897	6.10698	275.295	36.082	2.67624
763.32	102.942	18648.5	50.2598	169507	227896	55.3832	118403	5.95942	0.925636	734.827	37.5602	3.7391
765.656	103.404	16712.8	58.9853	171151	229512	73.8024	115576	3.19592	4.04441	708.034	38.2046	1.99786
767.988	98.7834	16122.7	75.62	174478	223330	52.3361	121275	3.1196	3.94846	531.074	37.7866	-0.399466
770.324	111.172	17304.6	88.9047	171971	225535	74.9392	120083	5.79835	15.9707	523.324	41.2569	2.01718
772.656	101.055	18016.3	43.9717	174999	222130	69.8124	120631	8.67117	12.628	477.88	37.2804	3.99462
774.992	100.569	16507	40.9004	169324	230352	72.2434	117394	2.84953	4.35953	261.969	36.9979	4.10704
777.328	100.027	18564.3	14.0838	172322	221325	66.5684	125076	9.46866	10.4612	385.051	37.3353	4.56038
779.66	113.572	17525.1	60.0905	180874	218576	66.2011	118660	6.41282	11.3315	386.106	36.334	4.02291
781.996	107.338	17560.6	48.2393	174990	220969	72.0845	122992	6.03393	6.46556	327.049	34.4518	3.78514
784.328	110.41	17624.6	52.6011	182916	221058	73.6927	111978	3.46016	10.7648	430.801	41.6605	1.72738
786.664	106.528	17568.3	32.1579	175629	225727	51.0917	114783	-2.03095	0.733795	452.646	35.5623	4.70548
788.996	98.8933	17512.2	51.2614	181680	214297	57.9443	123969	-2.00655	11.1536	611.307	33.526	5.91822
791.332	96.6303	17961.5	34.6103	168955	231076	55.5825	115078	18.6905	13.6258	600.281	32.9122	1.95069
793.668	113.384	17684.6	6.56292	167819	234311	66.9568	112017	13.775	11.0976	507.406	38.2796	3.70594
796	96.1077	16751.4	74.0265	179164	222214	71.9494	115818	-4.55321	7.37266	769.658	41.7883	2.04024
798.336	117.962	16019.3	70.6842	173782	222565	38.2403	123625	-7.09394	13.2735	359.585	41.3999	5.68334
800.668	114.824	17608.4	19.9496	173569	227736	65.5945	114344	9.72963	13.3286	528.199	38.3544	6.93174
803.004	107.422	17647.5	74.5197	168749	227654	67.4557	121026	5.69919	7.57653	386.72	37.0505	6.76421
805.34	108.937	17438.6	123.79	168609	230830	74.4486	116491	0.00569406	13.9911	393.669	37.2625	3.5586
807.672	99.3745	16955	53.3961	170901	228202	55.6245	117985	-1.88621	9.42647	411.201	38.1728	2.56832
810.008	114.143	17707.7	43.0066	167910	236969	70.1567	107631	10.0868	17.1509	648.214	37.7607	3.79669
812.34	108.059	17107.5	19.5074	170416	231535	55.7612	113359	18.9761	16.9732	438.28	42.5419	7.55831
814.676	115.971	17678.6	29.1532	173173	227415	78.6346	115366	3.37	6.28824	448.31	40.3494	3.80195
817.008	121.616	17603.4	14.8379	174596	227532	74.1068	113318	-1.9668	10.2545	490.894	36.7587	1.63871
819.344	93.7484	16857.6	57.8763	175916	224315	47.244	117228	-9.76118	7.58565	460.114	37.5915	0.597963
821.68	107.644	17886.1	87.7756	173174	222162	88.1726	122998	29.3692	14.9313	558.715	31.8665	3.68444
824.012	97.2491	17589.5	47.6011	167347	233430	71.4426	114036	11.1831	12.66	545.274	37.8462	1.22527
826.348	118.013	18275	64.7439	176557	221643	56.772	118948	23.6254	8.07431	503.362	37.3692	1.59153
828.68	105.915	18002.8	36.7053	178778	222866	67.6411	114310	6.57489	14.1744	598.597	37.6915	0.94755
831.016	110.192	17644.5	30.0534	170627	231689	63.9053	112322	0.000430939	11.3308	455.41	33.0999	3.5663
833.348	104.286	17920.7	24.6716	164701	230616	63.5073	121882	9.42349	16.865	256.665	31.534	3.54499
835.684	106.277	18075	1.28329	175845	224781	70.589	115403	-0.000536322	11.9031	513.584	36.0643	2.60324
838.02	98.8528	17646.9	36.2468	175160	227759	62.7057	112136	3.24222	9.70423	537.985	35.3792	6.93072
840.352	118.636	17642.1	49.0821	185395	217003	54.0722	114722	5.76408	10.2191	540.071	36.3349	2.80599
842.688	111.905	17186.3	22.1511	177590	223613	70.8415	115729	12.5813	11.4908	410.874	42.6615	1.96214
845.02	109.609	17580	72.225	172520	226041	73.6003	118399	2.59957	8.47282	459.889	36.103	3.59048
847.356	108.664	17769.6	95.2926	173967	226130	59.8776	116015	4.44845	10.666	557.936	36.0751	5.28279
849.692	106.111	17703.4	44.7023	175704	221747	68.7834	120505	8.73972	15.4578	531.051	39.398	4.20506
852.024	114.586	19331.3	12.3558	179645	220513	52.974	115609	6.60654	5.30907	476.739	33.9435	2.05996
854.36	104.586	18087.7	6.99148	168862	229038	75.3154	118340	-3.35909	14.4703	474.763	32.8502	3.78198
856.692	102.802	17267.1	81.0133	166099	229030	58.8411	122730	3.30695	2.04051	558.709	35.3184	1.64571
859.028	109.025	16808.6	31.8856	166869	233126	66.9232	116032	-0.00563583	7.57222	427.442	33.2307	0.957245
861.36	105.602	17278.4	67.0877	173909	221259	59.448	124043	3.43457	8.48214	571.172	44.0481	0.407283
863.696	108.137	17828.8	17.4025	173956	225437	50.4922	117135	3.20993	8.56663	568.879	33.7796	0.583062
866.032	99.4033	16756.4	38.2252	164721	237715	68.9679	111864	9.51499	4.47236	526.931	36.852	6.57808
868.364	105.645	16068.4	82.981	165875	236499	64.1223	112864	8.24807	6.78068	432.374	33.3412	1.97605
870.7	108.104	17472.8	90.167	166989	235579	62.2137	111440	3.14224	14.2158	386.225	37.1921	1.56278
873.032	103.358	16637	56.8983	167231	234938	73.244	112842	8.27678	9.75175	485.904	36.359	4.3932
875.368	109.56	16907.6	44.5925	177684	221688	46.9849	118536	9.74662	16.3943	707.769	43.2851	2.02256
877.7	98.8505	16569.6	24.8145	179306	224722	66.9587	112285	3.12611	7.31874	478.147	37.2582	5.11233
880.036	114.027	18843.1	86.7764	172193	222944	85.7731	122388	0.67492	7.09471	392.449	34.4766	7.31614
882.372	103.023	17601.2	61.8769	168430	233888	68.3518	111913	-3.17951	6.98016	492.01	31.6311	4.36793
884.704	103.581	18044.3	-9.40447	175553	226957	61.042	112534	3.28871	11.4081	494.391	37.5051	6.21173
887.04	105.412	17158.7	68.5575	174514	223112	57.865	120446	-3.24721	14.3928	642.975	40.6216	2.01058
889.372	92.9205	16578.7	54.2789	174884	225298	51.1949	117398	-2.02046	9.58299	437.925	39.6267	-0.453125
891.708	107.628	16783.4	76.4702	175610	224926	72.5575	116830	3.33406	11.5722	310.755	37.3681	2.92277
894.044	99.2215	16755.5	19.5444	174369	230102	63.1026	110527	23.0198	7.88491	483.358	34.0084	7.42753
896.376	107.759	17555.7	51.3743	173979	224486	63.6897	118928	8.66096	16.8251	373.28	37.2458	4.80616
898.712	105.496	17217.7	60.5157	172574	230794	66.7908	111407	10.1354	13.7105	470.409	38.1676	4.87323
901.044	110.137	17970.4	70.0463	180490	224616	60.2741	109315	23.106	14.4762	575.818	36.343	3.71584
903.38	111.429	17837.9	-9.20479	174839	219558	84.2947	125051	3.2449	7.82941	417.916	41.0312	1.61152
905.712	102.419	18553.6	92.2783	179357	219373	75.6811	118467	-0.0156662	10.1498	397.944	36.3287	3.72768
908.048	109.179	17948.3	69.8361	176237	221821	68.442	119301	3.15265	19.3268	647.028	37.6115	1.9649
910.384	101.111	16141.3	51.4101	170551	229177	66.277	117898	-3.18055	13.036	242.6	35.4359	1.56327
912.716	105.025	18466.6	119.843	172433	228237	59.7102	114308	3.29889	9.27993	407.284	40.8069	4.56496
915.052	106.114	17783.2	72.145	173933	222766	64.6161	121319	-3.28866	11.5313	463.971	32.7359	2.64641
917.384	114.032	17520.7	38.9712	174919	226048	53.6849	115230	9.63518	14.1054	473.87	35.5106	3.61709
919.72	109.364	16865.1	50.6016	169966	227151	65.3247	120750	-4.60995	11.3458	598.776	35.9324	4.72038
922.052	102.339	15732.2	96.3716	170731	234751	65.3148	109345	3.15685	5.5327	381.516	35.1634	0.365192
924.388	104.506	17272.5	86.7974	173192	222626	63.2294	122917	8.0788	15.0937	551.773	34.2392	-0.427732
926.724	117.599	17698.3	93.0234	174929	222644	55.1592	120000	13.5949	7.79024	671.172	34.8645	1.59841
929.056	105.825	17297.9	49.6313	164592	236505	70.1446	113582	-9.66145	8.99775	290.271	37.6185	1.5843
931.392	106.167	17465.5	62.622	169618	228292	72.8399	118995	10.8495	5.15095	462.371	37.1664	1.97884
933.724	100.007	16971.3	74.619	172405	229362	53.4534	114158	18.8411	11.9154	360.82	39.5313	2.54007
936.06	106.862	16797	40.6952	177927	218811	71.4863	122933	9.39533	8.58155	471.088	35.1155	1.15028
938.396	109.93	16918.4	43.7413	170663	229609	66.9184	116086	0.61234	8.04023	501.676	43.756	1.56129
940.728	112.736	18316.3	82.5703	182936	221454	58.9113	110579	2.85496	12.9884	509.607	38.7669	5.94808
943.064	107.801	17308.3	61.1859	172553	226160	66.3226	118584	-5.01214	11.1544	327.565	36.8137	3.36216
945.396	104.956	17026.2	52.1473	173676	222687	59.5342	122567	5.73804	7.90754	428.408	36.6855	5.61192
947.732	108.66	17684.1	40.2748	182756	217160	64.1874	118039	2.89472	12.4055	524.973	35.2726	3.27394
950.064	101.666	17622.3	45.9993	172757	231330	67.5173	109886	-1.01393	7.15104	591.844	35.2568	2.4003
952.4	98.3231	16295.2	56.2483	173507	227347	56.5432	116233	6.85374	17.7081	583.639	35.0094	2.30043
954.736	109.953	16811.5	38.1637	172573	222605	58.0179	124299	2.44649	4.30181	537.711	42.2265	7.12168
957.068	111.037	18304.8	78.4048	169224	231943	64.5048	113124	5.13744	13.1865	457.384	33.7376	1.26752
959.404	98.9765	16670.3	6.88664	173684	228309	61.7276	114349	17.9398	15.6327	423.198	36.9569	2.49853
961.736	107.397	17714.1	65.6263	174749	224940	62.8219	117037	-0.0292323	14.3893	382.16	32.3795	2.15481
964.072	108.877	16960.5	45.24	169334	233509	78.2385	111998	-2.26105	15.0728	366.487	33.8749	1.356
966.404	113.682	17427.8	69.1756	177626	220490	72.1242	119748	-2.23879	11.2772	882.102	36.4433	7.60467
968.74	96.2034	17465	64.5726	165041	231436	55.7791	120162	10.7412	7.45368	705.257	45.6776	4.02715
971.076	104.601	18538.3	62.4316	176891	223251	57.786	115787	3.60627	7.55379	546.793	37.779	6.37542
973.408	103.317	18065.1	127.712	175987	220416	70.1703	122001	-0.0322073	11.743	233.103	40.2325	5.06502
975.744	100.409	17113.1	52.2121	172222	228816	56.0051	115071	3.01422	5.91408	448.946	37.3659	3.41091
978.076	102.887	17714.8	85.5538	179714	221466	89.9955	115694	-0.0307249	6.11329	286	36.4948	3.64905
980.412	109.571	16362.7	33.5008	164379	234630	71.4273	117351	5.69148	-4.94593	607.252	40.295	2.22651
982.744	115.616	16298.2	-43.6748	176075	223784	57.2651	118492	3.20474	7.78853	389.822	32.6858	3.62698
985.08	109.947	17116.8	63.6804	170763	227092	76.0977	119611	27.6944	17.7409	425.703	40.0433	-0.475902
987.416	123.422	17533.5	114.992	170265	229855	55.5466	115407	-1.26277	9.09365	672.708	39.321	2.57436
989.748	103.07	17230.7	83.3543	166264	228322	56.9887	123824	-2.13604	13.5115	336.236	35.9008	0.389514
992.084	101.765	16610.5	16.2189	162771	237784	63.5672	114462	5.1994	10.0634	634.022	34.6264	8.75152
994.416	117.355	17096.2	22.8061	175763	225222	62.2703	115843	-1.92277	11.742	413.725	32.4193	1.54145
996.752	101.768	17439.4	77.0877	180830	221005	70.2405	115116	6.67022	6.30062	349.476	35.9719	7.98471
999.088	111.005	15907.3	-39.6493	170468	224187	67.0647	126035	3.31999	-1.89299	158.513	40.2586	2.91187
[truncated: 1,113 more rows]

## Sheet: Li4
Sample	T [°C]	t [s]	p [bar]
Li4	750	258593	2000
[truncated: 1,639 more rows]

## Sheet: Li2
Sample	T [°C]	t [s]	p [bar]
[truncated: 1,594 more rows]

## Sheet: Li26
Sample	T [°C]	t [s]	p [bar]
[truncated: 1,640 more rows]

[truncated: 10 more sheets: Li23, Li22, Li27, Li21, Li1, Li5, Li36, Li19, Li37, Table 2]
