# Supplementary material for: Li diffusion in plagioclase crystals and glasses – implications for timescales of geological processes
Source: Copernicus journal article supplement (doi:10.5194/ejm-36-985-2024), 2024-12-02
Supplement: Supplementary file 2 [file ejm-36-985-2024-supplement.zip]

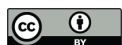

## *Supplement of*

# **Li diffusion in plagioclase crystals and glasses – implications for timescales of geological processes**

**Florian Pohl et al.**

*Correspondence to:* Florian Pohl (f.pohl@mineralogie.uni-hannover.de)

- ejm-36-985-2024-supplement-title-page.pdf
- S1.pdf
- S2.pdf
- S3 .pdf
- supplementary\_data.xlsx

The copyright of individual parts of the supplement might differ from the article licence.
