# Supplementary material for: Li diffusion in plagioclase crystals and glasses – implications for timescales of geological processes
Source: Copernicus journal article supplement (doi:10.5194/ejm-36-985-2024), 2024-12-02
Supplement: Supplementary file 4 [file ejm-36-985-2024-supplement.zip]

## S2 Derivation of the effective binary interdiffusion coefficient

Plagioclase consists primarily of an albite ( $\text{Ab}=\text{NaAlSi}_3\text{O}_8$ ) and anorthite ( $\text{An}=\text{CaAl}_2\text{Si}_2\text{O}_8$ ) component, with a minor portion of orthoclase ( $\text{Or}=\text{KAlSi}_3\text{O}_8$ ). Even though K is diffusing slightly faster than Ca in plagioclase (see overview of Cherniak, 2010), it can be neglected in the consideration of the diffusion coefficient due to the combination of its relatively slow diffusion coefficient ( $D_{\text{Li}}^* \gg D_{\text{Na}}^* \gg D_{\text{K}}^* > D_{\text{Ca}}^*$ ; Behrens et al., 1990; Giletti and Shanahan, 1997) and low concentration. Therefore, we are only considering the three components  $\text{LiAlSi}_3\text{O}_8$ ,  $\text{NaAlSi}_3\text{O}_8$  and  $\text{CaAl}_2\text{Si}_2\text{O}_8$  for our model of effective binary diffusion in a ternary solid solution. The thermodynamic factor is ignored since the albite/anorthite component can be considered fixed.

The molar fraction  $X_i$  of a components  $i$  can then be calculated by

$$X_{\text{Li}} + X_{\text{Na}} + X_{\text{Ca}} = 1 \quad (\text{S2.1})$$

The flux of Li in this system is given by

$$\begin{aligned} J_{\text{Li}} &= -D_{\text{Li-Li}} \frac{\partial X_{\text{Li}}}{\partial x} - D_{\text{Li-Na}} \frac{\partial X_{\text{Na}}}{\partial x} - D_{\text{Li-Ca}} \frac{\partial X_{\text{Ca}}}{\partial x} \\ &= -D_{\text{Li-Li}} \frac{\partial X_{\text{Li}}}{\partial x} - D_{\text{Li-Na}} \frac{\partial X_{\text{Ab}}}{\partial x} - D_{\text{Li-Ca}} \frac{\partial X_{\text{An}}}{\partial x} \\ &= -D_{\text{Li-Li}} \frac{\partial X_{\text{Li}}}{\partial x} - D_{\text{Li-Na}} \frac{\partial X_{\text{Li}}}{\partial x} \frac{\partial X_{\text{Na}}}{\partial X_{\text{Li}}} - D_{\text{Li-Ca}} \frac{\partial X_{\text{Li}}}{\partial x} \frac{\partial X_{\text{Ca}}}{\partial X_{\text{Li}}} \\ &= -\left(D_{\text{Li-Li}} + D_{\text{Li-Na}} \frac{\partial X_{\text{Na}}}{\partial X_{\text{Li}}} + D_{\text{Li-Ca}} \frac{\partial X_{\text{Ca}}}{\partial X_{\text{Li}}}\right) \frac{\partial X_{\text{Li}}}{\partial x} \end{aligned} \quad (\text{S2.2})$$

Here  $D_{i-i}$  and  $D_{i-j}$  are the main and cross diffusion coefficients of the components  $i$  and  $j$  in the diffusion matrix for multi component diffusion.

Now  $D_{\text{EB}}$  is the effective binary diffusion coefficient with

$$J_{\text{Li}} = -D_{\text{EB}} \frac{\partial X_{\text{Li}}}{\partial x} \quad (\text{S2.3})$$

Then

$$D_{\text{EB}} = D_{\text{Li-Li}} + D_{\text{Li-Na}} \frac{\partial X_{\text{Na}}}{\partial X_{\text{Li}}} + D_{\text{Li-Ca}} \frac{\partial X_{\text{Ca}}}{\partial X_{\text{Li}}} \quad (\text{S2.4})$$

Due to the large difference in diffusivity between Li and Ca (see overview of Cherniak, 2010) we can assume  $D_{\text{Li-Ca}} \sim 0$  and therefore

$$D_{\text{EB}} = D_{\text{Li-Li}} + D_{\text{Li-Na}} \frac{\partial X_{\text{Na}}}{\partial X_{\text{Li}}} \quad (\text{S2.5})$$

Due to the low variation in  $X_{\text{Li}}$  (variation only through diffusing Li), as well as  $X_{\text{Ca}}$  being constant and the close to ideal Ab-An solution (Holland and Powell, 1992) we can assume no activity coefficient gradients for the Li component (Dohmen and Blundy, 2014), as well as a near ideal solution ( $\gamma \approx 1$ ). This leads to the following equations for  $D_{\text{Li-Li}}$  and  $D_{\text{Li-Na}}$  (Lasaga, 1979).

$$D_{\text{Li-Li}} = D_{\text{Li}}^* \frac{X_{\text{Li}} D_{\text{Ca}}^* + X_{\text{Na}} D_{\text{Na}}^* + 4X_{\text{Ca}} D_{\text{Ca}}^*}{X_{\text{Li}} D_{\text{Li}}^* + X_{\text{Na}} D_{\text{Na}}^* + 4X_{\text{Ca}} D_{\text{Ca}}^*} \quad (\text{S2.6})$$

$$D_{\text{Li-Na}} = X_{\text{Li}} D_{\text{Li}}^* \frac{D_{\text{Ca}}^* - D_{\text{Na}}^*}{X_{\text{Li}} D_{\text{Li}}^* + X_{\text{Na}} D_{\text{Na}}^* + 4X_{\text{Ca}} D_{\text{Ca}}^*} \quad (\text{S2.7})$$

Now using the derivation  $\frac{\partial}{\partial X_{\text{Li}}}$  of Eq. (S2.1), with  $X_{\text{An}}$  being a constant, we get the numerical approximation

$$\frac{\partial X_{\text{Na}}}{\partial X_{\text{Li}}} = -1 \quad (\text{S2.8})$$

And inserting it into Eq. (S2.5) yields

$$D_{\text{EB}} = D_{\text{Li-Li}} + D_{\text{Li-Na}} \frac{\partial X_{\text{Na}}}{\partial X_{\text{Li}}} = D_{\text{Li-Li}} - D_{\text{Li-Na}} \quad (\text{S2.9})$$

As already previously mentioned the large difference in diffusivity between Li and Ca allows for the assumption  $D_{Ca} \sim 0$ . Now combining this assumption with Eq. (S2.5), as well as Eq. (S2.6) and Eq. (S2.7), yields

$$D_{EB} = \frac{X_{Na}D_{Li}^*D_{Na}^*}{X_{Li}D_{Li}^* + X_{Na}D_{Na}^*} \quad (S2.10)$$

Further rearranging the equation leads to

$$D_{EB} = \frac{D_{Li}^*}{\frac{X_{Li}}{X_{Na}} \frac{D_{Li}^*}{D_{Na}^*} + 1} \quad (S2.11)$$

This version of the equation clearly shows the influence of the ratios  $D_{Li}^*/D_{Na}^*$  and  $X_{Li}/X_{Na}$  on  $D_{EB}$ .  $D_{EB}$  approaches the tracer diffusion coefficient of Li when either or both ratios are small. In other words,  $D_{EB}$  slows down in comparison to  $D_{Li}^*$  with increasing Li concentration. This difference will be more pronounced the further apart the tracer diffusion coefficients of Li and Na are. Since the  $D_{Li}^*/D_{Na}^*$  ratio is temperature dependent, the difference between  $D_{EB}$  and  $D_{Li}^*$  is also temperature dependent. One important point is that  $D_{EB}$  is already affected at low Li concentrations between 1-5 ppm if  $D_{Na}^*$  is slow enough in comparison to  $D_{Li}^*$ .

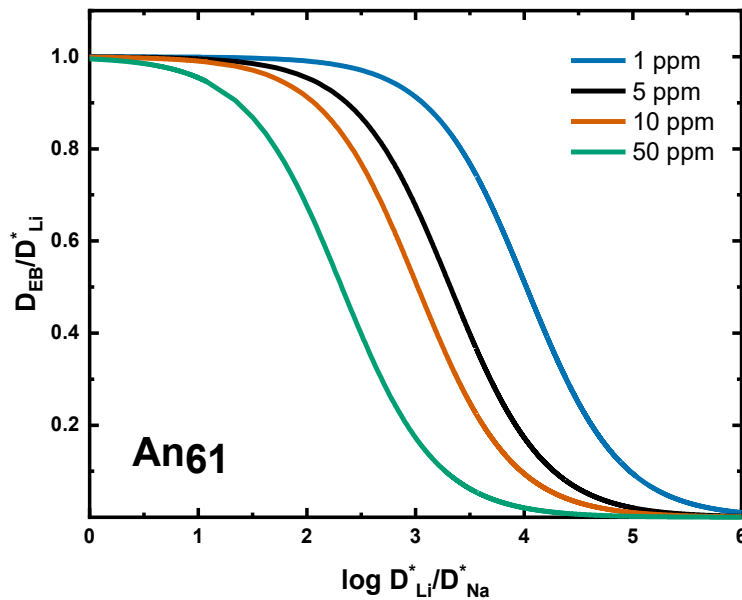

**Figure S2.1: Dependence of  $D_{EB}$  on  $D_{Li}^*/D_{Na}^*$  for an  $An_{61}$  labradorite crystal for different Li concentrations. At higher Li concentration,  $D_{EB}$  already starts to decrease at  $D_{Li}^*/D_{Na}^*$  ratios closer to 1.**

Behrens, H., Johannes, W., and Schmalzried, H.: On the Mechanisms of Cation Diffusion Processes in Ternary Feldspars, *Physics and Chemistry of Minerals*, 17, 62-78, <https://doi.org/10.1007/BF00209227>, 1990.

Cherniak, D. J.: Cation Diffusion in Feldspars, *Reviews in Mineralogy & Geochemistry*, 72, 691-733, <https://doi.org/10.2138/rmg.2010.72.15>, 2010.

Dohmen, R. and Blundy, J.: A predictive thermodynamic model for element partitioning between plagioclase and melt as a function of pressure, temperature and composition, *American Journal of Science*, 314, 1319-1372, <https://doi.org/10.2475/09.2014.04>, 2014.

Giletti, B. J. and Shanahan, T. M.: Alkali diffusion in plagioclase feldspar, *Chemical Geology*, 139, 3-20, [https://doi.org/10.1016/S0009-2541\(97\)00026-0](https://doi.org/10.1016/S0009-2541(97)00026-0), 1997.

Holland, T. and Powell, R.: Plagioclase feldspars: activity-composition relations based upon Darken's quadratic formalism and Landau theory, *American Mineralogist*, 77, 53-61, 1992.

Lasaga, A. C.: Multicomponent exchange and diffusion in silicates, *Geochimica et Cosmochimica Acta*, 43, 455-469, 1979.
